# Supplementary material for: Sustained TNF-α stimulation leads to transcriptional memory that greatly enhances signal sensitivity and robustness
Source: eLife. 2020 Nov 6;9:e61965. doi: 10.7554/eLife.61965 (PMC7704108; doi:10.7554/eLife.61965)
Supplement: Figure 1—source data 1. [file elife-61965-fig1-data1.xlsx]

## Sheet: Sheet1
Time of TNF-α induction	First induction			Second induction with a 12 h TNF-α pretreatment			Second induction with a 12 d TNF-α pretreatment
0 h	0.912409	1.18978	0.896898	1.05292	1.04927	1.0219	5.4635	5.3677	4.54106
3 h	11.3595	9.19708	9.40694	11.0748	11.802	10.8011	65.7099	68.7901	67.9343
6 h	23.6505	24.0283	30.8294	28.7354	23.615	29.8339	206.716	188.162	168.403
9 h	46.7707	63.5856	45.8939	53.0696	47.8117	49.7871	332.674	344.604	310.372
12 h	66.9529	55.5836	48.8833	56.7716	64.7943	64.3893	476.343	494.518	410.562
