# Supplementary material for: Sustained TNF-α stimulation leads to transcriptional memory that greatly enhances signal sensitivity and robustness
Source: eLife. 2020 Nov 6;9:e61965. doi: 10.7554/eLife.61965 (PMC7704108; doi:10.7554/eLife.61965)
Supplement: Figure 2—source data 5. [file elife-61965-fig2-data5.xlsx]

## Sheet: Sheet1
Time of TNF-α induction	First induction			Second induction with a 12 d TNF-α pretreatment
0 h	0.879275	1.04018	1.08063	7.01398	7.75961	7.41757
3 h	2.82951	2.54814	2.55166	19.5261	19.6817	17.902
6 h	6.78449	6.97353	7.17401	30.0521	36.4903	33.3195
9 h	13.6362	13.5058	12.8	64.4144	58.6695	64.4569
12 h	17.7551	17.7136	16.329	74.1334	78.7342	78.1993
