# Supplementary material for: Sustained TNF-α stimulation leads to transcriptional memory that greatly enhances signal sensitivity and robustness
Source: eLife. 2020 Nov 6;9:e61965. doi: 10.7554/eLife.61965 (PMC7704108; doi:10.7554/eLife.61965)
Supplement: Figure 2—source data 6. [file elife-61965-fig2-data6.xlsx]

## Sheet: Sheet1
	0 h TNF-α			9 h TNF-α
0 d TNF-α	0.95568	0.991775	1.05255	15.079	16.7123	15.9186
12 d TNF-α+10 d	6.61221	7.82798	7.56025	69.0892	67.0966	81.6935
12 d TNF-α+30 d	4.46318	5.14409	5.49802	72.2068	71.621	78.208
