# Supplementary material for: Sustained TNF-α stimulation leads to transcriptional memory that greatly enhances signal sensitivity and robustness
Source: eLife. 2020 Nov 6;9:e61965. doi: 10.7554/eLife.61965 (PMC7704108; doi:10.7554/eLife.61965)
Supplement: Figure 3—source data 1. [file elife-61965-fig3-data1.xlsx]

## Sheet: Sheet1
	0 h TNF-α			12 h TNF-α			12 d TNF-α
WT	1.07411	1.06015	0.865736	25.2696	24.5714	26.1343	128.361	119.916	110.692
RELA KO	1.51557	1.57895	1.35123	4.29431	4.04082	4.77014	3.73684	3.39527	3.23093
