# Supplementary material for: Sustained TNF-α stimulation leads to transcriptional memory that greatly enhances signal sensitivity and robustness
Source: eLife. 2020 Nov 6;9:e61965. doi: 10.7554/eLife.61965 (PMC7704108; doi:10.7554/eLife.61965)
Supplement: Figure 3—source data 2. [file elife-61965-fig3-data2.xlsx]

## Sheet: Sheet1
	0 h TNF-α			12 h TNF-α			12 d TNF-α+10 d			12 d TNF-α+10 d+12 h TNF-α
WT	1.08818	0.937435	0.974383	23.5583	20.6054	20.5094	4.3429	4.38905	4.19487	79.0851	72.3564	66.1809
RELA KO	0.900584	0.840684	0.877805	2.95609	2.83937	2.80161	0.789758	0.754456	0.730366	2.17783	1.80698	1.67875
