# Supplementary material for: Sustained TNF-α stimulation leads to transcriptional memory that greatly enhances signal sensitivity and robustness
Source: eLife. 2020 Nov 6;9:e61965. doi: 10.7554/eLife.61965 (PMC7704108; doi:10.7554/eLife.61965)
Supplement: Figure 3—source data 3. [file elife-61965-fig3-data3.xlsx]

## Sheet: Sheet1
CGRP (ng/mL)	0 h TNF-α		12 h TNF-α		12 d TNF-α+10 d		12 d TNF-α+10 d+12 h TNF-α
WT	173.666	166.172	1623.78	1582.39	875.565	888.211	5154.54	5041.36
RELA KO	130.872	126.905	240.509	229.602	115.395	127.821	179.931	189.033
