# Supplementary material for: Sustained TNF-α stimulation leads to transcriptional memory that greatly enhances signal sensitivity and robustness
Source: eLife. 2020 Nov 6;9:e61965. doi: 10.7554/eLife.61965 (PMC7704108; doi:10.7554/eLife.61965)
Supplement: Figure 3—source data 4. [file elife-61965-fig3-data4.xlsx]

## Sheet: Sheet1
0	2 d	4 d	8 d	12 d
0.931797	33.7264	53.6485	95.0415	110.454
0.982442	37.5167	53.6653	85.355	101.971
1.08576	40.6168	66.936	103.273	117.766
