# Supplementary material for: Sustained TNF-α stimulation leads to transcriptional memory that greatly enhances signal sensitivity and robustness
Source: eLife. 2020 Nov 6;9:e61965. doi: 10.7554/eLife.61965 (PMC7704108; doi:10.7554/eLife.61965)
Supplement: Figure 3—source data 5. [file elife-61965-fig3-data5.xlsx]

## Sheet: Sheet1
TNF-α pretreatment	0 h TNF-α			12 h TNF-α
0 d	0.94497	1.00689	1.04814	16.9445	19.1614	20.9869
2 d	1.95659	1.93907	1.98712	41.6854	40.6257	43.5278
4 d	2.67377	2.28774	2.55971	51.7727	50.4535	49.459
8 d	5.11126	4.49348	4.79243	69.1424	72.3567	76.641
12 d	5.58997	5.59182	5.45461	75.8802	71.1901	73.9283
