# Supplementary material for: Sustained TNF-α stimulation leads to transcriptional memory that greatly enhances signal sensitivity and robustness
Source: eLife. 2020 Nov 6;9:e61965. doi: 10.7554/eLife.61965 (PMC7704108; doi:10.7554/eLife.61965)
Supplement: Figure 3—source data 6. [file elife-61965-fig3-data6.xlsx]

## Sheet: Sheet1
	0 h TNF-α			12 h TNF-α			12 d TNF-α
WT	1.03627	0.988601	0.975129	23.2648	25.416	23.5906	132.445	118.909	123.329
TET1 KO	0.995855	1.03834	1.12435	28.0967	31.0235	26.3277	110.955	109.939	104.385
TET2 KO	0.971831	1.05446	0.994366	20.9277	21.1859	20.615	14.3181	14.7793	14.2466
TET3 KO	0.509845	0.527461	0.55544	17.4103	18.0826	15.83	65.6406	63.7478	67.3383
TET TKO	1.30047	1.38216	1.2216	5.96995	5.47887	4.78967	3.52021	3.51295	2.92643
