# Supplementary material for: Sustained TNF-α stimulation leads to transcriptional memory that greatly enhances signal sensitivity and robustness
Source: eLife. 2020 Nov 6;9:e61965. doi: 10.7554/eLife.61965 (PMC7704108; doi:10.7554/eLife.61965)
Supplement: Figure 3—source data 7. [file elife-61965-fig3-data7.xlsx]

## Sheet: Sheet1
	0 h TNF-α			9 h TNF-α			12 d TNF-α+10 d			12 d TNF-α+10 d+9 h TNF-α
WT	0.893655	1.08311	1.02323	12.7051	12.748	13.4281	7.56568	7.40125	7.73816	67.9669	60.8141	63.7712
TET1 KO	0.70922	0.795036	0.697163	11.7986	11.9057	9.05248	9.09858	8.68652	8.94113	45.8454	39.5227	54.6149
TET2 KO	0.951743	1.02681	0.840036	15.1332	15.1385	14.4191	1.3235	1.17069	1.18767	20.5764	18.5889	18.8561
TET3 KO	0.32695	0.314894	0.314894	6.36596	7.4383	8.48156	3.05745	2.4305	2.23972	33.9042	33.9418	28.1773
TET TKO	1.64142	1.74305	1.70662	4.09012	4.00863	3.29434	1.43432	1.20134	1.32119	2.79099	2.69607	2.3605
