# Supplementary material for: Sustained TNF-α stimulation leads to transcriptional memory that greatly enhances signal sensitivity and robustness
Source: eLife. 2020 Nov 6;9:e61965. doi: 10.7554/eLife.61965 (PMC7704108; doi:10.7554/eLife.61965)
Supplement: Figure 3—source data 8. [file elife-61965-fig3-data8.xlsx]

## Sheet: table-for-fig3H
gene	cell	timePoint	val1	val2	val
EGFP	WT	0 h TNF	1.5	0.6	1
EGFP	WT	9 h TNF	79.4	76.3	77.9
EGFP	WT	12 d TNF + 10 d	6.5	6.9	6.7
EGFP	WT	12 d TNF + 10 d + 9 h TNF	315.5	315.2	315.4
EGFP	TKO	0 h TNF	7	9.7	8.4
EGFP	TKO	9 h TNF	75.8	120.8	98.3
EGFP	TKO	12 d TNF + 10 d	7.2	6.3	6.8
EGFP	TKO	12 d TNF + 10 d + 9 h TNF	68.4	63.5	66
CALCB	WT	0 h TNF	4.1	3	3.6
CALCB	WT	9 h TNF	53.6	56	54.8
CALCB	WT	12 d TNF + 10 d	29.2	36.7	33
CALCB	WT	12 d TNF + 10 d + 9 h TNF	277.7	260.6	269.2
CALCB	TKO	0 h TNF	6.9	5.3	6.1
CALCB	TKO	9 h TNF	15.4	20.6	18
CALCB	TKO	12 d TNF + 10 d	5.7	4.2	5
CALCB	TKO	12 d TNF + 10 d + 9 h TNF	14.3	11.1	12.7
PTGES	WT	0 h TNF	0	0.2	0.1
PTGES	WT	9 h TNF	9.7	7.7	8.7
PTGES	WT	12 d TNF + 10 d	1	1.1	1.1
PTGES	WT	12 d TNF + 10 d + 9 h TNF	26.3	28.3	27.3
PTGES	TKO	0 h TNF	0.3	0.1	0.2
PTGES	TKO	9 h TNF	1	1.3	1.1
PTGES	TKO	12 d TNF + 10 d	0.3	0.3	0.3
PTGES	TKO	12 d TNF + 10 d + 9 h TNF	0.6	1.1	0.9
LHX2	WT	0 h TNF	1.2	0.6	0.9
LHX2	WT	9 h TNF	2.2	1.8	2
LHX2	WT	12 d TNF + 10 d	1.2	1.2	1.2
LHX2	WT	12 d TNF + 10 d + 9 h TNF	3.3	4	3.7
LHX2	TKO	0 h TNF	0.7	0.8	0.8
LHX2	TKO	9 h TNF	1.2	2.3	1.8
LHX2	TKO	12 d TNF + 10 d	0.6	0.8	0.7
LHX2	TKO	12 d TNF + 10 d + 9 h TNF	1.6	1.1	1.4
TNF	WT	0 h TNF	0	0.1	0
TNF	WT	9 h TNF	4.6	4.3	4.5
TNF	WT	12 d TNF + 10 d	0.1	0	0
TNF	WT	12 d TNF + 10 d + 9 h TNF	6	6.5	6.3
TNF	TKO	0 h TNF	0	0.1	0.1
TNF	TKO	9 h TNF	2.2	2.2	2.2
TNF	TKO	12 d TNF + 10 d	0	0	0
TNF	TKO	12 d TNF + 10 d + 9 h TNF	1.4	1.4	1.4
CCL2	WT	0 h TNF	0	0.2	0.1
CCL2	WT	9 h TNF	2.4	2.8	2.6
CCL2	WT	12 d TNF + 10 d	0.2	0.3	0.3
CCL2	WT	12 d TNF + 10 d + 9 h TNF	6	5.1	5.5
CCL2	TKO	0 h TNF	0.6	0.6	0.6
CCL2	TKO	9 h TNF	10.2	8.1	9.2
CCL2	TKO	12 d TNF + 10 d	1	0.7	0.8
CCL2	TKO	12 d TNF + 10 d + 9 h TNF	8.8	9.6	9.2
IL32	WT	0 h TNF	0.220111	0.0865487	0.2
IL32	WT	9 h TNF	16.6982	14.9172	15.8
IL32	WT	12 d TNF + 10 d	0.709021	2.04343	1.4
IL32	WT	12 d TNF + 10 d + 9 h TNF	16.3352	17.5807	17
IL32	TKO	0 h TNF	0.92074	0.802183	0.9
IL32	TKO	9 h TNF	17.9445	24.0079	21
IL32	TKO	12 d TNF + 10 d	0.952679	0.849785	0.9
IL32	TKO	12 d TNF + 10 d + 9 h TNF	18.502	17.845	18.2
