# Supplementary material for: Sustained TNF-α stimulation leads to transcriptional memory that greatly enhances signal sensitivity and robustness
Source: eLife. 2020 Nov 6;9:e61965. doi: 10.7554/eLife.61965 (PMC7704108; doi:10.7554/eLife.61965)
Supplement: Figure 5—source data 1. [file elife-61965-fig5-data1.xlsx]

## Sheet: Sheet1
	0 d TNF-α			12 d TNF-α
WT	0.912861	0.99037	1.09677	113.609	117.208	127.351
ERV KO	0.636631	0.651322	0.694417	0.659919	0.66871	0.651496
