# Supplementary material for: Sustained TNF-α stimulation leads to transcriptional memory that greatly enhances signal sensitivity and robustness
Source: eLife. 2020 Nov 6;9:e61965. doi: 10.7554/eLife.61965 (PMC7704108; doi:10.7554/eLife.61965)
Supplement: Figure 5—source data 2. [file elife-61965-fig5-data2.xlsx]

## Sheet: Sheet1
	0 h TNF-α			12 h TNF-α			12 d TNF-α+10 d			12 d TNF-α+10 d+12 h TNF-α
WT	1.13041	0.921069	0.948518	22.5119	20.8148	22.6378	4.0917	4.61586	4.34425	67.5268	79.3676	68.8115
ERV KO	0.517666	0.532751	0.54324	0.701365	0.694187	0.704763	0.604326	0.565264	0.586427	0.792496	0.684099	0.652316
