# Supplementary material for: Sustained TNF-α stimulation leads to transcriptional memory that greatly enhances signal sensitivity and robustness
Source: eLife. 2020 Nov 6;9:e61965. doi: 10.7554/eLife.61965 (PMC7704108; doi:10.7554/eLife.61965)
Supplement: Figure 5—source data 3. [file elife-61965-fig5-data3.xlsx]

## Sheet: Sheet1
CGRP (ng/mL)	Control		12 h TNF-α		12 d TNF-α+10 d		12 d TNF-α+10 d+12 h TNF-α
WT	171.02	167.563	1634.23	1570.78	833.133	865.174	5408.53	5018.99
ERV KO	106.626	110.158	125.661	127.695	114.452	120.085	132.998	134.907
