# Supplementary material for: Sustained TNF-α stimulation leads to transcriptional memory that greatly enhances signal sensitivity and robustness
Source: eLife. 2020 Nov 6;9:e61965. doi: 10.7554/eLife.61965 (PMC7704108; doi:10.7554/eLife.61965)
Supplement: Figure 6—source data 2. [file elife-61965-fig6-data2.xlsx]

## Sheet: Sheet1
	CpG num 250 bp around motif（including kB）	total demethyl
TNF	4	268
IL32	3	192
CCL2	5	217
CALCB	13	573
PTGES	12	659
LHX2	12	792
EGFP	14	713
