# Supplementary material for: Sustained TNF-α stimulation leads to transcriptional memory that greatly enhances signal sensitivity and robustness
Source: eLife. 2020 Nov 6;9:e61965. doi: 10.7554/eLife.61965 (PMC7704108; doi:10.7554/eLife.61965)
Supplement: Figure 6—source data 5. [file elife-61965-fig6-data5.xlsx]

## Sheet: data-for-fig6k
gene	gene_id	lfc_12h	lfc_12d+10d+12h	distance_to_TSS
ADSL	ENSG00000239900	0.0656185	-0.000819277	-72070
ADTRP	ENSG00000111863	0	0.0244379	-27587
ANGPTL7	ENSG00000171819	0	0.0233466	-19714
ANXA11	ENSG00000122359	0.236507	0.161279	-25393
ARNT2	ENSG00000172379	0.429741	0.244222	15351
ATL2	ENSG00000119787	0.187421	0.186931	-60372
ATP5G1	ENSG00000159199	-0.0913412	-0.291932	-20834
BATF	ENSG00000156127	0	0	17686
C10orf10	ENSG00000165507	1.57682	0.726465	5060
C1orf109	ENSG00000116922	0.0973806	0.230731	26881
C21orf33	ENSG00000160221	-0.263142	-0.254888	37321
CALCB	ENSG00000175868	3.90428	5.79864	-3578
CCDC124	ENSG00000007080	0.0219451	-0.139193	-1031
CD58	ENSG00000116815	0.31315	0.401205	-2754
CHGA	ENSG00000100604	-0.15364	0.0293997	1247
CHST15	ENSG00000182022	0.850349	0.954386	-1651
CNPY1	ENSG00000146910	0.193175	0.077905	37288
CREB5	ENSG00000146592	0.361232	0.2589	95296
CYB5D2	ENSG00000167740	-0.386339	-0.327707	42813
DACT2	ENSG00000164488	0	0	32562
DENND2D	ENSG00000162777	0.275968	0.122011	7451
DPYSL2	ENSG00000092964	-0.100692	-0.198971	9301
ECI2	ENSG00000198721	-0.212986	-0.218601	-201224
EFNA1	ENSG00000169242	2.12767	2.37765	-2887
EGFL6	ENSG00000198759	1.05257	0.946515	3509
EIF5AL1	ENSG00000253626	-0.0252317	-0.179508	16420
ETV6	ENSG00000139083	0.152891	0.301018	96314
EVI5	ENSG00000067208	0.169027	0.32287	61023
F2RL1	ENSG00000164251	0.241074	0.302491	12227
FAM193B	ENSG00000146067	0.028894	-0.152019	16534
FAM234B	ENSG00000084444	0.298081	0.384294	9199
FBXO6	ENSG00000116663	0.204545	0.270697	3497
FCGR3B	ENSG00000162747	-0.0249973	-0.0249973	12124
FRMD1	ENSG00000153303	0.290636	0.148614	-89409
GALNT2	ENSG00000143641	-0.1686	-0.16164	-52397
GLRX3	ENSG00000108010	0.284209	0.288248	-27952
GSDMB	ENSG00000073605	-0.0199362	0.104733	-2168
H3F3C	ENSG00000188375	-0.141997	-0.1172	-83156
HIST4H4	ENSG00000197837	-0.175675	-0.195114	1867
IL22RA1	ENSG00000142677	0.0185626	0.0533833	-11693
IL31RA	ENSG00000164509	-0.0195309	-0.0195309	50109
IL4I1	ENSG00000104951	0.188216	0.205461	-750
ITGAM	ENSG00000169896	0.433603	0.407653	5432
ITM2B	ENSG00000136156	0.286236	0.343491	-25704
JADE2	ENSG00000043143	-0.308193	-0.222004	28713
KAZN	ENSG00000189337	0.20319	0.305863	19040
KLHL25	ENSG00000183655	0.452103	0.700827	-778
LAMC2	ENSG00000058085	0.0929998	0.0212976	-4980
LHX2	ENSG00000106689	1.29618	1.83304	-14683
MAFF	ENSG00000185022	0.341611	0.388284	15616
MAP4K4	ENSG00000071054	0.278209	0.286356	-101107
MAST4	ENSG00000069020	0.0487328	0.219489	68805
MEIS1	ENSG00000143995	0.00937597	-0.0106422	-367275
MYO18A	ENSG00000196535	0.0110482	-0.0943013	-9196
NEURL3	ENSG00000163121	0.0353407	0.0895741	0
NFE2L3	ENSG00000050344	0.716985	0.830221	4168
NRARP	ENSG00000198435	0.380131	0.419975	2899
NXN	ENSG00000167693	-0.156529	-0.370471	-4027
PDGFA	ENSG00000197461	0.0416799	-0.0499998	66792
PELI1	ENSG00000197329	0.320671	0.433394	-59796
PLEKHG1	ENSG00000120278	-0.0889032	-0.0432054	-154607
PPARGC1B	ENSG00000155846	0.0244302	0.156743	8925
PPP1R14C	ENSG00000198729	0.38544	0.622778	-1580
PPP2CA	ENSG00000113575	0.231008	0.315092	-58152
PSMB9	ENSG00000240065	0.514048	0.490439	7054
PTGES	ENSG00000148344	4.27031	5.55985	539
PTP4A3	ENSG00000184489	0.637432	0.519998	-15007
RAP1GAP	ENSG00000076864	-0.213497	-0.348991	47073
RASGEF1B	ENSG00000138670	0.14735	0.218499	-78112
RBFA	ENSG00000101546	0.13731	0.0336371	14756
RBM33	ENSG00000184863	0.240893	0.321272	37497
ROR1	ENSG00000185483	-0.121043	-0.14515	-42222
SERTAD2	ENSG00000179833	0.352332	0.476959	-45913
SERTAD4	ENSG00000082497	-0.0206545	0.464529	-19148
SH2B3	ENSG00000111252	0.304841	0.468777	-1147
SLC25A22	ENSG00000177542	0.421948	0.514409	1038
SLCO3A1	ENSG00000176463	0.327514	0.367771	99819
SNX11	ENSG00000002919	0.202632	0.27034	4211
SOX1	ENSG00000182968	-0.0175771	-0.0175771	58025
SOX17	ENSG00000164736	0	0	-129406
SPTBN1	ENSG00000115306	-0.116737	-0.0108579	71574
SSTR2	ENSG00000180616	2.08802	2.41224	1872
SSUH2	ENSG00000125046	-0.215998	-0.00517623	-30920
SUMO1	ENSG00000116030	0.0582494	-0.0130976	65323
SYNPO	ENSG00000171992	-0.104007	-0.162109	-719
TCF20	ENSG00000100207	0.173681	0.214575	9616
TEX261	ENSG00000144043	-0.0935925	-0.121118	-28763
TFAP2A	ENSG00000137203	0.138326	0.236022	56694
TLE3	ENSG00000140332	0.0384908	0.0244816	-42675
TMEM52B	ENSG00000165685	0.505928	0.504173	873
TNF	ENSG00000232810	3.25163	3.7138	2745
TNFAIP3	ENSG00000118503	3.2355	3.26869	6201
TNFRSF4	ENSG00000186827	-0.0749191	-0.0264232	-973
TNFRSF6B	ENSG00000243509	0	0	2251
TNFRSF9	ENSG00000049249	1.8588	1.81039	2110
TNIP1	ENSG00000145901	0.667535	0.680752	0
TNS3	ENSG00000136205	0.0538855	0.205463	53079
TRAF1	ENSG00000056558	0.0888577	0.194865	583
TRAF2	ENSG00000127191	0.266715	0.364954	15948
TRIM47	ENSG00000132481	1.55953	1.57223	1142
USP45	ENSG00000123552	0.0690347	0.271079	13312
XIAP	ENSG00000101966	0.156337	0.265723	-39958
YPEL5	ENSG00000119801	1.00058	1.01346	8428
ZNF688	ENSG00000229809	0.0368527	-0.227493	4881
ZNF696	ENSG00000185730	0.0714053	0.153267	-5841
ZNRF4	ENSG00000105428	0	0	2530
