# Supplementary material for: Sustained TNF-α stimulation leads to transcriptional memory that greatly enhances signal sensitivity and robustness
Source: eLife. 2020 Nov 6;9:e61965. doi: 10.7554/eLife.61965 (PMC7704108; doi:10.7554/eLife.61965)
Supplement: Figure 7—source data 1. [file elife-61965-fig7-data1.xlsx]

## Sheet: Sheet1
	0 ng/mL		0.4 ng/mL		2 ng/mL		10 ng/mL		50 ng/mL
0 d TNF-α	1.0341	0.9663	5.1591	5.3069	12.6991	12.1384	17.0876	19.2823	21.7719	22.0659
12 d TNF-α+10 d	4.5584	4.9641	42.4166	41.3266	64.0523	61.0902	73.786	76.9933	83.0388	85.947
