# Supplementary material for: Sustained TNF-α stimulation leads to transcriptional memory that greatly enhances signal sensitivity and robustness
Source: eLife journal article supplement (doi:10.7554/elife.61965), 2020-11-06

**Figure 2—figure supplement 1**

**A**

| Gene         | FPKM of various treatments |                    |                           |                                                |
|--------------|----------------------------|--------------------|---------------------------|------------------------------------------------|
|              | 0 h TNF- $\alpha$          | 12 h TNF- $\alpha$ | 12 d TNF- $\alpha$ + 10 d | 12 d TNF- $\alpha$ + 10 d + 12 h TNF- $\alpha$ |
| <i>EGFP</i>  | 3.3                        | 164.0              | 20.0                      | 794.0                                          |
| <i>CALCB</i> | 5.7                        | 92.8               | 41.4                      | 346.3                                          |
| <i>PTGES</i> | 0.1                        | 11.8               | 1.3                       | 29.6                                           |
| <i>LHX2</i>  | 1.9                        | 5.4                | 2.3                       | 8.0                                            |
| <i>CCL2</i>  | 0.0                        | 4.6                | 0.1                       | 6.3                                            |
| <i>TNF</i>   | 0.0                        | 4.3                | 0.0                       | 6.1                                            |
| <i>IL32</i>  | 0.4                        | 33.3               | 3.5                       | 29.1                                           |

**B**

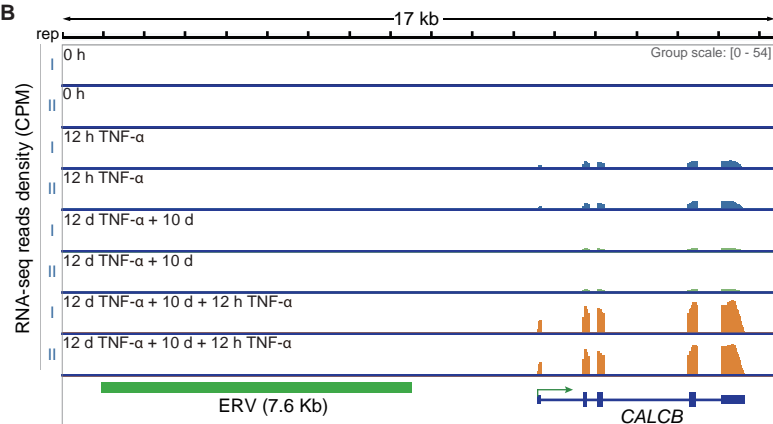

**C**

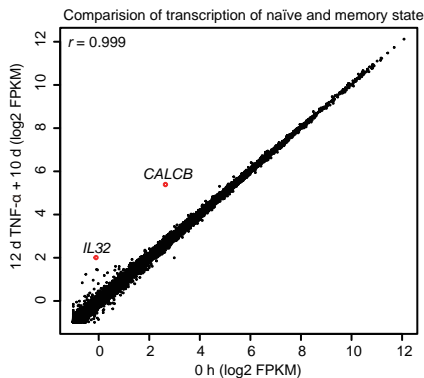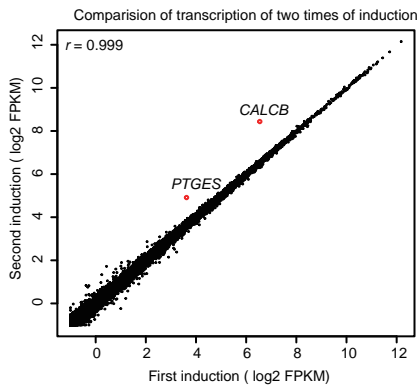

Supplement: supp [file elife_poa_e61965_Figure_2_figure_supplement_1.pdf › elife_poa_e61965_Figure_2_figure_supplement_1.pdf]
