# Supplementary material for: Sustained TNF-α stimulation leads to transcriptional memory that greatly enhances signal sensitivity and robustness
Source: eLife journal article supplement (doi:10.7554/elife.61965), 2020-11-06

**Figure 3—figure supplement 1**

**A**

| Treatments                                     | <i>CALCA</i> FPKM<br>by RNA-seq |
|------------------------------------------------|---------------------------------|
| 0 h TNF- $\alpha$                              | 0.000                           |
| 12 h TNF- $\alpha$                             | 0.027                           |
| 12 d TNF- $\alpha$ + 10 d                      | 0.062                           |
| 12 d TNF- $\alpha$ + 10 d + 12 h TNF- $\alpha$ | 0.238                           |

**B**

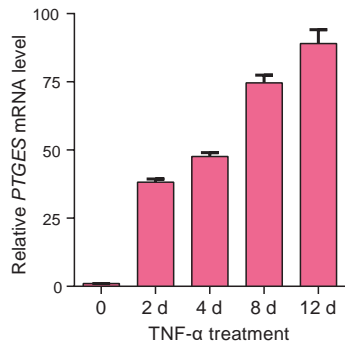

**C**

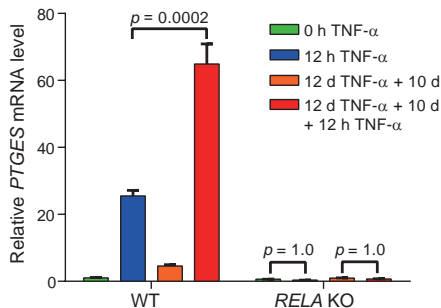

**D**

*CALCB* Promoter (-188 ~ +116)

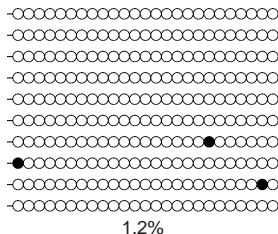

Supplement: supp [file elife_poa_e61965_Figure_3_figure_supplement_1.pdf › elife_poa_e61965_Figure_3_figure_supplement_1.pdf]
