# Supplementary material for: Sustained TNF-α stimulation leads to transcriptional memory that greatly enhances signal sensitivity and robustness
Source: eLife journal article supplement (doi:10.7554/elife.61965), 2020-11-06

**Figure 5—figure supplement 2**

**A**

**MER11B left+right KO cell validation**

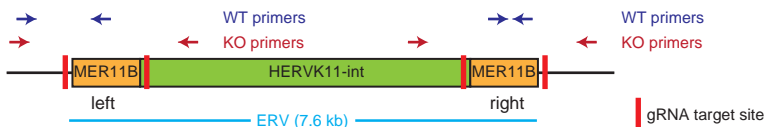

**MER11B-left KO validation**

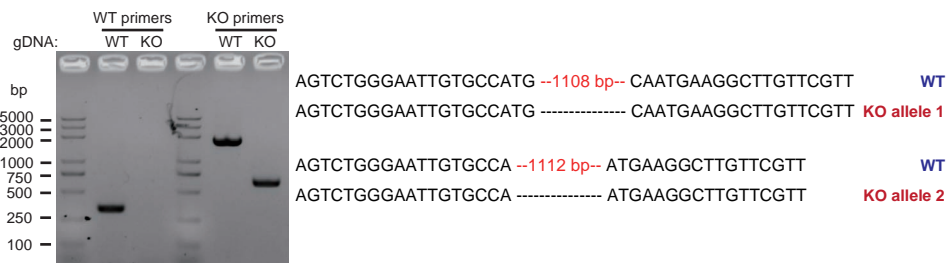

**MER11B-right KO validation**

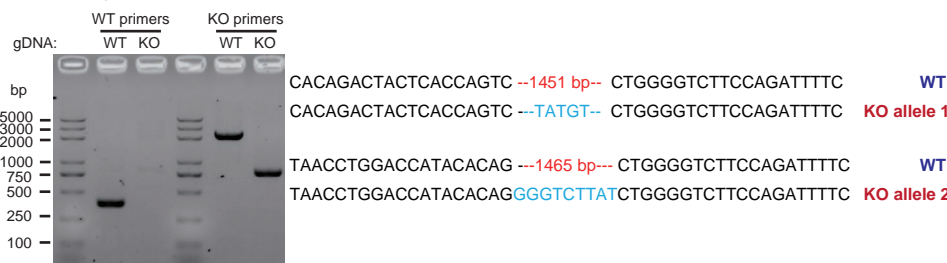

**B**

**ERV KO cell validation**

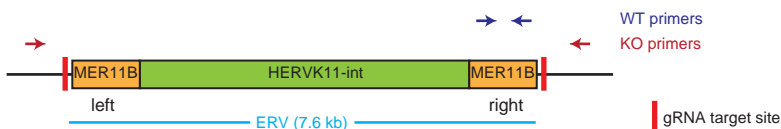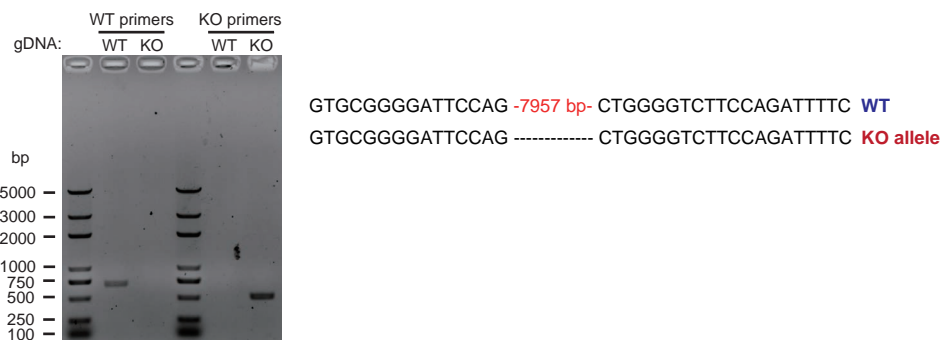

Supplement: supp [file elife_poa_e61965_Figure_5_figure_supplement_2.pdf › elife_poa_e61965_Figure_5_figure_supplement_2.pdf]
