# Supplementary material for: Sustained TNF-α stimulation leads to transcriptional memory that greatly enhances signal sensitivity and robustness
Source: eLife. 2020 Nov 6;9:e61965. doi: 10.7554/eLife.61965 (PMC7704108; doi:10.7554/eLife.61965)
Supplement: Supplementary file 3. — Sheet 1: Basic QC stats for mRNA-seq experiments; Sheet 2: List of differentially expressed genes and FPKM values. Two replicates are shown; Sheet 3: Basic QC stats for WGBS experiments; Sheet 4: Differentially methylated regions (DMRs) between cells treated with 12 days TNF-α vs. 0 hr TNF-α cells; Sheet 5: DMRs between cells treated with 12 days TNF-α vs. 0 hr TNF-α RELA KO cells; Sheet 6: DMRs between cells treated with 12 days TNF-α vs. 0 hr TNF-α TET2 KO cells; Sheet 7: Basic QC stats for ChIP-seq experiments; Sheet 8: Read counts of p65 peaks in various treated samples, normalized in reads per million per kb peak; Sheet 9: Basic QC stats for ATAC-seq experiments. [file elife-61965-supp3.xlsx]

## Sheet: mRNA-seq
RNA-seq samples	Raw read pairs	uniquely mapped	%	genes with RPKM>0.5
non-treated control RNA-seq, rep1	32535074	30662745	94.3	14758
non-treated control RNA-seq, rep2	32802762	30916342	94.3	14756
12h-TNFa treatment RNAseq, rep1	31388250	29599513	94.3	14627
12h-TNFa treatment RNAseq, rep2	32056179	30249190	94.4	14596
12d-TNFa treatment RNAseq, rep1	32084182	30184201	94.1	14760
12d-TNFa treatment RNAseq, rep2	34305745	32314643	94.2	14765
12d-TNFa treatment+withdraw-10d, RNA-seq, rep1	32817259	30801038	93.9	14698
12d-TNFa treatment+withdraw-10d, RNA-seq, rep2	31768492	29840109	93.9	14731
12d-TNFa treatment+withdraw-10d+12h TNFa, RNA-seq, rep1	33145299	31165947	94	14628
12d-TNFa treatment+withdraw-10d+12h TNFa, RNA-seq, rep2	31891171	30072962	94.3	14559
non-treated control RNA-seq for high-low comparison, rep1	20510447	19491560	95	14382
non-treated control RNA-seq for high-low comparison, rep2	20436098	19408836	95	14415
12h-low-TNFa treatment RNAseq, rep1	20306594	19311127	95.1	14498
12h-low-TNFa treatment RNAseq, rep2	20504387	19479205	95	14514
12h-high-TNFa treatment RNAseq, rep1	20142049	19132020	95	14536
12h-high-TNFa treatment RNAseq, rep2	20398584	19367620	95	14470
12d-TNFa +withdraw-10d for high-low comparison, RNA-seq, rep1	20433607	19392095	94.9	14561
12d-TNFa +withdraw-10d for high-low comparison, RNA-seq, rep2	20599721	19584163	95.1	14507
12h-low-TNFa after pretreatment, RNAseq, rep1	20438550	19412593	95	14539
12h-low-TNFa after pretreatment, RNAseq, rep2	20736971	19737943	95.2	14333
12h-high-TNFa after pretreatment, RNAseq, rep1	20813728	19819158	95.2	14306
12h-high-TNFa after pretreatment, RNAseq, rep2	20668331	19599544	94.8	14470
non-treated WT RNA-seq, rep1	19041899	17961244	94.32	14610
non-treated WT RNA-seq, rep2	21225037	20178340	95.07	14471
9h-TNFa treated WT RNA-seq, rep1	30651569	28635498	93.42	14490
9h-TNFa treated WT RNA-seq, rep2	24606130	23188089	94.24	14443
12d-TNFa+withdraw-10d WT RNA-seq, rep1	26181362	24860396	94.95	14462
12d-TNFa+withdraw-10d WT RNA-seq, rep2	23623780	22296653	94.38	14534
12d-TNFa+withdraw-10d+TNFa-9h WT RNA-seq, rep1	22300686	21099094	94.61	14420
12d-TNFa+withdraw-10d+TNFa-9h WT RNA-seq, rep2	32394654	30590281	94.43	14509
non-treated Tet-TKO RNA-seq, rep1	22426318	21313500	95.04	14971
non-treated Tet-TKO RNA-seq, rep2	27225840	25783010	94.7	15031
9h-TNFa treated Tet-TKO RNA-seq, rep1	21762867	20266554	93.12	14994
9h-TNFa treated Tet-TKO RNA-seq, rep2	24237893	22774121	93.96	14942
12d-TNFa+withdraw-10d Tet-TKO RNA-seq, rep1	29254601	27574287	94.26	15104
12d-TNFa+withdraw-10d Tet-TKO RNA-seq, rep2	34111122	32256669	94.56	15022
12d-TNFa+withdraw-10d+TNFa-9h Tet-TKO RNA-seq, rep1	29642899	27805751	93.8	14975
12d-TNFa+withdraw-10d+TNFa-9h Tet-TKO RNA-seq, rep2	39991602	37695288	94.26	14751

## Sheet: DEGs_FPKM
gene_id	0h_rep1	0h_rep2	12h-TNF_rep1	12h-TNF_rep2	12d-TNF+10d_rep1	12d-TNF+10d_rep2	12d-TNF+10d+12hTNF_rep1	12d-TNF+10d+12hTNF_rep2
ENSG00000008517	0.633149	0.226142	31.6348	35.0389	4.0464	2.99753	28.9414	29.2022
ENSG00000021645	6.56734	6.2718	3.0956	3.24026	5.26816	5.01299	3.04441	2.66349
ENSG00000023445	0.473664	0.489874	4.5079	5.26407	0.508306	0.512678	5.0168	5.25105
ENSG00000026103	3.22574	2.89982	11.4697	11.8558	4.04562	4.7266	12.0918	12.2605
ENSG00000036448	25.3415	27.9448	11.1152	11.5697	24.4041	25.0118	9.97644	10.0779
ENSG00000041982	2.53478	2.4548	11.4584	13.1231	2.49522	2.37373	11.2768	11.4678
ENSG00000049249	0	0	1.14059	1.48646	0.00588541	0	1.20668	1.3007
ENSG00000057704	1.44008	1.35946	3.27761	3.10106	1.45451	1.43849	3.3519	3.42179
ENSG00000069399	1.0155	0.764268	3.54535	4.15626	0.894336	1.05434	3.69476	3.89017
ENSG00000077150	8.64197	7.60823	49.8536	49.8463	7.65725	8.60158	49.0874	48.3313
ENSG00000081041	0.173056	0.0858063	1.50139	1.72222	0.144228	0.257965	1.32189	1.03513
ENSG00000087495	1.60408	1.72547	0.782249	0.66005	1.98309	1.61179	0.685575	0.472101
ENSG00000090339	0	0.0975625	0.324754	0.337142	0.0395561	0.0828588	1.0473	1.49584
ENSG00000099860	4.8858	4.35946	13.1173	11.9906	5.48443	6.6224	13.1963	11.7695
ENSG00000100097	2.56083	1.86629	14.4162	13.1791	2.76343	1.86731	15.7142	14.7659
ENSG00000100906	9.67516	9.19629	113.514	107.298	11.0444	11.3621	109.849	107.434
ENSG00000104856	0.269134	0.640668	18.6021	18.8167	0.701342	0.575666	19.0178	18.2618
ENSG00000104953	1.28145	1.51261	0.520041	0.602487	0.818973	1.17052	0.377202	0.459356
ENSG00000105499	0.119273	0.379011	1.69607	2.22485	0.220901	0.110548	2.5387	1.92046
ENSG00000105825	1.47297	0.842021	3.52101	4.56109	1.07817	1.4926	3.40561	3.71993
ENSG00000106665	0.554082	0.633543	2.27568	2.09348	0.606848	0.547109	2.08593	1.91573
ENSG00000106689	2.05006	1.7339	5.36837	5.37994	2.64927	1.97023	8.57722	7.46746
ENSG00000107968	1.04659	1.45168	3.56021	3.97409	1.48667	1.23391	3.55428	3.78973
ENSG00000108691	0.0474094	0	4.85049	4.42636	0.237072	0.0488552	6.37006	6.28215
ENSG00000108932	0.546685	0.507294	3.70093	3.79883	0.563801	0.462396	3.35415	3.65063
ENSG00000108984	3.14408	3.12646	0.725629	0.957114	3.00418	3.31183	0.636981	0.898465
ENSG00000109320	10.3241	8.76636	21.9057	21.4174	8.52607	8.13969	21.8109	23.1779
ENSG00000111331	1.04043	1.0805	4.03967	3.54781	1.53314	1.65823	4.7205	4.66373
ENSG00000112149	2.75041	3.26194	18.4838	19.1731	2.75302	3.14992	18.1334	17.792
ENSG00000113504	3.43027	3.80094	31.3008	29.4805	3.54001	3.67269	24.4975	23.7069
ENSG00000115009	0	0.0512306	6.04891	7.97276	0	0	3.79057	4.06583
ENSG00000115461	10.4515	10.2298	3.42315	3.31143	9.80247	9.82008	3.54686	3.61383
ENSG00000118503	0.770381	0.937962	12.0751	12.4335	1.18874	0.909629	12.3847	12.7176
ENSG00000119698	0.621441	0.752185	1.25336	1.35657	0.771032	0.843259	2.21348	2.18558
ENSG00000119801	6.13938	5.69969	12.5162	12.1722	6.53498	6.48729	12.1341	12.7847
ENSG00000123240	5.03557	4.62735	12.9738	14.0604	5.56309	5.37054	12.9686	14.9397
ENSG00000124145	3.58967	3.9597	30.6319	31.3107	4.12788	4.0455	32.5876	33.577
ENSG00000124875	0.388519	0.385279	1.27732	1.51858	0.388576	0.273936	1.33017	1.40285
ENSG00000125347	2.7398	2.8039	13.5949	13.1831	3.38303	3.28269	13.973	13.3032
ENSG00000125398	1.24987	1.0978	3.03411	3.33328	1.32143	1.39839	3.18964	3.54443
ENSG00000125845	1.1902	1.52855	3.50144	3.69276	1.3757	1.62862	3.88578	4.59306
ENSG00000131650	0.8613	0.57645	2.6151	2.5722	0.903974	0.732222	2.2587	2.39776
ENSG00000132481	1.89078	2.31552	7.36253	6.98341	2.5597	2.32915	7.63143	6.85023
ENSG00000134070	1.89621	1.66035	5.55291	5.15984	1.77536	1.49671	6.05641	6.5517
ENSG00000134352	7.67501	7.41576	16.1756	13.7164	7.42913	7.58418	16.2162	16.6945
ENSG00000135604	0.674882	0.470286	2.3753	1.78721	0.711436	0.375926	2.50082	2.04736
ENSG00000137312	35.7858	36.7106	16.4282	18.1111	36.0717	35.9959	17.5561	16.5087
ENSG00000137331	8.11863	8.74328	88.7366	86.2924	9.69809	9.94522	83.1557	77.0056
ENSG00000137868	0.86852	0.830881	3.10421	3.02728	1.45083	1.0085	4.15479	3.73425
ENSG00000137936	2.18645	2.54992	5.04003	5.02246	2.53563	2.24563	5.07458	5.70363
ENSG00000142227	1.88521	2.09352	11.9966	12.2414	2.88384	2.75275	12.0795	9.22583
ENSG00000144681	1.07103	1.11144	1.54357	1.47854	2.45015	2.62069	2.85543	2.79153
ENSG00000145365	6.53685	6.5115	19.3324	17.4994	6.47293	5.71205	18.9363	20.4595
ENSG00000148344	0.198029	0.078548	12.0605	11.5738	1.48537	1.10197	30.3162	28.9021
ENSG00000149557	1.84582	1.56502	5.12284	5.1591	2.14755	1.74283	4.96947	4.44873
ENSG00000150687	14.9897	15.1722	6.68525	7.03182	13.7929	11.8426	6.04086	8.27159
ENSG00000154265	3.52493	4.43759	10.5648	11.1889	3.83813	3.55694	9.02253	9.65623
ENSG00000154553	7.76105	7.73461	14.2555	14.8288	9.96693	10.1843	17.6013	16.3552
ENSG00000154645	2.15979	2.55954	6.37035	6.4164	2.30289	2.47217	6.09669	6.03106
ENSG00000154721	1.00608	1.08049	4.21511	4.40017	0.864525	0.794959	3.77091	4.36379
ENSG00000158286	1.9168	1.73732	5.77268	6.08985	1.45336	2.17945	6.88229	5.86807
ENSG00000160326	5.9897	5.35956	13.8683	14.7539	6.06293	6.03205	14.2166	12.4668
ENSG00000161405	2.44618	2.48338	5.09644	4.95346	2.45687	2.46413	5.86184	5.89072
ENSG00000163082	6.40265	6.61032	20.5703	19.6481	6.34013	6.40258	18.0951	19.0874
ENSG00000163132	12.6399	11.5526	39.6349	39.0783	15.7279	15.7604	42.4366	39.7715
ENSG00000163734	0.299904	0.8637	2.46058	3.10368	0.588407	0.409844	2.97603	2.3811
ENSG00000163735	0	0	1.14307	1.15638	0.0138432	0	2.17483	2.22981
ENSG00000163739	0.128096	0.121384	5.4248	5.58201	0.182703	0.132003	4.67912	5.22699
ENSG00000164176	1.2817	1.19736	3.22546	3.47755	1.45692	1.741	4.20658	4.47725
ENSG00000164236	1.61734	1.71002	4.95963	4.80517	1.70496	1.69031	4.97404	4.9707
ENSG00000164308	2.81014	2.95164	6.26051	6.75568	3.21431	3.0679	6.57949	7.41321
ENSG00000165449	2.22972	1.93934	7.69592	9.3898	2.2906	2.17014	7.73822	8.17943
ENSG00000165507	2.58506	2.7114	9.10584	8.67717	2.68477	2.6121	4.65963	4.75837
ENSG00000165801	1.46227	1.47017	6.09632	6.89083	1.42935	1.47671	6.28867	5.39258
ENSG00000166526	12.9489	12.6277	21.1143	22.7404	13.9724	13.9905	27.1059	27.7335
ENSG00000168394	9.25447	9.38607	25.2479	25.0904	11.2952	10.1652	26.603	24.8602
ENSG00000169242	4.09363	3.28513	17.0522	18.5639	4.70985	4.80178	21.9335	20.6099
ENSG00000169245	0	0	8.19149	8.34968	0.0298758	0	7.47395	7.10977
ENSG00000169429	0	0.0408649	3.04262	3.22223	0.0715765	0.150207	2.33868	2.22508
ENSG00000170099	0.04886	0	0.568559	0.313966	0.0488651	0.0953494	0.890278	0.779671
ENSG00000170231	0.0798398	0	0.338125	0.576439	0.0456879	0.0822761	0.948938	0.497881
ENSG00000170439	4.33118	4.29669	2.11606	2.1407	4.33089	3.93582	1.94893	1.83867
ENSG00000171223	6.42772	6.79522	34.8232	32.668	6.58064	6.14366	30.3088	26.7014
ENSG00000171227	2.14562	1.91939	0.748191	0.772773	2.43081	2.13807	0.68732	0.648898
ENSG00000173918	4.37618	4.26551	16.2741	16.5838	5.11611	5.11817	15.3228	14.3862
ENSG00000175868	5.82989	5.62963	90.7635	94.7915	42.4876	40.3466	357.024	335.507
ENSG00000176971	0.362542	0.269639	1.20909	1.51439	0.489483	0.466998	1.10661	1.20574
ENSG00000179750	0.993625	1.03238	1.88641	2.03734	1.77726	1.54248	2.99458	2.83504
ENSG00000180616	0.370371	0.326473	3.0782	3.13616	0.465436	0.600575	4.23127	3.80105
ENSG00000182759	5.19396	4.54207	11.0932	9.69515	6.22742	6.21614	12.9874	11.8386
ENSG00000184371	1.26416	1.2691	5.80665	5.95562	1.6124	1.50102	6.26656	5.56982
ENSG00000185101	0.0244981	0.0488138	1.36351	1.73763	0.0768376	0.11973	2.60425	2.54362
ENSG00000187595	1.30824	1.17247	2.62668	3.00073	1.40584	1.3053	3.5234	3.10269
ENSG00000187634	22.1222	22.8879	9.40016	10.1245	22.228	25.021	11.2328	8.51493
ENSG00000188487	0.307944	0.217988	0.798542	0.572966	0.600815	0.357015	2.21763	1.82648
ENSG00000198535	0.917774	0.889895	8.37805	8.43515	1.14224	1.17695	8.25614	8.16073
ENSG00000198759	0	0	0.574687	0.499539	0.0146914	0	0.485317	0.441894
ENSG00000204389	584.403	656.561	343.146	354.36	598.662	536.326	310.826	276.952
ENSG00000204580	10.8257	10.3957	39.7161	37.2417	11.5376	12.7491	37.0792	36.8591
ENSG00000204642	4.45709	4.55603	12.3056	9.74514	4.68046	4.88717	9.30911	9.52045
ENSG00000213886	0.0323187	0	25.2926	23.7666	0	0.0666126	21.1204	17.903
ENSG00000215910	0.934022	1.01186	0.387058	0.0720284	0.507039	0.0475587	0.0423113	0.218373
ENSG00000227507	0	0.0752979	0.746215	0.83535	0.0253127	0	0.661596	0.40079
ENSG00000231925	5.87306	5.85407	42.7797	43.474	5.60689	6.06152	41.6378	39.6198
ENSG00000232810	0	0	4.4384	4.08598	0.041926	0.0432001	6.56581	5.55512
ENSG00000237988	0	0	2.04017	1.8346	0	0	1.63178	1.42502
ENSG00000243207	0.409097	0	0.861299	0.844785	1.94333	1.75551	2.03505	3.55167
ENSG00000254692	0.520931	0.0699974	3.01051	0.00181848	0	0.887292	0	0.69382
ENSG00000256514	0.503118	0.432798	0	0.83681	1.65722	2.76396	0.714535	0.814305
ENSG00000257767	2.39706	1.98416	0.723826	0.770529	1.16879	1.302	1.60875	0.777039
ENSG00000259112	0.112531	1.22513	2.27688	0.817078	1.56242	1.96971	3.84763	2.59747
ENSG00000259132	1.70404	2.12482	0.795692	1.50323	1.32858	1.62359	0.985035	0
ENSG00000259332	1.92394	1.94967	1.98498	1.6198	2.19064	2.314	0.451826	0.896544
ENSG00000260537	1.36577	1.10061	0.532122	0.00315576	1.92067	0.29367	0.928707	1.63845
ENSG00000267059	0.166202	0	0.660264	0	0.17604	0.216788	1.11828	0.554658
ENSG00000268173	0.504082	0.387792	1.00184	1.18882	0.634161	3.85555	1.4632	0.00720772
ENSG00000272617	0	0.722436	1.56808	1.1193	1.49384	1.40086	0.842147	0.891075

## Sheet: WGBS_QC
WGBS samples	Raw read pairs	Uniquely mapped	%	Conversion rate	Covered CpG sites	CG sites with cov>=5
WGBS of non-treated HEK 293	255176167	201871795	0.791108	0.99863	56337972	47292058
WGBS of 12d-TNFa treated HEK 293 cells	242221594	118227673	0.488097	0.996468	54219765	24940318
WGBS of non-treated HEK 293 with RELA KO	204652205	88188507	0.430919	0.995781	51823233	14520049
WGBS of 12d-TNFa treated HEK 293 cells with RELA KO	184239738	90536087	0.491404	0.996648	52820320	17257196
WGBS of non-treated HEK 293 with TET2 KO	363857091	295011015	0.810788	0.998714	56806170	53216487
WGBS of 12d-TNFa treated HEK 293 cells with TET2 KO	415132161	323874344	0.780172	0.998871	56858791	53584482

## Sheet: DMR.TNF12d.vs.0h
chr	start	end	length	nCG	meanMethy1	meanMethy2	diff.Methy	areaStat	p65_peak_chr	p65_peak_start	p65_peak_end
chrUn_GL000220v1	115398	115673	276	96	0.253611	0.732301	-0.47869	-355.333	.	-1	-1
chr9	136902352	136902992	641	36	0.860923	0.132951	0.727971	306.472	chr9	136902460	136902730
chrUn_GL000220v1	110974	111351	378	73	0.33505	0.788128	-0.453078	-272.312	.	-1	-1
chr9	123996516	123997223	708	46	0.822439	0.199712	0.622727	269.187	chr9	123996705	123996927
chr21	8389596	8389951	356	54	0.79985	0.208304	0.591545	266.736	.	-1	-1
chr17	81422631	81423567	937	66	0.875816	0.449619	0.426197	245.574	.	-1	-1
chr22_KI270733v1_random	177333	177606	274	48	0.156716	0.764184	-0.607468	-241.675	.	-1	-1
chrX	133985661	133985857	197	69	0.454667	0.0938377	0.36083	230.663	.	-1	-1
chr20	21100774	21101111	338	56	0.340414	0.796867	-0.456453	-222.435	.	-1	-1
chr20	37890587	37891115	529	32	0.815702	0.144966	0.670736	206.219	.	-1	-1
chr22	38218492	38219058	567	46	0.844701	0.339662	0.505039	203.414	chr22	38218635	38218905
chr21	8401729	8402015	287	41	0.845872	0.239503	0.606369	200.439	.	-1	-1
chr21	8433787	8434113	327	49	0.70329	0.192636	0.510653	194.33	.	-1	-1
chr1	161441907	161442240	334	53	0.706211	0.281496	0.424716	183.624	.	-1	-1
chr21	8438703	8439009	307	53	0.366463	0.790606	-0.424142	-178.442	.	-1	-1
chr1	161449768	161450201	434	35	0.84748	0.207916	0.639564	177.67	.	-1	-1
chr14	94346021	94346546	526	48	0.636531	0.211875	0.424657	165.774	chr14	94345889	94346734
chr9	78236407	78236814	408	44	0.0503943	0.453068	-0.402673	-164.788	.	-1	-1
chr1_KI270712v1_random	3631	3804	174	46	0.20964	0.656879	-0.447239	-164.267	.	-1	-1
chr2	64204081	64204454	374	24	0.900179	0.203154	0.697025	163.471	chr2	64204267	64204553
chr4	78252608	78253363	756	26	0.746331	0.124819	0.621512	162.128	chr4	78252804	78253125
chr20	20872355	20872937	583	22	0.91044	0.197183	0.713257	158.583	chr20	20872567	20872788
chr6	137872772	137873729	958	16	0.873602	0.0803436	0.793258	156.128	chr6	137873388	137873687
chr1	155124678	155125176	499	22	0.819975	0.126807	0.693168	155.15	chr1	155124495	155124986
chrX	2401482	2402181	700	38	0.700854	0.22372	0.477134	155.067	.	-1	-1
chr1	145506015	145506403	389	30	0.146041	0.737184	-0.591143	-151.501	.	-1	-1
chr15	70140393	70141002	610	21	0.856197	0.16418	0.692018	151.209	chr15	70140592	70141033
chr17	185820	186216	397	26	0.86293	0.254597	0.608333	147.043	.	-1	-1
chr9	129752242	129752586	345	36	0.741118	0.266008	0.475111	146.6	chr9	129752334	129752527
chr21	44785984	44786493	510	30	0.663698	0.136766	0.526932	144.056	chr21	44785670	44785998
chr12	124548899	124549258	360	32	0.850499	0.350741	0.499758	137.51	.	-1	-1
chr19	49897703	49898194	492	33	0.811972	0.316766	0.495205	137.076	chr19	49897640	49898019
chr9	35605452	35605615	164	38	0.0398814	0.385581	-0.345699	-136.249	.	-1	-1
chr10	124095057	124095602	546	21	0.843716	0.199076	0.64464	134.508	chr10	124095258	124095483
chr11	15062738	15063466	729	34	0.718273	0.256628	0.461645	131.199	chr11	15062715	15063490
chr5	151141473	151141913	441	33	0.797756	0.326173	0.471583	130.12	.	-1	-1
chr10	127346528	127347010	483	34	0.84501	0.374209	0.470801	128.469	chr10	127346743	127346943
chr1	111192793	111193369	577	20	0.802571	0.129825	0.672746	127.488	chr1	111192793	111193253
chr1	203180358	203180997	640	24	0.801314	0.21496	0.586354	126.977	.	-1	-1
chr7	452853	453225	373	30	0.798039	0.309552	0.488486	124.125	chr7	452876	453053
chr9	38318904	38319357	454	24	0.779117	0.189509	0.589609	122.164	chr9	38319117	38319324
chr5	151086850	151087343	494	23	0.892752	0.3029	0.589851	121.623	chr5	151087099	151087350
chr1	37476744	37477708	965	22	0.813637	0.217455	0.596181	121.021	.	-1	-1
chr9	121286003	121286485	483	30	0.641134	0.179795	0.461339	120.513	.	-1	-1
chr3	55607856	55608785	930	30	0.856344	0.364021	0.492324	120.332	chr3	55607813	55608142
chr8	122970396	122971019	624	22	0.800953	0.198387	0.602566	119.646	chr8	122970600	122970893
chr12	26272037	26272393	357	26	0.846753	0.311818	0.534935	116.39	.	-1	-1
chr5	55903458	55903823	366	23	0.827177	0.246148	0.581028	115.316	chr5	55903430	55903607
chr17	79140866	79141232	367	20	0.840187	0.190757	0.64943	114.706	.	-1	-1
chr4	75940693	75940825	133	34	0.370675	0.746583	-0.375909	-110.982	.	-1	-1
chr16	31265293	31265727	435	22	0.833185	0.268257	0.564928	109.816	chr16	31265398	31265698
chr13	29743206	29743581	376	30	0.55021	0.135327	0.414883	109.802	chr13	29743502	29743847
chr4	112073053	112073695	643	18	0.772976	0.125855	0.647121	109.758	chr4	112073317	112073641
chr11	107931037	107931462	426	26	0.817676	0.310942	0.506734	109.262	.	-1	-1
chr7	47528671	47529177	507	24	0.773573	0.25754	0.516033	105.078	chr7	47528759	47529066
chr21	8206534	8207886	1353	134	0.421561	0.517436	-0.0958755	-104.699	.	-1	-1
chr6	11806458	11806901	444	25	0.815912	0.310012	0.505899	104.537	chr6	11806634	11806810
chr10	103678250	103678573	324	26	0.857963	0.36591	0.492054	103.678	chr10	103678246	103678416
chr9	35489796	35489887	92	29	0.0502036	0.400943	-0.350739	-101.673	.	-1	-1
chr10	44973566	44973922	357	24	0.887334	0.40031	0.487023	100.37	chr10	44973574	44973823
chr11	3095796	3096226	431	23	0.822452	0.297723	0.524729	99.9158	.	-1	-1
chr9	19788760	19788877	118	29	0.046194	0.388457	-0.342263	-99.6553	.	-1	-1
chr21	8212140	8212288	149	29	0.684852	0.249469	0.435384	99.3003	.	-1	-1
chr6	150141067	150141525	459	20	0.870802	0.328074	0.542728	98.9274	chr6	150141184	150141472
chr19	17931557	17932097	541	27	0.757382	0.322205	0.435176	98.6051	chr19	17931753	17931984
chr5	131379557	131380004	448	16	0.92707	0.260394	0.666676	98.2341	.	-1	-1
chr6	30882390	30882805	416	18	0.684033	0.112806	0.571226	98.0011	chr6	30882475	30882965
chrX	115867274	115867498	225	28	0.704504	0.221953	0.482551	97.9501	.	-1	-1
chr22	40274057	40274546	490	18	0.906421	0.321673	0.584748	97.2058	chr22	40274178	40274430
chr6	32861219	32861588	370	23	0.546046	0.0846618	0.461385	96.4748	chr6	32861214	32861467
chr10	3902400	3902668	269	12	0.947272	0.210933	0.736339	96.15	.	-1	-1
chr9	123997983	123998347	365	27	0.791129	0.331694	0.459436	96.0533	.	-1	-1
chr6	41297111	41297678	568	15	0.873994	0.206644	0.66735	95.8934	.	-1	-1
chr13	112125689	112125973	285	24	0.8953	0.445684	0.449616	95.5654	chr13	112125623	112125866
chr1	193408836	193409243	408	18	0.656264	0.0881891	0.568075	95.053	chr1	193408846	193409061
chr2	113503867	113504047	181	24	0.216716	0.683886	-0.46717	-94.7465	.	-1	-1
chr9	124010317	124010669	353	20	0.704591	0.196171	0.50842	92.7269	chr9	124010331	124010648
chr7	83983967	83984391	425	10	0.917303	0.120235	0.797067	92.4016	.	-1	-1
chr12	2357742	2358245	504	19	0.841033	0.271472	0.569561	92.2882	chr12	2358052	2358212
chr5	71219566	71219912	347	24	0.921928	0.451132	0.470796	91.7501	.	-1	-1
chr4	81549914	81550290	377	16	0.839004	0.187916	0.651088	91.5396	chr4	81550040	81550220
chr13	110359919	110360455	537	16	0.755094	0.137201	0.617892	90.5706	.	-1	-1
chr14	75540230	75540486	257	16	0.809912	0.17913	0.630782	90.3198	chr14	75540126	75540463
chr2	222423487	222423919	433	20	0.596427	0.0850791	0.511348	88.3105	chr2	222423615	222424046
chr6	35107224	35107650	427	20	0.710072	0.199777	0.510295	88.1073	chr6	35107267	35107437
chr5	177537856	177538154	299	23	0.804663	0.301264	0.503399	87.9847	chr5	177537799	177538052
chr12	13053504	13054110	607	22	0.698986	0.207802	0.491184	87.8437	chr12	13053579	13053959
chr2	238077155	238078250	1096	19	0.833075	0.309658	0.523417	87.7213	chr2	238077392	238077648
chr6	31578059	31578716	658	20	0.777433	0.241475	0.535958	87.62	chr6	31578311	31578751
chr17	32323986	32324468	483	21	0.76647	0.27897	0.4875	87.0117	.	-1	-1
chr1	210213543	210213737	195	18	0.907658	0.338661	0.568997	86.8812	chr1	210213436	210213702
chr15	76309927	76310201	275	24	0.527048	0.102081	0.424967	86.6568	.	-1	-1
chr7	74294394	74294764	371	25	0.82909	0.406225	0.422865	85.7057	.	-1	-1
chr17	4186595	4186797	203	17	0.794461	0.202469	0.591992	85.6527	chr17	4186433	4186690
chr3	10191958	10192527	570	20	0.688135	0.173074	0.515061	85.0847	chr3	10192166	10192419
chr17	48631277	48631728	452	22	0.865926	0.412568	0.453359	84.8753	.	-1	-1
chr3	172130443	172130778	336	22	0.652115	0.177226	0.474888	84.2885	.	-1	-1
chr18	49013214	49013681	468	21	0.830451	0.341179	0.489272	83.8362	.	-1	-1
chr7	70668551	70668970	420	16	0.857741	0.285314	0.572426	83.6566	chr7	70668623	70668896
chr9	41212039	41212210	172	24	0.841582	0.370153	0.471429	83.57	.	-1	-1
chr2	238064274	238064654	381	16	0.859763	0.248338	0.611426	83.1785	.	-1	-1
chr8	23335967	23336333	367	22	0.78985	0.336907	0.452942	83.016	.	-1	-1
chr10	130108107	130108439	333	18	0.86991	0.31989	0.550021	82.8044	chr10	130108147	130108423
chr17	77882557	77882981	425	20	0.726284	0.224405	0.501879	82.6865	.	-1	-1
chr10	79331827	79332117	291	14	0.872536	0.20466	0.667876	82.4479	chr10	79331803	79332051
chr20	45359635	45360087	453	17	0.779251	0.191294	0.587957	82.1171	chr20	45359782	45360019
chr18	48755059	48755450	392	12	0.91005	0.219342	0.690708	81.5982	chr18	48755251	48755411
chr8	37566814	37567254	441	18	0.819953	0.277001	0.542953	81.23	chr8	37566801	37567092
chr7	914338	914582	245	23	0.863842	0.45372	0.410123	80.8188	.	-1	-1
chr14	72153897	72154192	296	22	0.805338	0.344754	0.460584	80.2383	.	-1	-1
chr9	86508247	86508622	376	12	0.815474	0.116244	0.699231	79.277	.	-1	-1
chrX	100833194	100833448	255	24	0.78052	0.350204	0.430316	78.9793	.	-1	-1
chr11	111441543	111441797	255	16	0.848389	0.302952	0.545437	77.9106	.	-1	-1
chr11	15069633	15070164	532	20	0.74378	0.267835	0.475945	77.5003	chr11	15069741	15070022
chr2	133206753	133207044	292	14	0.845997	0.208842	0.637155	74.8738	.	-1	-1
chr9	88089617	88089908	292	16	0.65065	0.104851	0.545799	74.8004	.	-1	-1
chr2	106107515	106107863	349	22	0.873132	0.478869	0.394263	74.3596	chr2	106107593	106107838
chrUn_GL000213v1	142703	142914	212	17	0.15334	0.723431	-0.570091	-74.2756	.	-1	-1
chr7	28530670	28531364	695	20	0.738875	0.256759	0.482116	73.7895	chr7	28530910	28531228
chr9	124101957	124102218	262	19	0.865136	0.382557	0.482579	73.2016	chr9	124102071	124102296
chr1	7940803	7941073	271	16	0.694094	0.153014	0.54108	72.7361	chr1	7940809	7941056
chr13	65236980	65237445	466	14	0.706278	0.135051	0.571227	72.6757	chr13	65236952	65237306
chr22	39462582	39462972	391	20	0.720134	0.272604	0.44753	71.8789	.	-1	-1
chr1	198778260	198778527	268	12	0.749418	0.0908674	0.65855	71.7078	chr1	198778243	198778498
chr12	288914	289005	92	11	0.912853	0.154835	0.758018	71.2805	.	-1	-1
chr12	116537306	116537621	316	20	0.879329	0.462722	0.416607	71.2398	.	-1	-1
chr19	29459461	29459668	208	20	0.832053	0.305991	0.526061	70.1402	.	-1	-1
chr7	152043233	152043461	229	14	0.87126	0.312283	0.558977	69.6278	.	-1	-1
chr5	116454287	116454692	406	17	0.720428	0.22339	0.497038	69.5524	.	-1	-1
chr12	93573804	93574110	307	16	0.934705	0.442918	0.491787	69.3924	.	-1	-1
chr5	154479487	154479676	190	20	0.924684	0.517421	0.407262	68.9129	.	-1	-1
chr2	43174358	43174816	459	19	0.739794	0.279926	0.459869	68.5532	.	-1	-1
chr9	61854691	61854954	264	20	0.228133	0.714115	-0.485983	-68.351	.	-1	-1
chr22_KI270733v1_random	121017	121151	135	18	0.244169	0.815645	-0.571475	-68.1804	.	-1	-1
chr12	10179786	10180251	466	13	0.8501	0.260313	0.589787	67.8547	chr12	10179830	10180126
chr6	31575415	31575769	355	20	0.823717	0.408901	0.414816	67.3658	.	-1	-1
chr19	49786337	49786587	251	18	0.839601	0.345101	0.4945	67.3104	.	-1	-1
chr9	29383412	29383917	506	18	0.292096	0.797705	-0.505609	-67.1272	.	-1	-1
chr14	35402812	35403365	554	18	0.875255	0.421167	0.454087	67.0317	.	-1	-1
chr3	68821472	68821599	128	20	0.218784	0.67268	-0.453896	-66.8368	.	-1	-1
chr1	24154951	24155323	373	17	0.781619	0.29359	0.488029	66.773	chr1	24154978	24155401
chr20	53900603	53901262	660	18	0.765404	0.28487	0.480533	66.4365	.	-1	-1
chr6	19765024	19765157	134	16	0.872157	0.255821	0.616336	66.3224	.	-1	-1
chr17	73166777	73167348	572	14	0.862189	0.325349	0.53684	66.2762	chr17	73166892	73167194
chr3	79052039	79052474	436	18	0.624908	0.156159	0.468749	66.2325	chr3	79052154	79052476
chrX	142197036	142197296	261	19	0.191337	0.626562	-0.435225	-66.2116	.	-1	-1
chr3	23667618	23668271	654	11	0.750449	0.108961	0.641488	66.0535	.	-1	-1
chr5	175437624	175438029	406	14	0.77076	0.207216	0.563544	65.8671	.	-1	-1
chrUn_GL000220v1	160840	160937	98	19	0.0962646	0.652266	-0.556001	-65.8557	.	-1	-1
chr15	29555865	29556116	252	18	0.855742	0.3914	0.464342	65.5922	.	-1	-1
chr1	203429060	203429252	193	18	0.686876	0.197321	0.489555	65.5568	chr1	203428892	203429215
chrX	69027369	69027876	508	17	0.828154	0.359681	0.468473	65.3134	chrX	69027699	69028003
chr11	96338879	96339305	427	12	0.832361	0.251676	0.580685	65.1326	.	-1	-1
chr1	11168907	11169683	777	10	0.851081	0.16516	0.685921	65.0581	chr1	11169236	11169575
chr2	54629932	54630265	334	16	0.805867	0.310107	0.49576	65.0545	chr2	54629967	54630206
chr9	98993763	98993912	150	12	0.861704	0.229801	0.631903	64.5666	.	-1	-1
chr18	26169660	26169839	180	20	0.903752	0.494377	0.409375	64.2563	.	-1	-1
chrX	123814896	123815223	328	18	0.795724	0.346602	0.449122	64.2197	.	-1	-1
chr1	14921203	14921409	207	14	0.749964	0.189643	0.560321	64.1528	chr1	14921163	14921323
chr16	23145354	23145798	445	16	0.70214	0.178376	0.523764	64.1304	.	-1	-1
chr5	142226879	142226942	64	8	0.890312	0.118299	0.772013	63.2525	.	-1	-1
chr6	116283582	116283840	259	20	0.755347	0.313037	0.44231	62.7401	.	-1	-1
chr13	93244047	93244380	334	16	0.8396	0.380358	0.459242	62.511	.	-1	-1
chr6	44735625	44735937	313	14	0.779526	0.252542	0.526984	62.3403	chr6	44735624	44735918
chrX	23271256	23271529	274	16	0.429364	0.89683	-0.467466	-62.0448	.	-1	-1
chr13	26961891	26962235	345	16	0.666732	0.196232	0.4705	61.8433	.	-1	-1
chr12	11822380	11822590	211	16	0.867754	0.412062	0.455692	61.2426	.	-1	-1
chr6	99501424	99501883	460	14	0.781944	0.271131	0.510813	61.2154	chr6	99501780	99502065
chr15	92663428	92663579	152	16	0.888641	0.411548	0.477093	60.892	chr15	92663192	92663505
chr9	65316591	65316847	257	16	0.846361	0.292384	0.553977	60.8697	.	-1	-1
chr9	41643594	41643747	154	15	0.0464034	0.626454	-0.58005	-60.6189	.	-1	-1
chr12	11746172	11746590	419	15	0.872808	0.404733	0.468075	60.506	chr12	11746167	11746342
chr3	69248361	69248559	199	16	0.855308	0.376213	0.479094	60.0248	.	-1	-1
chr18	21903783	21904193	411	14	0.807953	0.255597	0.552357	59.7878	.	-1	-1
chr1	234987548	234987856	309	16	0.684091	0.215376	0.468715	59.7645	.	-1	-1
chr12	75706149	75706830	682	16	0.711752	0.228865	0.482887	59.6231	chr12	75706082	75706362
chr8	44487949	44488317	369	16	0.803166	0.220317	0.582849	59.5397	.	-1	-1
chr7	69651405	69651528	124	8	0.907074	0.1526	0.754474	58.9131	.	-1	-1
chr14	69519473	69519752	280	15	0.745848	0.28573	0.460118	57.8265	.	-1	-1
chr12	41709646	41709998	353	10	0.735889	0.106419	0.62947	57.7297	chr12	41709609	41710209
chr15	89101859	89102171	313	12	0.848602	0.301933	0.546669	57.7009	.	-1	-1
chr18	11996096	11996568	473	18	0.755362	0.32856	0.426803	57.6043	.	-1	-1
chr13	91348699	91348753	55	16	0.0319368	0.336882	-0.304945	-57.3742	.	-1	-1
chr3	72972957	72973480	524	10	0.781897	0.135601	0.646296	57.2608	chr3	72973106	72973595
chr4	182419763	182419924	162	14	0.970158	0.432318	0.53784	57.067	.	-1	-1
chr12	32252416	32252840	425	12	0.850762	0.311495	0.539268	56.9033	chr12	32252600	32252775
chr15	80419587	80419966	380	13	0.769292	0.252762	0.51653	56.861	chr15	80419700	80419894
chr5	64566780	64567199	420	12	0.850052	0.280227	0.569825	56.7803	chr5	64566579	64567075
chr9	60642361	60642463	103	10	0.936949	0.200243	0.736706	56.6717	.	-1	-1
chr1	154520471	154520553	83	6	0.95065	0.181101	0.769549	56.5915	.	-1	-1
chr4	85473896	85474261	366	17	0.498238	0.100265	0.397973	56.4548	.	-1	-1
chr1	8147195	8147609	415	14	0.889576	0.402305	0.487271	56.3176	.	-1	-1
chr12	36751605	36752525	921	16	0.90423	0.393563	0.510667	56.2989	.	-1	-1
chr6	16461634	16461862	229	12	0.794952	0.167593	0.62736	55.8999	.	-1	-1
chr6	4336856	4337036	181	9	0.778147	0.116013	0.662134	55.6689	chr6	4336821	4337081
chr20	51541428	51541752	325	13	0.695606	0.18998	0.505626	55.5007	.	-1	-1
chr6	41488591	41488958	368	15	0.687779	0.239989	0.44779	55.3966	.	-1	-1
chr10	39987213	39987426	214	12	0.92475	0.316962	0.607788	55.2516	.	-1	-1
chr3	93307593	93307788	196	12	0.902752	0.264761	0.637991	55.0931	.	-1	-1
chr6	132321453	132321812	360	12	0.833619	0.286479	0.54714	54.9521	.	-1	-1
chr13	40518610	40518807	198	8	0.84821	0.131154	0.717056	54.9336	.	-1	-1
chr3	161840383	161840563	181	7	0.0418157	0.887496	-0.84568	-54.9272	.	-1	-1
chr1	124667275	124667553	279	16	0.772715	0.330226	0.442489	54.7295	.	-1	-1
chr3	107987043	107987463	421	12	0.872738	0.320652	0.552087	54.582	.	-1	-1
chr16	37646879	37647304	426	14	0.856329	0.226872	0.629457	54.4377	.	-1	-1
chr3	183285904	183286072	169	14	0.755316	0.247414	0.507902	54.1319	.	-1	-1
chr2	232229376	232229554	179	10	0.888102	0.244726	0.643377	54.0652	.	-1	-1
chr9	45076459	45076705	247	15	0.881897	0.353397	0.528501	54.0183	.	-1	-1
chrX	119768536	119768760	225	16	0.839409	0.399704	0.439705	53.865	.	-1	-1
chr10	88993191	88994088	898	11	0.666216	0.124717	0.541499	53.6911	.	-1	-1
chr1	17582505	17582733	229	16	0.759191	0.317682	0.441509	53.2756	.	-1	-1
chr17	8837715	8837930	216	14	0.743224	0.237466	0.505759	53.1999	.	-1	-1
chr17	34235358	34236020	663	13	0.792593	0.24855	0.544043	53.13	chr17	34235477	34235902
chr10	36116526	36116910	385	14	0.734728	0.270848	0.46388	52.791	.	-1	-1
chr13	110815379	110815679	301	15	0.778623	0.335345	0.443277	52.7367	.	-1	-1
chr11	106986123	106986674	552	12	0.821303	0.296544	0.524759	52.4564	.	-1	-1
chr21	44171076	44171359	284	10	0.779301	0.135337	0.643964	52.4369	chr21	44170932	44171188
chr5	75617197	75617636	440	13	0.825482	0.34015	0.485332	52.4164	.	-1	-1
chr13	24274508	24274844	337	12	0.866737	0.317874	0.548863	52.254	.	-1	-1
chr6	3664729	3664991	263	15	0.828007	0.389568	0.43844	52.1267	.	-1	-1
chr9	45380185	45380287	103	10	0.244169	0.95387	-0.7097	-51.8302	.	-1	-1
chr20	24618338	24618564	227	15	0.844802	0.400335	0.444468	51.7932	.	-1	-1
chr6	21200384	21200700	317	10	0.883796	0.291028	0.592768	51.7455	chr6	21200562	21200815
chr9	129761589	129761888	300	14	0.81124	0.344248	0.466992	51.6968	.	-1	-1
chr13	42405827	42406067	241	14	0.93	0.498781	0.431219	51.6451	.	-1	-1
chr8	56199619	56199737	119	10	0.97854	0.394145	0.584396	51.4242	.	-1	-1
chr1	92723804	92724052	249	14	0.71656	0.25312	0.46344	51.2394	chr1	92723811	92724084
chr6	165658426	165658676	251	16	0.8031	0.388848	0.414252	51.2189	.	-1	-1
chr9	97511545	97512197	653	14	0.894484	0.435892	0.458592	50.9503	.	-1	-1
chr6	90315475	90315964	490	10	0.914453	0.369316	0.545137	50.8133	.	-1	-1
chr4	8194666	8195058	393	14	0.823142	0.384707	0.438436	50.7627	.	-1	-1
chr18	21911670	21911945	276	10	0.803956	0.19878	0.605176	50.7613	.	-1	-1
chr13	58955781	58956236	456	12	0.831191	0.330589	0.500602	50.6587	chr13	58955879	58956065
chr8	15569555	15569849	295	13	0.779785	0.286632	0.493153	50.3991	.	-1	-1
chr18	13223497	13223677	181	14	0.905687	0.48946	0.416227	50.3235	.	-1	-1
chr18	77568445	77568934	490	14	0.755855	0.308334	0.447521	50.3181	chr18	77568192	77568500
chr11	54133173	54133552	380	12	0.869169	0.257978	0.611191	50.2853	.	-1	-1
chr10	88995696	88995821	126	12	0.829847	0.31299	0.516857	49.9629	.	-1	-1
chr15	36529842	36529916	75	12	0.758938	0.204719	0.554219	49.8321	.	-1	-1
chr15	63556370	63556547	178	12	0.844246	0.317584	0.526662	49.7803	.	-1	-1
chr21	41601591	41601943	353	14	0.755102	0.257652	0.49745	49.5932	chr21	41601719	41602214
chr15	91948348	91948696	349	12	0.800336	0.302276	0.49806	49.469	.	-1	-1
chr2	11391764	11392115	352	13	0.657655	0.159351	0.498304	48.9966	.	-1	-1
chr6	38264464	38264768	305	14	0.812523	0.378411	0.434112	48.9252	.	-1	-1
chr11	128415500	128415891	392	10	0.889755	0.328999	0.560755	48.6635	.	-1	-1
chrX	13573098	13573324	227	12	0.610026	0.114789	0.495238	48.5719	chrX	13573083	13573265
chr11	111281772	111282104	333	12	0.774351	0.256314	0.518037	48.5624	.	-1	-1
chr18	58191402	58191989	588	8	0.784197	0.149713	0.634483	48.5457	chr18	58191636	58191944
chr14	35159775	35160182	408	13	0.563791	0.0974474	0.466344	48.5331	.	-1	-1
chr2	45820101	45820367	267	13	0.818421	0.343847	0.474574	48.3644	.	-1	-1
chr10	29865946	29866132	187	10	0.853957	0.254527	0.59943	48.3237	.	-1	-1
chr3	175274118	175274327	210	12	0.650236	0.15544	0.494796	48.3094	.	-1	-1
chr3	130446840	130447126	287	12	0.824403	0.344943	0.479461	48.2557	.	-1	-1
chr5	125041082	125041517	436	14	0.725366	0.27208	0.453286	48.2293	.	-1	-1
chr1	205324924	205325158	235	12	0.771733	0.25669	0.515042	48.1211	.	-1	-1
chr3	92072417	92072889	473	13	0.877212	0.372535	0.504677	47.8233	.	-1	-1
chr7	116522160	116522560	401	12	0.773835	0.297431	0.476404	47.7528	.	-1	-1
chr10	121503836	121504026	191	12	0.507914	0.0473418	0.460572	47.6132	chr10	121503644	121503893
chr9	41216695	41216907	213	14	0.848247	0.363805	0.484442	47.4258	.	-1	-1
chr19	6556405	6556770	366	13	0.857992	0.411338	0.446655	46.903	.	-1	-1
chr10	88118793	88119010	218	8	0.873864	0.254782	0.619082	46.6925	.	-1	-1
chr12	113280113	113280459	347	12	0.84095	0.345185	0.495764	46.6774	.	-1	-1
chr12	27866779	27866951	173	10	0.708812	0.164148	0.544664	46.4029	.	-1	-1
chr4	110183731	110183937	207	10	0.617628	0.0794163	0.538212	46.3668	.	-1	-1
chr2	231877786	231878066	281	12	0.824124	0.381186	0.442938	46.2743	.	-1	-1
chr10	102627878	102628119	242	12	0.789445	0.31646	0.472986	46.252	chr10	102627750	102628120
chr2	222448954	222449181	228	14	0.651674	0.204076	0.447598	46.2251	chr2	222448928	222449131
chr8	47993801	47994093	293	12	0.686273	0.226384	0.459889	46.1952	.	-1	-1
chr17	48407500	48407723	224	12	0.742829	0.215076	0.527752	45.9966	chr17	48407252	48407558
chr8	122835680	122836129	450	12	0.850355	0.378788	0.471566	45.8824	chr8	122835940	122836107
chr7	46206443	46206899	457	12	0.798473	0.34344	0.455033	45.8484	chr7	46206493	46206984
chr10	59859757	59859975	219	14	0.860911	0.430175	0.430736	45.748	.	-1	-1
chr18	16551024	16551275	252	13	0.814761	0.311925	0.502837	45.6169	.	-1	-1
chr15	85164905	85165237	333	12	0.645608	0.188241	0.457367	45.4909	chr15	85164877	85165079
chr10	68284158	68284581	424	11	0.80352	0.274886	0.528634	45.2881	.	-1	-1
chr3	194338373	194338523	151	12	0.87906	0.376124	0.502936	45.2079	.	-1	-1
chr9	61837614	61837781	168	13	0.821774	0.291586	0.530188	45.185	.	-1	-1
chr2	85318514	85318786	273	12	0.800705	0.319243	0.481462	45.1286	.	-1	-1
chr9	79362450	79362706	257	12	0.218451	0.69991	-0.481459	-44.8341	.	-1	-1
chr17	1511366	1511477	112	13	0.826408	0.405685	0.420724	44.7998	.	-1	-1
chr7	111113915	111114590	676	8	0.867179	0.227474	0.639705	44.6701	.	-1	-1
chr20	4982151	4982293	143	12	0.888657	0.293857	0.5948	44.537	.	-1	-1
chr9	43893316	43893547	232	11	0.923589	0.346719	0.57687	44.4216	.	-1	-1
chr14	55366339	55366583	245	6	0.918128	0.190638	0.72749	44.3594	.	-1	-1
chrX	155000268	155000859	592	12	0.837268	0.377152	0.460116	44.2152	.	-1	-1
chr17	8059197	8059357	161	14	0.625205	0.173637	0.451568	44.1354	chr17	8059331	8059534
chr3	55801236	55801312	77	6	0.899588	0.116971	0.782617	43.9996	.	-1	-1
chr12	12887758	12888006	249	10	0.86352	0.342211	0.521309	43.7161	.	-1	-1
chr6	157461259	157461492	234	12	0.796793	0.325721	0.471071	43.671	chr6	157461030	157461272
chr5	88334320	88334605	286	10	0.921959	0.408293	0.513666	43.4523	.	-1	-1
chr5	151083399	151083690	292	10	0.896481	0.389384	0.507097	43.3346	.	-1	-1
chr8	54328187	54328657	471	10	0.724486	0.188455	0.536031	43.2009	chr8	54328270	54328529
chr5	143142547	143143246	700	12	0.830292	0.381386	0.448905	43.1412	chr5	143142566	143142915
chr4	131496113	131496395	283	12	0.642635	0.196663	0.445971	43.0563	chr4	131496232	131496497
chr1	14733096	14733243	148	12	0.810425	0.366813	0.443612	43.0473	.	-1	-1
chr22	21095503	21095709	207	6	0.928291	0.188766	0.739524	42.932	chr22	21095607	21095767
chr1	247893276	247893633	358	13	0.245037	0.725974	-0.480937	-42.8408	.	-1	-1
chr1	214044496	214044995	500	8	0.923217	0.303687	0.61953	42.7708	chr1	214044579	214044899
chr2	160939041	160939264	224	12	0.388567	0.892349	-0.503782	-42.7514	.	-1	-1
chr20	14411918	14412366	449	10	0.699616	0.165227	0.534389	42.6917	.	-1	-1
chr1	120448308	120448484	177	10	0.910786	0.264761	0.646024	42.6836	.	-1	-1
chr16	22535477	22535645	169	11	0.84797	0.267112	0.580858	42.5883	.	-1	-1
chr2	86238531	86238751	221	10	0.91085	0.402961	0.507889	42.4326	.	-1	-1
chr12	105095436	105095612	177	10	0.625848	0.0801124	0.545736	42.3608	chr12	105095364	105095591
chr2	28681326	28681590	265	10	0.831624	0.262871	0.568753	42.2815	.	-1	-1
chr13	112344435	112344574	140	12	0.886263	0.492808	0.393455	42.2746	.	-1	-1
chr1	117897715	117897936	222	8	0.863165	0.237315	0.62585	42.2637	chr1	117897599	117897879
chr7	78851120	78851391	272	8	0.713717	0.104776	0.608941	42.2283	.	-1	-1
chr12	58335043	58335235	193	11	0.128251	0.686816	-0.558564	-42.0916	.	-1	-1
chr1	53308469	53308714	246	12	0.778892	0.354709	0.424184	42.0635	.	-1	-1
chr15	49778959	49779081	123	10	0.715152	0.130816	0.584336	41.9871	.	-1	-1
chr1	189737293	189737735	443	9	0.814483	0.249599	0.564884	41.6256	.	-1	-1
chr1	116573764	116574067	304	12	0.863147	0.45008	0.413067	41.5501	chr1	116573847	116574034
chr20	21384681	21384761	81	6	0.967896	0.235014	0.732882	41.422	.	-1	-1
chr9	21832138	21832373	236	10	0.731881	0.220551	0.511329	41.4206	.	-1	-1
chr9	94319182	94319280	99	12	0.901141	0.498101	0.403041	41.3221	.	-1	-1
chr1	116628641	116628728	88	8	0.859993	0.243999	0.615994	41.222	.	-1	-1
chr15	26384991	26385165	175	13	0.386711	0.795599	-0.408888	-41.163	.	-1	-1
chr12	95199024	95199494	471	10	0.814876	0.28909	0.525786	41.1617	.	-1	-1
chr18	79408095	79408228	134	12	0.790243	0.344236	0.446007	41.1287	.	-1	-1
chr15	22846095	22846178	84	12	0.854016	0.333976	0.520041	40.8461	.	-1	-1
chr2	286969	287094	126	12	0.775892	0.328199	0.447693	40.7453	.	-1	-1
chr17	58344564	58344888	325	11	0.872545	0.439095	0.43345	40.6735	.	-1	-1
chr12	12539523	12539677	155	8	0.752487	0.171456	0.581031	40.6691	.	-1	-1
chr3	194925746	194925890	145	12	0.729675	0.295881	0.433794	40.4613	.	-1	-1
chr4	99002800	99003026	227	12	0.823825	0.368258	0.455567	40.3767	.	-1	-1
chr15	26392606	26392700	95	12	0.423248	0.889672	-0.466424	-40.3538	.	-1	-1
chr1	59664324	59664507	184	11	0.840923	0.3678	0.473123	40.2729	.	-1	-1
chr2	96505481	96505713	233	12	0.654295	0.214219	0.440076	40.1515	chr2	96505364	96505539
chr12	62847878	62848748	871	10	0.77437	0.237104	0.537266	39.9058	chr12	62848559	62848778
chr17	61323875	61324048	174	12	0.618324	0.19968	0.418644	39.8626	.	-1	-1
chr4	27832508	27832585	78	8	0.202455	0.887487	-0.685031	-39.8425	.	-1	-1
chr22	42379144	42379462	319	10	0.745391	0.238259	0.507131	39.6584	.	-1	-1
chr8	11964005	11964202	198	10	0.79792	0.291501	0.506419	39.4526	.	-1	-1
chr5	10620529	10620802	274	8	0.908644	0.359662	0.548983	39.3665	.	-1	-1
chr15	43798616	43798980	365	10	0.614854	0.140658	0.474196	39.1149	.	-1	-1
chr13	91572122	91572356	235	10	0.849204	0.349266	0.499938	39.0946	.	-1	-1
chr2	1107076	1107271	196	12	0.230456	0.759836	-0.52938	-39.0704	.	-1	-1
chr12	76085665	76085772	108	10	0.542035	0.0597	0.482335	39.0437	.	-1	-1
chr15	91953481	91953810	330	12	0.8167	0.41434	0.402361	38.9475	chr15	91953526	91953806
chr16	34285100	34285172	73	12	0.843619	0.400777	0.442842	38.8675	.	-1	-1
chrX	13601538	13601645	108	8	0.730611	0.143118	0.587492	38.8432	.	-1	-1
chr12	62930510	62931201	692	11	0.629214	0.159105	0.470109	38.7854	.	-1	-1
chr5	87029959	87030067	109	12	0.676919	0.217967	0.458952	38.7503	chr5	87029875	87030168
chr2	140994016	140994087	72	11	0.899086	0.384567	0.514519	38.6952	.	-1	-1
chr11	65279906	65279963	58	10	0.631339	0.140913	0.490426	38.5409	.	-1	-1
chr15	92666870	92666959	90	12	0.539035	0.0942684	0.444767	38.4934	.	-1	-1
chr5	3638406	3638603	198	11	0.7479	0.192126	0.555774	38.1272	.	-1	-1
chr18	59847301	59847590	290	10	0.901836	0.437484	0.464352	38.1242	chr18	59847217	59847710
chrY	11204508	11204604	97	8	0.149545	0.858851	-0.709306	-37.8542	.	-1	-1
chr6	81749043	81749290	248	10	0.785036	0.277116	0.507921	37.7847	.	-1	-1
chr13	55957516	55957609	94	6	0.0568574	0.858851	-0.801994	-37.6127	.	-1	-1
chr21	8257188	8257252	65	10	0.157452	0.664798	-0.507346	-37.5371	.	-1	-1
chr1	122349304	122349390	87	10	0.798147	0.299441	0.498706	37.4185	.	-1	-1
chr12	75457950	75458187	238	11	0.664112	0.226928	0.437184	37.2696	chr12	75457931	75458234
chr5	99379267	99379547	281	8	0.843898	0.278366	0.565532	37.2695	.	-1	-1
chr16	37745725	37745797	73	10	0.876915	0.264761	0.612154	37.1392	.	-1	-1
chr7	58706625	58706901	277	11	0.656172	0.16909	0.487082	37.1182	.	-1	-1
chr3	141099726	141099787	62	4	0.855761	0.0459361	0.809825	36.9984	.	-1	-1
chr3	177145097	177145226	130	6	0.836949	0.133267	0.703681	36.9934	.	-1	-1
chr5	89283156	89283318	163	6	0.748713	0.0878282	0.660885	36.9655	.	-1	-1
chr4	139179949	139180155	207	8	0.835319	0.258211	0.577108	36.9361	.	-1	-1
chr3	92069995	92071988	1994	9	0.946811	0.404024	0.542787	36.6517	.	-1	-1
chrX	22730616	22730779	164	10	0.457449	0.883516	-0.426067	-36.5863	.	-1	-1
chr15	67174977	67175094	118	10	0.650367	0.187808	0.462559	36.3467	.	-1	-1
chr8	8390081	8390293	213	9	0.706972	0.211832	0.49514	36.2278	chr8	8390039	8390213
chr12	11846334	11846582	249	10	0.772069	0.306586	0.465483	36.1881	.	-1	-1
chr8	44732063	44732162	100	8	0.270967	0.900405	-0.629439	-36.1201	.	-1	-1
chr1	183181002	183181131	130	8	0.803492	0.191495	0.611997	36.0493	chr1	183180811	183181059
chr13	37116483	37116717	235	10	0.921737	0.484374	0.437363	35.9811	.	-1	-1
chr14	35287880	35287949	70	10	0.799185	0.313052	0.486134	35.7914	.	-1	-1
chr14	88630721	88630945	225	8	0.899335	0.361942	0.537393	35.6887	.	-1	-1
chr6	59618449	59618651	203	8	0.84242	0.204126	0.638294	35.631	.	-1	-1
chrX	42355737	42355943	207	10	0.791417	0.314546	0.476871	35.5189	.	-1	-1
chr9	39324081	39324221	141	7	0.192081	0.911455	-0.719374	-35.4313	.	-1	-1
chr4	145282516	145282687	172	8	0.95172	0.462819	0.488901	35.4215	.	-1	-1
chr1	19476939	19477109	171	8	0.861952	0.308561	0.553391	35.2324	.	-1	-1
chr4	175887	175943	57	8	0.273876	0.847474	-0.573599	-35.1173	.	-1	-1
chr22	30079103	30079280	178	6	0.83784	0.16105	0.676789	35.0271	.	-1	-1
chr8	127668049	127668526	478	8	0.672942	0.173825	0.499117	34.9826	chr8	127668185	127668539
chr4	120948792	120948976	185	8	0.735485	0.207215	0.52827	34.9738	.	-1	-1
chr4	49802681	49802927	247	8	0.879762	0.264461	0.615301	34.9639	.	-1	-1
chr10	95552889	95552943	55	8	0.766338	0.204989	0.561349	34.8354	chr10	95552706	95552921
chr1	219574685	219574916	232	7	0.733193	0.142223	0.59097	34.6839	chr1	219574564	219575000
chrX	69325038	69325307	270	7	0.852268	0.269191	0.583077	34.6615	chrX	69324920	69325160
chr13	97307845	97308139	295	10	0.661177	0.192394	0.468783	34.5965	.	-1	-1
chr4	11177345	11177568	224	10	0.142525	0.625163	-0.482639	-34.5761	.	-1	-1
chr2	93855373	93855610	238	8	0.810757	0.231796	0.578961	34.5166	.	-1	-1
chr1	205917928	205918003	76	8	0.91341	0.324944	0.588466	34.4343	.	-1	-1
chr6	31312078	31312350	273	8	0.898423	0.36821	0.530213	34.4177	.	-1	-1
chr3	72683204	72683534	331	9	0.822626	0.279746	0.54288	34.3652	.	-1	-1
chr14	47066884	47067047	164	10	0.306934	0.750904	-0.44397	-34.3612	.	-1	-1
chr8	174651	174873	223	7	0.930532	0.300607	0.629925	34.281	.	-1	-1
chr8	45860737	45860835	99	9	0.895686	0.284596	0.61109	34.2501	.	-1	-1
chr8	141406274	141406442	169	10	0.745297	0.333576	0.411721	34.1529	chr8	141406162	141406381
chr6	59066498	59066619	122	10	0.810397	0.295204	0.515193	34.0078	.	-1	-1
chr1	39187469	39187748	280	6	0.877568	0.248693	0.628875	33.89	.	-1	-1
chr7	92797871	92798054	184	8	0.825866	0.266288	0.559578	33.8452	.	-1	-1
chrX	131445671	131445957	287	9	0.140068	0.601566	-0.461499	-33.8261	.	-1	-1
chr2	72113955	72114187	233	10	0.86731	0.469111	0.398199	33.7832	.	-1	-1
chr14	24813652	24813730	79	4	0.922932	0.101119	0.821813	33.4658	.	-1	-1
chr16	18344401	18344499	99	10	0.917487	0.453342	0.464145	33.4365	.	-1	-1
chr13	110372180	110372348	169	9	0.916501	0.506538	0.409963	33.4322	.	-1	-1
chr12	94706305	94706632	328	8	0.553936	0.0733866	0.48055	33.3848	chr12	94706462	94706639
chr7	69682947	69683091	145	10	0.915303	0.540234	0.375069	33.3315	chr7	69682940	69683112
chrX	57607942	57608001	60	10	0.484871	0.872045	-0.387174	-33.3185	.	-1	-1
chr8	100459835	100459938	104	10	0.759769	0.317942	0.441827	33.3146	.	-1	-1
chr18	24740146	24740392	247	8	0.871568	0.340796	0.530772	33.2875	chr18	24739984	24740171
chr11	107365353	107365668	316	9	0.882817	0.40099	0.481827	33.2863	.	-1	-1
chr2	68427421	68427777	357	9	0.913494	0.483144	0.43035	33.2735	chr2	68427280	68427503
chr10	114026915	114027072	158	10	0.497169	0.0959195	0.401249	33.1874	.	-1	-1
chr4	131146858	131146949	92	8	0.687445	0.143079	0.544366	33.09	.	-1	-1
chr12	34938640	34938936	297	10	0.873678	0.407376	0.466302	33.0746	.	-1	-1
chr18	20526584	20526679	96	10	0.87433	0.400528	0.473802	33.0685	.	-1	-1
chrX	68325618	68325668	51	8	0.289401	0.905473	-0.616072	-33.0252	.	-1	-1
chr1	41100234	41100466	233	8	0.849994	0.370399	0.479596	32.8109	chr1	41100213	41100431
chrX	142377594	142377895	302	7	0.220751	0.81543	-0.594679	-32.7816	.	-1	-1
chr1	172476239	172476415	177	4	0.875591	0.0783896	0.797201	32.7682	chr1	172476190	172476422
chr19	21736067	21736179	113	10	0.140627	0.546117	-0.40549	-32.7606	.	-1	-1
chrX	63001304	63001359	56	8	0.0950506	0.653295	-0.558244	-32.6608	.	-1	-1
chr6	10355358	10355498	141	10	0.517053	0.0958662	0.421187	32.6524	chr6	10355397	10355681
chr3	37173889	37173963	75	6	0.897677	0.244703	0.652975	32.5793	.	-1	-1
chr16	31269352	31269583	232	8	0.729064	0.214469	0.514595	32.5457	.	-1	-1
chr12	62845081	62845207	127	4	0.830839	0.0602373	0.770602	32.5384	.	-1	-1
chr2	16400125	16400373	249	8	0.531825	0.062827	0.468998	32.5274	chr2	16400301	16400639
chr5	129078658	129078885	228	8	0.604534	0.110907	0.493627	32.4666	.	-1	-1
chr11	51476137	51476235	99	8	0.913885	0.264761	0.649123	32.4156	.	-1	-1
chr9	29253821	29253937	117	8	0.347486	0.860955	-0.51347	-32.3354	.	-1	-1
chr9	45120498	45120599	102	9	0.838496	0.248366	0.59013	32.3292	.	-1	-1
chr20	6256603	6256671	69	8	0.0453818	0.550142	-0.50476	-32.2164	.	-1	-1
chr2	230765892	230766211	320	8	0.866105	0.352826	0.513279	32.2026	.	-1	-1
chr17	60030888	60031118	231	9	0.814321	0.326514	0.487806	32.1943	chr17	60030848	60031084
chr12	52116685	52116761	77	10	0.857453	0.448263	0.409191	32.1753	.	-1	-1
chr21	43866828	43866907	80	10	0.731474	0.346201	0.385273	32.1657	.	-1	-1
chr18	40305785	40306021	237	8	0.220851	0.750401	-0.52955	-32.1281	.	-1	-1
chr18	69188712	69189001	290	10	0.769155	0.299252	0.469903	32.1063	.	-1	-1
chr13	30193961	30194068	108	8	0.963044	0.45613	0.506914	32.0832	.	-1	-1
chr20	6618845	6618923	79	8	0.194614	0.788631	-0.594017	-31.9867	.	-1	-1
chr1	15084258	15084486	229	10	0.87862	0.457247	0.421374	31.9002	.	-1	-1
chr8	70361775	70361969	195	8	0.868782	0.393966	0.474816	31.8658	.	-1	-1
chr13	61852126	61852327	202	8	0.859277	0.343767	0.51551	31.8613	.	-1	-1
chr5	107153066	107153225	160	10	0.618415	0.142318	0.476096	31.8583	.	-1	-1
chr19	47940911	47941110	200	8	0.673361	0.133526	0.539836	31.8119	.	-1	-1
chr20	28258791	28258876	86	8	0.904302	0.297905	0.606397	31.8048	.	-1	-1
chr9	86151178	86151348	171	8	0.868972	0.337232	0.531741	31.7658	.	-1	-1
chr2	92406159	92406396	238	8	0.857408	0.332855	0.524553	31.7055	.	-1	-1
chrX	127841912	127842187	276	9	0.441709	0.873535	-0.431826	-31.6883	.	-1	-1
chr17	42329078	42329213	136	4	0.887896	0.1461	0.741796	31.6285	chr17	42329058	42329332
chrX	52691445	52691540	96	9	0.885001	0.283473	0.601527	31.5546	.	-1	-1
chrUn_KI270750v1	123880	123970	91	7	0.0838952	0.735961	-0.652066	-31.5458	.	-1	-1
chr4	184317589	184317761	173	8	0.909631	0.451125	0.458506	31.538	.	-1	-1
chr16	37534117	37534652	536	10	0.888748	0.299829	0.588919	31.4705	.	-1	-1
chr18	28743339	28743522	184	10	0.692216	0.241788	0.450427	31.3949	.	-1	-1
chr17	7132777	7133002	226	8	0.849092	0.360549	0.488544	31.3074	.	-1	-1
chr2	161940294	161940559	266	8	0.819852	0.318811	0.501041	31.2508	.	-1	-1
chrX	141179258	141179452	195	8	0.347022	0.80424	-0.457218	-31.2451	.	-1	-1
chr15	92665648	92665774	127	8	0.611077	0.156253	0.454824	31.2086	chr15	92665337	92665676
chr7	150386004	150386141	138	10	0.762471	0.310028	0.452443	31.1521	.	-1	-1
chr9	67156092	67156173	82	10	0.941752	0.453603	0.488149	31.1245	.	-1	-1
chrX	101839858	101840043	186	9	0.071255	0.575359	-0.504104	-31.106	.	-1	-1
chr8	72972421	72972617	197	9	0.737599	0.293857	0.443742	31.0702	.	-1	-1
chr17	72126821	72127108	288	8	0.687382	0.162624	0.524758	30.9533	chr17	72127007	72127233
chr6	143696081	143696271	191	7	0.72742	0.185067	0.542353	30.9515	.	-1	-1
chr2	93477184	93477421	238	8	0.766015	0.18684	0.579176	30.9278	.	-1	-1
chrX	60359966	60360047	82	8	0.185486	0.834231	-0.648744	-30.9211	.	-1	-1
chr13	18044750	18044918	169	10	0.650029	0.180141	0.469889	30.8878	.	-1	-1
chr10	126134339	126134550	212	8	0.815714	0.342119	0.473595	30.8842	.	-1	-1
chr9	11702230	11702301	72	8	0.0548125	0.591268	-0.536455	-30.7678	.	-1	-1
chr4	81574042	81574229	188	8	0.757438	0.235662	0.521776	30.7287	chr4	81573991	81574196
chr9	44942286	44942342	57	8	0.940312	0.310943	0.629368	30.6074	.	-1	-1
chr18	19797587	19797855	269	8	0.338097	0.804298	-0.466201	-30.5565	.	-1	-1
chr12	31205083	31205299	217	6	0.8896	0.304183	0.585418	30.5045	.	-1	-1
chr7	134351457	134351652	196	9	0.907418	0.439026	0.468392	30.4395	.	-1	-1
chr4	184319423	184319501	79	6	0.747538	0.109338	0.638201	30.392	.	-1	-1
chr18	18790217	18790307	91	8	0.883302	0.264761	0.618541	30.3813	.	-1	-1
chr16	37286781	37286867	87	8	0.876915	0.261969	0.614947	30.3418	.	-1	-1
chr12	9791103	9791315	213	6	0.813462	0.208275	0.605187	30.3184	.	-1	-1
chr3	57046498	57046773	276	8	0.850716	0.382904	0.467812	30.1294	.	-1	-1
chr16	38104668	38105838	1171	9	0.842111	0.23187	0.610241	30.1108	.	-1	-1
chr20	28271035	28271300	266	9	0.840382	0.279964	0.560418	30.096	.	-1	-1
chr9	44117724	44117825	102	8	0.934312	0.310943	0.623369	30.0729	.	-1	-1
chr16	37826906	37826972	67	9	0.850361	0.293857	0.556503	29.9513	.	-1	-1
chr5	115767609	115767730	122	6	0.871075	0.240347	0.630728	29.9344	.	-1	-1
chr3	75993610	75993661	52	4	0.110385	0.924229	-0.813844	-29.9302	.	-1	-1
chr9	44679037	44679112	76	8	0.459106	0.918098	-0.458992	-29.8513	.	-1	-1
chr7	30638240	30638417	178	8	0.849539	0.299542	0.549997	29.8095	.	-1	-1
chr13	91623260	91623456	197	6	0.732979	0.126975	0.606004	29.7106	chr13	91623299	91623467
chr4	118910278	118910412	135	7	0.713473	0.164317	0.549156	29.7023	.	-1	-1
chrUn_GL000220v1	94420	94493	74	8	0.80317	0.188739	0.614431	29.6306	.	-1	-1
chr7	87097224	87097461	238	8	0.882951	0.360394	0.522557	29.6165	.	-1	-1
chr6	165358042	165358252	211	8	0.751711	0.309415	0.442296	29.6124	.	-1	-1
chr12	58329143	58329214	72	10	0.0779798	0.57014	-0.49216	-29.6038	.	-1	-1
chrX	65148135	65148304	170	8	0.704798	0.198022	0.506776	29.603	.	-1	-1
chr2	106132381	106132853	473	9	0.333526	0.892841	-0.559315	-29.5873	.	-1	-1
chr1	172025227	172025444	218	8	0.831479	0.35673	0.474749	29.5828	.	-1	-1
chr5	151085620	151085709	90	8	0.839762	0.386867	0.452895	29.5607	.	-1	-1
chr14	26678295	26678392	98	9	0.803906	0.364596	0.43931	29.5079	.	-1	-1
chr2	37390423	37390478	56	7	0.74446	0.197095	0.547365	29.3127	.	-1	-1
chr11	126592006	126592201	196	9	0.78098	0.358443	0.422537	29.2789	.	-1	-1
chr1	118034001	118034311	311	7	0.676305	0.14512	0.531186	29.2541	.	-1	-1
chr19	1183941	1184018	78	9	0.781476	0.368836	0.412639	29.1587	.	-1	-1
chr2	161397857	161398004	148	8	0.554322	0.103199	0.451123	28.9641	.	-1	-1
chr21	34845675	34845958	284	8	0.565753	0.101237	0.464516	28.9398	.	-1	-1
chr1	215261396	215261525	130	9	0.44938	0.900899	-0.451519	-28.8711	.	-1	-1
chr1	210122169	210122258	90	9	0.232022	0.690649	-0.458627	-28.8482	.	-1	-1
chr3	22795003	22795063	61	4	0.079115	0.883819	-0.804704	-28.7608	.	-1	-1
chr4	51024917	51024995	79	9	0.677788	0.173424	0.504364	28.7546	.	-1	-1
chr13	56830563	56830645	83	6	0.171578	0.858851	-0.687273	-28.5576	.	-1	-1
chr1	14617821	14618006	186	8	0.815094	0.378934	0.436159	28.5383	chr1	14617756	14618091
chr6	75268234	75268613	380	6	0.825564	0.285878	0.539686	28.502	.	-1	-1
chr15	85354624	85354803	180	8	0.798339	0.329078	0.469261	28.4522	.	-1	-1
chr6	58942793	58942889	97	8	0.876915	0.264761	0.612154	28.3057	.	-1	-1
chr4	76850003	76850116	114	8	0.640727	0.15722	0.483507	28.2704	chr4	76850108	76850343
chr16	35964342	35964694	353	8	0.604654	0.101003	0.503651	28.2251	.	-1	-1
chr18	17690245	17691202	958	5	0.900581	0.132313	0.768267	28.1819	.	-1	-1
chr5	126226205	126226290	86	6	0.858423	0.25461	0.603813	28.1776	.	-1	-1
chr9	62596391	62596595	205	8	0.856072	0.294692	0.561379	28.1616	.	-1	-1
chr12	28332693	28332865	173	6	0.795359	0.204247	0.591112	28.135	.	-1	-1
chr18	16309917	16310000	84	8	0.912982	0.44454	0.468441	28.1319	.	-1	-1
chr20	27248309	27248456	148	8	0.876915	0.264761	0.612154	28.1255	.	-1	-1
chr3	36364548	36364693	146	8	0.719646	0.241573	0.478073	28.1224	.	-1	-1
chrX	59488234	59488563	330	8	0.790255	0.257954	0.532301	28.0965	.	-1	-1
chr18	44886888	44887212	325	6	0.767755	0.200037	0.567717	28.088	chr18	44887207	44887612
chr5	159900367	159900614	248	6	0.796481	0.248757	0.547724	28.0565	.	-1	-1
chr6	59757355	59757451	97	6	0.967658	0.264761	0.702897	28.0135	.	-1	-1
chr4	170765177	170765275	99	8	0.0652746	0.450095	-0.384821	-27.9227	.	-1	-1
chr22	11720433	11720544	112	8	0.131299	0.710329	-0.57903	-27.8701	.	-1	-1
chr8	60254927	60255076	150	8	0.839556	0.368622	0.470934	27.8306	.	-1	-1
chrX	61010696	61010882	187	8	0.185486	0.776668	-0.591182	-27.8232	.	-1	-1
chr3	22678127	22678306	180	8	0.259389	0.725528	-0.466138	-27.7992	.	-1	-1
chr5	177301796	177302012	217	8	0.790524	0.331983	0.458541	27.795	.	-1	-1
chr5	138839246	138839357	112	9	0.854242	0.424707	0.429535	27.7532	.	-1	-1
chr4	37674378	37674583	206	8	0.743928	0.262564	0.481364	27.7476	.	-1	-1
chr2	133422773	133422990	218	8	0.760091	0.29173	0.468361	27.7211	.	-1	-1
chr9	65241842	65241951	110	9	0.649974	0.176619	0.473355	27.7162	.	-1	-1
chrX	54788947	54789008	62	9	0.314406	0.735908	-0.421502	-27.6683	.	-1	-1
chr17	34252499	34252639	141	8	0.470294	0.0871801	0.383114	27.6596	chr17	34252500	34252846
chr20	7350290	7350384	95	8	0.312427	0.82816	-0.515733	-27.6024	.	-1	-1
chr11	53154982	53155121	140	6	0.875244	0.194961	0.680282	27.5947	.	-1	-1
chr6	125946551	125946759	209	8	0.452845	0.0796617	0.373183	27.54	.	-1	-1
chr15	63880914	63881026	113	8	0.857766	0.43149	0.426276	27.5374	.	-1	-1
chr18	15791933	15791991	59	8	0.831436	0.264761	0.566675	27.5264	.	-1	-1
chr21	29314900	29315589	690	8	0.748279	0.267616	0.480663	27.5155	.	-1	-1
chr17	58528629	58528736	108	7	0.80867	0.296794	0.511876	27.4394	.	-1	-1
chr3	36168585	36168707	123	8	0.872461	0.366759	0.505702	27.4243	.	-1	-1
chr9	28233156	28234307	1152	6	0.314467	0.925098	-0.610632	-27.3931	.	-1	-1
chr10	39880501	39880682	182	8	0.769423	0.332371	0.437051	27.3744	.	-1	-1
chr2	136855660	136855752	93	8	0.141122	0.587379	-0.446258	-27.3375	.	-1	-1
chr3	141262519	141262702	184	8	0.818098	0.380363	0.437735	27.3346	.	-1	-1
chr2	186907543	186907811	269	8	0.832274	0.392769	0.439505	27.2893	.	-1	-1
chr8	105367157	105367333	177	8	0.814577	0.342008	0.472568	27.2849	.	-1	-1
chr11	51347779	51347877	99	8	0.822332	0.264761	0.557571	27.22	.	-1	-1
chr19	3974154	3974229	76	8	0.730848	0.166089	0.564758	27.2019	.	-1	-1
chr17	60027988	60028112	125	8	0.814795	0.264761	0.550034	27.171	.	-1	-1
chr3	173584395	173584583	189	8	0.146941	0.558201	-0.411261	-27.1579	.	-1	-1
chr16	37055149	37055220	72	6	0.858415	0.189649	0.668766	27.1321	.	-1	-1
chr9	10311823	10311877	55	6	0.0554769	0.656516	-0.601039	-27.0785	.	-1	-1
chr9	41861328	41861408	81	7	0.268434	0.911455	-0.643021	-27.0743	.	-1	-1
chr19	43944850	43945179	330	8	0.338457	0.785233	-0.446776	-27.0735	.	-1	-1
chr1	200153419	200153594	176	6	0.906403	0.311035	0.595368	27.066	.	-1	-1
chr6	93324425	93324730	306	6	0.906795	0.349484	0.557311	26.884	.	-1	-1
chr11	65783048	65783256	209	8	0.839972	0.409809	0.430163	26.8688	.	-1	-1
chr1	187451296	187451522	227	8	0.315379	0.77803	-0.462651	-26.8346	.	-1	-1
chrX	84878604	84878861	258	8	0.400191	0.804531	-0.40434	-26.7895	.	-1	-1
chr18	19173326	19173416	91	5	0.946941	0.195186	0.751755	26.7668	.	-1	-1
chr6	158300485	158300670	186	6	0.644357	0.0762376	0.568119	26.7491	chr6	158300416	158300616
chr7	61461779	61461832	54	6	0.876915	0.201064	0.675851	26.7407	.	-1	-1
chr11	27192196	27192420	225	8	0.898263	0.460749	0.437515	26.7378	.	-1	-1
chr7	116626552	116626811	260	8	0.878655	0.452523	0.426132	26.7204	.	-1	-1
chr15	56024811	56024910	100	8	0.787542	0.364635	0.422906	26.7179	.	-1	-1
chr18	17164740	17164829	90	7	0.903526	0.316136	0.587391	26.6949	.	-1	-1
chr8	88350719	88350778	60	8	0.553525	0.139927	0.413599	26.6185	.	-1	-1
chr18	60947768	60947896	129	8	0.382379	0.834031	-0.451652	-26.6064	.	-1	-1
chr3	120323790	120324031	242	8	0.73779	0.275147	0.462643	26.5959	.	-1	-1
chr17	9389420	9389567	148	8	0.680987	0.233907	0.447081	26.5873	.	-1	-1
chr13	16735974	16736073	100	7	0.859478	0.240756	0.618722	26.5651	.	-1	-1
chr9	43586940	43587041	102	5	0.924615	0.166089	0.758526	26.516	.	-1	-1
chr7	59689244	59689485	242	8	0.722588	0.160539	0.562049	26.4888	.	-1	-1
chr12	37109782	37109868	87	8	0.841607	0.285897	0.55571	26.48	.	-1	-1
chr1	1215383	1215557	175	8	0.775098	0.276289	0.498809	26.4658	chr1	1215141	1215406
chr2	196088440	196088680	241	8	0.422901	0.865094	-0.442193	-26.4333	.	-1	-1
chrX	149575765	149575859	95	6	0.928066	0.264761	0.663305	26.4144	.	-1	-1
chr13	59010733	59010828	96	8	0.920963	0.515458	0.405504	26.3698	.	-1	-1
chr2	185254821	185254938	118	7	0.413765	0.895226	-0.481461	-26.3482	.	-1	-1
chr7	30640906	30640973	68	8	0.805353	0.391662	0.413691	26.2849	.	-1	-1
chr9	44695878	44695979	102	9	0.477157	0.880783	-0.403627	-26.2513	.	-1	-1
chr18	16542340	16542430	91	8	0.893727	0.310943	0.582783	26.2481	.	-1	-1
chr14	68784532	68784730	199	6	0.761477	0.234781	0.526696	26.2183	.	-1	-1
chr9	28224689	28224871	183	8	0.794052	0.347345	0.446707	26.1555	.	-1	-1
chr18	15780238	15780325	88	8	0.876915	0.327822	0.549094	26.1436	.	-1	-1
chr1	22176402	22176483	82	8	0.757211	0.269976	0.487235	26.0765	.	-1	-1
chr9	111064160	111064318	159	6	0.781806	0.212979	0.568827	26.0533	.	-1	-1
chr12	75457783	75457874	92	6	0.842623	0.312312	0.53031	26.0338	.	-1	-1
chr15	20024302	20024486	185	7	0.260269	0.869893	-0.609624	-26.0264	.	-1	-1
chr8	49117901	49118066	166	7	0.431676	0.871559	-0.439883	-25.9075	.	-1	-1
chr16	61915527	61915704	178	8	0.370908	0.83123	-0.460321	-25.899	.	-1	-1
chr9	29784570	29784705	136	8	0.294362	0.799614	-0.505252	-25.8692	.	-1	-1
chr9	62009705	62009846	142	8	0.380142	0.911455	-0.531313	-25.8687	.	-1	-1
chr9	74023684	74023778	95	7	0.355062	0.900903	-0.545841	-25.8092	.	-1	-1
chr10	29955316	29955534	219	8	0.822891	0.375654	0.447237	25.7826	.	-1	-1
chr4	94457481	94457674	194	6	0.248075	0.814402	-0.566327	-25.7771	.	-1	-1
chr19	41183417	41183557	141	8	0.822469	0.395083	0.427386	25.7489	.	-1	-1
chr16	50114877	50115074	198	6	0.865184	0.340222	0.524961	25.7305	.	-1	-1
chr8	85759217	85759348	132	7	0.879251	0.30651	0.572741	25.6679	.	-1	-1
chr8	3132076	3132349	274	7	0.412163	0.877727	-0.465565	-25.5963	.	-1	-1
chr18	44853235	44853475	241	6	0.860415	0.301041	0.559374	25.5912	chr18	44852969	44853237
chr18	15578977	15579047	71	8	0.249648	0.776668	-0.52702	-25.5765	.	-1	-1
chr5	174832154	174832240	87	6	0.594607	0.0909186	0.503689	25.5329	chr5	174832115	174832427
chr2	126447005	126447100	96	8	0.178724	0.645575	-0.466851	-25.5008	.	-1	-1
chrX	83543341	83543467	127	8	0.292184	0.834231	-0.542046	-25.471	.	-1	-1
chrX	149810701	149810760	60	8	0.891577	0.51218	0.379398	25.3598	.	-1	-1
chr11	54244922	54245097	176	7	0.970725	0.529878	0.440848	25.356	.	-1	-1
chrX	40871574	40872093	520	7	0.774475	0.276896	0.497579	25.3384	chrX	40871377	40871612
chr5	68141586	68141740	155	6	0.936971	0.425438	0.511533	25.2546	.	-1	-1
chr8	44577261	44577359	99	7	0.913166	0.289315	0.623851	25.2307	.	-1	-1
chr12	29682297	29682461	165	6	0.837704	0.281069	0.556635	25.2247	.	-1	-1
chr3	23354929	23354994	66	6	0.901875	0.304124	0.597751	25.2007	.	-1	-1
chr3	69288968	69289214	247	6	0.768893	0.220836	0.548057	25.0129	.	-1	-1
chr2	113391748	113391964	217	7	0.874894	0.435798	0.439096	24.9031	.	-1	-1
chr20	27595932	27596024	93	7	0.769383	0.262483	0.5069	24.8704	.	-1	-1
chr13	48291815	48292109	295	4	0.78846	0.0942843	0.694176	24.8635	.	-1	-1
chrX	50114781	50114845	65	8	0.482518	0.900507	-0.417989	-24.8488	.	-1	-1
chr17	79021189	79021243	55	4	0.757107	0.0839656	0.673142	24.8409	.	-1	-1
chrX	59805568	59805700	133	7	0.149545	0.752203	-0.602658	-24.8316	.	-1	-1
chr4	152045934	152045990	57	7	0.0624188	0.434549	-0.372131	-24.8213	.	-1	-1
chr7	33736214	33736299	86	8	0.854836	0.391259	0.463577	24.8191	.	-1	-1
chr5	159178906	159179242	337	6	0.688997	0.178599	0.510398	24.8115	.	-1	-1
chrX	23146214	23146289	76	6	0.867595	0.321631	0.545964	24.7852	.	-1	-1
chr6	94347023	94347265	243	6	0.77415	0.234785	0.539365	24.769	.	-1	-1
chr8	45603091	45603189	99	5	0.13116	0.873841	-0.742681	-24.7558	.	-1	-1
chr10	85358228	85358360	133	7	0.080065	0.578216	-0.498151	-24.7001	.	-1	-1
chr13	112659020	112659266	247	6	0.744216	0.244322	0.499894	24.6706	chr13	112659122	112659392
chr8	76125690	76125777	88	6	0.309931	0.868908	-0.558977	-24.6529	.	-1	-1
chrX	111732291	111732770	480	6	0.482295	0.946722	-0.464427	-24.6526	.	-1	-1
chr12	34106706	34106881	176	7	0.0905677	0.590052	-0.499484	-24.645	.	-1	-1
chr15	82358968	82359042	75	7	0.876866	0.289315	0.587551	24.6385	.	-1	-1
chrX	24486215	24486270	56	6	0.855217	0.428954	0.426263	24.6096	.	-1	-1
chr1	213806680	213806919	240	6	0.736581	0.204377	0.532204	24.608	.	-1	-1
chr13	46165643	46165819	177	6	0.595587	0.119071	0.476516	24.5759	.	-1	-1
chr13	37492846	37493381	536	6	0.779327	0.234634	0.544694	24.5707	.	-1	-1
chr4	50454511	50454740	230	7	0.815224	0.275916	0.539309	24.5432	.	-1	-1
chr9	28579832	28580006	175	6	0.297857	0.875519	-0.577662	-24.5339	.	-1	-1
chr1	124004562	124004648	87	7	0.710014	0.24101	0.469003	24.515	.	-1	-1
chr5	49735901	49736046	146	8	0.710507	0.225791	0.484716	24.496	.	-1	-1
chr10	62055949	62056119	171	7	0.623098	0.179375	0.443723	24.4465	.	-1	-1
chr5	76831222	76831310	89	4	0.811393	0.171379	0.640014	24.4404	chr5	76831203	76831393
chr9	33426453	33426637	185	6	0.968591	0.471231	0.497361	24.4372	.	-1	-1
chr8	9045359	9045415	57	6	0.876652	0.35704	0.519611	24.436	.	-1	-1
chr5	138461350	138461442	93	6	0.839962	0.32831	0.511652	24.4097	.	-1	-1
chr5	78076428	78076665	238	5	0.6853	0.112701	0.5726	24.408	chr5	78076269	78076635
chr18	17759451	17759540	90	4	0.965406	0.166089	0.799317	24.4071	.	-1	-1
chr11	52147829	52147926	98	7	0.223928	0.845761	-0.621833	-24.4042	.	-1	-1
chr18	17868895	17868984	90	7	0.903173	0.289315	0.613857	24.3983	.	-1	-1
chrX	21572571	21572638	68	8	0.479357	0.860957	-0.381601	-24.3557	.	-1	-1
chr20	26797462	26797533	72	7	0.864684	0.244049	0.620635	24.3457	.	-1	-1
chr3	186605490	186605693	204	6	0.948136	0.387573	0.560563	24.3284	.	-1	-1
chr20	27393278	27393362	85	7	0.864684	0.244049	0.620635	24.2949	.	-1	-1
chrX	49868601	49868930	330	6	0.809225	0.287923	0.521302	24.2901	.	-1	-1
chr22	40746443	40746544	102	6	0.898354	0.220997	0.677357	24.2791	.	-1	-1
chr9	29647271	29647361	91	6	0.817103	0.228179	0.588924	24.2738	.	-1	-1
chr22	17781769	17781995	227	7	0.838292	0.403997	0.434295	24.2584	chr22	17781753	17781923
chr17	25728274	25728332	59	8	0.796575	0.264761	0.531814	24.2445	.	-1	-1
chr10	102772465	102772608	144	7	0.68014	0.225695	0.454445	24.1911	.	-1	-1
chr4	180237979	180238304	326	7	0.868416	0.377907	0.490509	24.186	.	-1	-1
chr4	51524708	51524818	111	5	0.940442	0.250965	0.689477	24.1162	.	-1	-1
chr17	49110228	49110597	370	6	0.869017	0.369979	0.499037	24.0948	.	-1	-1
chr15	71709957	71710053	97	6	0.904461	0.358495	0.545966	24.0581	.	-1	-1
chr9	42001247	42001338	92	7	0.94346	0.431729	0.511731	23.9795	.	-1	-1
chr16_KI270728v1_random	1477173	1477274	102	7	0.864684	0.298334	0.56635	23.9178	.	-1	-1
chr3	63849245	63849345	101	7	0.930601	0.516057	0.414544	23.9077	.	-1	-1
chr10	32418773	32418867	95	6	0.75525	0.218634	0.536615	23.8942	.	-1	-1
chr3	174987548	174987688	141	7	0.914358	0.483619	0.430739	23.8792	.	-1	-1
chr18	62910375	62910573	199	5	0.689315	0.147182	0.542134	23.869	.	-1	-1
chr3	91920331	91920403	73	5	0.922319	0.201987	0.720332	23.8514	.	-1	-1
chr4	19639058	19639142	85	4	0.841045	0.163079	0.677966	23.7306	.	-1	-1
chr18	15536452	15536521	70	7	0.337227	0.884512	-0.547285	-23.7228	.	-1	-1
chr9	32743389	32743601	213	7	0.705449	0.258302	0.447147	23.684	.	-1	-1
chrX	71989868	71989946	79	7	0.70215	0.232477	0.469673	23.6816	chrX	71989931	71990146
chr17	26255971	26256088	118	7	0.3343	0.900903	-0.566603	-23.6328	.	-1	-1
chr21	44159628	44159784	157	7	0.856233	0.382868	0.473365	23.6285	.	-1	-1
chr6	59709656	59709754	99	6	0.863919	0.220997	0.642922	23.5704	.	-1	-1
chr16	36946117	36946203	87	8	0.853786	0.318635	0.535152	23.5588	.	-1	-1
chr21	6832011	6832101	91	7	0.194649	0.648505	-0.453856	-23.5522	.	-1	-1
chr7	60779374	60779484	111	7	0.292676	0.869893	-0.577218	-23.5272	.	-1	-1
chr5	124936016	124936173	158	4	0.822455	0.222873	0.599582	23.4897	chr5	124935957	124936288
chr7	3862212	3862399	188	7	0.882395	0.438754	0.44364	23.4846	chr7	3862133	3862293
chr9	13993914	13994134	221	6	0.784337	0.277271	0.507065	23.4651	.	-1	-1
chr17	19107303	19107363	61	6	0.741621	0.18603	0.555591	23.4239	.	-1	-1
chr20	28515840	28515931	92	6	0.290926	0.874716	-0.583791	-23.406	.	-1	-1
chr1	17030370	17030509	140	6	0.882274	0.448127	0.434148	23.4016	.	-1	-1
chr7	150321006	150321122	117	4	0.891783	0.229706	0.662077	23.3738	.	-1	-1
chr3	36246356	36246598	243	6	0.795605	0.290644	0.504962	23.3626	.	-1	-1
chr16	38108471	38108542	72	7	0.260269	0.845761	-0.585491	-23.334	.	-1	-1
chr6	36627864	36627962	99	5	0.842974	0.297956	0.545018	23.3117	.	-1	-1
chr2	17937106	17937283	178	6	0.445577	0.925634	-0.480057	-23.3041	.	-1	-1
chr1	199226367	199226488	122	5	0.618039	0.0712214	0.546818	23.2472	chr1	199226210	199226494
chr3	23329619	23329764	146	7	0.827765	0.348481	0.479284	23.246	.	-1	-1
chr4	153795474	153795643	170	6	0.901553	0.357761	0.543792	23.2413	.	-1	-1
chr8	120648233	120648305	73	7	0.496086	0.915492	-0.419406	-23.2195	.	-1	-1
chr18	16289336	16289426	91	7	0.941562	0.40051	0.541052	23.1971	.	-1	-1
chr4	158378373	158378425	53	7	0.902601	0.482816	0.419785	23.1748	.	-1	-1
chr5	64374904	64375073	170	6	0.496002	0.945812	-0.44981	-23.1138	.	-1	-1
chr8	64674810	64675055	246	6	0.832527	0.325535	0.506992	23.1072	.	-1	-1
chr6	158476096	158476216	121	6	0.690875	0.212039	0.478837	23.1019	.	-1	-1
chrX	68901692	68901771	80	6	0.684419	0.163101	0.521319	23.0989	chrX	68901529	68901805
chr4	76828480	76828696	217	7	0.964055	0.537399	0.426656	23.0582	.	-1	-1
chr17	27856907	27857106	200	6	0.817488	0.329262	0.488226	23.0104	chr17	27856840	27857015
chr18	17498645	17498803	159	6	0.324757	0.926282	-0.601524	-22.9961	.	-1	-1
chr2	30155341	30155539	199	4	0.721786	0.0916514	0.630135	22.9866	chr2	30155311	30155478
chr2	143940822	143941000	179	6	0.970115	0.461454	0.508661	22.9859	.	-1	-1
chr8	81911520	81911910	391	6	0.166123	0.670139	-0.504016	-22.9843	.	-1	-1
chr5	36835253	36835344	92	7	0.879752	0.438857	0.440895	22.9598	.	-1	-1
chr10	106478265	106478346	82	7	0.914905	0.55241	0.362495	22.8395	.	-1	-1
chr1	19550268	19550497	230	6	0.648504	0.174606	0.473898	22.8288	chr1	19550292	19550596
chr11	118268207	118268283	77	4	0.219137	0.908193	-0.689055	-22.791	.	-1	-1
chr9	120169295	120169417	123	6	0.153114	0.708321	-0.555207	-22.7848	.	-1	-1
chrX	8041258	8041367	110	6	0.694382	0.169327	0.525054	22.7728	.	-1	-1
chr18	15726362	15726427	66	6	0.20164	0.858851	-0.657211	-22.7607	.	-1	-1
chr5	1459299	1459392	94	6	0.85867	0.3058	0.552871	22.715	.	-1	-1
chr18	18711828	18711894	67	4	0.944183	0.204078	0.740105	22.7041	.	-1	-1
chr3	69297624	69297861	238	4	0.846294	0.157544	0.688751	22.6543	chr3	69297633	69297896
chr1	200898353	200898431	79	6	0.910659	0.432535	0.478125	22.6443	.	-1	-1
chr1	122113943	122114017	75	6	0.205083	0.858851	-0.653768	-22.6341	.	-1	-1
chr2	24364971	24365173	203	6	0.724835	0.265417	0.459418	22.6252	.	-1	-1
chr15	22005386	22005482	97	6	0.923675	0.328967	0.594708	22.593	.	-1	-1
chr3	108106256	108106427	172	6	0.923496	0.429233	0.494263	22.5827	.	-1	-1
chr1	49972579	49972822	244	6	0.0327483	0.51178	-0.479032	-22.5594	.	-1	-1
chr18	19683531	19683596	66	7	0.813891	0.244049	0.569842	22.5309	.	-1	-1
chr1	122271957	122272196	240	7	0.919541	0.438022	0.481519	22.4638	.	-1	-1
chr3	92195990	92196047	58	7	0.370543	0.858851	-0.488308	-22.4513	.	-1	-1
chr14	46536252	46536495	244	7	0.178865	0.640815	-0.46195	-22.4418	.	-1	-1
chr11	126736696	126736765	70	6	0.188167	0.708121	-0.519955	-22.4276	.	-1	-1
chr7	6776598	6776704	107	6	0.950263	0.483559	0.466704	22.4262	.	-1	-1
chrX	59116934	59117033	100	6	0.205083	0.858851	-0.653768	-22.4129	.	-1	-1
chr19	4313983	4314074	92	7	0.796303	0.379037	0.417266	22.4102	.	-1	-1
chrX	3645040	3645094	55	6	0.540879	0.963678	-0.422799	-22.4038	.	-1	-1
chr7	94620744	94621041	298	4	0.897189	0.20624	0.690949	22.3827	.	-1	-1
chr22	18739276	18739353	78	6	0.961132	0.416392	0.54474	22.3667	.	-1	-1
chr4	73710214	73710381	168	6	0.780244	0.258356	0.521888	22.3512	.	-1	-1
chr2	142142854	142142953	100	4	0.854257	0.196064	0.658193	22.3357	chr2	142142679	142142903
chrX	61169347	61169407	61	5	0.151802	0.873841	-0.722039	-22.3162	.	-1	-1
chr2	214895404	214895454	51	4	0.944201	0.286054	0.658147	22.3084	.	-1	-1
chr11	117063261	117063461	201	6	0.675814	0.215092	0.460722	22.3004	.	-1	-1
chr15	92630993	92631098	106	4	0.943413	0.166089	0.777324	22.2678	.	-1	-1
chrX	50496470	50496558	89	6	0.679368	0.152579	0.526789	22.2535	.	-1	-1
chr1	40362771	40362928	158	4	0.951362	0.303658	0.647704	22.1899	.	-1	-1
chr15	101922559	101922664	106	6	0.171729	0.771432	-0.599703	-22.1649	.	-1	-1
chr10	40647859	40648100	242	7	0.912097	0.377875	0.534222	22.1169	.	-1	-1
chr8	32747825	32747947	123	6	0.263294	0.798824	-0.53553	-22.0722	.	-1	-1
chr11	106164064	106164232	169	4	0.122353	0.739827	-0.617474	-22.0547	.	-1	-1
chr2	148193291	148193945	655	6	0.785261	0.198383	0.586878	22.0452	.	-1	-1
chr4	183473697	183473751	55	7	0.90576	0.522893	0.382867	22.0083	.	-1	-1
chr11	36574985	36575175	191	6	0.889787	0.405561	0.484225	21.9963	.	-1	-1
chr1	31530372	31530580	209	6	0.663203	0.0983583	0.564845	21.9842	.	-1	-1
chr3	182568449	182568578	130	6	0.719349	0.203251	0.516098	21.9551	.	-1	-1
chr9	28168631	28168769	139	7	0.139774	0.58545	-0.445676	-21.9529	.	-1	-1
chr10	9743131	9743225	95	6	0.152599	0.644152	-0.491553	-21.9493	.	-1	-1
chr1	15966329	15966448	120	7	0.74694	0.341968	0.404972	21.9408	.	-1	-1
chr11	53700373	53700470	98	7	0.93069	0.433143	0.497547	21.9268	.	-1	-1
chr10	79520902	79521107	206	6	0.532268	0.0796284	0.45264	21.9239	chr10	79520733	79521091
chr3	8721526	8721648	123	6	0.897318	0.427074	0.470245	21.9201	.	-1	-1
chr16	37688958	37689047	90	7	0.807764	0.244049	0.563715	21.9096	.	-1	-1
chr1	201184681	201184735	55	6	0.648083	0.165023	0.483059	21.8972	.	-1	-1
chr4	51077016	51077196	181	6	0.68363	0.15569	0.52794	21.8767	.	-1	-1
chr12	81181916	81182108	193	6	0.666186	0.168757	0.497429	21.8359	.	-1	-1
chr17	24788587	24788667	81	6	0.295677	0.858851	-0.563174	-21.8232	.	-1	-1
chr8	45680370	45680468	99	5	0.95015	0.439257	0.510893	21.7923	.	-1	-1
chr13	53473353	53473520	168	7	0.319581	0.750641	-0.43106	-21.7762	.	-1	-1
chr11	51858764	51858940	177	7	0.953761	0.491384	0.462377	21.7618	.	-1	-1
chr6	133026323	133026395	73	7	0.701	0.236418	0.464582	21.7255	.	-1	-1
chr20	15952218	15952614	397	6	0.325441	0.86295	-0.537508	-21.7252	.	-1	-1
chr10	116888775	116888858	84	6	0.749669	0.269498	0.480171	21.712	.	-1	-1
chr18	18174111	18174224	114	4	0.931805	0.166089	0.765716	21.7106	.	-1	-1
chr8	91597397	91597516	120	6	0.385831	0.891231	-0.5054	-21.6832	.	-1	-1
chr2	93582633	93582685	53	6	0.24419	0.858851	-0.614661	-21.6667	.	-1	-1
chr16	36830625	36830695	71	7	0.231063	0.717379	-0.486316	-21.6622	.	-1	-1
chr5	175591478	175591538	61	6	0.827747	0.309815	0.517932	21.6548	.	-1	-1
chr13	81059971	81060308	338	6	0.904291	0.35364	0.550651	21.6427	.	-1	-1
chr3	84598155	84598208	54	6	0.909737	0.336195	0.573542	21.6398	.	-1	-1
chr9	44574263	44574365	103	7	0.903173	0.379051	0.524122	21.6268	.	-1	-1
chr6	59521276	59521357	82	7	0.838078	0.333929	0.504149	21.5517	.	-1	-1
chr6	11712997	11713054	58	7	0.875336	0.462296	0.41304	21.5427	.	-1	-1
chr1	121384100	121384182	83	5	0.860243	0.195186	0.665057	21.4992	.	-1	-1
chr9	22544922	22545048	127	6	0.298979	0.816199	-0.517219	-21.4942	.	-1	-1
chr9	70139227	70139390	164	6	0.886313	0.439109	0.447204	21.4478	.	-1	-1
chr11	53487727	53487824	98	6	0.85319	0.289315	0.563875	21.4441	.	-1	-1
chr3	39206371	39206568	198	5	0.834779	0.318185	0.516595	21.4335	.	-1	-1
chr3	63190760	63190815	56	6	0.43811	0.928623	-0.490513	-21.4304	.	-1	-1
chr14	93683201	93683289	89	6	0.635556	0.14086	0.494696	21.4167	.	-1	-1
chr9	27901428	27901555	128	4	0.164591	0.849547	-0.684956	-21.3698	.	-1	-1
chr2	191666767	191666962	196	6	0.753823	0.271433	0.48239	21.3602	.	-1	-1
chr3	79243660	79243713	54	4	0.816117	0.159883	0.656233	21.3501	.	-1	-1
chr14	45773423	45773485	63	6	0.189147	0.682408	-0.493261	-21.3444	.	-1	-1
chr16	37369326	37369412	87	6	0.700187	0.183398	0.516789	21.2791	.	-1	-1
chr9	43880636	43880781	146	5	0.769601	0.107894	0.661707	21.2729	.	-1	-1
chr16	37842874	37842960	87	5	0.932129	0.236644	0.695486	21.2686	.	-1	-1
chr4	31090384	31090642	259	6	0.849935	0.367723	0.482212	21.2547	.	-1	-1
chr22	10536204	10536295	92	7	0.853786	0.374203	0.479583	21.2357	.	-1	-1
chr2	93981718	93981872	155	5	0.188882	0.81826	-0.629379	-21.2339	.	-1	-1
chr6	59162055	59162150	96	5	0.924615	0.236644	0.687971	21.1897	.	-1	-1
chrX	132155250	132155434	185	6	0.467892	0.893647	-0.425755	-21.173	.	-1	-1
chrX	59794311	59794392	82	6	0.303138	0.858851	-0.555713	-21.1729	.	-1	-1
chr17	64344379	64344547	169	6	0.774639	0.291032	0.483607	21.1711	.	-1	-1
chr16	37532419	37532490	72	5	0.924615	0.236644	0.687971	21.1456	.	-1	-1
chr21	18087466	18087668	203	6	0.745512	0.247315	0.498197	21.1428	.	-1	-1
chr2	57141765	57141972	208	6	0.094238	0.583677	-0.489439	-21.1165	.	-1	-1
chr12	82791932	82792120	189	6	0.702342	0.20314	0.499202	21.0952	.	-1	-1
chr4	10947763	10947965	203	6	0.822652	0.338435	0.484218	21.0429	.	-1	-1
chr1	225548518	225548593	76	6	0.59599	0.146041	0.449949	20.978	.	-1	-1
chr6	44263568	44263769	202	6	0.856838	0.428092	0.428746	20.9351	.	-1	-1
chr11	46583966	46584289	324	6	0.879995	0.425132	0.454862	20.9009	.	-1	-1
chr10	14049249	14049433	185	6	0.579053	0.111454	0.467599	20.8841	chr10	14049272	14049561
chrX	147959019	147959077	59	6	0.514898	0.936996	-0.422098	-20.8729	.	-1	-1
chr15	18580375	18580569	195	6	0.237697	0.787227	-0.54953	-20.8665	.	-1	-1
chr17	22611594	22611789	196	4	0.744697	0.141141	0.603556	20.8418	.	-1	-1
chr3	99872675	99872879	205	6	0.704924	0.231741	0.473183	20.8253	.	-1	-1
chr12	36565026	36565119	94	6	0.926903	0.360671	0.566232	20.8164	.	-1	-1
chr17	24464422	24464520	99	4	0.149545	0.911455	-0.76191	-20.8064	.	-1	-1
chr2	219127022	219127245	224	6	0.466984	0.074304	0.39268	20.7629	.	-1	-1
chr7	59671962	59672302	341	6	0.677647	0.173182	0.504465	20.76	.	-1	-1
chr8	67255650	67255841	192	6	0.542422	0.952563	-0.410141	-20.7555	.	-1	-1
chrX	132408042	132408395	354	4	0.348536	0.953094	-0.604558	-20.7477	.	-1	-1
chr8	119067653	119067711	59	4	0.744219	0.0950052	0.649214	20.7416	.	-1	-1
chr2	121019326	121019415	90	6	0.829904	0.432688	0.397216	20.7242	.	-1	-1
chr17	46700785	46700878	94	6	0.795437	0.189649	0.605788	20.7175	.	-1	-1
chr4	157235432	157235696	265	6	0.462098	0.912461	-0.450364	-20.7072	.	-1	-1
chr4	50348746	50348816	71	5	0.890742	0.195186	0.695556	20.6502	.	-1	-1
chr11	87473741	87473869	129	6	0.336871	0.819279	-0.482408	-20.6475	.	-1	-1
chr12	25592032	25592275	244	6	0.921146	0.467746	0.4534	20.6079	.	-1	-1
chr16	36475616	36475725	110	4	0.924615	0.166089	0.758526	20.5998	.	-1	-1
chr16	37684427	37684616	190	7	0.810869	0.312844	0.498024	20.5682	.	-1	-1
chr18	19908177	19908266	90	5	0.85727	0.195186	0.662084	20.5473	.	-1	-1
chr15	65917220	65917278	59	6	0.573765	0.115146	0.45862	20.5407	chr15	65917115	65917419
chr15	25590147	25590389	243	6	0.688984	0.218128	0.470857	20.5245	.	-1	-1
chr14	28450083	28450203	121	4	0.185991	0.822905	-0.636914	-20.5217	.	-1	-1
chr1	218757989	218758261	273	5	0.382542	0.886563	-0.504021	-20.5049	.	-1	-1
chr18	17858376	17858465	90	4	0.924615	0.166089	0.758526	20.5021	.	-1	-1
chr12	36752779	36752865	87	5	0.943559	0.381905	0.561654	20.5003	.	-1	-1
chrX	58540942	58541035	94	6	0.880654	0.354264	0.52639	20.4703	.	-1	-1
chr4	158800106	158800220	115	6	0.557689	0.133068	0.42462	20.4682	.	-1	-1
chr3	5007036	5007104	69	6	0.8071	0.349467	0.457633	20.4654	.	-1	-1
chr18	34627132	34627319	188	6	0.725294	0.257129	0.468166	20.4517	.	-1	-1
chr12	35385714	35385954	241	6	0.852922	0.290317	0.562605	20.4311	.	-1	-1
chr4	51306454	51306601	148	4	0.87116	0.221894	0.649266	20.3635	.	-1	-1
chr4	182745499	182745587	89	6	0.164114	0.585302	-0.421188	-20.359	.	-1	-1
chr7	59140949	59141039	91	5	0.882765	0.212231	0.670534	20.3388	.	-1	-1
chr18	39469207	39469287	81	6	0.0842504	0.660821	-0.576571	-20.3386	.	-1	-1
chr12	65603680	65603741	62	6	0.798023	0.335193	0.46283	20.3343	.	-1	-1
chr8	26921655	26921747	93	6	0.438736	0.929435	-0.490699	-20.2717	.	-1	-1
chr17	24492155	24492213	59	4	0.924615	0.166089	0.758526	20.2637	.	-1	-1
chr9	43665780	43665835	56	4	0.924615	0.166089	0.758526	20.2637	.	-1	-1
chr11	13058934	13059056	123	6	0.784724	0.295757	0.488967	20.2584	.	-1	-1
chr7	60408452	60408608	157	5	0.866133	0.383804	0.482329	20.1936	.	-1	-1
chr9	68311228	68311311	84	5	0.735212	0.130816	0.604396	20.1593	.	-1	-1
chr9	82391636	82391813	178	6	0.344182	0.845138	-0.500956	-20.1473	.	-1	-1
chr7	74950432	74950534	103	6	0.95457	0.414544	0.540025	20.1205	.	-1	-1
chr9	65707885	65708105	221	6	0.964684	0.533784	0.4309	20.0994	.	-1	-1
chrX	68909506	68909769	264	6	0.789302	0.344356	0.444946	20.0984	.	-1	-1
chr12	35499667	35499752	86	5	0.216741	0.895943	-0.679202	-20.0696	.	-1	-1
chr3	23162288	23162406	119	6	0.472158	0.101091	0.371067	20.0617	chr3	23162101	23162466
chr4	179849310	179849371	62	5	0.872388	0.269931	0.602457	20.0288	.	-1	-1
chr14	37111271	37111344	74	6	0.917272	0.421335	0.495937	19.9974	.	-1	-1
chr3	75382977	75383149	173	6	0.840237	0.394647	0.445589	19.983	.	-1	-1
chrX	22370260	22370365	106	6	0.453963	0.902923	-0.448961	-19.9289	.	-1	-1
chr2	36621153	36621326	174	4	0.976154	0.381004	0.595149	19.9192	.	-1	-1
chr9	60570435	60570553	119	5	0.814343	0.332613	0.481731	19.8955	.	-1	-1
chr12	36351233	36351310	78	6	0.244169	0.858851	-0.614682	-19.8281	.	-1	-1
chr3	74471541	74471787	247	6	0.291517	0.728084	-0.436567	-19.8261	.	-1	-1
chr12	102694018	102694114	97	6	0.508408	0.949866	-0.441457	-19.817	.	-1	-1
chr6	71366452	71366503	52	4	0.909261	0.314108	0.595153	19.8156	.	-1	-1
chr2	92401390	92401910	521	5	0.882381	0.259889	0.622492	19.8144	.	-1	-1
chr4	9366757	9366812	56	6	0.876915	0.264761	0.612154	19.814	.	-1	-1
chr1	38138737	38138805	69	6	0.663808	0.223189	0.440618	19.8127	.	-1	-1
chr18	18668898	18668983	86	6	0.839434	0.264761	0.574673	19.7986	.	-1	-1
chr2	160325509	160325670	162	4	0.90937	0.31629	0.59308	19.7897	.	-1	-1
chr10	47412097	47412351	255	6	0.897909	0.469666	0.428242	19.7598	.	-1	-1
chr8	53695610	53695732	123	6	0.736104	0.24729	0.488814	19.7492	.	-1	-1
chrX	61795716	61795813	98	6	0.854089	0.342843	0.511246	19.6979	.	-1	-1
chr5	148902430	148902487	58	6	0.903236	0.393892	0.509345	19.6912	.	-1	-1
chr5	157554773	157554855	83	6	0.864288	0.402264	0.462024	19.6678	.	-1	-1
chr1	187056933	187057039	107	6	0.0583574	0.44565	-0.387292	-19.6448	.	-1	-1
chrX	71797208	71797274	67	7	0.836902	0.39406	0.442843	19.641	.	-1	-1
chr3	54398724	54398856	133	6	0.769954	0.307745	0.462209	19.6363	.	-1	-1
chr11	82996121	82996310	190	6	0.787592	0.319809	0.467783	19.6213	.	-1	-1
chrX	149339870	149339938	69	6	0.313683	0.806639	-0.492956	-19.5652	.	-1	-1
chr4	148813876	148814209	334	4	0.170373	0.767744	-0.597372	-19.4972	.	-1	-1
chr11	73147720	73147868	149	4	0.77407	0.18756	0.58651	19.4722	.	-1	-1
chr2	87909891	87909990	100	5	0.216741	0.890649	-0.673909	-19.4609	.	-1	-1
chr9	107219422	107219808	387	5	0.662647	0.139695	0.522951	19.4585	.	-1	-1
chr3	91696104	91696213	110	6	0.171729	0.734284	-0.562555	-19.4355	.	-1	-1
chr10	8768870	8768973	104	6	0.778865	0.294048	0.484817	19.4221	.	-1	-1
chr7	37944554	37944688	135	5	0.745929	0.253406	0.492523	19.4129	chr7	37944528	37944950
chr13	17693783	17693840	58	5	0.216741	0.892343	-0.675602	-19.4106	.	-1	-1
chr20	27603410	27603480	71	5	0.883487	0.248277	0.63521	19.3657	.	-1	-1
chr7	78545966	78546538	573	4	0.327604	0.933783	-0.606179	-19.3461	.	-1	-1
chrX	119768418	119768469	52	6	0.855931	0.455366	0.400564	19.3437	.	-1	-1
chr12	46056309	46056377	69	6	0.729289	0.265787	0.463502	19.3392	.	-1	-1
chr20	27847785	27847862	78	6	0.898354	0.331498	0.566856	19.3103	.	-1	-1
chr20	62376492	62376651	160	6	0.70102	0.293796	0.407225	19.3021	.	-1	-1
chr6	5888549	5888639	91	4	0.240501	0.906663	-0.666162	-19.207	.	-1	-1
chr1	159068599	159068683	85	6	0.418757	0.883085	-0.464328	-19.206	.	-1	-1
chr3	67154598	67154698	101	6	0.191366	0.645134	-0.453768	-19.1904	.	-1	-1
chr13	93914912	93915104	193	4	0.93455	0.37213	0.56242	19.1665	.	-1	-1
chr5	47197417	47197484	68	4	0.149545	0.891177	-0.741631	-19.1636	.	-1	-1
chr13	50984835	50984891	57	5	0.961019	0.474726	0.486293	19.129	.	-1	-1
chr7	154575527	154575588	62	4	0.152377	0.888744	-0.736367	-19.1186	.	-1	-1
chr5	156065110	156065186	77	6	0.173911	0.671134	-0.497222	-19.1148	.	-1	-1
chr12	30592904	30593081	178	5	0.815825	0.312866	0.502959	19.0941	.	-1	-1
chr17	25708180	25708282	103	4	0.906497	0.166089	0.740408	19.0512	.	-1	-1
chr10	98139513	98139743	231	6	0.730457	0.316958	0.413499	18.9845	.	-1	-1
chr16	36838863	36838973	111	6	0.724176	0.166089	0.558086	18.9642	.	-1	-1
chr7	83681305	83681378	74	4	0.888998	0.255039	0.633959	18.9629	.	-1	-1
chr10	65501450	65501547	98	6	0.730385	0.277515	0.45287	18.9574	chr10	65501260	65501468
chr1	32432103	32432264	162	4	0.691411	0.155863	0.535548	18.9255	chr1	32431958	32432318
chr9	83461741	83461884	144	6	0.87677	0.372759	0.504011	18.9149	.	-1	-1
chr20	28342029	28342112	84	6	0.780873	0.244049	0.536824	18.874	.	-1	-1
chr9	1599065	1599219	155	6	0.311544	0.772589	-0.461046	-18.8452	.	-1	-1
chr4	170598450	170598724	275	5	0.0626825	0.61638	-0.553697	-18.8001	.	-1	-1
chr4	25652457	25652670	214	5	0.912209	0.461795	0.450413	18.7806	.	-1	-1
chr10	40615079	40615165	87	6	0.797345	0.309929	0.487416	18.7761	.	-1	-1
chr21	7313986	7314049	64	6	0.300907	0.858851	-0.557944	-18.7542	.	-1	-1
chr2	92492945	92493046	102	6	0.795768	0.312844	0.482923	18.7358	.	-1	-1
chr8	45276353	45276437	85	6	0.697382	0.189649	0.507733	18.725	.	-1	-1
chr7	96554509	96554680	172	4	0.893731	0.291812	0.601919	18.7124	.	-1	-1
chr10	39840117	39840248	132	5	0.924615	0.353894	0.570721	18.6892	.	-1	-1
chrX	22210324	22210395	72	4	0.340913	0.912103	-0.571189	-18.6711	.	-1	-1
chr18	53455225	53455300	76	5	0.198996	0.750217	-0.551222	-18.6663	.	-1	-1
chr8	62337051	62337295	245	5	0.0775849	0.559367	-0.481782	-18.6203	.	-1	-1
chr11	61085050	61085291	242	5	0.949497	0.406544	0.542953	18.5869	.	-1	-1
chr1	171881180	171881434	255	4	0.705713	0.209187	0.496526	18.5741	chr1	171881433	171881703
chr2	138317565	138318172	608	4	0.394259	0.9479	-0.553641	-18.5441	.	-1	-1
chr5	132445966	132446136	171	5	0.722499	0.225982	0.496516	18.4777	.	-1	-1
chr1	243203456	243203518	63	6	0.78998	0.31929	0.470691	18.4325	.	-1	-1
chr2	93387884	93387971	88	5	0.72404	0.166089	0.557951	18.4311	.	-1	-1
chr17	23078188	23078263	76	5	0.820175	0.265776	0.554398	18.4023	.	-1	-1
chr14	81993782	81993861	80	5	0.0314507	0.54866	-0.517209	-18.4	.	-1	-1
chr3	185317979	185318265	287	4	0.700696	0.151457	0.549239	18.3914	.	-1	-1
chr12	35898237	35898323	87	6	0.425426	0.917879	-0.492453	-18.3885	.	-1	-1
chr12	29798003	29798097	95	4	0.916557	0.321116	0.595441	18.3559	.	-1	-1
chr20	14764968	14765029	62	4	0.327863	0.929264	-0.601401	-18.3395	.	-1	-1
chr7	33737671	33737966	296	4	0.799996	0.261052	0.538943	18.3162	.	-1	-1
chr2	106134484	106134609	126	6	0.951012	0.485532	0.465481	18.2988	.	-1	-1
chr1_KI270712v1_random	41058	41154	97	5	0.924615	0.315162	0.609453	18.2895	.	-1	-1
chr11	51224893	51224951	59	6	0.801608	0.349028	0.452581	18.2875	.	-1	-1
chr1	143536612	143536675	64	5	0.934089	0.392648	0.541441	18.2581	.	-1	-1
chrX	62351067	62351159	93	6	0.452514	0.86112	-0.408607	-18.225	.	-1	-1
chr9	29418890	29418947	58	4	0.112121	0.753924	-0.641802	-18.2115	.	-1	-1
chr11	73258547	73258617	71	5	0.867196	0.417	0.450196	18.1869	.	-1	-1
chr11	52923827	52924544	718	8	0.878858	0.549338	0.32952	18.1843	.	-1	-1
chrUn_GL000218v1	122033	122109	77	4	0.274943	0.901684	-0.626741	-18.1842	.	-1	-1
chr9	28973826	28973919	94	4	0.240105	0.857177	-0.617072	-18.1665	.	-1	-1
chr11	51386032	51386130	99	5	0.888345	0.236644	0.651702	18.0532	.	-1	-1
chr20	9073083	9073145	63	4	0.748337	0.204988	0.543349	18.0388	chr20	9072939	9073171
chr15	50567283	50567452	170	4	0.862935	0.30361	0.559325	18.0026	.	-1	-1
chr14	34540906	34540972	67	6	0.918085	0.506265	0.41182	17.9816	.	-1	-1
chr8	44912242	44912339	98	4	0.185486	0.911455	-0.725968	-17.979	.	-1	-1
chrX	97019906	97019960	55	4	0.896633	0.264617	0.632016	17.9349	.	-1	-1
chr3	104276379	104276786	408	4	0.357431	0.908944	-0.551513	-17.9238	.	-1	-1
chr14	35375763	35375840	78	5	0.873474	0.42002	0.453454	17.8983	.	-1	-1
chr16	14787453	14787530	78	5	0.888345	0.236644	0.651702	17.8739	.	-1	-1
chr9	84759390	84759469	80	4	0.960724	0.401768	0.558956	17.8729	.	-1	-1
chr9	44210855	44210910	56	4	0.924615	0.204126	0.720489	17.8725	.	-1	-1
chr16	37108924	37109033	110	5	0.910786	0.324557	0.586229	17.8258	.	-1	-1
chr4	14575758	14575816	59	4	0.030268	0.641209	-0.610941	-17.8144	.	-1	-1
chr1	248434970	248435036	67	6	0.174423	0.69923	-0.524807	-17.7772	.	-1	-1
chr18	20008713	20008801	89	6	0.353596	0.834231	-0.480634	-17.7167	.	-1	-1
chr11	103137658	103137943	286	4	0.923009	0.374211	0.548798	17.7098	.	-1	-1
chr6	117441120	117441270	151	4	0.648185	0.108457	0.539728	17.7074	.	-1	-1
chr15	19097767	19102456	4690	5	0.175511	0.769921	-0.59441	-17.6678	.	-1	-1
chr4	180293357	180293448	92	5	0.412106	0.938476	-0.52637	-17.634	.	-1	-1
chr18	17227993	17228082	90	4	0.924615	0.204126	0.720489	17.6137	.	-1	-1
chr13	90694889	90694995	107	5	0.106732	0.556706	-0.449973	-17.6072	.	-1	-1
chr18	16978778	16978863	86	5	0.910786	0.3307	0.580085	17.5822	.	-1	-1
chr13	47240964	47241068	105	5	0.861245	0.391088	0.470157	17.5699	.	-1	-1
chr4	116372462	116372513	52	5	0.441943	0.917022	-0.475079	-17.5674	.	-1	-1
chr2	58831191	58831689	499	4	0.238865	0.78598	-0.547115	-17.5573	.	-1	-1
chr12	120849877	120850013	137	4	0.888411	0.308119	0.580291	17.5475	.	-1	-1
chr3	84510082	84510163	82	4	0.0947287	0.663403	-0.568674	-17.5421	.	-1	-1
chr18	18750557	18750607	51	6	0.78892	0.244049	0.544871	17.5338	.	-1	-1
chr1	177702147	177702378	232	4	0.69146	0.167601	0.523859	17.5231	.	-1	-1
chr2	143011614	143011830	217	5	0.81065	0.354539	0.456111	17.5043	.	-1	-1
chr13	83006618	83006849	232	5	0.124364	0.54673	-0.422367	-17.474	.	-1	-1
chr10	45710367	45710425	59	4	0.726181	0.198505	0.527676	17.4701	chr10	45710286	45710488
chr3	92862432	92862524	93	6	0.814092	0.264761	0.549331	17.4618	.	-1	-1
chr5	130807435	130807660	226	4	0.212232	0.766485	-0.554253	-17.4581	.	-1	-1
chr7	117110431	117110674	244	4	0.596456	0.0729142	0.523542	17.4433	.	-1	-1
chr3	118907979	118908176	198	4	0.787981	0.212465	0.575516	17.441	.	-1	-1
chr8	87326854	87327063	210	5	0.0892333	0.507736	-0.418502	-17.4104	.	-1	-1
chr11	50565915	50565986	72	5	0.0579946	0.534942	-0.476947	-17.4047	.	-1	-1
chr2	74688778	74689053	276	4	0.378187	0.880607	-0.502419	-17.3315	.	-1	-1
chr16	3065424	3065493	70	5	0.547107	0.126484	0.420623	17.3124	chr16	3065203	3065433
chr13	16495820	16495884	65	4	0.887595	0.264063	0.623532	17.3092	.	-1	-1
chr2	210928901	210929158	258	5	0.135025	0.565592	-0.430567	-17.2738	.	-1	-1
chr8	109898329	109898574	246	5	0.754239	0.280584	0.473656	17.2668	.	-1	-1
chr7	89588424	89588545	122	4	0.079373	0.628691	-0.549318	-17.2549	.	-1	-1
chr3	73519665	73519755	91	5	0.972746	0.473001	0.499745	17.2438	.	-1	-1
chr9	27663725	27663821	97	5	0.279682	0.775543	-0.495861	-17.2269	.	-1	-1
chr20	12197318	12197434	117	5	0.327759	0.820902	-0.493144	-17.2115	.	-1	-1
chr18	18453335	18453529	195	4	0.88859	0.40249	0.4861	17.1839	.	-1	-1
chr4	105308556	105308719	164	5	0.70606	0.262332	0.443727	17.1076	.	-1	-1
chr3	131731926	131731981	56	4	0.983875	0.425892	0.557984	17.0747	chr3	131731811	131732103
chr5	75849516	75849854	339	4	0.782039	0.236597	0.545442	17.0401	.	-1	-1
chrX	54903643	54903746	104	4	0.30945	0.873976	-0.564527	-17.0287	.	-1	-1
chr3	29034094	29034200	107	4	0.440033	0.944524	-0.504491	-17.0014	.	-1	-1
chr9	74264230	74264304	75	4	0.1137	0.755912	-0.642212	-16.9907	.	-1	-1
chr18	55716638	55716820	183	4	0.850657	0.341916	0.508741	16.9767	.	-1	-1
chr4	31378233	31378289	57	4	0.809401	0.26461	0.544792	16.973	.	-1	-1
chr16	36843386	36843575	190	5	0.931751	0.413573	0.518178	16.9344	.	-1	-1
chr3	92473687	92473790	104	5	0.43526	0.944248	-0.508988	-16.9325	.	-1	-1
chr2	92311151	92311235	85	4	0.284092	0.909853	-0.625761	-16.9256	.	-1	-1
chr2	137858463	137858516	54	4	0.362264	0.946624	-0.58436	-16.9213	.	-1	-1
chr2	132813981	132814229	249	4	0.327315	0.864518	-0.537203	-16.9161	.	-1	-1
chr12	59916342	59916462	121	5	0.271689	0.752812	-0.481122	-16.9055	.	-1	-1
chr15	49826486	49826570	85	4	0.316635	0.864518	-0.547883	-16.9032	.	-1	-1
chr9	116415324	116415393	70	4	0.739515	0.162157	0.577358	16.8982	.	-1	-1
chr14	35458095	35458171	77	4	0.859674	0.273958	0.585716	16.8973	.	-1	-1
chr12	90828833	90828919	87	5	0.507843	0.932556	-0.424713	-16.8958	.	-1	-1
chr3	669464	669634	171	5	0.145169	0.570545	-0.425376	-16.8835	.	-1	-1
chr7	73013138	73013245	108	5	0.941129	0.370375	0.570754	16.867	.	-1	-1
chr7	71851078	71851133	56	4	0.230184	0.871227	-0.641043	-16.8352	.	-1	-1
chr4	110082169	110082307	139	5	0.809805	0.353528	0.456277	16.8345	.	-1	-1
chr20	51264055	51264116	62	5	0.336328	0.82928	-0.492952	-16.7681	.	-1	-1
chr2	135293895	135293990	96	5	0.927763	0.46942	0.458343	16.7632	.	-1	-1
chr22	11931924	11932042	119	5	0.0885222	0.510419	-0.421897	-16.756	.	-1	-1
chr13	48207315	48207403	89	4	0.841691	0.293954	0.547737	16.6961	chr13	48207258	48207434
chrX	23243404	23243468	65	4	0.189878	0.891177	-0.701299	-16.6847	.	-1	-1
chr18	29101070	29101159	90	5	0.222418	0.676986	-0.454568	-16.6839	.	-1	-1
chr4	156277503	156277640	138	4	0.139662	0.692234	-0.552572	-16.6732	.	-1	-1
chr10	65109927	65110056	130	4	0.67465	0.121669	0.552981	16.6588	.	-1	-1
chrUn_GL000213v1	143593	143726	134	4	0.206962	0.768531	-0.561569	-16.6431	.	-1	-1
chr16	80089280	80089375	96	5	0.220091	0.736054	-0.515963	-16.6001	.	-1	-1
chr15	18849036	18849116	81	5	0.176979	0.762512	-0.585532	-16.5636	.	-1	-1
chr12	49253008	49253176	169	5	0.88665	0.486574	0.400076	16.5623	chr12	49253083	49253271
chr17	26092490	26092588	99	4	0.231553	0.850426	-0.618873	-16.5556	.	-1	-1
chr9	85428383	85428448	66	5	0.725096	0.257403	0.467693	16.5463	.	-1	-1
chr18	31267783	31268037	255	4	0.646055	0.177691	0.468365	16.5405	.	-1	-1
chr15	60582397	60582499	103	4	0.908061	0.382821	0.525239	16.5349	.	-1	-1
chr12	68560421	68560556	136	4	0.835749	0.263312	0.572436	16.5251	.	-1	-1
chr18	58911767	58911866	100	5	0.828483	0.436369	0.392114	16.4982	.	-1	-1
chrX	8628744	8628831	88	5	0.520239	0.906743	-0.386505	-16.4929	.	-1	-1
chr20	17332073	17332249	177	5	0.45682	0.877107	-0.420287	-16.475	.	-1	-1
chr12	62860230	62860294	65	5	0.902988	0.499631	0.403356	16.4535	.	-1	-1
chr16	75000996	75001086	91	4	0.819713	0.301915	0.517798	16.4259	chr16	75000907	75001087
chr2	170277704	170277852	149	4	0.454813	0.950758	-0.495945	-16.4239	.	-1	-1
chr11	21397920	21397990	71	5	0.0604829	0.446801	-0.386318	-16.4152	.	-1	-1
chr3	63687446	63687508	63	5	0.934957	0.537938	0.397019	16.3734	.	-1	-1
chrX	152758482	152758552	71	4	0.906497	0.208725	0.697773	16.3669	.	-1	-1
chr3	76663213	76663386	174	4	0.969471	0.403179	0.566293	16.3347	.	-1	-1
chr18	19421630	19421720	91	5	0.176979	0.762382	-0.585402	-16.3333	.	-1	-1
chr8	89744840	89744954	115	5	0.840021	0.43128	0.408741	16.321	.	-1	-1
chr1	205576873	205576968	96	5	0.786236	0.31081	0.475426	16.3207	.	-1	-1
chrX	50961370	50961588	219	4	0.842567	0.314082	0.528486	16.31	.	-1	-1
chr16	36606300	36606371	72	5	0.707287	0.166089	0.541198	16.2753	.	-1	-1
chrX	46318568	46318652	85	5	0.370155	0.79151	-0.421355	-16.2639	.	-1	-1
chr4	78613807	78614058	252	5	0.779399	0.340803	0.438596	16.2589	.	-1	-1
chrX	71990049	71990132	84	5	0.746129	0.318687	0.427442	16.2511	chrX	71989931	71990146
chr9	9588199	9588266	68	5	0.123114	0.638315	-0.515201	-16.2261	.	-1	-1
chr3	67666702	67666792	91	4	0.964468	0.407517	0.556952	16.2251	.	-1	-1
chr18	59909487	59909621	135	5	0.599897	0.194466	0.405431	16.2231	.	-1	-1
chr1	148827455	148828474	1020	4	0.944027	0.480245	0.463782	16.2053	.	-1	-1
chr9	9976455	9977215	761	4	0.385967	0.933783	-0.547816	-16.202	.	-1	-1
chr3	92142324	92142424	101	5	0.216741	0.839819	-0.623078	-16.1977	.	-1	-1
chr19	23752844	23753054	211	5	0.305775	0.766514	-0.460738	-16.1795	.	-1	-1
chr5	91277964	91278105	142	5	0.826177	0.37007	0.456107	16.1772	.	-1	-1
chrX	65835871	65836084	214	4	0.515941	0.96713	-0.451189	-16.176	.	-1	-1
chr14	25699112	25699175	64	4	0.217704	0.782423	-0.564719	-16.1684	.	-1	-1
chr4	140980972	140981143	172	4	0.898278	0.366282	0.531996	16.1584	.	-1	-1
chr4	106798189	106798255	67	4	0.411781	0.920756	-0.508975	-16.1561	.	-1	-1
chrX	131919310	131919416	107	4	0.381341	0.904456	-0.523115	-16.1438	.	-1	-1
chrX	84710183	84710301	119	4	0.436306	0.933783	-0.497478	-16.1431	.	-1	-1
chr9	67456440	67456547	108	5	0.779159	0.27257	0.506589	16.1356	.	-1	-1
chr3	78848899	78849123	225	5	0.688216	0.258906	0.42931	16.1244	chr3	78849001	78849230
chr3	420728	420787	60	4	0.618995	0.109757	0.509238	16.1147	.	-1	-1
chr18	17582198	17582260	63	5	0.859082	0.236644	0.622439	16.1028	.	-1	-1
chr13	59826586	59826718	133	5	0.861935	0.428175	0.43376	16.0898	.	-1	-1
chr10	111993287	111993353	67	4	0.166469	0.747384	-0.580915	-16.0782	.	-1	-1
chr15	49885088	49885184	97	4	0.712709	0.162541	0.550168	16.0655	.	-1	-1
chr12	85540975	85541161	187	4	0.77008	0.259227	0.510854	16.0542	.	-1	-1
chr12	35300272	35300357	86	5	0.911673	0.555054	0.356619	16.0537	.	-1	-1
chr2	131486403	131486456	54	5	0.926892	0.572521	0.354371	15.9937	.	-1	-1
chr8	88260201	88260432	232	4	0.66929	0.137764	0.531526	15.9838	.	-1	-1
chr2	168404852	168404997	146	4	0.565752	0.0916412	0.474111	15.9745	.	-1	-1
chr18	36516792	36517133	342	4	0.913576	0.476732	0.436844	15.9697	.	-1	-1
chr4	51390963	51394206	3244	5	0.940833	0.429979	0.510854	15.9477	.	-1	-1
chr16	37410611	37410850	240	5	0.862387	0.315162	0.547225	15.9429	.	-1	-1
chr5	35358395	35358670	276	4	0.773312	0.222354	0.550958	15.8878	.	-1	-1
chr18	15874106	15874190	85	4	0.298601	0.911455	-0.612854	-15.8652	.	-1	-1
chr14	24381586	24381668	83	5	0.914392	0.546702	0.36769	15.8561	.	-1	-1
chrY	2998435	2998508	74	5	0.377157	0.809623	-0.432466	-15.831	.	-1	-1
chr20	13024741	13024813	73	4	0.900207	0.309399	0.590807	15.8249	.	-1	-1
chrX	129564149	129564314	166	4	0.826779	0.343621	0.483158	15.8078	.	-1	-1
chr3	140214788	140214862	75	4	0.870517	0.364776	0.505741	15.7843	.	-1	-1
chrX	139715346	139715396	51	4	0.793877	0.283037	0.510839	15.7809	.	-1	-1
chr15	69861728	69861857	130	5	0.708875	0.302357	0.406518	15.7536	.	-1	-1
chr2	192177623	192177852	230	4	0.973825	0.485255	0.48857	15.7512	.	-1	-1
chr8	81055564	81055631	68	4	0.981191	0.450556	0.530635	15.7478	.	-1	-1
chr9	16808558	16808634	77	5	0.982619	0.462791	0.519828	15.7423	.	-1	-1
chr10	38335387	38335457	71	4	0.805432	0.265931	0.539501	15.7219	.	-1	-1
chr11	6794356	6794428	73	4	0.213936	0.786518	-0.572582	-15.7081	.	-1	-1
chr1	157640196	157640299	104	4	0.362438	0.878653	-0.516216	-15.7025	.	-1	-1
chr11	120387364	120387589	226	4	0.742333	0.213001	0.529332	15.7002	.	-1	-1
chr8	55789423	55789642	220	5	0.791094	0.317072	0.474022	15.6843	.	-1	-1
chr2	190845248	190845306	59	5	0.790326	0.325632	0.464693	15.6676	.	-1	-1
chrX	103891086	103891166	81	4	0.308295	0.808128	-0.499833	-15.6512	.	-1	-1
chr12	126231106	126231207	102	4	0.0578116	0.514407	-0.456595	-15.6435	.	-1	-1
chr12	36357257	36357373	117	4	0.84684	0.295297	0.551543	15.6354	.	-1	-1
chr5	12581210	12581271	62	5	0.0313582	0.361112	-0.329754	-15.6287	.	-1	-1
chr5	44971243	44972350	1108	4	0.378245	0.818735	-0.44049	-15.5932	.	-1	-1
chr13	108944542	108944654	113	4	0.54453	0.973039	-0.428509	-15.5908	.	-1	-1
chr5	81618866	81618941	76	5	0.7931	0.322219	0.47088	15.5826	.	-1	-1
chr1	122326077	122326128	52	4	0.84592	0.204126	0.641794	15.5685	.	-1	-1
chr7	80715828	80715884	57	5	0.977052	0.566516	0.410537	15.5667	.	-1	-1
chr9	44411159	44411214	56	4	0.799258	0.166089	0.633169	15.5645	.	-1	-1
chrX	55457576	55457683	108	4	0.753814	0.142138	0.611677	15.5477	.	-1	-1
chrX	51350857	51350916	60	4	0.437455	0.923367	-0.485912	-15.5346	.	-1	-1
chrX	36132728	36132786	59	4	0.0545076	0.582123	-0.527615	-15.5295	.	-1	-1
chr3	98681535	98681619	85	5	0.807734	0.387216	0.420517	15.5214	.	-1	-1
chrX	59659368	59659461	94	5	0.413147	0.910394	-0.497247	-15.5129	.	-1	-1
chr20	47487418	47487482	65	4	0.872632	0.338566	0.534066	15.5105	.	-1	-1
chr12	16602926	16602992	67	4	0.517931	0.962829	-0.444899	-15.4912	.	-1	-1
chrX	60887304	60887396	93	5	0.769601	0.195186	0.574415	15.4713	.	-1	-1
chr2	209352802	209352923	122	5	0.831706	0.427603	0.404104	15.4696	.	-1	-1
chr16	23935375	23935504	130	4	0.837167	0.283637	0.55353	15.4688	.	-1	-1
chr6	48055681	48055795	115	4	0.208414	0.738045	-0.529632	-15.4504	.	-1	-1
chr1	122396336	122396578	243	4	0.926721	0.305845	0.620876	15.4416	.	-1	-1
chr13	21664497	21664568	72	4	0.519762	0.0617234	0.458039	15.4326	.	-1	-1
chr13	80884833	80884895	63	4	0.843751	0.304944	0.538807	15.4184	.	-1	-1
chr7	28405957	28406113	157	4	0.776356	0.258413	0.517943	15.383	.	-1	-1
chr2	129383745	129383916	172	4	0.676656	0.141072	0.535585	15.3746	.	-1	-1
chr12	31746893	31746946	54	4	0.603559	0.127569	0.47599	15.3662	.	-1	-1
chr14	47482887	47482938	52	4	0.113725	0.649972	-0.536247	-15.3529	.	-1	-1
chrX	155675108	155675238	131	4	0.290342	0.816387	-0.526045	-15.3498	.	-1	-1
chr6	49739636	49739740	105	4	0.140192	0.695839	-0.555646	-15.3068	.	-1	-1
chr15	21004527	21004626	100	5	0.761296	0.255713	0.505583	15.2568	.	-1	-1
chr5	151085807	151085860	54	5	0.782609	0.380555	0.402054	15.2287	.	-1	-1
chr18	19777917	19777993	77	4	0.254284	0.891177	-0.636893	-15.2252	.	-1	-1
chr14	48390117	48390299	183	4	0.811497	0.295752	0.515745	15.2179	.	-1	-1
chr13	50136300	50136378	79	4	0.778755	0.267207	0.511548	15.2132	.	-1	-1
chr1	175518333	175518391	59	4	0.652155	0.112839	0.539316	15.2052	.	-1	-1
chr9	44318760	44318849	90	5	0.814774	0.264761	0.550013	15.1808	.	-1	-1
chr16	36492190	36492275	86	5	0.731371	0.278858	0.452514	15.179	.	-1	-1
chr2	132987830	132987940	111	4	0.473302	0.96171	-0.488407	-15.1603	.	-1	-1
chr17	38701121	38701183	63	4	0.747077	0.270987	0.476089	15.1602	.	-1	-1
chr10	58281603	58281745	143	4	0.92639	0.388197	0.538192	15.1595	.	-1	-1
chr10	41449652	41449737	86	5	0.769895	0.244049	0.525846	15.1592	.	-1	-1
chr11	53884738	53884806	69	4	0.93586	0.264761	0.671098	15.1418	.	-1	-1
chr9	29719153	29719209	57	4	0.109164	0.616847	-0.507683	-15.14	.	-1	-1
chr11	52481904	52482001	98	4	0.346201	0.933783	-0.587582	-15.1297	.	-1	-1
chr13	97942905	97942991	87	4	0.789408	0.303849	0.485559	15.1204	.	-1	-1
chr1	116805427	116805587	161	4	0.510213	0.926162	-0.415949	-15.1077	.	-1	-1
chrX	66821348	66821420	73	4	0.0335455	0.517608	-0.484062	-15.0633	.	-1	-1
chr2	138735876	138736066	191	4	0.57983	0.0924349	0.487395	15.0569	.	-1	-1
chr9	43996774	43996864	91	5	0.727334	0.166089	0.561245	15.0493	.	-1	-1
chr1	195837731	195837965	235	4	0.32276	0.826185	-0.503424	-15.005	.	-1	-1
chr4	102044858	102044957	100	4	0.81341	0.292281	0.521129	14.9897	.	-1	-1
chr5	60206823	60207124	302	4	0.248446	0.714895	-0.46645	-14.9836	.	-1	-1
chr1	111965416	111965490	75	4	0.28504	0.891177	-0.606136	-14.9596	.	-1	-1
chr6	59049411	59049495	85	4	0.924615	0.301665	0.62295	14.9492	.	-1	-1
chr2	176521701	176521782	82	4	0.946003	0.453792	0.492211	14.8736	.	-1	-1
chr11	40537212	40537262	51	4	0.0374857	0.426657	-0.389171	-14.8684	.	-1	-1
chr3	116496917	116497147	231	4	0.0946437	0.661523	-0.566879	-14.8485	.	-1	-1
chr17	10831171	10831223	53	4	0.907601	0.347491	0.56011	14.8383	.	-1	-1
chr11	54406948	54407065	118	5	0.661504	0.166089	0.495415	14.834	.	-1	-1
chr8	30341995	30342148	154	4	0.955099	0.526612	0.428487	14.8284	.	-1	-1
chr6	70769819	70769892	74	4	0.974923	0.510459	0.464464	14.7941	.	-1	-1
chr6	81900459	81900610	152	4	0.354957	0.830449	-0.475493	-14.7866	.	-1	-1
chr12	116517938	116518029	92	4	0.880899	0.393822	0.487078	14.7837	.	-1	-1
chr13	53990469	53990663	195	4	0.358098	0.854926	-0.496827	-14.7753	.	-1	-1
chr2	78965074	78965126	53	4	0.10568	0.56297	-0.457291	-14.7749	.	-1	-1
chr9	10257693	10257744	52	4	0.374848	0.856967	-0.482119	-14.7567	.	-1	-1
chr6	8705651	8705772	122	4	0.543425	0.0536307	0.489794	14.7432	.	-1	-1
chr20	29209897	29210017	121	4	0.163077	0.696656	-0.533579	-14.7135	.	-1	-1
chr9	78997861	78998022	162	4	0.106585	0.604437	-0.497852	-14.6971	.	-1	-1
chr1	122971025	122971111	87	4	0.744356	0.264342	0.480014	14.6955	.	-1	-1
chrX	55481558	55481636	79	4	0.787243	0.286612	0.500631	14.6952	.	-1	-1
chr1	191694927	191695017	91	4	0.701122	0.160055	0.541066	14.6903	.	-1	-1
chr2	90365115	90365168	54	5	0.501986	0.121815	0.380171	14.6822	.	-1	-1
chr4	126501077	126501273	197	4	0.870654	0.432233	0.438421	14.6734	.	-1	-1
chr6	65754082	65754199	118	4	0.736791	0.25156	0.485231	14.6656	.	-1	-1
chr9	78767123	78767197	75	4	0.965719	0.481875	0.483843	14.6634	.	-1	-1
chr4	51437736	51437982	247	4	0.691822	0.160326	0.531496	14.6632	.	-1	-1
chr3	86104863	86105033	171	4	0.456651	0.915726	-0.459076	-14.6294	.	-1	-1
chrX	11001446	11001545	100	4	0.772696	0.228378	0.544318	14.6076	.	-1	-1
chr13	17271666	17271753	88	4	0.0980111	0.725113	-0.627102	-14.6027	.	-1	-1
chr5	125191382	125191477	96	4	0.544264	0.964413	-0.420148	-14.5961	.	-1	-1
chr4	51733152	51733238	87	4	0.909196	0.348757	0.560439	14.5922	.	-1	-1
chr18	40753898	40753951	54	4	0.805951	0.208725	0.597227	14.5626	.	-1	-1
chr8	8473580	8473711	132	4	0.337994	0.911455	-0.573461	-14.5531	.	-1	-1
chr1	237079354	237079416	63	4	0.87842	0.360293	0.518127	14.5431	.	-1	-1
chr2	139472906	139472973	68	4	0.378786	0.909853	-0.531067	-14.5253	.	-1	-1
chr3	90961017	90961070	54	5	0.850689	0.379418	0.471271	14.5152	.	-1	-1
chr7	54393091	54393156	66	4	0.819995	0.301071	0.518924	14.5135	.	-1	-1
chr9	29041003	29041421	419	4	0.471798	0.947534	-0.475736	-14.5072	.	-1	-1
chr4	125851371	125851428	58	5	0.982515	0.675588	0.306928	14.4989	.	-1	-1
chr17	33824201	33824260	60	5	0.197966	0.664351	-0.466384	-14.4984	.	-1	-1
chr6	52734399	52734835	437	4	0.556596	0.957374	-0.400778	-14.4853	.	-1	-1
chr2	238456244	238456456	213	4	0.869105	0.394887	0.474218	14.4805	.	-1	-1
chr8	121619023	121619147	125	4	0.563137	0.969381	-0.406245	-14.4792	.	-1	-1
chr6	123225125	123225573	449	4	0.207646	0.680506	-0.47286	-14.4611	.	-1	-1
chr6	23987474	23987626	153	4	0.154776	0.627571	-0.472795	-14.4356	.	-1	-1
chrX	138560022	138560091	70	4	0.101359	0.669085	-0.567726	-14.4233	.	-1	-1
chr12	74877650	74877725	76	5	0.189878	0.664821	-0.474943	-14.4128	.	-1	-1
chr7	113260439	113260538	100	4	0.466801	0.0561634	0.410638	14.4078	.	-1	-1
chrX	85946341	85946392	52	4	0.354226	0.785226	-0.430999	-14.398	.	-1	-1
chr18	44356950	44357020	71	4	0.351728	0.868123	-0.516394	-14.3933	.	-1	-1
chr4	172538854	172539260	407	4	0.886736	0.463276	0.423461	14.3928	.	-1	-1
chr1	245654700	245654765	66	4	0.820359	0.336849	0.483511	14.3844	.	-1	-1
chr4	39937109	39937252	144	4	0.894762	0.44987	0.444891	14.3344	.	-1	-1
chr14	44388807	44388941	135	4	0.23464	0.759654	-0.525014	-14.3172	.	-1	-1
chr12	86803601	86803687	87	4	0.823025	0.314735	0.50829	14.3165	.	-1	-1
chr10	75806604	75806686	83	4	0.978592	0.53945	0.439142	14.2975	.	-1	-1
chr2	196053352	196053416	65	4	0.905158	0.382735	0.522423	14.281	.	-1	-1
chr3	24866885	24867039	155	4	0.418271	0.899852	-0.481581	-14.269	.	-1	-1
chr6	154981159	154981216	58	4	0.861102	0.422825	0.438277	14.2684	.	-1	-1
chr13	68777081	68777254	174	4	0.754957	0.253337	0.50162	14.2653	.	-1	-1
chr14_GL000009v2_random	1977	2047	71	5	0.383896	0.839819	-0.455923	-14.2513	.	-1	-1
chr22_KI270731v1_random	70948	71021	74	4	0.950599	0.352431	0.598169	14.238	.	-1	-1
chr11	56380316	56380428	113	4	0.186894	0.707959	-0.521065	-14.2376	.	-1	-1
chr1	182791295	182791409	115	4	0.701365	0.242791	0.458574	14.2362	.	-1	-1
chr11	5199214	5199269	56	4	0.0861505	0.594083	-0.507932	-14.2303	.	-1	-1
chr4	96977953	96978134	182	4	0.455403	0.896139	-0.440736	-14.2046	.	-1	-1
chr12	36580054	36580140	87	4	0.961152	0.460772	0.500379	14.1842	.	-1	-1
chr6	49283869	49283925	57	5	0.074333	0.448988	-0.374655	-14.1804	.	-1	-1
chr9	22530848	22530927	80	4	0.240066	0.725318	-0.485253	-14.1626	.	-1	-1
chr8	68664001	68664614	614	4	0.924845	0.464595	0.46025	14.1589	.	-1	-1
chrX	127968575	127968667	93	4	0.623082	0.164254	0.458828	14.1548	.	-1	-1
chr9	73647263	73647324	62	4	0.470706	0.959135	-0.488429	-14.1544	.	-1	-1
chr14	27466310	27466426	117	4	0.328258	0.844088	-0.515831	-14.1409	.	-1	-1
chr13	47592581	47592744	164	4	0.309275	0.822442	-0.513166	-14.1159	.	-1	-1
chr15	19279354	19284356	5003	15	0.599922	0.473234	0.126688	14.1115	.	-1	-1
chr16	70846217	70846292	76	5	0.135951	0.550484	-0.414533	-14.0999	.	-1	-1
chr1	51220615	51220817	203	4	0.702363	0.273791	0.428572	14.0911	.	-1	-1
chr15	73363210	73363309	100	4	0.752894	0.253123	0.49977	14.075	chr15	73362953	73363216
chr10	53997357	53997457	101	4	0.947813	0.49466	0.453153	14.0652	.	-1	-1
chr4	179818086	179818147	62	4	0.870412	0.3536	0.516812	14.0603	.	-1	-1
chr12	86551605	86551717	113	4	0.55267	0.963305	-0.410635	-14.0598	.	-1	-1
chr3	43116246	43116453	208	4	0.873491	0.384533	0.488958	14.0443	.	-1	-1
chr14	45822207	45822261	55	5	0.0337621	0.417795	-0.384033	-14.0179	.	-1	-1
chr18	20584947	20584998	52	5	0.89907	0.496995	0.402076	14.0146	.	-1	-1
chr11	55680775	55680957	183	4	0.0396444	0.402314	-0.362669	-14.0103	.	-1	-1
chr12	99787216	99787326	111	4	0.72556	0.245298	0.480262	13.9447	.	-1	-1
chr4	11244020	11244091	72	4	0.619225	0.141353	0.477872	13.9399	.	-1	-1
chr12	33413486	33413708	223	4	0.412339	0.853938	-0.441599	-13.9392	.	-1	-1
chr10	77290821	77290947	127	4	0.879103	0.446825	0.432278	13.9188	.	-1	-1
chr6	130526993	130527104	112	4	0.0397171	0.515602	-0.475885	-13.9187	.	-1	-1
chrX	132435609	132435663	55	4	0.445253	0.889169	-0.443916	-13.9176	.	-1	-1
chr5	27829849	27830037	189	4	0.789088	0.316559	0.47253	13.9053	.	-1	-1
chr13	69192458	69192688	231	4	0.443026	0.886227	-0.443201	-13.8996	.	-1	-1
chr7	69863397	69863450	54	4	0.803989	0.204126	0.599863	13.8978	.	-1	-1
chr10	62055142	62055351	210	4	0.730659	0.242251	0.488408	13.8782	chr10	62055020	62055263
chr4	147799921	147800088	168	4	0.815896	0.338296	0.4776	13.8749	.	-1	-1
chr6	14372864	14372919	56	4	0.942514	0.507311	0.435203	13.8488	.	-1	-1
chr12	101330390	101330472	83	4	0.863867	0.34868	0.515187	13.847	.	-1	-1
chr15	29038387	29038438	52	4	0.947281	0.550284	0.396996	13.8263	.	-1	-1
chr9	106312333	106312522	190	4	0.46224	0.895497	-0.433257	-13.8081	.	-1	-1
chr4	121591497	121591698	202	4	0.528233	0.953632	-0.425399	-13.7868	.	-1	-1
chr2	184300723	184300827	105	4	0.163168	0.688405	-0.525237	-13.7855	.	-1	-1
chr4	176698651	176698734	84	4	0.360014	0.84639	-0.486376	-13.7796	.	-1	-1
chr1	105476805	105477338	534	4	0.193768	0.699368	-0.5056	-13.7703	.	-1	-1
chr6	45679762	45679812	51	4	0.937703	0.420218	0.517485	13.7699	.	-1	-1
chr4	185879265	185879432	168	4	0.732972	0.295163	0.437809	13.7641	.	-1	-1
chr2	150156191	150156355	165	4	0.348516	0.825162	-0.476645	-13.7464	.	-1	-1
chr16	74048176	74048424	249	4	0.941137	0.516409	0.424729	13.6991	.	-1	-1
chr8	38766494	38766605	112	4	0.571123	0.96713	-0.396008	-13.6854	.	-1	-1
chr20	16786210	16786325	116	4	0.36059	0.842171	-0.481581	-13.6747	.	-1	-1
chr2	149459142	149459202	61	4	0.0880902	0.567014	-0.478923	-13.6665	.	-1	-1
chr18	5265456	5265655	200	4	0.328091	0.790656	-0.462565	-13.6648	.	-1	-1
chr7	58934492	58934647	156	4	0.73696	0.16911	0.56785	13.6631	.	-1	-1
chr2	161769475	161769730	256	4	0.409662	0.856573	-0.44691	-13.6628	.	-1	-1
chrUn_GL000213v1	38779	38869	91	4	0.906497	0.344566	0.561931	13.6215	.	-1	-1
chr8	42012645	42012701	57	4	0.59329	0.964824	-0.371534	-13.6148	.	-1	-1
chr2	66170841	66171113	273	4	0.661388	0.177051	0.484337	13.612	chr2	66170737	66171147
chr16	36470093	36470150	58	4	0.308207	0.873841	-0.565634	-13.5968	.	-1	-1
chr14	77042189	77042292	104	4	0.844892	0.439825	0.405067	13.5801	.	-1	-1
chr4	181698707	181698763	57	4	0.958807	0.475007	0.4838	13.5684	.	-1	-1
chr8	88768035	88768253	219	4	0.0839479	0.535341	-0.451393	-13.565	.	-1	-1
chr1	192136893	192137003	111	4	0.768484	0.283006	0.485478	13.5535	.	-1	-1
chrX	155058781	155058846	66	4	0.734286	0.245414	0.488871	13.5512	.	-1	-1
chr4	123694296	123694360	65	4	0.598531	0.96457	-0.366039	-13.5201	.	-1	-1
chr2	186026472	186026634	163	4	0.857776	0.406623	0.451153	13.5201	.	-1	-1
chr18	47832309	47832467	159	4	0.857827	0.356672	0.501155	13.4981	.	-1	-1
chr3	162706255	162706379	125	4	0.15514	0.669119	-0.51398	-13.4864	.	-1	-1
chrX	22799007	22799064	58	4	0.291885	0.789945	-0.498061	-13.4738	.	-1	-1
chrX	131406687	131406771	85	4	0.425034	0.882674	-0.45764	-13.4646	.	-1	-1
chr14	46315203	46315428	226	4	0.192336	0.668398	-0.476062	-13.4368	.	-1	-1
chr10	54607963	54608131	169	4	0.612358	0.171211	0.441147	13.4338	.	-1	-1
chr13	21118001	21118069	69	4	0.787632	0.354941	0.43269	13.4325	.	-1	-1
chr1	194920974	194921050	77	4	0.798065	0.264328	0.533737	13.429	.	-1	-1
chr19	34995290	34995341	52	4	0.836786	0.374702	0.462084	13.4273	.	-1	-1
chr1	198600032	198600085	54	4	0.533768	0.953632	-0.419863	-13.4079	.	-1	-1
chr16	69957925	69958020	96	4	0.933904	0.352431	0.581473	13.393	.	-1	-1
chrX	60463876	60463938	63	4	0.127248	0.725113	-0.597865	-13.3864	.	-1	-1
chr3	183652658	183652777	120	4	0.976386	0.547354	0.429032	13.3739	.	-1	-1
chr4	77283280	77283422	143	4	0.344367	0.803365	-0.458998	-13.3571	.	-1	-1
chr4	100718215	100718314	100	4	0.716803	0.235738	0.481065	13.3346	.	-1	-1
chr11	61972841	61972999	159	4	0.826083	0.417431	0.408652	13.3276	.	-1	-1
chr2	16110646	16110701	56	4	0.355033	0.845777	-0.490744	-13.3228	.	-1	-1
chr9	43031213	43031295	83	4	0.962678	0.480709	0.481969	13.3133	.	-1	-1
chr5	78607745	78607805	61	4	0.555996	0.141878	0.414118	13.3124	.	-1	-1
chr17	17434548	17434707	160	4	0.899544	0.451169	0.448375	13.292	.	-1	-1
chr1	95982275	95982388	114	4	0.0563534	0.468484	-0.412131	-13.2686	.	-1	-1
chr4	71991527	71991662	136	4	0.421184	0.875174	-0.45399	-13.2635	.	-1	-1
chr4	165296117	165296267	151	4	0.953093	0.611886	0.341206	13.2426	.	-1	-1
chr3	93597088	93597197	110	4	0.185486	0.749745	-0.564259	-13.2263	.	-1	-1
chr20	40311008	40311059	52	4	0.911886	0.41867	0.493216	13.2152	.	-1	-1
chr2	185934309	185934435	127	4	0.14169	0.632505	-0.490815	-13.2115	.	-1	-1
chr12	91626847	91626954	108	4	0.478271	0.903786	-0.425514	-13.2091	.	-1	-1
chr20	7213009	7213289	281	4	0.266446	0.754818	-0.488372	-13.2051	.	-1	-1
chr11	90966429	90966541	113	4	0.30482	0.80296	-0.49814	-13.1768	.	-1	-1
chr13	35927496	35927551	56	4	0.549175	0.104134	0.445041	13.1679	.	-1	-1
chr8	144913675	144913812	138	4	0.734283	0.287659	0.446624	13.1645	.	-1	-1
chr7	91373222	91373408	187	4	0.712578	0.204751	0.507828	13.1533	.	-1	-1
chr17	22961856	22961913	58	4	0.389522	0.911455	-0.521932	-13.1396	.	-1	-1
chr2	92380140	92380224	85	4	0.776272	0.204126	0.572145	13.1359	.	-1	-1
chr9	85428509	85428561	53	4	0.733601	0.283085	0.450516	13.1194	.	-1	-1
chr3	106100723	106100892	170	4	0.681136	0.249209	0.431927	13.0511	.	-1	-1
chr14	47036914	47037013	100	4	0.260787	0.723965	-0.463177	-13.039	.	-1	-1
chrX	8085022	8085073	52	4	0.791288	0.291524	0.499764	13.0383	.	-1	-1
chr20	49385340	49385464	125	4	0.841228	0.39923	0.441998	13.0291	.	-1	-1
chr4	5492010	5492060	51	4	0.167184	0.620613	-0.453428	-12.994	.	-1	-1
chr2	91542845	91543991	1147	4	0.877513	0.382626	0.494887	12.9791	.	-1	-1
chr18	16229962	16231178	1217	8	0.702473	0.399194	0.30328	12.9726	.	-1	-1
chr2	233487191	233487322	132	4	0.755776	0.331684	0.424092	12.9545	.	-1	-1
chr7	91552031	91552086	56	4	0.492663	0.938633	-0.44597	-12.9538	.	-1	-1
chr7	18693992	18694125	134	4	0.581105	0.962664	-0.38156	-12.9447	.	-1	-1
chr5	174829803	174829878	76	4	0.507845	0.111394	0.39645	12.9413	chr5	174829297	174829905
chr6	132569895	132569973	79	4	0.87579	0.419653	0.456137	12.9295	.	-1	-1
chr20	53657712	53657765	54	4	0.291535	0.735601	-0.444066	-12.9183	.	-1	-1
chr4	10866842	10866950	109	4	0.776115	0.339435	0.43668	12.8992	.	-1	-1
chr18	38449873	38449926	54	4	0.175314	0.699356	-0.524042	-12.8942	.	-1	-1
chr9	28165804	28165952	149	4	0.176972	0.640188	-0.463216	-12.8755	.	-1	-1
chr2	164740120	164740236	117	4	0.704653	0.282051	0.422602	12.8685	.	-1	-1
chr2	65660443	65660557	115	4	0.688912	0.268406	0.420506	12.8634	.	-1	-1
chr8	45220416	45220514	99	4	0.838806	0.346288	0.492518	12.8073	.	-1	-1
chr13	106807957	106808041	85	4	0.452396	0.909284	-0.456887	-12.8035	.	-1	-1
chr14	48023064	48023168	105	4	0.261059	0.737847	-0.476788	-12.7796	.	-1	-1
chr19	23360369	23360554	186	4	0.147391	0.603732	-0.456341	-12.7747	.	-1	-1
chr3	45204232	45204301	70	4	0.728066	0.289213	0.438853	12.7667	chr3	45204248	45204436
chr7	94629685	94629812	128	4	0.856457	0.437202	0.419255	12.7398	.	-1	-1
chr5	715930	716056	127	4	0.789718	0.316645	0.473072	12.7364	.	-1	-1
chr18	19036968	19037057	90	4	0.959483	0.470016	0.489467	12.727	.	-1	-1
chr9	22506910	22507003	94	4	0.140384	0.572075	-0.431691	-12.6662	.	-1	-1
chr15	26730792	26731011	220	4	0.718464	0.277495	0.44097	12.6493	.	-1	-1
chr4	74248730	74248787	58	4	0.662998	0.185583	0.477415	12.6403	.	-1	-1
chr18	20805340	20805391	52	4	0.807425	0.358848	0.448577	12.6383	.	-1	-1
chr5	46727593	46727663	71	4	0.0887719	0.66216	-0.573388	-12.6202	.	-1	-1
chr8	53599628	53599862	235	4	0.51538	0.945531	-0.430151	-12.5999	.	-1	-1
chr11	53597846	53597943	98	4	0.971168	0.433143	0.538025	12.5493	.	-1	-1
chr7	105584360	105584411	52	4	0.677139	0.241551	0.435588	12.5481	.	-1	-1
chr14	27336640	27337047	408	5	0.133508	0.457642	-0.324134	-12.4789	.	-1	-1
chr8	45738132	45738230	99	4	0.149545	0.725113	-0.575568	-12.4462	.	-1	-1
chr17	26161570	26161640	71	4	0.149545	0.725113	-0.575568	-12.4462	.	-1	-1
chr9	7814564	7814635	72	4	0.626642	0.169803	0.45684	12.4214	.	-1	-1
chr18	39505877	39505927	51	4	0.121223	0.660821	-0.539599	-12.3819	.	-1	-1
chr3	63104013	63104132	120	4	0.64681	0.175187	0.471623	12.3757	.	-1	-1
chr12	35503923	35503974	52	4	0.346201	0.891177	-0.544976	-12.3529	.	-1	-1
chr4	122941985	122942116	132	4	0.905616	0.489454	0.416163	12.3259	.	-1	-1
chr13	18245717	18245767	51	4	0.437268	0.911455	-0.474186	-12.3139	.	-1	-1
chr12	70662136	70662245	110	4	0.681567	0.227667	0.4539	12.2475	.	-1	-1
chr10	55589905	55589960	56	4	0.779594	0.31572	0.463874	12.232	.	-1	-1
chr3	178061999	178062137	139	4	0.7173	0.255002	0.462298	12.2102	.	-1	-1
chrX	60471885	60471965	81	4	0.392052	0.891177	-0.499125	-12.171	.	-1	-1
chr8	44500190	44500287	98	4	0.730848	0.166089	0.564758	12.1348	.	-1	-1
chr8	44872435	44872533	99	4	0.730848	0.166089	0.564758	12.1348	.	-1	-1
chr16	70191645	70191734	90	4	0.244169	0.858851	-0.614682	-12.1134	.	-1	-1
chr10	40509201	40509252	52	4	0.85218	0.342843	0.509337	12.0837	.	-1	-1
chr6	58565316	58565413	98	4	0.906497	0.352431	0.554067	12.0391	.	-1	-1
chr9	44671940	44671995	56	4	0.730848	0.166089	0.564758	11.9913	.	-1	-1
chr9	45312193	45312282	90	4	0.730848	0.166089	0.564758	11.9913	.	-1	-1
chr11	52236465	52236564	100	4	0.801628	0.236644	0.564984	11.9447	.	-1	-1
chr2	147215479	147215582	104	4	0.0906559	0.562447	-0.471791	-11.9445	.	-1	-1
chrX	93668471	93668608	138	4	0.0980936	0.478309	-0.380216	-11.9414	.	-1	-1
chr2	92886885	92886969	85	4	0.343313	0.891177	-0.547864	-11.898	.	-1	-1
chr3	1069049	1069239	191	4	0.137502	0.544247	-0.406746	-11.8864	.	-1	-1
chr11	52049071	52049168	98	4	0.343313	0.891177	-0.547864	-11.8827	.	-1	-1
chr11	51159403	51159499	97	4	0.908975	0.424222	0.484753	11.7261	.	-1	-1
chr7	60628202	60628292	91	4	0.343313	0.891177	-0.547864	-11.6144	.	-1	-1
chr13	82466954	82467957	1004	5	0.13956	0.468295	-0.328735	-11.3324	.	-1	-1
chr8	45257510	45257592	83	4	0.237114	0.719482	-0.482368	-11.325	.	-1	-1
chr2	132158927	132159650	724	5	0.714037	0.364648	0.349389	9.33686	.	-1	-1
chr9	5241317	5242480	1164	4	0.601022	0.296844	0.304177	8.25205	.	-1	-1
chr20	27654043	27656436	2394	7	0.662875	0.485532	0.177343	7.62589	.	-1	-1
chr9	40848890	40849472	583	7	0.382234	0.55029	-0.168056	-7.60123	.	-1	-1
chr7	58437693	58439736	2044	5	0.429875	0.697483	-0.267608	-5.46675	.	-1	-1
chr5	64379363	64379892	530	4	0.491816	0.542517	-0.0507015	-4.69009	.	-1	-1
chr14	55809012	55809378	367	4	0.519746	0.589562	-0.0698165	-4.48502	.	-1	-1
chr5	66551887	66552354	468	5	0.731923	0.804316	-0.0723923	-4.08997	.	-1	-1
chr3	29057293	29058066	774	4	0.7026	0.588359	0.114241	3.31911	.	-1	-1
chr7	59684851	59687291	2441	14	0.469983	0.422191	0.047792	3.2848	.	-1	-1
chr9	64971181	64971482	302	4	0.577068	0.59365	-0.0165821	-2.24343	.	-1	-1
chr4	11444488	11444915	428	4	0.609878	0.516443	0.093435	2.23132	.	-1	-1
chr2	229555536	229555893	358	4	0.458483	0.526773	-0.0682897	-2.0518	.	-1	-1
chr10	40713047	40714332	1286	5	0.690687	0.623619	0.0670674	1.63081	.	-1	-1
chr4	32398667	32398946	280	4	0.42231	0.452226	-0.0299167	-1.40172	.	-1	-1
chr3	12130237	12130869	633	4	0.5473	0.485767	0.0615335	1.19927	.	-1	-1
chr20	10191187	10191476	290	4	0.62375	0.616476	0.00727391	1.07994	.	-1	-1
chr12	80504573	80505103	531	4	0.535699	0.531877	0.00382191	0.947076	.	-1	-1
chr13	83857757	83858500	744	5	0.474579	0.484551	-0.00997163	-0.578889	.	-1	-1
chr16	79857261	79857698	438	4	0.244469	0.253429	-0.00895945	-0.256895	.	-1	-1
chr6	22716149	22716591	443	4	0.353206	0.406173	-0.0529662	0.154418	.	-1	-1

## Sheet: DMR.TNF12d.vs.0h.RELA_KO
chr	start	end	length	nCG	meanMethy1	meanMethy2	diff.Methy	areaStat	p65_peak_chr	p65_peak_start	p65_peak_end
chr11	94740239	94740908	670	158	0.169393	0.626724	-0.457331	-635.903	.	-1	-1
chr11	61827525	61828063	539	128	0.191808	0.598671	-0.406863	-455.022	.	-1	-1
chr9	138220637	138221321	685	86	0.381283	0.879543	-0.49826	-385.242	.	-1	-1
chr5	171309273	171309623	351	91	0.600966	0.180351	0.420615	338.315	.	-1	-1
chr21	8447496	8447766	271	93	0.401666	0.793707	-0.39204	-293.736	.	-1	-1
chr11	9574068	9574291	224	63	0.485215	0.0787985	0.406416	260.153	.	-1	-1
chr22_KI270733v1_random	132254	132527	274	48	0.769255	0.177137	0.592118	231.252	.	-1	-1
chr7	65239609	65239907	299	60	0.323148	0.737795	-0.414647	-213.268	.	-1	-1
chr11	67731974	67732284	311	63	0.667834	0.261456	0.406378	209.794	.	-1	-1
chr2	202912477	202912827	351	48	0.581281	0.131254	0.450026	187.53	.	-1	-1
chr8	61138966	61139198	233	38	0.670653	0.181072	0.489581	163.121	.	-1	-1
chr2	43224498	43224652	155	47	0.189111	0.582536	-0.393425	-159.283	.	-1	-1
chr9	136902498	136902844	347	30	0.792528	0.202347	0.590181	158.458	chr9	136902460	136902730
chr2	127416030	127416268	239	47	0.566158	0.172075	0.394083	158.238	.	-1	-1
chr21	8441039	8441330	292	45	0.505964	0.104192	0.401772	156.38	.	-1	-1
chrX	30850427	30850669	243	28	0.288987	0.902085	-0.613098	-147.179	.	-1	-1
chr1	170671339	170671614	276	36	0.68729	0.18753	0.499759	139.403	.	-1	-1
chr15	28508294	28508616	323	39	0.732198	0.278727	0.453471	137.161	.	-1	-1
chr7	105405437	105405666	230	40	0.41812	0.858468	-0.440349	-135.027	.	-1	-1
chr21	8211458	8211671	214	42	0.417986	0.824115	-0.406129	-134.495	.	-1	-1
chr15	58065225	58065523	299	35	0.467474	0.0771552	0.390318	128.843	.	-1	-1
chr1	145505926	145506271	346	32	0.646682	0.159376	0.487305	128.546	.	-1	-1
chrX	19121820	19121969	150	39	0.654943	0.259948	0.394995	126.493	.	-1	-1
chr15	22714898	22715181	284	32	0.581658	0.143019	0.438638	122.056	.	-1	-1
chr16	71723679	71723809	131	32	0.451252	0.0919485	0.359304	118.134	.	-1	-1
chr5	106388635	106388893	259	32	0.412864	0.881048	-0.468183	-108.305	.	-1	-1
chr1_KI270712v1_random	105117	105338	222	28	0.457703	0.852369	-0.394667	-101.268	.	-1	-1
chr1	9962742	9962971	230	32	0.322458	0.745485	-0.423027	-101.045	.	-1	-1
chr2	143657068	143657304	237	29	0.31301	0.777798	-0.464788	-95.7626	.	-1	-1
chrX	57121532	57121752	221	29	0.299918	0.693058	-0.39314	-92.9574	.	-1	-1
chr14	77616548	77616679	132	25	0.451987	0.0872222	0.364765	90.3151	.	-1	-1
chrX	77915845	77916228	384	26	0.285783	0.73267	-0.446886	-89.5769	.	-1	-1
chr7	50450408	50450466	59	26	0.499115	0.153649	0.345466	88.0624	.	-1	-1
chr9	61571181	61571442	262	22	0.740727	0.182685	0.558043	85.1885	.	-1	-1
chr19	21770113	21770429	317	22	0.671195	0.172152	0.499043	83.6905	.	-1	-1
chrX	37685769	37685852	84	24	0.154302	0.535532	-0.381231	-80.2412	.	-1	-1
chr14	46224108	46224322	215	25	0.175233	0.589964	-0.414731	-77.812	.	-1	-1
chr8	2835884	2836277	394	18	0.208801	0.755458	-0.546657	-76.9265	.	-1	-1
chr8	6329988	6330132	145	24	0.435166	0.869674	-0.434508	-76.5427	.	-1	-1
chr4	90680465	90680805	341	19	0.250868	0.810685	-0.559817	-75.8737	.	-1	-1
chrX	21839988	21840136	149	21	0.294641	0.771144	-0.476504	-73.5781	.	-1	-1
chrX	141235166	141235455	290	22	0.316981	0.772572	-0.455592	-72.2491	.	-1	-1
chrX	136817932	136818192	261	22	0.413367	0.815294	-0.401927	-72.0874	.	-1	-1
chr12	26272037	26272279	243	22	0.802246	0.358363	0.443883	71.4834	.	-1	-1
chr4	108073739	108074027	289	21	0.46659	0.894568	-0.427978	-69.4517	.	-1	-1
chrY	2891784	2891949	166	20	0.326347	0.858301	-0.531954	-69.276	.	-1	-1
chr14_KI270726v1_random	14494	14615	122	21	0.336548	0.768904	-0.432355	-67.8263	.	-1	-1
chrX	154096718	154096855	138	20	0.505281	0.103561	0.40172	67.3372	.	-1	-1
chrX	50598720	50599160	441	14	0.792981	0.202154	0.590827	67.2451	.	-1	-1
chr19	49072739	49072804	66	21	0.209913	0.587409	-0.377495	-67.1567	.	-1	-1
chr11	75749560	75749686	127	16	0.269627	0.863396	-0.593769	-66.0816	.	-1	-1
chr5	140926948	140927033	86	20	0.548291	0.162922	0.385369	66.0522	.	-1	-1
chr8	2853062	2853216	155	21	0.387577	0.804753	-0.417176	-65.937	.	-1	-1
chr10	114026672	114027072	401	14	0.785387	0.212796	0.572592	65.6705	.	-1	-1
chr9	63649827	63650053	227	17	0.115843	0.636139	-0.520296	-65.5436	.	-1	-1
chrX	50025199	50025368	170	20	0.204638	0.605627	-0.400989	-65.1768	.	-1	-1
chr16	153931	154052	122	20	0.149844	0.562961	-0.413117	-64.5202	.	-1	-1
chr15	26739082	26739434	353	17	0.677645	0.157473	0.520172	64.0438	.	-1	-1
chr1	246623632	246623960	329	18	0.38674	0.870238	-0.483498	-62.7473	.	-1	-1
chr13	59802706	59802806	101	20	0.470792	0.864477	-0.393684	-62.4281	.	-1	-1
chr6	24608640	24608747	108	20	0.388776	0.817931	-0.429155	-61.4098	.	-1	-1
chrX	12697160	12697415	256	12	0.301322	0.917157	-0.615835	-61.343	.	-1	-1
chrX	131778757	131779002	246	18	0.803055	0.394026	0.409028	59.2677	.	-1	-1
chr18	60730541	60730709	169	14	0.704962	0.155757	0.549205	58.695	.	-1	-1
chr12	47427926	47428307	382	17	0.40874	0.871274	-0.462534	-58.5611	.	-1	-1
chr14	34545015	34545145	131	11	0.890678	0.171993	0.718685	57.9216	.	-1	-1
chr13	90369327	90369548	222	14	0.608591	0.0682379	0.540353	57.7723	.	-1	-1
chr18	20365197	20367427	2231	13	0.173972	0.834591	-0.660619	-57.7657	.	-1	-1
chr9	28944460	28944705	246	17	0.360876	0.795999	-0.435123	-54.3929	.	-1	-1
chr4	32693449	32693519	71	11	0.733296	0.0838203	0.649476	54.3828	.	-1	-1
chrX	73829512	73829651	140	16	0.793641	0.346612	0.447029	54.1831	.	-1	-1
chr15	40955683	40955855	173	17	0.497974	0.897555	-0.399581	-54.0235	.	-1	-1
chr9	44799019	44799249	231	10	0.137532	0.828899	-0.691367	-53.748	.	-1	-1
chr13	82937998	82938165	168	16	0.2396	0.688613	-0.449013	-53.5286	.	-1	-1
chrX	136754351	136754793	443	11	0.839051	0.232479	0.606573	53.2525	.	-1	-1
chr18	17130996	17132406	1411	13	0.222543	0.876437	-0.653894	-52.6743	.	-1	-1
chr16	22520714	22520851	138	17	0.773972	0.263629	0.510342	52.5471	.	-1	-1
chr20	54956626	54956843	218	15	0.633527	0.161565	0.471962	52.258	.	-1	-1
chr16	1236748	1236934	187	15	0.766909	0.236157	0.530752	52.0975	.	-1	-1
chr15	28432108	28432306	199	15	0.384032	0.894562	-0.51053	-51.5774	.	-1	-1
chr4	152902329	152902518	190	12	0.930731	0.357783	0.572947	51.347	.	-1	-1
chr9	22524020	22524260	241	13	0.38128	0.910944	-0.529664	-51.3258	.	-1	-1
chrX	21624532	21624679	148	14	0.697015	0.18133	0.515685	50.8914	.	-1	-1
chr5	71607184	71607492	309	12	0.417828	0.920947	-0.50312	-50.0271	.	-1	-1
chr1	228632422	228632589	168	15	0.174718	0.621269	-0.446551	-49.8909	.	-1	-1
chr3	155151029	155151201	173	10	0.251955	0.91391	-0.661955	-49.7309	.	-1	-1
chr8	2918932	2919282	351	14	0.668437	0.173469	0.494968	49.5851	.	-1	-1
chr9	78961232	78961469	238	14	0.827027	0.300504	0.526523	49.5075	.	-1	-1
chrX	24465021	24465123	103	15	0.215194	0.605326	-0.390133	-48.8539	.	-1	-1
chrX	132490021	132490086	66	15	0.649407	0.245902	0.403505	48.7645	.	-1	-1
chrX	106551873	106552117	245	13	0.369658	0.810669	-0.441012	-48.1031	.	-1	-1
chrY	5107777	5107931	155	12	0.822179	0.210946	0.611232	47.7769	.	-1	-1
chr10	91428197	91428358	162	11	0.255245	0.833503	-0.578258	-47.5625	.	-1	-1
chr22	18502405	18502521	117	15	0.441834	0.87005	-0.428216	-46.8654	.	-1	-1
chrX	65722394	65722639	246	14	0.775069	0.326134	0.448934	46.5431	.	-1	-1
chr7	69651405	69651528	124	8	0.860098	0.167996	0.692103	46.1875	.	-1	-1
chr15	26575962	26576249	288	11	0.322179	0.859755	-0.537577	-45.6841	.	-1	-1
chr9	41853197	41853370	174	12	0.304312	0.898234	-0.593923	-45.2418	.	-1	-1
chr15	70140791	70141002	212	12	0.839014	0.338415	0.500599	45.1601	chr15	70140592	70141033
chr9	61467553	61467691	139	14	0.38315	0.900091	-0.516941	-44.9681	.	-1	-1
chrX	77876736	77876961	226	13	0.333622	0.798919	-0.465297	-44.5947	.	-1	-1
chr14	46114812	46114879	68	8	0.0977887	0.858301	-0.760513	-44.4739	.	-1	-1
chr3	185862418	185862609	192	13	0.556779	0.94393	-0.387151	-44.1651	.	-1	-1
chr1	198778260	198778527	268	12	0.748808	0.243944	0.504864	44.1648	chr1	198778243	198778498
chr17	6345721	6345861	141	12	0.283545	0.771856	-0.488311	-43.6609	.	-1	-1
chr20	45359796	45360057	262	13	0.853547	0.408251	0.445296	43.5638	chr20	45359782	45360019
chrX	59760999	59761113	115	10	0.169491	0.839504	-0.670013	-43.2958	.	-1	-1
chr20	42990071	42990297	227	10	0.144391	0.76078	-0.616389	-43.0191	.	-1	-1
chr16	37268090	37268285	196	13	0.291141	0.778784	-0.487644	-42.7554	.	-1	-1
chrX	80726128	80726297	170	12	0.841525	0.338376	0.503149	42.6622	.	-1	-1
chr8	2872055	2872291	237	12	0.341103	0.789157	-0.448054	-42.6332	.	-1	-1
chrX	49848243	49848480	238	10	0.716262	0.139464	0.576797	42.0825	.	-1	-1
chr21	13763906	13764027	122	14	0.83876	0.382914	0.455846	41.9361	.	-1	-1
chr21	8392730	8394544	1815	13	0.274036	0.709585	-0.435548	-41.5078	.	-1	-1
chr17	77882744	77882981	238	13	0.662901	0.241082	0.421819	41.1919	.	-1	-1
chr12	35588310	35588565	256	13	0.854196	0.359584	0.494612	41.0078	.	-1	-1
chr8	124119099	124119243	145	10	0.934417	0.442812	0.491605	40.9798	.	-1	-1
chr11	14026489	14026731	243	12	0.813903	0.329935	0.483969	40.9681	.	-1	-1
chr10	31760899	31761080	182	9	0.231925	0.812268	-0.580343	-40.9317	.	-1	-1
chr9	89554834	89555016	183	13	0.427782	0.87129	-0.443508	-40.7484	.	-1	-1
chrX	84140131	84140310	180	10	0.847669	0.315158	0.532511	40.4014	.	-1	-1
chr14	25685659	25685900	242	12	0.334502	0.790115	-0.455612	-39.8415	.	-1	-1
chr15	33961706	33961770	65	13	0.46244	0.862586	-0.400146	-39.7795	.	-1	-1
chrX	8103732	8103908	177	12	0.374927	0.831332	-0.456405	-39.639	.	-1	-1
chr6	50006226	50006323	98	12	0.302939	0.803559	-0.50062	-39.6048	.	-1	-1
chr10	88993191	88993787	597	8	0.804443	0.200954	0.603489	39.0845	.	-1	-1
chr20	12772257	12772414	158	12	0.296949	0.836093	-0.539144	-39.0735	.	-1	-1
chr1	23646215	23646407	193	8	0.912015	0.340901	0.571113	38.8592	.	-1	-1
chr9	19911163	19911380	218	11	0.831423	0.3303	0.501122	38.8202	.	-1	-1
chr18	15896690	15900665	3976	9	0.186014	0.875745	-0.689731	-38.5147	.	-1	-1
chr10	8619809	8619966	158	11	0.865895	0.345039	0.520855	38.3007	.	-1	-1
chr4	50821143	50821484	342	11	0.394509	0.85857	-0.464062	-38.0435	.	-1	-1
chr12	42417970	42418125	156	12	0.426116	0.831831	-0.405715	-37.8865	.	-1	-1
chr18	18735799	18735990	192	10	0.311929	0.89338	-0.581451	-37.4252	.	-1	-1
chr16	1231674	1231861	188	11	0.344307	0.795144	-0.450836	-37.0604	.	-1	-1
chr21	9322950	9323131	182	8	0.771247	0.0999394	0.671308	37.0183	.	-1	-1
chrX	107122180	107122422	243	10	0.276449	0.821577	-0.545128	-37.0122	.	-1	-1
chr16	11021396	11021683	288	10	0.464139	0.9239	-0.459761	-36.973	.	-1	-1
chrX	149807047	149807226	180	8	0.236829	0.842517	-0.605689	-36.8644	.	-1	-1
chr18	16257102	16257192	91	10	0.861734	0.272711	0.589023	36.8247	.	-1	-1
chr11	75602582	75602656	75	12	0.520145	0.911814	-0.391669	-36.646	.	-1	-1
chr22	15695791	15696031	241	8	0.916525	0.321606	0.594919	36.6362	.	-1	-1
chr9	65284240	65284355	116	11	0.832485	0.378867	0.453618	36.5552	.	-1	-1
chrX	140026355	140026519	165	9	0.37234	0.918414	-0.546074	-36.4344	.	-1	-1
chr9	43598377	43598611	235	10	0.241985	0.757452	-0.515467	-36.1384	.	-1	-1
chr14_KI270725v1_random	91435	91550	116	11	0.303275	0.850334	-0.547058	-36.0883	.	-1	-1
chrX	50025433	50025484	52	11	0.165812	0.582739	-0.416927	-35.984	.	-1	-1
chr1	179233615	179233771	157	11	0.730094	0.271064	0.459031	35.9275	.	-1	-1
chr9	68558808	68558981	174	10	0.419494	0.941361	-0.521867	-35.5422	.	-1	-1
chr1	172025009	172025237	229	10	0.862796	0.391566	0.47123	35.5021	.	-1	-1
chr20	50211396	50211498	103	10	0.319116	0.871873	-0.552757	-35.2537	.	-1	-1
chr14	28252693	28252746	54	6	0.0959641	0.801692	-0.705728	-35.109	.	-1	-1
chr20	7083887	7084152	266	7	0.833366	0.18353	0.649836	35.0362	.	-1	-1
chr12	82866474	82866800	327	10	0.771467	0.270813	0.500655	34.9906	.	-1	-1
chr1	175996935	175997096	162	6	0.11051	0.838029	-0.727519	-34.8827	.	-1	-1
chr16	18426035	18426173	139	9	0.273618	0.881443	-0.607825	-34.7054	.	-1	-1
chr19	7052211	7052349	139	9	0.450522	0.927602	-0.477079	-34.6948	.	-1	-1
chrX	136638937	136639076	140	11	0.344514	0.761356	-0.416842	-34.5839	.	-1	-1
chr10	41250091	41250332	242	10	0.873567	0.339896	0.53367	34.575	.	-1	-1
chr13	27690348	27690425	78	10	0.428404	0.859171	-0.430767	-34.5725	.	-1	-1
chrX	112829348	112829456	109	9	0.78562	0.258716	0.526904	34.5561	.	-1	-1
chrX	42020755	42020870	116	10	0.331123	0.808507	-0.477383	-34.4156	.	-1	-1
chr4	146033262	146033413	152	10	0.826207	0.340745	0.485461	34.3998	.	-1	-1
chr20	42096459	42096578	120	10	0.868455	0.365344	0.503112	34.3943	.	-1	-1
chr2	37249450	37249537	88	11	0.453048	0.946758	-0.49371	-34.3224	.	-1	-1
chrX	48038259	48038339	81	6	0.948726	0.250316	0.698411	34.2413	.	-1	-1
chr6	153563140	153563191	52	10	0.810755	0.334065	0.47669	34.2318	.	-1	-1
chr13	89306609	89306697	89	10	0.848212	0.35127	0.496943	34.2235	.	-1	-1
chr4	102209886	102210110	225	9	0.238224	0.826562	-0.588338	-34.0745	.	-1	-1
chr2	14521584	14521687	104	10	0.76442	0.212165	0.552255	34.0246	.	-1	-1
chr19	29111677	29111881	205	10	0.732622	0.241054	0.491569	34.0184	.	-1	-1
chr7	76951132	76951229	98	10	0.22153	0.781694	-0.560164	-33.8721	.	-1	-1
chr15	26440932	26441080	149	11	0.345048	0.80247	-0.457422	-33.8352	.	-1	-1
chr1	222355448	222355665	218	8	0.147543	0.74399	-0.596447	-33.83	.	-1	-1
chr2	149135447	149135596	150	10	0.346525	0.888757	-0.542232	-33.7899	.	-1	-1
chr7	66292506	66292566	61	11	0.772545	0.355069	0.417475	33.7637	.	-1	-1
chr18	16209566	16209680	115	10	0.878478	0.308887	0.569592	33.7516	.	-1	-1
chr15	37015097	37015185	89	10	0.791457	0.345062	0.446395	33.6056	.	-1	-1
chrX	96368661	96368802	142	8	0.200701	0.77292	-0.57222	-33.5074	.	-1	-1
chr4	130553031	130553108	78	8	0.741719	0.113008	0.62871	33.3696	.	-1	-1
chr6	142067978	142068216	239	10	0.195351	0.694969	-0.499618	-33.1631	.	-1	-1
chr12	41709790	41709998	209	8	0.802462	0.259966	0.542496	33.0899	chr12	41709609	41710209
chr3	155545135	155545308	174	8	0.166869	0.724414	-0.557546	-32.866	.	-1	-1
chrX	105720266	105720611	346	7	0.718064	0.165939	0.552125	32.805	.	-1	-1
chr1	96267406	96267457	52	8	0.641248	0.0896519	0.551596	32.7902	.	-1	-1
chr18	20583074	20583134	61	10	0.372495	0.853509	-0.481013	-32.6991	.	-1	-1
chr3	75567501	75567749	249	8	0.354463	0.920845	-0.566383	-32.6666	.	-1	-1
chr16	37065336	37065408	73	10	0.326162	0.858301	-0.532139	-32.632	.	-1	-1
chr18	38330866	38331172	307	9	0.744144	0.26533	0.478814	32.3048	.	-1	-1
chrX	63732875	63732936	62	8	0.443713	0.962873	-0.51916	-32.2878	.	-1	-1
chr12	2358039	2358245	207	9	0.80195	0.3031	0.49885	31.9568	chr12	2358052	2358212
chr9	129761589	129761685	97	10	0.794108	0.346587	0.44752	31.9304	.	-1	-1
chr16	37034269	37034425	157	8	0.824809	0.195208	0.629601	31.9036	.	-1	-1
chr9	9066745	9066809	65	10	0.716163	0.225849	0.490313	31.87	.	-1	-1
chr4	188597511	188597594	84	10	0.717176	0.239741	0.477435	31.8269	.	-1	-1
chr22	15558569	15558911	343	10	0.74994	0.207434	0.542506	31.7885	.	-1	-1
chr2	138779788	138779958	171	9	0.211392	0.642527	-0.431135	-31.77	.	-1	-1
chr3	160477795	160477905	111	10	0.237518	0.737483	-0.499965	-31.6742	.	-1	-1
chrX	64177855	64178325	471	7	0.307972	0.8898	-0.581829	-31.5219	.	-1	-1
chr8	63200136	63200379	244	8	0.801159	0.255019	0.54614	31.5101	.	-1	-1
chr18	16796737	16796886	150	6	0.228724	0.929989	-0.701265	-31.4709	.	-1	-1
chr11	38996253	38996351	99	10	0.104092	0.51849	-0.414398	-31.3077	.	-1	-1
chr20	29637625	29637806	182	8	0.267635	0.80274	-0.535105	-31.1481	.	-1	-1
chr1	247893275	247893401	127	9	0.79816	0.304719	0.493441	30.9968	.	-1	-1
chr16	38197113	38197241	129	8	0.770862	0.228731	0.542131	30.9264	.	-1	-1
chr7	127568114	127568382	269	7	0.257275	0.915426	-0.658151	-30.7981	.	-1	-1
chr18	66420202	66420291	90	6	0.0922863	0.775976	-0.68369	-30.7202	.	-1	-1
chr3	85528325	85528553	229	9	0.416172	0.891718	-0.475547	-30.7024	.	-1	-1
chrUn_KI270744v1	132797	133094	298	8	0.227585	0.801826	-0.57424	-30.6584	.	-1	-1
chr13	17623117	17623213	97	9	0.251855	0.84844	-0.596585	-30.6195	.	-1	-1
chr15	26607064	26607256	193	10	0.286803	0.757436	-0.470632	-30.5769	.	-1	-1
chr2	188789293	188789392	100	9	0.820776	0.258926	0.561849	30.5294	.	-1	-1
chr2	13901165	13901383	219	9	0.629887	0.165853	0.464033	30.3828	.	-1	-1
chr11	54991028	54991111	84	8	0.387746	0.853873	-0.466127	-30.1702	.	-1	-1
chr7	63540235	63540287	53	9	0.66146	0.19789	0.46357	30.1519	.	-1	-1
chr6	23386863	23386933	71	8	0.164245	0.725681	-0.561437	-30.1151	.	-1	-1
chr3	28065745	28065861	117	8	0.303967	0.825981	-0.522014	-30.0755	.	-1	-1
chrX	96814854	96814980	127	9	0.413946	0.866027	-0.452081	-30.0214	.	-1	-1
chr8	40863109	40863198	90	8	0.35511	0.905534	-0.550424	-29.9505	.	-1	-1
chr12	36275952	36276066	115	8	0.37445	0.939133	-0.564683	-29.9053	.	-1	-1
chr3	18939528	18939773	246	9	0.71426	0.235265	0.478995	29.8876	.	-1	-1
chrX	100914667	100914775	109	8	0.465775	0.933231	-0.467456	-29.8251	.	-1	-1
chr4	23229841	23230444	604	8	0.845105	0.301513	0.543591	29.7237	.	-1	-1
chr10	55191644	55191973	330	8	0.831144	0.322451	0.508693	29.6525	.	-1	-1
chr2	47313181	47313288	108	9	0.697414	0.261459	0.435955	29.6514	.	-1	-1
chr15	55716112	55716164	53	9	0.504808	0.937052	-0.432244	-29.5422	.	-1	-1
chr2	56874888	56874976	89	8	0.25867	0.810603	-0.551933	-29.5405	.	-1	-1
chrX	21639324	21639436	113	9	0.746041	0.262553	0.483488	29.5375	.	-1	-1
chr16	11637517	11637632	116	9	0.319567	0.758781	-0.439214	-29.5009	.	-1	-1
chr13	82608870	82608921	52	8	0.702845	0.135823	0.567021	29.4703	.	-1	-1
chr9	60597291	60597392	102	6	0.169491	0.898087	-0.728596	-29.2737	.	-1	-1
chr14	44744253	44744488	236	8	0.321743	0.834665	-0.512923	-29.2122	.	-1	-1
chr6	34386811	34387025	215	8	0.272298	0.795466	-0.523168	-29.1948	.	-1	-1
chr8	34981711	34981763	53	8	0.149732	0.707783	-0.558052	-29.1742	.	-1	-1
chr11	52538867	52538964	98	7	0.247558	0.907958	-0.6604	-29.1708	.	-1	-1
chr16	72630464	72630558	95	6	0.127174	0.858301	-0.731127	-29.0594	.	-1	-1
chr6	50025360	50025671	312	9	0.717939	0.259724	0.458216	29.0271	.	-1	-1
chr4	174286224	174286356	133	8	0.906975	0.419075	0.4879	28.9487	.	-1	-1
chr21	26942147	26942374	228	6	0.839676	0.257349	0.582327	28.9126	.	-1	-1
chr3	73062552	73062713	162	8	0.435537	0.961501	-0.525964	-28.8821	.	-1	-1
chr18	39655494	39655610	117	8	0.417131	0.90372	-0.486588	-28.8536	.	-1	-1
chr7	144282264	144282420	157	9	0.286683	0.840406	-0.553724	-28.696	.	-1	-1
chr2	29143191	29143241	51	8	0.844727	0.272711	0.572017	28.6497	.	-1	-1
chr13	92978540	92978707	168	8	0.577003	0.970652	-0.393649	-28.5986	.	-1	-1
chr11	96338880	96339061	182	7	0.773349	0.248814	0.524535	28.5973	.	-1	-1
chrX	92141514	92141689	176	8	0.616525	0.104085	0.512441	28.5858	.	-1	-1
chrX	50409574	50409706	133	6	0.124622	0.794421	-0.669798	-28.5736	.	-1	-1
chr9	66671726	66671801	76	9	0.442858	0.834184	-0.391326	-28.5567	.	-1	-1
chr16	36656931	36659051	2121	7	0.216605	0.899068	-0.682462	-28.5192	.	-1	-1
chr14	28227329	28227442	114	9	0.58466	0.131262	0.453398	28.4605	.	-1	-1
chr18	50762331	50762502	172	9	0.459424	0.898898	-0.439474	-28.4289	.	-1	-1
chr13	92163199	92163275	77	8	0.287953	0.860737	-0.572785	-28.37	.	-1	-1
chr4	32728493	32728654	162	8	0.112979	0.633264	-0.520285	-28.3505	.	-1	-1
chr8	81977348	81977557	210	8	0.161618	0.682929	-0.521311	-28.1694	.	-1	-1
chr19	21524256	21524315	60	9	0.763227	0.281747	0.48148	28.1549	.	-1	-1
chr17	12645188	12645395	208	8	0.259013	0.791622	-0.53261	-28.0855	.	-1	-1
chr6	94830041	94830221	181	9	0.940326	0.504148	0.436178	28.0378	.	-1	-1
chr15	27616175	27616261	87	9	0.399708	0.895831	-0.496123	-27.9918	.	-1	-1
chrX	8401565	8401789	225	8	0.731416	0.194544	0.536872	27.978	.	-1	-1
chr3	99623885	99623979	95	8	0.407196	0.939853	-0.532657	-27.6989	.	-1	-1
chrX	64200170	64200458	289	7	0.885515	0.364069	0.521446	27.6652	.	-1	-1
chrX	134291917	134292020	104	9	0.704428	0.261637	0.442791	27.6573	.	-1	-1
chr8	127366896	127366998	103	9	0.709395	0.256697	0.452698	27.6428	.	-1	-1
chr13	17435504	17435614	111	9	0.396359	0.855836	-0.459477	-27.6036	.	-1	-1
chr5	86565868	86566083	216	8	0.254675	0.776125	-0.521451	-27.5685	.	-1	-1
chr9	27955340	27955482	143	8	0.213679	0.719157	-0.505477	-27.4015	.	-1	-1
chr4	120702361	120702510	150	8	0.452687	0.944093	-0.491406	-27.3877	.	-1	-1
chr12	2338557	2338691	135	8	0.548418	0.959309	-0.41089	-27.3261	.	-1	-1
chr6	49229663	49229861	199	7	0.523817	0.0563374	0.467479	27.3255	.	-1	-1
chr16	82143824	82143939	116	8	0.397407	0.879697	-0.48229	-27.2668	.	-1	-1
chr18	68972195	68972389	195	7	0.818127	0.261348	0.556779	27.2396	.	-1	-1
chr15	56392331	56392386	56	8	0.268142	0.826022	-0.55788	-27.172	.	-1	-1
chr9	63830745	63830983	239	6	0.131272	0.789352	-0.65808	-27.1026	.	-1	-1
chr2	171340384	171340459	76	8	0.504054	0.96138	-0.457326	-27.0721	.	-1	-1
chr16	76191189	76191409	221	8	0.253096	0.7004	-0.447304	-27.0587	.	-1	-1
chr13	83647315	83647366	52	6	0.245102	0.898087	-0.652985	-26.9253	.	-1	-1
chr12	130066616	130066814	199	8	0.224842	0.687274	-0.462432	-26.8819	.	-1	-1
chr16	14824455	14824525	71	5	0.887104	0.123901	0.763202	26.7548	.	-1	-1
chr3	93139351	93139457	107	6	0.193182	0.898087	-0.704905	-26.7476	.	-1	-1
chr2	151360233	151360330	98	6	0.915146	0.23182	0.683326	26.7443	.	-1	-1
chr3	84821719	84821791	73	8	0.415349	0.927859	-0.51251	-26.7366	.	-1	-1
chr16	73821036	73821315	280	6	0.251238	0.89087	-0.639632	-26.7232	.	-1	-1
chr4	84129896	84130026	131	7	0.174774	0.771412	-0.596638	-26.702	.	-1	-1
chr2	167768721	167768837	117	7	0.945625	0.394579	0.551046	26.6905	.	-1	-1
chr7	78533567	78533933	367	5	0.149229	0.914194	-0.764965	-26.6653	.	-1	-1
chr2	155541348	155541445	98	5	0.118452	0.836284	-0.717831	-26.6234	.	-1	-1
chr2	93766553	93766802	250	8	0.156477	0.687138	-0.530661	-26.5146	.	-1	-1
chr16	36671644	36671715	72	8	0.234081	0.833999	-0.599918	-26.5055	.	-1	-1
chr14	28038441	28038560	120	7	0.157067	0.748065	-0.590998	-26.5051	.	-1	-1
chr1	146237044	146237135	92	8	0.25433	0.823221	-0.568891	-26.4046	.	-1	-1
chrX	103760582	103760632	51	6	0.892067	0.251638	0.640429	26.3222	.	-1	-1
chr10	65501450	65501547	98	6	0.910206	0.307369	0.602837	26.2916	chr10	65501260	65501468
chr5	123820003	123820317	315	7	0.923781	0.420768	0.503012	26.287	.	-1	-1
chr18	19595767	19595881	115	8	0.268142	0.858301	-0.590159	-26.2726	.	-1	-1
chr10	53326556	53326675	120	8	0.241889	0.747993	-0.506104	-26.2437	.	-1	-1
chrX	105391696	105391912	217	6	0.151997	0.748705	-0.596708	-26.2249	.	-1	-1
chr9	44322667	44322757	91	8	0.268142	0.858301	-0.590159	-26.2151	.	-1	-1
chrX	14879273	14879421	149	6	0.336236	0.891436	-0.5552	-26.2009	.	-1	-1
chr4	10959363	10959904	542	7	0.346977	0.883273	-0.536296	-26.1906	.	-1	-1
chr6	79483150	79483365	216	8	0.911744	0.457866	0.453878	26.1585	.	-1	-1
chr5	138082233	138082351	119	8	0.510885	0.936649	-0.425764	-26.0987	.	-1	-1
chr20	7680115	7680214	100	8	0.594182	0.121022	0.473161	26.0834	.	-1	-1
chr16	36963102	36963188	87	8	0.268142	0.858301	-0.590159	-26.0231	.	-1	-1
chr9	65675974	65676067	94	6	0.197861	0.808559	-0.610698	-25.942	.	-1	-1
chr5	35208964	35209182	219	4	0.963213	0.23534	0.727873	25.8287	.	-1	-1
chr2	87751188	87751296	109	5	0.214609	0.947249	-0.73264	-25.8116	.	-1	-1
chr5	62803733	62803801	69	8	0.767178	0.260499	0.506679	25.701	.	-1	-1
chr15	84173867	84174048	182	7	0.270277	0.767192	-0.496914	-25.6949	.	-1	-1
chrX	137701140	137701297	158	8	0.199143	0.702542	-0.503399	-25.682	.	-1	-1
chr7	60082736	60082827	92	8	0.824674	0.237885	0.58679	25.6702	.	-1	-1
chr9	22177787	22177876	90	8	0.855476	0.383104	0.472372	25.5499	.	-1	-1
chr21	28561277	28561424	148	6	0.85314	0.28644	0.5667	25.4077	.	-1	-1
chr18	40349372	40349621	250	7	0.703179	0.198477	0.504702	25.3693	.	-1	-1
chr18	39966166	39966293	128	6	0.888455	0.305255	0.583201	25.3588	.	-1	-1
chrX	105662637	105662698	62	8	0.281141	0.79777	-0.51663	-25.3339	.	-1	-1
chr3	92393540	92393591	52	8	0.905304	0.365587	0.539716	25.3226	.	-1	-1
chrX	111287406	111287913	508	8	0.626425	0.193228	0.433198	25.2962	.	-1	-1
chr9	106213049	106213375	327	5	0.720066	0.0832354	0.636831	25.1688	.	-1	-1
chr1	187886784	187886837	54	6	0.684983	0.103755	0.581227	25.1685	.	-1	-1
chr22	11270051	11270141	91	8	0.850186	0.272711	0.577476	25.1148	.	-1	-1
chr7	88079370	88079443	74	8	0.553107	0.957072	-0.403965	-25.073	.	-1	-1
chr9	28567691	28567767	77	4	0.102724	0.907372	-0.804648	-25.063	.	-1	-1
chrX	52358683	52358792	110	6	0.181972	0.815083	-0.633111	-25.0325	.	-1	-1
chr3	92256723	92256774	52	8	0.850186	0.272711	0.577476	25.0013	.	-1	-1
chr12	48810800	48810950	151	7	0.943994	0.484062	0.459931	24.988	.	-1	-1
chr4	131076867	131076974	108	8	0.262037	0.767479	-0.505442	-24.9839	.	-1	-1
chr6	38555269	38555502	234	6	0.893131	0.303448	0.589683	24.9513	.	-1	-1
chr3	63122778	63123058	281	6	0.744636	0.146159	0.598477	24.8899	.	-1	-1
chr15	23701774	23701862	89	8	0.704094	0.163706	0.540389	24.8828	.	-1	-1
chr9	42619243	42619313	71	7	0.379723	0.942538	-0.562815	-24.848	.	-1	-1
chr14	93683201	93683289	89	6	0.915448	0.38225	0.533198	24.8399	.	-1	-1
chr18	18297824	18300712	2889	6	0.259598	0.883543	-0.623945	-24.8231	.	-1	-1
chr7	136809248	136809313	66	6	0.616124	0.0784819	0.537642	24.7592	.	-1	-1
chr12	28332693	28332865	173	6	0.882907	0.328436	0.554471	24.7342	.	-1	-1
chrX	127749911	127750011	101	7	0.43133	0.920596	-0.489266	-24.6948	.	-1	-1
chr4	112753488	112753599	112	6	0.237926	0.813872	-0.575946	-24.6348	.	-1	-1
chr17	363549	363645	97	7	0.244894	0.797984	-0.55309	-24.6248	.	-1	-1
chr20	27395448	27395607	160	6	0.224572	0.898087	-0.673515	-24.5979	.	-1	-1
chr2	138330866	138330983	118	6	0.34068	0.91389	-0.573209	-24.5855	.	-1	-1
chrX	81326644	81326745	102	7	0.830235	0.302461	0.527774	24.5503	.	-1	-1
chr2	40169101	40169288	188	6	0.913854	0.336855	0.576999	24.5359	.	-1	-1
chr16	50552280	50552423	144	7	0.449491	0.950102	-0.500611	-24.5054	.	-1	-1
chr6	59757280	59757365	86	8	0.373341	0.891042	-0.517701	-24.4917	.	-1	-1
chr8	100586841	100587241	401	4	0.927104	0.241146	0.685958	24.4705	.	-1	-1
chr15	82344209	82344316	108	7	0.44283	0.922039	-0.47921	-24.4703	.	-1	-1
chr2	35767778	35767979	202	7	0.703664	0.22288	0.480784	24.4564	.	-1	-1
chr4	166118478	166118641	164	6	0.308052	0.926207	-0.618155	-24.4538	.	-1	-1
chr6	59130985	59131204	220	7	0.226085	0.760556	-0.534471	-24.3439	.	-1	-1
chrX	97597589	97597746	158	7	0.877925	0.430884	0.447041	24.3272	.	-1	-1
chrX	133315172	133315316	145	6	0.233237	0.819221	-0.585984	-24.3173	.	-1	-1
chr14	45452916	45453042	127	6	0.679862	0.10503	0.574832	24.3033	.	-1	-1
chr8	16984377	16984486	110	7	0.523125	0.950401	-0.427276	-24.272	.	-1	-1
chr9	73621861	73622120	260	6	0.821693	0.220159	0.601534	24.2345	.	-1	-1
chrX	148951097	148951181	85	6	0.150623	0.74932	-0.598696	-24.2328	.	-1	-1
chr2	230167182	230167413	232	7	0.910028	0.433287	0.476741	24.1824	.	-1	-1
chr14	47110263	47110941	679	6	0.785903	0.188164	0.597739	24.0801	.	-1	-1
chr4	65404390	65404463	74	6	0.956356	0.341189	0.615168	24.0454	.	-1	-1
chr16	33722907	33722968	62	8	0.334544	0.790914	-0.45637	-23.9724	.	-1	-1
chr4	173308818	173308898	81	7	0.530275	0.964273	-0.433998	-23.9449	.	-1	-1
chrX	66286290	66286354	65	7	0.842104	0.33698	0.505124	23.9278	.	-1	-1
chr7	63280280	63280353	74	8	0.618857	0.174567	0.44429	23.8572	.	-1	-1
chr12	36886162	36886248	87	6	0.224572	0.895282	-0.67071	-23.8459	.	-1	-1
chr9	22986641	22986929	289	6	0.86973	0.312528	0.557203	23.8236	.	-1	-1
chr5	78507506	78507784	279	6	0.764501	0.221813	0.542688	23.7965	.	-1	-1
chr16	80527467	80527638	172	7	0.174521	0.631176	-0.456654	-23.7884	.	-1	-1
chr2	92824980	92825498	519	7	0.343217	0.903601	-0.560384	-23.7202	.	-1	-1
chrX	27264969	27265091	123	6	0.104544	0.703219	-0.598674	-23.7139	.	-1	-1
chrX	62281911	62282000	90	8	0.761222	0.257855	0.503367	23.7083	.	-1	-1
chr8	88230208	88230347	140	7	0.146606	0.592584	-0.445978	-23.6971	.	-1	-1
chr5	68702147	68702364	218	6	0.322834	0.885164	-0.56233	-23.6911	.	-1	-1
chr13	16352424	16352522	99	8	0.137181	0.619183	-0.482002	-23.6867	.	-1	-1
chr3	135855435	135855599	165	6	0.259692	0.811585	-0.551893	-23.6715	.	-1	-1
chr15	28593104	28593232	129	7	0.415385	0.880387	-0.465002	-23.6237	.	-1	-1
chr13	58030678	58030819	142	5	0.169491	0.89338	-0.723888	-23.5936	.	-1	-1
chr5	64481779	64482686	908	7	0.266318	0.738769	-0.47245	-23.5482	.	-1	-1
chrUn_GL000224v1	8754	8846	93	6	0.874529	0.292271	0.582258	23.5465	.	-1	-1
chr22	12291833	12291913	81	4	0.905304	0.106229	0.799075	23.5111	.	-1	-1
chr1	105062474	105063049	576	4	0.182765	0.85414	-0.671375	-23.5011	.	-1	-1
chr12	36495798	36495992	195	7	0.430291	0.895718	-0.465426	-23.4836	.	-1	-1
chrX	12650029	12650171	143	6	0.758789	0.224655	0.534134	23.405	.	-1	-1
chr4	174217978	174218038	61	7	0.639574	0.211329	0.428245	23.3578	.	-1	-1
chr10	25269619	25269848	230	7	0.67037	0.225337	0.445033	23.3317	.	-1	-1
chr2	184840186	184840327	142	7	0.578452	0.131703	0.446749	23.3144	.	-1	-1
chr10	40084637	40084723	87	7	0.740136	0.253593	0.486543	23.2978	.	-1	-1
chr4	158549763	158549837	75	6	0.129701	0.709751	-0.58005	-23.2884	.	-1	-1
chrX	63812777	63812911	135	7	0.301746	0.766258	-0.464511	-23.2525	.	-1	-1
chr13	19438792	19438949	158	6	0.638209	0.087336	0.550873	23.2215	.	-1	-1
chrX	14599320	14599410	91	6	0.927112	0.397291	0.529821	23.2158	.	-1	-1
chr18	29235261	29235378	118	5	0.113039	0.719121	-0.606081	-23.2075	.	-1	-1
chr2	139895683	139895934	252	6	0.897496	0.340636	0.55686	23.1506	.	-1	-1
chr13	54446384	54446494	111	6	0.289795	0.909572	-0.619777	-23.1405	.	-1	-1
chr4	145808490	145808615	126	6	0.685218	0.113582	0.571636	23.1344	.	-1	-1
chr2	12546992	12547086	95	7	0.456251	0.887098	-0.430848	-23.1263	.	-1	-1
chr1	235764259	235764313	55	6	0.871338	0.366298	0.50504	23.0796	.	-1	-1
chr8	110927245	110927405	161	6	0.655218	0.10109	0.554128	23.056	.	-1	-1
chr20	39551909	39552056	148	6	0.854481	0.302777	0.551705	23.0265	.	-1	-1
chrX	112025478	112025629	152	4	0.949107	0.254473	0.694634	23.0251	.	-1	-1
chr1	124259206	124259292	87	5	0.915383	0.201805	0.713577	23.021	.	-1	-1
chr9	81436961	81437125	165	6	0.241317	0.822534	-0.581217	-23.0183	.	-1	-1
chrX	75167960	75168131	172	6	0.137855	0.636201	-0.498346	-22.9886	.	-1	-1
chrX	8604132	8604295	164	7	0.873742	0.417997	0.455745	22.9684	.	-1	-1
chr12	76638706	76638937	232	6	0.378072	0.897411	-0.519339	-22.9535	.	-1	-1
chr8	3151616	3151796	181	6	0.171507	0.777771	-0.606263	-22.9327	.	-1	-1
chr11	90046978	90047074	97	8	0.094488	0.541444	-0.446956	-22.8045	.	-1	-1
chr9	60658003	60658104	102	5	0.169491	0.895143	-0.725652	-22.7871	.	-1	-1
chr2	207229222	207229345	124	6	0.859972	0.266981	0.592991	22.7754	.	-1	-1
chr18	29099347	29099730	384	7	0.0967956	0.587821	-0.491025	-22.731	.	-1	-1
chr6	9815172	9815305	134	6	0.657396	0.141416	0.515981	22.7094	.	-1	-1
chr17	36576372	36576510	139	7	0.389453	0.87953	-0.490077	-22.6911	.	-1	-1
chr9	78812397	78812514	118	7	0.452936	0.926062	-0.473126	-22.6726	.	-1	-1
chr3	73503334	73503503	170	6	0.813677	0.223096	0.590581	22.6713	.	-1	-1
chr18	18084925	18085015	91	7	0.880096	0.297607	0.582489	22.6381	.	-1	-1
chrX	52304248	52304327	80	7	0.225909	0.744197	-0.518287	-22.631	.	-1	-1
chr13	53332846	53332963	118	6	0.391154	0.92629	-0.535136	-22.6303	.	-1	-1
chr5	13346581	13346637	57	6	0.183263	0.732893	-0.549629	-22.6101	.	-1	-1
chr3	93353445	93353555	111	7	0.247558	0.845365	-0.597807	-22.5964	.	-1	-1
chr6	76641596	76641872	277	6	0.225691	0.790398	-0.564707	-22.5892	.	-1	-1
chr18	24728308	24728361	54	7	0.496637	0.928208	-0.431571	-22.5861	.	-1	-1
chr9	28012510	28012644	135	6	0.835472	0.275953	0.55952	22.582	.	-1	-1
chr20	26980181	26980251	71	7	0.802039	0.28628	0.515759	22.5695	.	-1	-1
chr2	124923028	124923133	106	7	0.661837	0.135823	0.526014	22.5687	.	-1	-1
chrX	11093196	11093312	117	6	0.288967	0.810649	-0.521682	-22.4899	.	-1	-1
chr15	31077240	31077411	172	6	0.699473	0.17277	0.526703	22.4669	chr15	31077170	31077447
chr13	85621816	85621926	111	6	0.788888	0.209081	0.579807	22.4477	.	-1	-1
chr9	86508505	86508622	118	7	0.880856	0.415412	0.465444	22.4454	.	-1	-1
chr8	62248333	62248405	73	7	0.578314	0.190432	0.387882	22.4338	.	-1	-1
chrX	106415058	106415182	125	6	0.910595	0.432812	0.477783	22.4254	.	-1	-1
chrX	69512452	69512571	120	6	0.782617	0.285426	0.497191	22.4243	.	-1	-1
chr5	74116191	74116399	209	6	0.906919	0.382518	0.524401	22.3631	.	-1	-1
chr8	45287016	45287142	127	7	0.789454	0.304696	0.484758	22.359	.	-1	-1
chr20	33977712	33977823	112	6	0.360558	0.936235	-0.575677	-22.3502	.	-1	-1
chr16	51249477	51249734	258	7	0.29194	0.721986	-0.430046	-22.3309	.	-1	-1
chrX	22303917	22304019	103	7	0.76176	0.28156	0.4802	22.3244	.	-1	-1
chr11	52885686	52885739	54	7	0.247558	0.845365	-0.597807	-22.3205	.	-1	-1
chrX	129129824	129129989	166	6	0.899542	0.360564	0.538978	22.2293	.	-1	-1
chrX	46257639	46257734	96	6	0.810887	0.277151	0.533736	22.2293	.	-1	-1
chr18	28873274	28873407	134	6	0.906393	0.395116	0.511277	22.2142	.	-1	-1
chr2	58194238	58194467	230	6	0.485419	0.958553	-0.473134	-22.1807	.	-1	-1
chr8	6330193	6330271	79	7	0.434777	0.871908	-0.437131	-22.1761	.	-1	-1
chr4	151907657	151907938	282	6	0.697233	0.183474	0.513758	22.1691	.	-1	-1
chrX	10861641	10861868	228	6	0.755429	0.255317	0.500112	22.1532	.	-1	-1
chr10	70392137	70392317	181	6	0.323713	0.835841	-0.512128	-22.1071	.	-1	-1
chr18	15840867	15840956	90	7	0.347706	0.897791	-0.550084	-22.0732	.	-1	-1
chr8	117988727	117988823	97	7	0.889934	0.365587	0.524347	22.0293	.	-1	-1
chr3	55989093	55989144	52	6	0.92184	0.362196	0.559644	22.0116	.	-1	-1
chr3	60997629	60997809	181	6	0.792028	0.242018	0.55001	21.9997	.	-1	-1
chr8	45290833	45290931	99	6	0.185165	0.759141	-0.573977	-21.9973	.	-1	-1
chr8	78302497	78302653	157	6	0.821556	0.284173	0.537382	21.9945	.	-1	-1
chrX	151158266	151158354	89	5	0.0912813	0.605546	-0.514264	-21.9853	.	-1	-1
chr10	10480956	10481018	63	7	0.728023	0.250887	0.477137	21.9643	.	-1	-1
chr12	100696840	100696929	90	6	0.932472	0.402387	0.530086	21.948	.	-1	-1
chr2	144231904	144232000	97	6	0.942034	0.375143	0.56689	21.9279	.	-1	-1
chr13	55518832	55519008	177	5	0.897246	0.367624	0.529622	21.9156	.	-1	-1
chr20	3613331	3613410	80	7	0.512578	0.918115	-0.405537	-21.8972	.	-1	-1
chr9	9731566	9731726	161	6	0.660601	0.112707	0.547894	21.8789	.	-1	-1
chrX	50832470	50832664	195	6	0.218688	0.764554	-0.545866	-21.8567	.	-1	-1
chr12	103312967	103313213	247	6	0.695162	0.18263	0.512532	21.8561	.	-1	-1
chrX	30401042	30401274	233	6	0.275288	0.820308	-0.54502	-21.8297	.	-1	-1
chr15	49484247	49484456	210	6	0.795286	0.224513	0.570773	21.8289	.	-1	-1
chr8	42148556	42148631	76	6	0.938224	0.416452	0.521771	21.8183	.	-1	-1
chr13	61355299	61355537	239	6	0.358978	0.899706	-0.540727	-21.8165	.	-1	-1
chr20	27098770	27098854	85	7	0.8366	0.251658	0.584942	21.8155	.	-1	-1
chr9	80764369	80764468	100	7	0.8366	0.251658	0.584942	21.8155	.	-1	-1
chr10	3282158	3282218	61	7	0.402285	0.82019	-0.417905	-21.8084	.	-1	-1
chr5	64974074	64974174	101	7	0.917109	0.43826	0.47885	21.7836	.	-1	-1
chr21	5379464	5379518	55	7	0.431725	0.928095	-0.49637	-21.7478	.	-1	-1
chr13	16681917	16682014	98	7	0.416033	0.895099	-0.479067	-21.7272	.	-1	-1
chr16	36892450	36892535	86	7	0.8366	0.251658	0.584942	21.6983	.	-1	-1
chr7	85489515	85489866	352	6	0.833428	0.269708	0.563719	21.6514	.	-1	-1
chr18	60970148	60970207	60	6	0.928953	0.437528	0.491426	21.6514	.	-1	-1
chrX	130746015	130746303	289	6	0.206077	0.727729	-0.521652	-21.6398	.	-1	-1
chr18	20768892	20768986	95	6	0.850606	0.264323	0.586283	21.6156	.	-1	-1
chr11	128076489	128076554	66	6	0.28086	0.803194	-0.522334	-21.5889	.	-1	-1
chr8	15974513	15974826	314	6	0.698718	0.163149	0.53557	21.5859	.	-1	-1
chr13	91141967	91142056	90	7	0.686293	0.206972	0.479322	21.5642	.	-1	-1
chr6	137873330	137873406	77	6	0.931484	0.470394	0.461089	21.5519	chr6	137873388	137873687
chr4	118365832	118365902	71	7	0.458017	0.886927	-0.42891	-21.5491	.	-1	-1
chr15	59771664	59771872	209	6	0.903819	0.367991	0.535827	21.5169	.	-1	-1
chrY	11204477	11204549	73	7	0.169491	0.711904	-0.542412	-21.5068	.	-1	-1
chrX	133128841	133128935	95	7	0.352493	0.832441	-0.479948	-21.5064	.	-1	-1
chrX	22877798	22877880	83	7	0.731089	0.273055	0.458034	21.4976	.	-1	-1
chrX	106520281	106520471	191	7	0.408189	0.827053	-0.418864	-21.4746	.	-1	-1
chr9	22979960	22980042	83	6	0.629503	0.119918	0.509584	21.4512	.	-1	-1
chr2	29695402	29695539	138	6	0.371681	0.882532	-0.510851	-21.4443	.	-1	-1
chr3	18807428	18807492	65	6	0.179181	0.738499	-0.559318	-21.4301	.	-1	-1
chr4	12305144	12305302	159	6	0.0613399	0.537477	-0.476137	-21.426	.	-1	-1
chr17	59261091	59261186	96	7	0.563505	0.919429	-0.355924	-21.4258	.	-1	-1
chr3	169399	169531	133	6	0.077774	0.56628	-0.488506	-21.3871	.	-1	-1
chr2	240924374	240924443	70	6	0.715153	0.158459	0.556695	21.3758	.	-1	-1
chr9	19130552	19130613	62	7	0.773232	0.325598	0.447634	21.3738	.	-1	-1
chr3	71972626	71972815	190	6	0.876002	0.394188	0.481815	21.3715	.	-1	-1
chr2	92016315	92016385	71	6	0.441059	0.962112	-0.521052	-21.3679	.	-1	-1
chrX	130592483	130592763	281	4	0.744331	0.0899792	0.654351	21.3637	.	-1	-1
chr1	149443715	149445592	1878	6	0.205783	0.634909	-0.429125	-21.337	.	-1	-1
chr2	183924857	183925475	619	6	0.609009	0.0731421	0.535867	21.3124	.	-1	-1
chrX	49342811	49342917	107	7	0.817529	0.277513	0.540016	21.3043	.	-1	-1
chr11	28569765	28569837	73	7	0.64683	0.207382	0.439449	21.2978	.	-1	-1
chr6	159231323	159231376	54	7	0.807836	0.303878	0.503958	21.2704	.	-1	-1
chr3	50976353	50976449	97	5	0.169491	0.873157	-0.703666	-21.2549	.	-1	-1
chr20	32686711	32686780	70	7	0.521095	0.91496	-0.393866	-21.2407	.	-1	-1
chr18	38814622	38814734	113	6	0.61645	0.112858	0.503592	21.1985	.	-1	-1
chr4	17194029	17194128	100	7	0.387848	0.826855	-0.439007	-21.1874	.	-1	-1
chr13	17967942	17968091	150	7	0.750008	0.199048	0.550961	21.1635	.	-1	-1
chr21	9345298	9345465	168	6	0.0883169	0.514157	-0.42584	-21.1615	.	-1	-1
chr5	39708434	39708515	82	6	0.76585	0.258728	0.507122	21.1065	.	-1	-1
chr3	76026899	76027062	164	6	0.780174	0.247861	0.532313	21.0801	.	-1	-1
chr10	59185650	59185890	241	6	0.358453	0.832291	-0.473838	-21.0776	.	-1	-1
chr9	21540627	21540878	252	6	0.354927	0.880583	-0.525655	-21.0596	.	-1	-1
chr8	121901820	121901907	88	7	0.495578	0.920695	-0.425118	-21.0242	.	-1	-1
chr9	43690109	43690199	91	6	0.268142	0.895282	-0.62714	-21.0013	.	-1	-1
chrX	102636450	102636529	80	6	0.166068	0.672287	-0.506219	-20.9743	.	-1	-1
chr11	52898392	52898490	99	7	0.861687	0.297607	0.56408	20.9335	.	-1	-1
chr10	125614205	125614422	218	6	0.243087	0.736903	-0.493817	-20.9033	.	-1	-1
chr2	94073695	94073890	196	5	0.328295	0.935643	-0.607348	-20.903	.	-1	-1
chr9	108359850	108359995	146	6	0.886249	0.391692	0.494557	20.8776	.	-1	-1
chr12	35363108	35363194	87	6	0.156431	0.603792	-0.44736	-20.7942	.	-1	-1
chr2	152019599	152020194	596	4	0.954838	0.312533	0.642305	20.7914	.	-1	-1
chr20	29232841	29232939	99	6	0.247162	0.811382	-0.56422	-20.7817	.	-1	-1
chr13	36572324	36572443	120	6	0.234251	0.784453	-0.550202	-20.7794	.	-1	-1
chr3	18521079	18521295	217	6	0.875431	0.410516	0.464914	20.7769	.	-1	-1
chr14	65840199	65840298	100	6	0.444308	0.927994	-0.483685	-20.76	.	-1	-1
chr15	26734233	26734283	51	7	0.790625	0.33299	0.457635	20.7532	.	-1	-1
chr11	58642988	58643119	132	6	0.712331	0.2243	0.488031	20.7441	.	-1	-1
chr18	18197766	18197816	51	7	0.823547	0.29169	0.531857	20.7398	.	-1	-1
chr2	92378799	92379039	241	6	0.38762	0.876438	-0.488819	-20.7322	.	-1	-1
chr3	32091271	32091379	109	6	0.949009	0.474904	0.474105	20.6791	.	-1	-1
chr9	17618503	17618615	113	6	0.414762	0.961686	-0.546924	-20.676	.	-1	-1
chr3	135026673	135026822	150	6	0.271608	0.807651	-0.536044	-20.6709	.	-1	-1
chrX	87968425	87968694	270	6	0.702352	0.196713	0.505638	20.6511	.	-1	-1
chr3	17039335	17039860	526	5	0.842692	0.284185	0.558508	20.6291	.	-1	-1
chr7	110557974	110558096	123	6	0.237732	0.782174	-0.544442	-20.6156	.	-1	-1
chr11	49222743	49222802	60	6	0.72744	0.156424	0.571016	20.604	.	-1	-1
chr9	2019416	2019522	107	6	0.830942	0.306575	0.524367	20.5924	.	-1	-1
chr3	18699682	18699789	108	7	0.321157	0.773188	-0.452031	-20.5862	.	-1	-1
chr9	4079530	4079585	56	6	0.296925	0.895282	-0.598357	-20.5841	.	-1	-1
chr12	81242235	81242293	59	6	0.471724	0.943011	-0.471287	-20.5692	.	-1	-1
chr2	191666768	191666962	195	5	0.842714	0.283818	0.558896	20.5601	.	-1	-1
chr3	84843784	84843921	138	6	0.359565	0.908485	-0.54892	-20.5305	.	-1	-1
chr3	60117617	60117703	87	6	0.79107	0.228172	0.562898	20.5238	.	-1	-1
chr8	60483133	60483321	189	6	0.278579	0.820417	-0.541839	-20.5145	.	-1	-1
chr12	29682297	29682461	165	6	0.833181	0.321102	0.512079	20.457	.	-1	-1
chr4	128215644	128215739	96	6	0.219024	0.763707	-0.544683	-20.4103	.	-1	-1
chrX	45193930	45194001	72	6	0.913961	0.410714	0.503247	20.3861	.	-1	-1
chr4	160306672	160306865	194	6	0.197823	0.727546	-0.529723	-20.3738	.	-1	-1
chr2	146208356	146208454	99	4	0.95779	0.210946	0.746844	20.3698	.	-1	-1
chr9	28074102	28075088	987	4	0.751318	0.0981868	0.653132	20.3678	.	-1	-1
chr14	46982492	46982544	53	6	0.744855	0.178249	0.566606	20.3631	.	-1	-1
chr6	120538916	120539038	123	6	0.663163	0.177123	0.48604	20.362	.	-1	-1
chrX	11107317	11107485	169	5	0.726509	0.137915	0.588595	20.3597	.	-1	-1
chrX	68901692	68901771	80	6	0.717017	0.221061	0.495956	20.3108	chrX	68901529	68901805
chr6	160332486	160332682	197	6	0.853988	0.366246	0.487741	20.3105	.	-1	-1
chr11	61165902	61165965	64	6	0.342854	0.807326	-0.464472	-20.3038	.	-1	-1
chr19	23378431	23378711	281	6	0.273879	0.820043	-0.546164	-20.3031	.	-1	-1
chr16	31491562	31491696	135	6	0.421943	0.879436	-0.457493	-20.3007	.	-1	-1
chr16	37465582	37465772	191	6	0.33082	0.908485	-0.577665	-20.2636	.	-1	-1
chr5	47098585	47098652	68	5	0.795759	0.290819	0.50494	20.2203	.	-1	-1
chr3	8006845	8006993	149	6	0.654181	0.133404	0.520777	20.1846	.	-1	-1
chr2	57116962	57117012	51	6	0.653179	0.154383	0.498796	20.1652	.	-1	-1
chr22	36590221	36590275	55	6	0.408777	0.849351	-0.440574	-20.1641	.	-1	-1
chr8	57666860	57668084	1225	6	0.928526	0.425792	0.502734	20.1605	.	-1	-1
chr4	179532260	179532321	62	6	0.715351	0.240487	0.474865	20.1578	.	-1	-1
chr8	3227730	3227878	149	5	0.1106	0.73015	-0.61955	-20.1407	.	-1	-1
chrX	63636450	63636563	114	6	0.728482	0.185916	0.542566	20.1352	.	-1	-1
chr1	196013006	196013065	60	6	0.413806	0.951728	-0.537922	-20.1075	.	-1	-1
chr14	47939692	47940037	346	4	0.869638	0.188641	0.680997	20.0874	.	-1	-1
chr6	139740854	139741000	147	6	0.951634	0.516433	0.435201	20.085	.	-1	-1
chr12	20419807	20419959	153	6	0.450929	0.870734	-0.419805	-20.0295	.	-1	-1
chr9	121929048	121929169	122	6	0.577005	0.947092	-0.370086	-20.0288	.	-1	-1
chr18	77628674	77628836	163	6	0.517293	0.967956	-0.450663	-20.0261	.	-1	-1
chr11	99371842	99372018	177	6	0.95366	0.516555	0.437105	20.0195	.	-1	-1
chr3	105634900	105634969	70	6	0.874833	0.349723	0.525109	20.0064	.	-1	-1
chr11	91751022	91751102	81	6	0.885883	0.401574	0.484309	20.0026	.	-1	-1
chr13	53467960	53468076	117	6	0.737228	0.224937	0.512291	19.9809	.	-1	-1
chr16	22811874	22812047	174	6	0.513219	0.0579795	0.455239	19.979	.	-1	-1
chr7	91759663	91759771	109	6	0.205483	0.733697	-0.528214	-19.9702	.	-1	-1
chr18	36809707	36809792	86	6	0.656172	0.0774316	0.57874	19.9197	.	-1	-1
chrX	64421384	64421444	61	6	0.234166	0.730735	-0.496569	-19.903	.	-1	-1
chr20	10912356	10912528	173	6	0.498937	0.918206	-0.419269	-19.9019	.	-1	-1
chr8	118949293	118949362	70	6	0.268142	0.846796	-0.578653	-19.9016	.	-1	-1
chr3	79569816	79569874	59	5	0.414902	0.923142	-0.50824	-19.8707	.	-1	-1
chrX	149213967	149214023	57	4	0.895273	0.205918	0.689355	19.8457	.	-1	-1
chr12	90182641	90182694	54	7	0.740633	0.30279	0.437844	19.8389	.	-1	-1
chr11	85030085	85030276	192	6	0.644161	0.169544	0.474617	19.8364	.	-1	-1
chr10	22118022	22118099	78	6	0.814482	0.302792	0.51169	19.8342	.	-1	-1
chr4	117587141	117587209	69	6	0.503991	0.941297	-0.437306	-19.826	.	-1	-1
chr8	89455020	89455097	78	6	0.81037	0.286937	0.523434	19.7812	.	-1	-1
chr12	104944360	104944472	113	6	0.799814	0.333636	0.466178	19.7794	.	-1	-1
chr8	85390531	85390717	187	6	0.505088	0.919524	-0.414435	-19.7766	.	-1	-1
chr11	46053973	46054037	65	7	0.484094	0.945426	-0.461332	-19.771	.	-1	-1
chr4	115613379	115613602	224	4	0.25985	0.867785	-0.607935	-19.7637	.	-1	-1
chr11	93817420	93817488	69	6	0.803992	0.291905	0.512087	19.7496	.	-1	-1
chr20	30661691	30661823	133	6	0.30962	0.817164	-0.507545	-19.7471	.	-1	-1
chr1	248520381	248520444	64	5	0.25305	0.895143	-0.642094	-19.7437	.	-1	-1
chr10	44906995	44907166	172	6	0.914761	0.432253	0.482508	19.7347	.	-1	-1
chr9	42646042	42646111	70	6	0.850186	0.281448	0.568738	19.726	.	-1	-1
chr5	46659952	46660034	83	6	0.221049	0.782378	-0.561329	-19.6876	.	-1	-1
chr3	166381873	166381995	123	6	0.272742	0.761214	-0.488472	-19.6301	.	-1	-1
chr2	160228453	160228644	192	6	0.406143	0.866681	-0.460538	-19.6191	.	-1	-1
chrX	52597375	52597448	74	5	0.240183	0.910633	-0.67045	-19.618	.	-1	-1
chr4	185534104	185534168	65	6	0.475945	0.917174	-0.441229	-19.6017	.	-1	-1
chr4	126196164	126196252	89	6	0.360953	0.875454	-0.514502	-19.5939	.	-1	-1
chr4	116949675	116949925	251	6	0.409396	0.868089	-0.458693	-19.5616	.	-1	-1
chr11	87232240	87232342	103	5	0.316654	0.95171	-0.635056	-19.5424	.	-1	-1
chr10	16141548	16141763	216	5	0.345386	0.918727	-0.573342	-19.5111	.	-1	-1
chr10	27873191	27873264	74	5	0.235889	0.878586	-0.642697	-19.5027	.	-1	-1
chrX	69746673	69746788	116	6	0.306155	0.803737	-0.497581	-19.5001	.	-1	-1
chr9	8385197	8385253	57	6	0.853361	0.272711	0.58065	19.4913	.	-1	-1
chr2	191788243	191788322	80	4	0.961647	0.33412	0.627527	19.4868	.	-1	-1
chr14	43039704	43039942	239	6	0.615347	0.170095	0.445253	19.4757	.	-1	-1
chr9	28059828	28059894	67	4	0.204326	0.909032	-0.704706	-19.4679	.	-1	-1
chr13	16401545	16401600	56	6	0.797075	0.281079	0.515996	19.4623	.	-1	-1
chr9	71400101	71400206	106	6	0.90186	0.339117	0.562743	19.4496	.	-1	-1
chr17	23339753	23339851	99	6	0.850186	0.288577	0.56161	19.4479	.	-1	-1
chr6	58755631	58755693	63	6	0.169199	0.658885	-0.489685	-19.4406	.	-1	-1
chr7	39094178	39094230	53	6	0.957637	0.500026	0.457611	19.4352	.	-1	-1
chr5	75178920	75179061	142	5	0.869749	0.324647	0.545102	19.4279	.	-1	-1
chrX	63728078	63728143	66	6	0.847733	0.339095	0.508638	19.4038	.	-1	-1
chr12	14632151	14632267	117	4	0.368635	0.960967	-0.592332	-19.3999	.	-1	-1
chr13	107412731	107412822	92	6	0.211647	0.73319	-0.521543	-19.3955	.	-1	-1
chr20	9037965	9038094	130	6	0.412571	0.924175	-0.511604	-19.3913	.	-1	-1
chr18	28114478	28114695	218	6	0.401832	0.844555	-0.442722	-19.3799	.	-1	-1
chr8	121975020	121975260	241	6	0.345708	0.831141	-0.485433	-19.3607	.	-1	-1
chr1	29999486	29999712	227	4	0.360484	0.964818	-0.604334	-19.3605	.	-1	-1
chr15	27384494	27384548	55	6	0.514488	0.954064	-0.439576	-19.3286	.	-1	-1
chr11	101475889	101475975	87	6	0.61284	0.159461	0.453379	19.328	.	-1	-1
chr9	28046387	28046449	63	6	0.914761	0.39503	0.51973	19.3237	.	-1	-1
chr14	39835909	39836120	212	4	0.15756	0.80716	-0.6496	-19.3182	.	-1	-1
chr7	63280110	63280179	70	6	0.58733	0.172993	0.414337	19.3078	.	-1	-1
chr1	219762464	219762550	87	4	0.916447	0.175093	0.741354	19.2969	.	-1	-1
chr13	81650254	81650343	90	6	0.413274	0.924836	-0.511562	-19.2946	.	-1	-1
chr8	2853921	2854021	101	5	0.159148	0.678804	-0.519656	-19.258	.	-1	-1
chr4	160946834	160946892	59	6	0.702966	0.187242	0.515724	19.251	.	-1	-1
chr1	146348641	146348776	136	6	0.372159	0.910633	-0.538475	-19.2442	.	-1	-1
chr7	45406982	45407053	72	6	0.246341	0.720136	-0.473795	-19.2159	.	-1	-1
chr16	82672953	82673062	110	5	0.0789556	0.50928	-0.430325	-19.213	.	-1	-1
chr18	12479722	12479789	68	6	0.335091	0.85691	-0.521818	-19.2098	.	-1	-1
chr2	138339994	138340067	74	6	0.497505	0.938824	-0.44132	-19.1766	.	-1	-1
chr19	31797820	31797876	57	4	0.8785	0.221643	0.656857	19.1675	.	-1	-1
chr8	90264871	90264965	95	6	0.420069	0.899781	-0.479713	-19.1573	.	-1	-1
chrX	51523774	51523853	80	6	0.309223	0.740389	-0.431166	-19.1142	.	-1	-1
chr18	39899477	39899554	78	4	0.1514	0.821538	-0.670138	-19.0977	.	-1	-1
chrX	22799007	22799064	58	4	0.855429	0.147382	0.708047	19.0861	.	-1	-1
chr18	60635610	60635665	56	4	0.831054	0.149842	0.681213	19.0807	.	-1	-1
chr10	41055355	41055507	153	6	0.887104	0.409338	0.477765	19.074	.	-1	-1
chrX	132070134	132070251	118	5	0.271927	0.8089	-0.536974	-19.0638	.	-1	-1
chr5	88844420	88844498	79	5	0.158124	0.692892	-0.534767	-19.025	.	-1	-1
chr13	18412397	18412454	58	6	0.535265	0.097164	0.438101	19.0134	.	-1	-1
chr3	182301237	182301292	56	6	0.410732	0.904318	-0.493586	-19.0009	.	-1	-1
chr12	107191098	107191157	60	6	0.30858	0.847402	-0.538822	-18.9882	.	-1	-1
chr1	152292076	152292129	54	7	0.443605	0.900578	-0.456973	-18.984	.	-1	-1
chr17	24224738	24224807	70	4	0.905304	0.231652	0.673652	18.9716	.	-1	-1
chr14	20109241	20109295	55	4	0.214372	0.893988	-0.679616	-18.9696	.	-1	-1
chr4	10901890	10901970	81	6	0.799018	0.316857	0.482161	18.9447	.	-1	-1
chrX	85034637	85034899	263	5	0.496935	0.942435	-0.4455	-18.943	.	-1	-1
chr14	46957547	46957608	62	6	0.128894	0.55312	-0.424226	-18.9186	.	-1	-1
chrX	45972905	45973031	127	5	0.884244	0.298364	0.58588	18.8502	.	-1	-1
chr6	6156826	6157002	177	5	0.111728	0.654645	-0.542917	-18.8438	.	-1	-1
chr13	16578066	16578500	435	8	0.387742	0.768056	-0.380314	-18.8187	.	-1	-1
chr3	12032375	12032526	152	5	0.351639	0.929484	-0.577845	-18.8053	.	-1	-1
chr3	92412275	92412332	58	4	0.169491	0.910633	-0.741142	-18.7911	.	-1	-1
chr8	24937650	24937832	183	5	0.800687	0.205701	0.594986	18.7822	.	-1	-1
chr22	18640986	18641082	97	5	0.863417	0.2847	0.578718	18.759	.	-1	-1
chr14	27826206	27826300	95	5	0.136751	0.759484	-0.622732	-18.7432	.	-1	-1
chr3	118907979	118908176	198	4	0.942084	0.267927	0.674156	18.7363	.	-1	-1
chrX	20685034	20685150	117	5	0.135217	0.744681	-0.609464	-18.7361	.	-1	-1
chr8	96868474	96869565	1092	5	0.860429	0.310644	0.549785	18.729	.	-1	-1
chr6	81233662	81233848	187	4	0.245678	0.887857	-0.642178	-18.7157	.	-1	-1
chr12	9551659	9552080	422	5	0.365398	0.923124	-0.557726	-18.6917	.	-1	-1
chr11	90740977	90741232	256	5	0.284857	0.820767	-0.53591	-18.6875	.	-1	-1
chr18	66790450	66790543	94	4	0.756804	0.0971339	0.65967	18.6713	.	-1	-1
chr9	42948761	42948861	101	4	0.178683	0.909032	-0.730349	-18.6671	.	-1	-1
chr13	38037928	38038150	223	5	0.498249	0.952464	-0.454215	-18.6425	.	-1	-1
chr9	7286025	7286113	89	5	0.822411	0.239247	0.583164	18.6133	.	-1	-1
chrX	139775575	139775735	161	4	0.945605	0.332447	0.613158	18.6121	.	-1	-1
chr18	37917841	37917922	82	4	0.170281	0.839262	-0.66898	-18.6094	.	-1	-1
chr15	26731997	26732060	64	6	0.410809	0.845119	-0.43431	-18.5967	.	-1	-1
chr2	188119163	188119216	54	4	0.883957	0.174598	0.709359	18.5767	.	-1	-1
chr1	175330622	175330713	92	4	0.917576	0.269118	0.648459	18.5683	.	-1	-1
chr9	44401051	44401131	81	4	0.905304	0.171993	0.733311	18.568	.	-1	-1
chr8	88688897	88688991	95	6	0.268142	0.858301	-0.590159	-18.5398	.	-1	-1
chr17	25964204	25964302	99	6	0.268142	0.858301	-0.590159	-18.5398	.	-1	-1
chr2	19083668	19083785	118	6	0.284981	0.771115	-0.486134	-18.521	.	-1	-1
chr2	52157202	52157285	84	4	0.813708	0.17342	0.640288	18.5054	.	-1	-1
chr18	17778785	17779069	285	5	0.293632	0.910633	-0.617001	-18.5043	.	-1	-1
chr16	30292324	30292399	76	6	0.414762	0.933017	-0.518255	-18.4643	.	-1	-1
chr20	39143134	39143384	251	6	0.218783	0.728501	-0.509718	-18.4558	.	-1	-1
chr5	85642294	85642569	276	5	0.462891	0.916421	-0.45353	-18.4529	.	-1	-1
chr6	58566710	58566867	158	6	0.283372	0.757356	-0.473984	-18.4408	.	-1	-1
chr18	18934386	18934447	62	6	0.268142	0.858301	-0.590159	-18.4077	.	-1	-1
chr7	59061039	59061125	87	6	0.268142	0.858301	-0.590159	-18.4051	.	-1	-1
chr12	29988533	29988778	246	5	0.235264	0.769279	-0.534014	-18.4016	.	-1	-1
chr10	92643717	92643801	85	5	0.532931	0.969193	-0.436263	-18.4004	.	-1	-1
chrX	148625329	148625405	77	4	0.232687	0.922255	-0.689568	-18.3836	.	-1	-1
chr9	45127303	45127378	76	6	0.268142	0.858301	-0.590159	-18.3629	.	-1	-1
chrX	61292989	61293060	72	6	0.268142	0.858301	-0.590159	-18.3629	.	-1	-1
chr18	18702545	18702601	57	4	0.905304	0.171993	0.733311	18.3602	.	-1	-1
chr13	16324416	16324480	65	4	0.905304	0.171993	0.733311	18.3602	.	-1	-1
chr18	19990372	19990456	85	5	0.888963	0.286653	0.60231	18.3352	.	-1	-1
chr20	27338041	27338126	86	6	0.268142	0.858301	-0.590159	-18.3277	.	-1	-1
chr5	22507087	22507139	53	6	0.733328	0.215729	0.517599	18.325	.	-1	-1
chr16	80788055	80788243	189	5	0.342233	0.878353	-0.53612	-18.3221	.	-1	-1
chr18	15667511	15667563	53	6	0.268142	0.858301	-0.590159	-18.3211	.	-1	-1
chr6	32327320	32327460	141	6	0.538218	0.948266	-0.410048	-18.2977	.	-1	-1
chr11	51968717	51968767	51	6	0.268142	0.858301	-0.590159	-18.2835	.	-1	-1
chr16	34002333	34002581	249	5	0.359094	0.927979	-0.568884	-18.2721	.	-1	-1
chr2	64392588	64392660	73	5	0.931034	0.397295	0.533739	18.2663	.	-1	-1
chr4	157252280	157252343	64	5	0.240183	0.895143	-0.65496	-18.2561	.	-1	-1
chr2	131284922	131285004	83	5	0.279498	0.895143	-0.615645	-18.2389	.	-1	-1
chr7	60765159	60765261	103	6	0.620743	0.16837	0.452373	18.2118	.	-1	-1
chr14	85980136	85980240	105	5	0.74357	0.184723	0.558847	18.206	.	-1	-1
chr2	146040148	146040307	160	5	0.42817	0.951206	-0.523036	-18.1377	.	-1	-1
chrX	31535510	31535839	330	5	0.873245	0.301237	0.572007	18.1024	.	-1	-1
chr12	44248570	44248631	62	6	0.917003	0.458292	0.458711	18.1015	.	-1	-1
chr11	30133306	30133537	232	5	0.608353	0.126288	0.482065	18.0596	.	-1	-1
chr4	110940429	110940789	361	5	0.698423	0.187852	0.510571	18.0362	.	-1	-1
chrX	132272103	132272535	433	5	0.748183	0.254367	0.493817	18.034	.	-1	-1
chr3	63005832	63005910	79	4	0.903613	0.210806	0.692807	18.0297	.	-1	-1
chr14	53441890	53441951	62	6	0.876046	0.348959	0.527087	18.0213	.	-1	-1
chrX	102791678	102791795	118	4	0.897203	0.287088	0.610115	18.0027	.	-1	-1
chr3	74024023	74024117	95	5	0.128189	0.656835	-0.528645	-17.9874	.	-1	-1
chr2	126067508	126067593	86	5	0.780076	0.235674	0.544401	17.9729	.	-1	-1
chrX	54838972	54839060	89	4	0.822513	0.130485	0.692028	17.962	.	-1	-1
chr10	49642735	49643064	330	5	0.282845	0.797706	-0.514861	-17.9587	.	-1	-1
chr19	42623799	42623926	128	5	0.432176	0.943038	-0.510862	-17.9575	.	-1	-1
chr9	26645624	26645714	91	5	0.716407	0.104683	0.611724	17.8626	.	-1	-1
chr4	78992570	78992717	148	5	0.388884	0.864454	-0.47557	-17.851	.	-1	-1
chr9	27896597	27896764	168	5	0.696398	0.192736	0.503662	17.8509	.	-1	-1
chr14	30481262	30481314	53	4	0.856066	0.221867	0.634199	17.8447	.	-1	-1
chr3	117472145	117472598	454	5	0.868761	0.347836	0.520925	17.8298	.	-1	-1
chr19	9001990	9002072	83	5	0.613313	0.140091	0.473222	17.7134	.	-1	-1
chr7	59862557	59862665	109	6	0.316912	0.782031	-0.465119	-17.6837	.	-1	-1
chr5	57404187	57404359	173	5	0.421985	0.903421	-0.481435	-17.6496	.	-1	-1
chr12	35698490	35698706	217	5	0.931034	0.407062	0.523973	17.6352	.	-1	-1
chr4	96446579	96446945	367	5	0.172648	0.644615	-0.471967	-17.6245	.	-1	-1
chrX	117904985	117905109	125	5	0.700077	0.177938	0.522139	17.6222	.	-1	-1
chr3	79137091	79137254	164	5	0.628991	0.131261	0.49773	17.6194	.	-1	-1
chr2	122148596	122148679	84	5	0.153398	0.736262	-0.582863	-17.5916	.	-1	-1
chr18	24625565	24625754	190	4	0.377183	0.950102	-0.572919	-17.5876	.	-1	-1
chr13	50257661	50257870	210	5	0.376918	0.870084	-0.493166	-17.5808	.	-1	-1
chr15	52492246	52492343	98	5	0.900246	0.399025	0.501221	17.5706	.	-1	-1
chr18	16118652	16118741	90	4	0.169491	0.890393	-0.720902	-17.551	.	-1	-1
chr17	42329078	42329213	136	4	0.916275	0.38223	0.534045	17.5468	chr17	42329058	42329332
chr2	169463569	169463799	231	5	0.700904	0.209566	0.491338	17.51	.	-1	-1
chr10	58674977	58675043	67	4	0.265709	0.907506	-0.641797	-17.5021	.	-1	-1
chrX	130670514	130670588	75	6	0.305635	0.790687	-0.485052	-17.4937	.	-1	-1
chrX	60228511	60228591	81	4	0.169491	0.890393	-0.720902	-17.4691	.	-1	-1
chr10	115616697	115616920	224	4	0.864798	0.297431	0.567367	17.4501	.	-1	-1
chr3	35313932	35314021	90	5	0.619767	0.0846507	0.535116	17.4315	.	-1	-1
chr2	134476432	134476657	226	4	0.127174	0.761544	-0.63437	-17.4258	.	-1	-1
chr14	71879010	71879091	82	4	0.91244	0.330481	0.581958	17.4066	.	-1	-1
chr20	6861513	6861602	90	4	0.212299	0.921188	-0.708889	-17.3831	.	-1	-1
chr1	187883612	187883673	62	4	0.76045	0.139892	0.620557	17.3466	.	-1	-1
chr6	97403912	97404054	143	4	0.354736	0.958532	-0.603796	-17.3443	.	-1	-1
chr7	60780994	60781079	86	5	0.885181	0.24412	0.641061	17.3331	.	-1	-1
chr12	78801114	78801183	70	5	0.2901	0.819397	-0.529297	-17.3321	.	-1	-1
chr4	143905270	143905927	658	5	0.325706	0.863877	-0.538171	-17.3248	.	-1	-1
chr20	13947187	13947270	84	5	0.153398	0.762905	-0.609507	-17.2987	.	-1	-1
chr19	36386117	36386339	223	4	0.823107	0.197518	0.625588	17.284	.	-1	-1
chr15	45264019	45264090	72	4	0.386195	0.937215	-0.551019	-17.2765	.	-1	-1
chr7	98755027	98755113	87	5	0.287529	0.873157	-0.585628	-17.2708	.	-1	-1
chr18	60982068	60982268	201	4	0.867535	0.261263	0.606272	17.2682	.	-1	-1
chr16	37252656	37252894	239	5	0.296152	0.815577	-0.519425	-17.2665	.	-1	-1
chr11	128415642	128415891	250	5	0.832996	0.338546	0.494449	17.258	.	-1	-1
chr6	77260098	77260256	159	5	0.33091	0.771886	-0.440976	-17.2524	.	-1	-1
chr11	3788674	3788737	64	5	0.433522	0.948549	-0.515027	-17.2414	.	-1	-1
chrX	31771765	31771833	69	5	0.864098	0.341881	0.522217	17.2382	.	-1	-1
chr7	79064794	79065657	864	4	0.244575	0.870023	-0.625448	-17.2109	.	-1	-1
chr3	165676918	165677054	137	5	0.258244	0.746957	-0.488713	-17.2088	.	-1	-1
chr3	62467545	62467760	216	5	0.643813	0.181641	0.462172	17.2034	.	-1	-1
chr13	90995676	90995751	76	5	0.888963	0.340051	0.548912	17.1919	.	-1	-1
chr8	99692400	99692531	132	5	0.767927	0.229448	0.538479	17.1787	.	-1	-1
chr16	73827614	73827709	96	5	0.239384	0.718848	-0.479464	-17.1755	.	-1	-1
chr4	95917215	95917590	376	5	0.107674	0.67663	-0.568956	-17.1389	.	-1	-1
chr20	22063650	22063711	62	4	0.102724	0.734951	-0.632227	-17.1296	.	-1	-1
chrX	141699294	141699415	122	5	0.720835	0.221717	0.499118	17.1154	.	-1	-1
chrX	111760846	111761045	200	4	0.886285	0.280299	0.605986	17.1033	.	-1	-1
chr11	53087117	53087214	98	4	0.883957	0.171993	0.711964	17.1008	.	-1	-1
chr9	78881746	78881807	62	5	0.242671	0.722277	-0.479606	-17.0688	.	-1	-1
chr1	149762605	149762673	69	4	0.15634	0.790081	-0.633741	-17.0367	.	-1	-1
chr2	89937432	89939150	1719	14	0.475342	0.316815	0.158527	17.0115	.	-1	-1
chr13	16647917	16647991	75	6	0.295786	0.719318	-0.423532	-17.0016	.	-1	-1
chr2	17623936	17624003	68	5	0.963547	0.526277	0.43727	16.9953	.	-1	-1
chr13	87507047	87507228	182	4	0.310345	0.939133	-0.628789	-16.9796	.	-1	-1
chr18	44502114	44502285	172	4	0.951507	0.376006	0.575502	16.9732	.	-1	-1
chr1	208633460	208633611	152	4	0.258568	0.879055	-0.620486	-16.9689	.	-1	-1
chr2	27741460	27741535	76	5	0.407201	0.85302	-0.445818	-16.9682	.	-1	-1
chrX	7477265	7477386	122	5	0.660562	0.141658	0.518904	16.9591	.	-1	-1
chr12	47151291	47151415	125	4	0.288472	0.887395	-0.598923	-16.9305	.	-1	-1
chr9	44354321	44354410	90	5	0.169491	0.766466	-0.596975	-16.9262	.	-1	-1
chrX	22964367	22964460	94	5	0.377466	0.849246	-0.47178	-16.9171	.	-1	-1
chr3	80983993	80984124	132	5	0.345271	0.839433	-0.494162	-16.8703	.	-1	-1
chr8	692953	693028	76	5	0.574337	0.111596	0.462741	16.8682	.	-1	-1
chr2	40962995	40963072	78	4	0.705268	0.0721006	0.633167	16.8543	.	-1	-1
chr2	153906932	153907171	240	5	0.727436	0.210056	0.517379	16.8376	.	-1	-1
chr13	56331335	56331392	58	5	0.262141	0.817317	-0.555176	-16.8308	.	-1	-1
chr18	18123419	18123508	90	4	0.868513	0.179446	0.689067	16.8227	.	-1	-1
chr9	116085480	116085536	57	5	0.654039	0.153673	0.500366	16.8224	.	-1	-1
chrX	31297604	31297785	182	4	0.372184	0.957648	-0.585464	-16.8191	.	-1	-1
chr2	126374329	126374423	95	5	0.214494	0.705933	-0.491439	-16.809	.	-1	-1
chrX	128025581	128025807	227	5	0.751988	0.286136	0.465852	16.7904	.	-1	-1
chr2	29675456	29675529	74	4	0.832981	0.210261	0.62272	16.7785	.	-1	-1
chr13	16387897	16387960	64	5	0.240183	0.873157	-0.632974	-16.7777	.	-1	-1
chr14	62706351	62706451	101	4	0.65433	0.0789295	0.5754	16.7711	.	-1	-1
chr18	17517928	17518002	75	4	0.207698	0.910633	-0.702936	-16.7621	.	-1	-1
chr11	51954711	51954808	98	4	0.207698	0.910633	-0.702936	-16.7621	.	-1	-1
chr16	52634000	52634151	152	5	0.381558	0.869053	-0.487495	-16.7319	.	-1	-1
chr15	30246361	30247211	851	5	0.352459	0.876862	-0.524404	-16.7254	.	-1	-1
chr7	59386440	59386630	191	5	0.812256	0.267314	0.544942	16.7227	.	-1	-1
chr15	41757834	41757931	98	4	0.939379	0.307337	0.632042	16.7094	.	-1	-1
chr14	64539354	64539453	100	5	0.700844	0.29051	0.410334	16.7069	.	-1	-1
chr18	75438340	75438490	151	4	0.290231	0.887232	-0.597001	-16.6995	.	-1	-1
chr10	41444555	41444640	86	5	0.898329	0.477	0.42133	16.6903	.	-1	-1
chr9	43729582	43729671	90	4	0.883957	0.171993	0.711964	16.6786	.	-1	-1
chr1	210910661	210910991	331	4	0.276766	0.831255	-0.554488	-16.6779	.	-1	-1
chr16	50655896	50656043	148	5	0.875653	0.396028	0.479626	16.6729	.	-1	-1
chr8	2721377	2721431	55	4	0.883957	0.239959	0.643998	16.6724	.	-1	-1
chr18	15958914	15959063	150	5	0.962146	0.478828	0.483318	16.6655	.	-1	-1
chr2	115793644	115793820	177	5	0.512653	0.0747896	0.437863	16.6651	.	-1	-1
chrX	86685846	86685972	127	5	0.31264	0.783032	-0.470391	-16.6534	.	-1	-1
chr14	28480883	28480958	76	4	0.0723548	0.646519	-0.574164	-16.6338	.	-1	-1
chr10	42661667	42661732	66	4	0.308241	0.917758	-0.609517	-16.6073	.	-1	-1
chr10	122064618	122064688	71	4	0.943505	0.412384	0.53112	16.5981	.	-1	-1
chr9	18045157	18045966	810	4	0.945881	0.369282	0.576599	16.5832	.	-1	-1
chr10	67993066	67993146	81	5	0.446015	0.882797	-0.436783	-16.5699	.	-1	-1
chr13	94114900	94114956	57	4	0.964709	0.39344	0.571269	16.566	.	-1	-1
chr10	22518327	22518524	198	5	0.747357	0.277188	0.470169	16.556	.	-1	-1
chr3	84585749	84585957	209	5	0.553223	0.0977976	0.455425	16.5519	.	-1	-1
chr17	26419534	26419603	70	4	0.169491	0.84081	-0.671319	-16.5243	.	-1	-1
chrX	65412498	65412608	111	5	0.749154	0.244489	0.504665	16.5135	.	-1	-1
chrX	136685602	136685770	169	5	0.343428	0.816897	-0.47347	-16.4968	.	-1	-1
chr3	182606461	182606519	59	4	0.850127	0.208724	0.641403	16.4293	.	-1	-1
chr2	91533343	91533482	140	5	0.400706	0.84827	-0.447564	-16.4258	.	-1	-1
chr9	35762443	35762530	88	5	0.433744	0.925771	-0.492027	-16.4253	.	-1	-1
chr12	35357516	35357756	241	5	0.762061	0.199643	0.562418	16.4155	.	-1	-1
chr1	77605309	77605570	262	5	0.33577	0.816392	-0.480622	-16.4002	.	-1	-1
chr7	25815929	25815996	68	4	0.928119	0.302338	0.625781	16.3786	.	-1	-1
chr2	146613555	146613791	237	5	0.345881	0.82696	-0.481079	-16.3724	.	-1	-1
chr18	18535800	18535889	90	4	0.905304	0.210946	0.694357	16.3698	.	-1	-1
chr4	22682580	22682699	120	5	0.441804	0.919589	-0.477785	-16.3654	.	-1	-1
chr20	27778209	27778293	85	4	0.905304	0.210946	0.694357	16.3435	.	-1	-1
chrX	86772522	86772759	238	4	0.870293	0.321596	0.548697	16.3372	.	-1	-1
chr10	36018529	36018730	202	4	0.405054	0.945795	-0.540741	-16.334	.	-1	-1
chr3	159162717	159162774	58	5	0.82968	0.292792	0.536888	16.3316	.	-1	-1
chr15	26551337	26551452	116	5	0.637988	0.164905	0.473083	16.3172	.	-1	-1
chr20	27664084	27664154	71	4	0.207698	0.910633	-0.702936	-16.315	.	-1	-1
chr16	36678185	36678294	110	4	0.169491	0.834111	-0.66462	-16.3106	.	-1	-1
chr1	59922980	59923124	145	4	0.954404	0.38166	0.572744	16.2943	.	-1	-1
chr14_GL000009v2_random	96012	96090	79	5	0.138934	0.59764	-0.458706	-16.2907	.	-1	-1
chr8	24430546	24430623	78	4	0.883957	0.228993	0.654964	16.2539	.	-1	-1
chr19	8293430	8293481	52	4	0.207698	0.907372	-0.699674	-16.2461	.	-1	-1
chr16	66356198	66356396	199	4	0.867717	0.330382	0.537335	16.2445	.	-1	-1
chr13	17210937	17211001	65	4	0.905304	0.210946	0.694357	16.2333	.	-1	-1
chr6	52205696	52205828	133	5	0.344573	0.812517	-0.467944	-16.2226	.	-1	-1
chr3	177145098	177145226	129	5	0.764536	0.247979	0.516557	16.2223	.	-1	-1
chr2	221535502	221535610	109	4	0.855852	0.286213	0.56964	16.211	.	-1	-1
chr7	58970603	58970693	91	4	0.207698	0.910633	-0.702936	-16.2108	.	-1	-1
chrX	101014088	101014175	88	5	0.784315	0.253792	0.530523	16.2104	.	-1	-1
chr9	27617431	27617493	63	4	0.851208	0.260305	0.590903	16.1999	.	-1	-1
chr3	145991229	145991404	176	4	0.888865	0.352562	0.536303	16.1974	.	-1	-1
chrX	45824697	45824757	61	5	0.41391	0.812843	-0.398934	-16.1973	.	-1	-1
chr13	60693467	60693542	76	5	0.359496	0.826344	-0.466848	-16.1905	.	-1	-1
chrX	131428993	131429051	59	5	0.222064	0.666622	-0.444558	-16.1877	.	-1	-1
chr3	94588643	94588709	67	5	0.525305	0.959251	-0.433946	-16.1481	.	-1	-1
chr20	8669906	8669981	76	4	0.280037	0.907372	-0.627336	-16.1475	.	-1	-1
chr3	167149339	167149412	74	4	0.881404	0.215058	0.666347	16.1327	.	-1	-1
chr11	58566669	58566782	114	4	0.95794	0.394796	0.563144	16.109	.	-1	-1
chr4	157862430	157862480	51	5	0.14538	0.596642	-0.451263	-16.1087	.	-1	-1
chr5	40345184	40345265	82	4	0.0833915	0.65692	-0.573528	-16.0888	.	-1	-1
chrX	130836493	130836668	176	4	0.736923	0.173785	0.563139	16.067	.	-1	-1
chrX	130638847	130638943	97	5	0.779891	0.302792	0.477099	16.0489	.	-1	-1
chr5	153382151	153382209	59	5	0.729301	0.292962	0.436338	16.0478	.	-1	-1
chr3	155438652	155438858	207	4	0.620161	0.120903	0.499257	16.0301	.	-1	-1
chrX	107341548	107341659	112	4	0.128633	0.682455	-0.553822	-16.0078	.	-1	-1
chr13	18207075	18207131	57	5	0.327047	0.784129	-0.457082	-15.9963	.	-1	-1
chr6	136022934	136023297	364	4	0.270616	0.819219	-0.548603	-15.9795	.	-1	-1
chr2	53401335	53401397	63	5	0.206335	0.713433	-0.507099	-15.9747	.	-1	-1
chr13	107763210	107763300	91	4	0.618921	0.0664617	0.552459	15.9704	.	-1	-1
chr19	31833053	31833171	119	5	0.204793	0.643832	-0.439039	-15.9656	.	-1	-1
chr15	26734099	26734155	57	5	0.790625	0.33299	0.457635	15.9649	.	-1	-1
chr18	44887071	44887212	142	4	0.728603	0.156315	0.572288	15.9472	chr18	44887207	44887612
chrX	47843607	47843763	157	4	0.317305	0.869021	-0.551716	-15.9456	.	-1	-1
chr3	159424189	159424241	53	5	0.343385	0.822199	-0.478814	-15.9365	.	-1	-1
chr2	129743520	129743760	241	5	0.841403	0.371916	0.469487	15.9331	.	-1	-1
chr20	22529300	22529356	57	5	0.335437	0.873669	-0.538232	-15.931	.	-1	-1
chr9	9905139	9905192	54	5	0.656172	0.114353	0.541819	15.9301	.	-1	-1
chrX	101141716	101141817	102	5	0.333768	0.764501	-0.430732	-15.9295	.	-1	-1
chr9	95253089	95253288	200	4	0.245752	0.79075	-0.544998	-15.9186	.	-1	-1
chr20	29671986	29672049	64	5	0.587532	0.148654	0.438877	15.9168	.	-1	-1
chr2	92439451	92439535	85	4	0.232687	0.890393	-0.657706	-15.8903	.	-1	-1
chr2	87936250	87936318	69	5	0.847151	0.340704	0.506447	15.8838	.	-1	-1
chr20	2699098	2699149	52	5	0.577936	0.948609	-0.370672	-15.783	.	-1	-1
chrX	108530443	108530542	100	4	0.158567	0.730166	-0.571599	-15.781	.	-1	-1
chr8	3132076	3132142	67	5	0.852337	0.357519	0.494818	15.7687	.	-1	-1
chr9	69846223	69846294	72	5	0.289795	0.80373	-0.513935	-15.7649	.	-1	-1
chr6	23578939	23579088	150	5	0.246114	0.732777	-0.486662	-15.7494	.	-1	-1
chr1	18531503	18531656	154	5	0.687716	0.229114	0.458603	15.7227	.	-1	-1
chr16	80195885	80195957	73	4	0.312367	0.909032	-0.596665	-15.7114	.	-1	-1
chr14	20505777	20505832	56	5	0.453063	0.840818	-0.387754	-15.7057	.	-1	-1
chrX	39444946	39445005	60	5	0.893399	0.473955	0.419444	15.6951	.	-1	-1
chr2	70516820	70516876	57	5	0.521157	0.907768	-0.386611	-15.6808	.	-1	-1
chr17	12165610	12166429	820	4	0.921137	0.369031	0.552106	15.6739	.	-1	-1
chrX	101141565	101141635	71	5	0.274012	0.725373	-0.45136	-15.6655	.	-1	-1
chr10	81203270	81203333	64	5	0.531246	0.0601758	0.471071	15.664	.	-1	-1
chr16	84402389	84402533	145	4	0.671807	0.138526	0.533281	15.656	.	-1	-1
chr20	44465791	44465891	101	4	0.301827	0.932229	-0.630402	-15.6472	.	-1	-1
chr3	166389282	166389352	71	4	0.929971	0.398753	0.531219	15.6411	.	-1	-1
chr12	75808292	75808351	60	4	0.259222	0.846315	-0.587093	-15.6387	.	-1	-1
chr18	20828526	20828586	61	4	0.235828	0.890393	-0.654565	-15.6184	.	-1	-1
chr3	108765977	108766047	71	4	0.30024	0.922255	-0.622014	-15.6119	.	-1	-1
chr2	131500557	131500613	57	5	0.60105	0.948987	-0.347937	-15.6012	.	-1	-1
chr11	15718507	15718616	110	4	0.711917	0.162613	0.549303	15.5969	.	-1	-1
chr20	5262648	5262699	52	4	0.928007	0.299727	0.62828	15.5922	.	-1	-1
chr9	29276103	29276185	83	5	0.696213	0.247982	0.448231	15.5893	.	-1	-1
chr4	149710927	149711908	982	4	0.937949	0.337717	0.600232	15.5762	.	-1	-1
chr9	1338602	1338676	75	4	0.897315	0.264113	0.633202	15.5684	.	-1	-1
chr3	21575125	21575321	197	4	0.719907	0.128928	0.590979	15.563	.	-1	-1
chr22	26015331	26015531	201	4	0.688159	0.152359	0.5358	15.5453	.	-1	-1
chrX	21393886	21394651	766	4	0.458679	0.953027	-0.494348	-15.5332	.	-1	-1
chr15	29960037	29960115	79	4	0.946972	0.369013	0.57796	15.52	.	-1	-1
chr2	184952651	184952702	52	4	0.100194	0.67835	-0.578156	-15.5064	.	-1	-1
chr16	50851113	50851288	176	4	0.418339	0.921085	-0.502745	-15.5015	.	-1	-1
chr6	2363883	2363952	70	5	0.962605	0.550247	0.412359	15.494	.	-1	-1
chr2	32088955	32089194	240	4	0.435978	0.960491	-0.524513	-15.4888	.	-1	-1
chr6	91417581	91417637	57	4	0.207698	0.890393	-0.682696	-15.488	.	-1	-1
chr6	58672509	58672590	82	4	0.84207	0.171993	0.670077	15.4865	.	-1	-1
chr9	65712191	65712270	80	5	0.797047	0.323913	0.473134	15.4696	.	-1	-1
chrX	131291539	131292241	703	5	0.680836	0.198939	0.481897	15.4686	.	-1	-1
chr2	49355305	49355359	55	5	0.102326	0.605082	-0.502756	-15.4618	.	-1	-1
chr3	144250287	144250374	88	4	0.631223	0.0953426	0.53588	15.4602	.	-1	-1
chr5	22618865	22618933	69	4	0.177684	0.74656	-0.568876	-15.4599	.	-1	-1
chr5	40160329	40160419	91	4	0.789346	0.244838	0.544508	15.4536	.	-1	-1
chr8	6275704	6275779	76	5	0.357177	0.849552	-0.492375	-15.4503	.	-1	-1
chr21	26219179	26219329	151	4	0.863863	0.3449	0.518963	15.4493	.	-1	-1
chr5	147085998	147086185	188	4	0.219539	0.76888	-0.549341	-15.444	.	-1	-1
chr7	50017857	50018151	295	4	0.947698	0.408735	0.538963	15.4397	.	-1	-1
chr16	17644150	17644334	185	4	0.245678	0.812126	-0.566448	-15.4288	.	-1	-1
chr13	89789324	89789381	58	5	0.182283	0.625209	-0.442925	-15.4136	.	-1	-1
chr9	29667620	29667791	172	4	0.928953	0.396815	0.532139	15.4127	.	-1	-1
chr1	187497454	187497538	85	4	0.793889	0.24179	0.552099	15.4121	.	-1	-1
chr16	66152655	66152742	88	4	0.080004	0.646694	-0.56669	-15.4043	.	-1	-1
chr10	7300569	7300633	65	4	0.919576	0.296366	0.62321	15.3875	.	-1	-1
chr5	24765681	24765745	65	5	0.455774	0.0616197	0.394154	15.3834	.	-1	-1
chr7	59063766	59063851	86	5	0.306978	0.830861	-0.523883	-15.3794	.	-1	-1
chr3	87130771	87130900	130	4	0.355642	0.892521	-0.536879	-15.3744	.	-1	-1
chr9	75533335	75533431	97	4	0.776099	0.215992	0.560107	15.3708	.	-1	-1
chr13	63812926	63813088	163	4	0.906124	0.351353	0.554771	15.3643	.	-1	-1
chr10	94255516	94255571	56	4	0.947437	0.402502	0.544936	15.3518	.	-1	-1
chr6	67293837	67293899	63	5	0.49187	0.111309	0.380561	15.3515	.	-1	-1
chr9	21579523	21579578	56	5	0.807436	0.360311	0.447124	15.3513	.	-1	-1
chr8	9045359	9045414	56	5	0.793725	0.327231	0.466494	15.3235	.	-1	-1
chr1	51066546	51066653	108	4	0.96438	0.511712	0.452668	15.3115	.	-1	-1
chr8	21285673	21285735	63	5	0.24369	0.726571	-0.482881	-15.2856	.	-1	-1
chrX	153313292	153313352	61	4	0.207698	0.890393	-0.682696	-15.2819	.	-1	-1
chr2	52923407	52923506	100	4	0.0608999	0.599978	-0.539078	-15.2764	.	-1	-1
chr8	90409594	90409658	65	4	0.851208	0.268164	0.583044	15.2682	.	-1	-1
chr21	27310948	27311014	67	5	0.262672	0.671604	-0.408933	-15.2574	.	-1	-1
chr14	79629266	79629495	230	4	0.936185	0.349136	0.587049	15.2556	.	-1	-1
chr6	51894846	51894914	69	4	0.258243	0.846749	-0.588506	-15.2546	.	-1	-1
chr1	109681602	109681754	153	4	0.453551	0.962365	-0.508814	-15.2513	.	-1	-1
chr9	20941216	20941309	94	5	0.550041	0.0897082	0.460333	15.2411	.	-1	-1
chr7	124193363	124193617	255	4	0.455327	0.959145	-0.503817	-15.231	.	-1	-1
chrX	148586316	148587051	736	5	0.763363	0.279611	0.483752	15.2289	.	-1	-1
chr18	43297848	43298007	160	4	0.256679	0.816227	-0.559548	-15.2283	.	-1	-1
chr3	151518314	151518392	79	4	0.172533	0.770516	-0.597983	-15.218	.	-1	-1
chr22	21978504	21978580	77	4	0.535497	0.96355	-0.428053	-15.2134	.	-1	-1
chr7	74805196	74805286	91	4	0.207698	0.890393	-0.682696	-15.2118	.	-1	-1
chr11	58949233	58949300	68	4	0.277404	0.869093	-0.591689	-15.2097	.	-1	-1
chr18	28336801	28336863	63	5	0.26383	0.721722	-0.457891	-15.1895	.	-1	-1
chrX	22374314	22374402	89	4	0.892067	0.303225	0.588842	15.1743	.	-1	-1
chr11	54228536	54228633	98	4	0.207698	0.890393	-0.682696	-15.1711	.	-1	-1
chrX	107085487	107085562	76	5	0.31521	0.722164	-0.406955	-15.1558	.	-1	-1
chr8	110101478	110101561	84	4	0.0941141	0.675168	-0.581054	-15.1445	.	-1	-1
chr3	8924767	8924824	58	4	0.331221	0.922255	-0.591034	-15.1137	.	-1	-1
chr15	69995099	69995249	151	4	0.82004	0.328502	0.491538	15.1035	.	-1	-1
chr11	40939067	40939137	71	5	0.60658	0.111994	0.494585	15.0983	.	-1	-1
chr6	136198043	136198206	164	4	0.898972	0.39781	0.501162	15.0973	.	-1	-1
chrX	93587831	93587896	66	5	0.165963	0.614505	-0.448542	-15.0674	.	-1	-1
chr8	64266108	64266582	475	4	0.750047	0.192853	0.557195	15.0636	.	-1	-1
chr9	71619355	71619423	69	4	0.918815	0.322866	0.595949	15.0548	.	-1	-1
chr4	131534093	131534503	411	4	0.900146	0.368888	0.531258	15.0522	.	-1	-1
chr15	32882269	32882469	201	4	0.273527	0.869889	-0.596362	-15.0521	.	-1	-1
chr1	172059690	172060055	366	5	0.256084	0.748557	-0.492473	-15.0456	.	-1	-1
chr7	21060597	21060649	53	4	0.965711	0.392697	0.573014	15.0338	.	-1	-1
chr16	23053889	23053944	56	4	0.764994	0.158036	0.606958	15.0275	.	-1	-1
chr18	60784417	60784601	185	4	0.827791	0.253233	0.574558	15.0227	.	-1	-1
chrX	118585580	118585634	55	5	0.672462	0.227826	0.444635	15.0225	.	-1	-1
chr4	181417451	181417652	202	4	0.394814	0.916206	-0.521393	-15.0027	.	-1	-1
chr8	118745221	118745443	223	4	0.352856	0.931313	-0.578457	-14.9986	.	-1	-1
chr15	38035823	38036066	244	4	0.421868	0.931313	-0.509445	-14.9923	.	-1	-1
chr4	159852148	159852199	52	5	0.118261	0.663104	-0.544843	-14.9881	.	-1	-1
chr2	45459296	45459372	77	4	0.917576	0.351266	0.566311	14.9722	.	-1	-1
chr1	215346735	215347005	271	4	0.294593	0.848001	-0.553408	-14.9607	.	-1	-1
chr4	132352945	132353003	59	4	0.146032	0.727325	-0.581294	-14.96	.	-1	-1
chr8	1085540	1085592	53	5	0.219353	0.686417	-0.467064	-14.9586	.	-1	-1
chrX	136616278	136616353	76	5	0.346338	0.772382	-0.426044	-14.928	.	-1	-1
chr8	46937745	46937829	85	4	0.286511	0.887972	-0.601461	-14.9151	.	-1	-1
chr17	23387065	23387123	59	5	0.91643	0.379684	0.536746	14.9084	.	-1	-1
chr2	142709667	142709951	285	4	0.748114	0.221278	0.526836	14.8991	.	-1	-1
chr9	114982673	114983062	390	4	0.401716	0.956784	-0.555068	-14.8934	.	-1	-1
chrX	100703175	100703230	56	4	0.866158	0.337379	0.52878	14.8909	.	-1	-1
chr8	32938012	32938221	210	4	0.483962	0.933334	-0.449373	-14.8883	.	-1	-1
chr2	121490686	121490796	111	4	0.445157	0.956939	-0.511782	-14.8859	.	-1	-1
chr3	63516809	63516995	187	4	0.947487	0.4539	0.493587	14.8858	.	-1	-1
chr18	18219196	18219257	62	4	0.178683	0.858301	-0.679619	-14.88	.	-1	-1
chr14	25691092	25691163	72	4	0.757611	0.148504	0.609108	14.8687	.	-1	-1
chr12	29085466	29085565	100	4	0.392098	0.933082	-0.540984	-14.8661	.	-1	-1
chr8	105912734	105912814	81	5	0.93869	0.476211	0.462479	14.8642	.	-1	-1
chr16	87005522	87005603	82	4	0.91288	0.405054	0.507826	14.8548	.	-1	-1
chr20	39844566	39844618	53	4	0.284685	0.890393	-0.605709	-14.8462	.	-1	-1
chr11	30709005	30709093	89	4	0.397381	0.901844	-0.504463	-14.8424	.	-1	-1
chr3	170489475	170489616	142	4	0.491686	0.952564	-0.460878	-14.8421	.	-1	-1
chr6	96286884	96287020	137	4	0.831902	0.278714	0.553188	14.8349	.	-1	-1
chr2	178911185	178911294	110	4	0.875091	0.313385	0.561706	14.8275	.	-1	-1
chr4	51907114	51907326	213	4	0.971936	0.494395	0.477541	14.8259	.	-1	-1
chr12	35427312	35427397	86	5	0.861687	0.34993	0.511757	14.8243	.	-1	-1
chr4	39408787	39409354	568	4	0.528008	0.968218	-0.440209	-14.8239	.	-1	-1
chrX	97502783	97502849	67	5	0.806223	0.374672	0.431551	14.8235	.	-1	-1
chr21	28212130	28212230	101	4	0.145317	0.742818	-0.597501	-14.8178	.	-1	-1
chr3	75489552	75489613	62	4	0.854064	0.267423	0.586641	14.8075	.	-1	-1
chr19	20040167	20040235	69	5	0.227344	0.636886	-0.409541	-14.7885	.	-1	-1
chrX	139607840	139607932	93	4	0.809943	0.23176	0.578184	14.7822	.	-1	-1
chr15	51689701	51689757	57	4	0.936185	0.349136	0.587049	14.764	.	-1	-1
chr13	34819093	34819499	407	4	0.354956	0.853693	-0.498737	-14.745	.	-1	-1
chr10	41700958	41701037	80	4	0.883957	0.210946	0.673011	14.7405	.	-1	-1
chr16	61794296	61794346	51	4	0.716308	0.10874	0.607568	14.7405	.	-1	-1
chrX	107059472	107059573	102	4	0.184274	0.73419	-0.549915	-14.734	.	-1	-1
chr8	82489565	82489642	78	5	0.138044	0.545616	-0.407571	-14.7166	.	-1	-1
chr17	23132420	23132522	103	5	0.169491	0.721809	-0.552318	-14.7164	.	-1	-1
chr10	18408331	18408395	65	5	0.573535	0.960412	-0.386877	-14.7123	.	-1	-1
chr5	64123675	64124243	569	4	0.747857	0.226848	0.521009	14.6931	.	-1	-1
chr1	195501553	195502274	722	4	0.851574	0.297561	0.554013	14.6915	.	-1	-1
chr12	105745476	105745558	83	4	0.39019	0.957648	-0.567458	-14.6779	.	-1	-1
chr3	62229396	62229477	82	4	0.916828	0.414765	0.502063	14.6559	.	-1	-1
chr2	126177757	126177827	71	4	0.344983	0.929521	-0.584539	-14.6553	.	-1	-1
chr16	10202872	10203110	239	4	0.752426	0.194714	0.557711	14.6548	.	-1	-1
chr2	60929264	60929384	121	5	0.813677	0.2951	0.518577	14.6429	.	-1	-1
chr8	117628421	117628479	59	4	0.819775	0.236201	0.583574	14.6349	.	-1	-1
chr8	132390779	132390847	69	5	0.193508	0.666009	-0.4725	-14.6321	.	-1	-1
chr18	39710421	39710506	86	4	0.450669	0.947763	-0.497093	-14.6289	.	-1	-1
chr2	152968241	152968297	57	4	0.916447	0.305677	0.61077	14.6227	.	-1	-1
chr22	32110117	32110181	65	5	0.726414	0.289435	0.436979	14.6173	.	-1	-1
chr10	15667683	15667769	87	5	0.202088	0.76305	-0.560962	-14.6064	.	-1	-1
chr14	59936813	59937046	234	4	0.26591	0.790081	-0.524171	-14.6057	.	-1	-1
chr1	195100179	195100281	103	4	0.960458	0.481187	0.479271	14.5933	.	-1	-1
chr9	12368250	12368322	73	4	0.716308	0.104085	0.612223	14.5665	.	-1	-1
chr10	59456280	59456455	176	4	0.80862	0.272912	0.535708	14.5649	.	-1	-1
chr18	65975136	65975260	125	4	0.49263	0.937468	-0.444839	-14.5589	.	-1	-1
chr18	26218753	26219002	250	4	0.43134	0.944834	-0.513495	-14.5467	.	-1	-1
chr9_KI270719v1_random	3691	3747	57	5	0.474597	0.908485	-0.433888	-14.5323	.	-1	-1
chr6	163540486	163540540	55	4	0.415571	0.950102	-0.534531	-14.529	.	-1	-1
chr9	64829265	64829383	119	4	0.403346	0.940473	-0.537127	-14.5284	.	-1	-1
chr6	29706141	29706223	83	4	0.0874661	0.645264	-0.557798	-14.5255	.	-1	-1
chr8	45535630	45535727	98	4	0.881404	0.210946	0.670458	14.5024	.	-1	-1
chr11	3502471	3502561	91	4	0.925254	0.383526	0.541729	14.4991	.	-1	-1
chr14	19003702	19003798	97	4	0.265709	0.890393	-0.624684	-14.4972	.	-1	-1
chr2	168881440	168881670	231	4	0.478143	0.959081	-0.480938	-14.4892	.	-1	-1
chr6	35116815	35116942	128	4	0.896615	0.409295	0.48732	14.4729	.	-1	-1
chr8	76184064	76184186	123	4	0.700501	0.115799	0.584702	14.4716	.	-1	-1
chr1	33946257	33946367	111	4	0.198187	0.774643	-0.576456	-14.4664	.	-1	-1
chr20	6961642	6961708	67	4	0.145317	0.77253	-0.627213	-14.4495	.	-1	-1
chr12	36044984	36045070	87	4	0.611579	0.957588	-0.346009	-14.4492	.	-1	-1
chr15	37939047	37939107	61	4	0.170281	0.772874	-0.602593	-14.444	.	-1	-1
chrX	48039400	48039484	85	4	0.144384	0.694891	-0.550507	-14.4395	.	-1	-1
chr4	131564650	131564720	71	4	0.33992	0.887972	-0.548051	-14.435	.	-1	-1
chr6	160413185	160413272	88	4	0.104628	0.643507	-0.538879	-14.4332	.	-1	-1
chr2	20692194	20692264	71	4	0.951166	0.453221	0.497945	14.4317	.	-1	-1
chr13	16048814	16048944	131	4	0.352856	0.932122	-0.579266	-14.4233	.	-1	-1
chr7	149336104	149336173	70	4	0.387987	0.892374	-0.504387	-14.4214	.	-1	-1
chr2	79793286	79793358	73	5	0.13044	0.592522	-0.462082	-14.4184	.	-1	-1
chr1	40362771	40362927	157	4	0.88595	0.386043	0.499907	14.4074	.	-1	-1
chr1	218551355	218551456	102	4	0.545066	0.968756	-0.42369	-14.405	.	-1	-1
chr10	37469764	37469816	53	4	0.636292	0.156757	0.479535	14.4046	.	-1	-1
chr9	12874603	12874702	100	4	0.359895	0.960491	-0.600597	-14.3971	.	-1	-1
chr5	129076827	129077010	184	4	0.874722	0.374931	0.499791	14.3719	.	-1	-1
chr18	14206401	14206466	66	5	0.493922	0.946103	-0.452181	-14.3527	.	-1	-1
chr13	37492846	37493062	217	4	0.700141	0.184698	0.515443	14.3439	.	-1	-1
chr3	70082300	70082387	88	4	0.812634	0.215058	0.597577	14.3295	.	-1	-1
chr12	79079077	79079218	142	4	0.420305	0.950102	-0.529797	-14.3294	.	-1	-1
chr12	87682295	87682349	55	4	0.414107	0.939133	-0.525027	-14.3169	.	-1	-1
chr9	14880815	14880873	59	4	0.430234	0.952564	-0.52233	-14.3134	.	-1	-1
chr8	39006083	39006139	57	4	0.493115	0.96953	-0.476415	-14.3121	.	-1	-1
chr1	97167543	97167711	169	4	0.48656	0.964818	-0.478258	-14.3072	.	-1	-1
chr8	50216533	50216696	164	4	0.854064	0.320922	0.533142	14.2889	.	-1	-1
chr5	40512897	40512998	102	4	0.661645	0.0982405	0.563404	14.2823	.	-1	-1
chr6	97327108	97327176	69	4	0.851185	0.310086	0.541099	14.2742	.	-1	-1
chr9	24097271	24097370	100	4	0.588691	0.0725261	0.516164	14.2656	.	-1	-1
chr18	60174236	60174641	406	4	0.961606	0.410561	0.551045	14.2606	.	-1	-1
chr6	128280875	128280960	86	4	0.895946	0.405027	0.490919	14.2606	.	-1	-1
chr3	77226841	77226935	95	4	0.951885	0.354218	0.597667	14.2531	.	-1	-1
chr1	168055709	168055865	157	4	0.833239	0.296902	0.536337	14.2506	.	-1	-1
chr4	12566962	12567031	70	5	0.0792882	0.564086	-0.484798	-14.2489	.	-1	-1
chr12	66742329	66742399	71	4	0.7516	0.215843	0.535758	14.225	.	-1	-1
chr4	108449485	108449557	73	4	0.947035	0.418302	0.528733	14.2179	.	-1	-1
chr20	22387919	22388136	218	4	0.950503	0.419281	0.531222	14.217	.	-1	-1
chr5	20813274	20813330	57	4	0.151318	0.682549	-0.531231	-14.212	.	-1	-1
chr20	37759789	37759923	135	4	0.725178	0.19544	0.529738	14.2057	.	-1	-1
chr3	198061022	198061106	85	4	0.39019	0.954002	-0.563812	-14.2047	.	-1	-1
chr2	150383101	150383153	53	4	0.2916	0.803535	-0.511935	-14.2045	.	-1	-1
chr3	197565934	197566029	96	4	0.334853	0.905845	-0.570992	-14.1865	.	-1	-1
chr5	89491257	89491384	128	4	0.27799	0.814085	-0.536095	-14.181	.	-1	-1
chr3	154370422	154370503	82	4	0.359895	0.956804	-0.596909	-14.1738	.	-1	-1
chr7	118732775	118732836	62	4	0.754073	0.224958	0.529116	14.1652	.	-1	-1
chr2	93401374	93401550	177	4	0.272348	0.890393	-0.618045	-14.1641	.	-1	-1
chr4	91281548	91281608	61	4	0.268673	0.856994	-0.588322	-14.1635	.	-1	-1
chrX	47861092	47861289	198	4	0.234898	0.796603	-0.561705	-14.1442	.	-1	-1
chr8	69714598	69714671	74	4	0.407313	0.850002	-0.442689	-14.1365	.	-1	-1
chr10	49985852	49985929	78	4	0.470128	0.960048	-0.48992	-14.1359	.	-1	-1
chr6	45787460	45787609	150	4	0.545951	0.950318	-0.404366	-14.1113	.	-1	-1
chr1	143473033	143473100	68	4	0.29738	0.906671	-0.609291	-14.1076	.	-1	-1
chr18	45569750	45569829	80	4	0.186193	0.750091	-0.563898	-14.0915	.	-1	-1
chr4	149721265	149721441	177	4	0.82159	0.306369	0.515222	14.0795	.	-1	-1
chr20	29911175	29911225	51	4	0.421307	0.946435	-0.525128	-14.0569	.	-1	-1
chr9	22373760	22373924	165	4	0.787594	0.231935	0.555658	14.0563	.	-1	-1
chr3	96099776	96099866	91	4	0.96068	0.424108	0.536572	14.0492	.	-1	-1
chr3	31055837	31055904	68	4	0.779666	0.21614	0.563525	14.0491	.	-1	-1
chr5	110410315	110410679	365	4	0.615052	0.121722	0.49333	14.0356	.	-1	-1
chr2	157033259	157033350	92	4	0.381628	0.909523	-0.527895	-14.0328	.	-1	-1
chr5	84053221	84053557	337	4	0.444138	0.903622	-0.459484	-13.9998	.	-1	-1
chr18	40447633	40447691	59	4	0.677282	0.128928	0.548354	13.9811	.	-1	-1
chr1	80948244	80948301	58	4	0.764994	0.149648	0.615346	13.971	.	-1	-1
chr1	123989203	123989269	67	4	0.359245	0.808732	-0.449487	-13.959	.	-1	-1
chr11	58995868	58995932	65	4	0.340301	0.870322	-0.530021	-13.95	.	-1	-1
chr1	222611297	222611508	212	4	0.964545	0.518025	0.44652	13.9445	.	-1	-1
chr11	7918286	7918337	52	4	0.814625	0.215645	0.59898	13.9151	.	-1	-1
chr9	27933720	27933778	59	5	0.774041	0.330043	0.443998	13.9137	.	-1	-1
chr11	63338506	63338710	205	4	0.801238	0.269118	0.53212	13.9088	.	-1	-1
chr19	173139	173223	85	5	0.240183	0.789818	-0.549635	-13.9017	.	-1	-1
chr2	220815468	220815537	70	4	0.88862	0.381589	0.507031	13.8994	.	-1	-1
chr3	198163424	198163563	140	4	0.941592	0.413979	0.527613	13.899	.	-1	-1
chr5	169242686	169242766	81	4	0.702998	0.130656	0.572341	13.8968	.	-1	-1
chrX	91532550	91532701	152	4	0.60227	0.0815657	0.520705	13.8789	.	-1	-1
chr4	12261670	12262511	842	4	0.72103	0.218933	0.502097	13.8135	.	-1	-1
chr2	195903295	195903486	192	4	0.769731	0.240929	0.528802	13.8071	.	-1	-1
chr6	18392589	18392660	72	4	0.395525	0.928187	-0.532662	-13.8049	.	-1	-1
chr18	2415768	2415852	85	4	0.705886	0.175595	0.530291	13.8032	.	-1	-1
chr4	96175066	96175159	94	4	0.943412	0.459295	0.484118	13.7965	.	-1	-1
chr3	167519154	167519342	189	4	0.876729	0.391971	0.484758	13.794	.	-1	-1
chr6	104076428	104076539	112	4	0.92368	0.434373	0.489307	13.7884	.	-1	-1
chr2	112506559	112506653	95	4	0.469319	0.937222	-0.467903	-13.7697	.	-1	-1
chr7	107200260	107200345	86	4	0.926925	0.442162	0.484763	13.7647	.	-1	-1
chr2	173048949	173049121	173	4	0.613009	0.129067	0.483942	13.7597	.	-1	-1
chrX	63372515	63372632	118	4	0.423125	0.87122	-0.448095	-13.7515	.	-1	-1
chr20	33846038	33846103	66	4	0.75264	0.197044	0.555596	13.748	.	-1	-1
chr20	409718	409801	84	4	0.442786	0.918859	-0.476073	-13.7389	.	-1	-1
chr20	36147072	36147177	106	4	0.47995	0.956403	-0.476453	-13.7333	.	-1	-1
chr3	176443091	176443197	107	4	0.476042	0.957058	-0.481016	-13.7224	.	-1	-1
chr4	105602279	105602406	128	4	0.725541	0.24852	0.477021	13.7173	.	-1	-1
chr9	23114801	23114851	51	5	0.749873	0.251658	0.498215	13.7061	.	-1	-1
chr3	123660416	123660503	88	4	0.755278	0.175093	0.580184	13.7014	.	-1	-1
chr5	89438247	89438399	153	4	0.477921	0.935875	-0.457953	-13.6909	.	-1	-1
chr2	221065654	221065840	187	4	0.317302	0.828437	-0.511135	-13.681	.	-1	-1
chr3	98626874	98627019	146	4	0.927151	0.404626	0.522524	13.681	.	-1	-1
chr6	47918496	47918608	113	4	0.282844	0.815675	-0.532831	-13.6803	.	-1	-1
chr12	38886763	38886960	198	4	0.958543	0.482183	0.47636	13.6786	.	-1	-1
chr15	30713319	30713419	101	4	0.268142	0.909032	-0.64089	-13.6549	.	-1	-1
chrX	14826632	14826683	52	4	0.907651	0.475564	0.432087	13.6482	.	-1	-1
chr3	128596876	128596930	55	4	0.359895	0.950482	-0.590587	-13.6436	.	-1	-1
chr5	148344702	148344811	110	4	0.525135	0.0816734	0.443461	13.6353	.	-1	-1
chr7	120131141	120131199	59	4	0.618434	0.0815657	0.536868	13.6281	.	-1	-1
chr2	147732105	147732204	100	4	0.114255	0.635645	-0.52139	-13.6255	.	-1	-1
chr8	61879571	61879737	167	4	0.9547	0.485314	0.469387	13.6134	.	-1	-1
chr12	27966946	27967122	177	4	0.884158	0.393575	0.490583	13.5952	.	-1	-1
chr11	121479590	121479717	128	4	0.799423	0.345054	0.45437	13.5891	.	-1	-1
chr18	61364531	61364592	62	4	0.506323	0.921531	-0.415209	-13.581	.	-1	-1
chr21	27121848	27121927	80	4	0.312667	0.815848	-0.503181	-13.567	.	-1	-1
chr15	57347003	57347065	63	4	0.879113	0.415377	0.463736	13.565	.	-1	-1
chrX	55309464	55309516	53	4	0.916447	0.407535	0.508912	13.5576	.	-1	-1
chr3	144806567	144806645	79	4	0.810344	0.355357	0.454987	13.5514	.	-1	-1
chr12	19664733	19664914	182	4	0.938851	0.488055	0.450796	13.5482	.	-1	-1
chrX	50889256	50889319	64	4	0.936185	0.466858	0.469327	13.5426	.	-1	-1
chr12	84564840	84565064	225	4	0.87515	0.391944	0.483206	13.5408	.	-1	-1
chr10	17946680	17946887	208	4	0.627816	0.165003	0.462814	13.5238	.	-1	-1
chrX	100978463	100978521	59	4	0.889467	0.424254	0.465213	13.5205	.	-1	-1
chr15	64522728	64522926	199	4	0.756018	0.272351	0.483667	13.5177	.	-1	-1
chr4	167808309	167808375	67	4	0.658537	0.0692069	0.589331	13.4802	.	-1	-1
chr20	18765880	18765952	73	4	0.475739	0.964985	-0.489246	-13.4762	.	-1	-1
chr4	84361780	84361853	74	4	0.490046	0.915808	-0.425762	-13.4529	.	-1	-1
chr8	129698096	129698249	154	4	0.722471	0.224176	0.498295	13.4363	.	-1	-1
chr20	24107856	24107932	77	4	0.353444	0.939853	-0.586409	-13.4211	.	-1	-1
chr11	12770202	12770286	85	4	0.72984	0.193167	0.536673	13.4191	.	-1	-1
chr2	130019363	130019582	220	4	0.903576	0.359052	0.544525	13.4147	.	-1	-1
chr4	15447867	15448092	226	4	0.495927	0.948317	-0.452391	-13.4141	.	-1	-1
chr2	196941824	196941965	142	4	0.733337	0.202974	0.530363	13.3956	.	-1	-1
chrX	21842789	21842855	67	4	0.497994	0.899363	-0.40137	-13.3955	.	-1	-1
chr3	385752	385814	63	4	0.661828	0.112926	0.548902	13.3925	.	-1	-1
chr18	18897018	18897079	62	4	0.942801	0.417285	0.525516	13.3921	.	-1	-1
chr8	32703828	32703911	84	4	0.308241	0.887972	-0.57973	-13.3911	.	-1	-1
chr9	31798242	31798292	51	4	0.716308	0.114579	0.601729	13.3852	.	-1	-1
chr10	67220091	67220269	179	4	0.819791	0.331862	0.487929	13.3852	.	-1	-1
chr1	200818894	200818950	57	4	0.427595	0.933017	-0.505422	-13.3806	.	-1	-1
chr4	151495869	151496001	133	4	0.718349	0.188753	0.529596	13.3693	.	-1	-1
chr7	123193185	123193493	309	4	0.816057	0.32381	0.492247	13.3667	.	-1	-1
chr11	16476620	16476846	227	4	0.550315	0.972772	-0.422457	-13.3606	.	-1	-1
chr4	38302949	38303041	93	4	0.423143	0.92972	-0.506577	-13.3571	.	-1	-1
chr10	35707918	35708051	134	4	0.080004	0.566839	-0.486835	-13.3515	.	-1	-1
chr2	33636531	33636648	118	4	0.938683	0.485199	0.453484	13.3509	.	-1	-1
chr1	219574614	219574686	73	4	0.7558	0.225186	0.530615	13.3406	chr1	219574564	219575000
chr1	186896174	186896237	64	4	0.899345	0.415276	0.48407	13.3373	.	-1	-1
chr1	110844527	110844631	105	4	0.150771	0.661933	-0.511162	-13.323	.	-1	-1
chr18	17734340	17734429	90	4	0.458356	0.945863	-0.487507	-13.3212	.	-1	-1
chr10	129196079	129196289	211	4	0.159186	0.633556	-0.47437	-13.3148	.	-1	-1
chr13	50202424	50202495	72	4	0.938076	0.423541	0.514535	13.3122	.	-1	-1
chr9	76621159	76621220	62	4	0.936841	0.356653	0.580188	13.309	.	-1	-1
chr9	114912040	114912096	57	4	0.795482	0.274835	0.520647	13.2945	.	-1	-1
chr2	205851758	205851851	94	4	0.244031	0.764568	-0.520537	-13.2896	.	-1	-1
chr5	89904800	89904925	126	4	0.23121	0.764061	-0.532851	-13.2877	.	-1	-1
chr4	175268814	175268885	72	4	0.352856	0.909032	-0.556176	-13.2853	.	-1	-1
chr5	38801300	38801421	122	4	0.737612	0.263896	0.473717	13.2835	.	-1	-1
chrX	53530748	53530990	243	4	0.315045	0.760513	-0.445468	-13.279	.	-1	-1
chr10	39911232	39911350	119	4	0.113056	0.665406	-0.55235	-13.2639	.	-1	-1
chr3	7143780	7143989	210	4	0.519483	0.123529	0.395953	13.2556	.	-1	-1
chr5	57760139	57760196	58	4	0.256632	0.745953	-0.489321	-13.2515	.	-1	-1
chr10	47006443	47006555	113	4	0.365314	0.851446	-0.486132	-13.2368	.	-1	-1
chr7	15246183	15246244	62	4	0.223006	0.741167	-0.518161	-13.2248	.	-1	-1
chr13	105809765	105809819	55	4	0.805905	0.34765	0.458255	13.1974	.	-1	-1
chrX	38417541	38417624	84	4	0.506707	0.959366	-0.452659	-13.1903	.	-1	-1
chr4	142892304	142892423	120	4	0.260033	0.783923	-0.52389	-13.1873	.	-1	-1
chr8	38393936	38394126	191	4	0.474497	0.928414	-0.453917	-13.1845	.	-1	-1
chr10	64546083	64546268	186	4	0.885336	0.436119	0.449217	13.1819	.	-1	-1
chr18	60330533	60330603	71	4	0.433802	0.898694	-0.464892	-13.1507	.	-1	-1
chr15	49585680	49585749	70	4	0.754457	0.281993	0.472464	13.1502	.	-1	-1
chr12	129400867	129400959	93	4	0.61083	0.064618	0.546212	13.1311	.	-1	-1
chr8	67635139	67635270	132	4	0.427287	0.897584	-0.470297	-13.1162	.	-1	-1
chr15	56687786	56687845	60	4	0.903613	0.347114	0.556498	13.1161	.	-1	-1
chr6	48334553	48334608	56	4	0.667064	0.149867	0.517197	13.1141	.	-1	-1
chr3	160948378	160948456	79	4	0.458842	0.940443	-0.481601	-13.1077	.	-1	-1
chr4	64437784	64437915	132	4	0.535786	0.952087	-0.416301	-13.1052	.	-1	-1
chr18	41015856	41016014	159	4	0.762347	0.320617	0.44173	13.104	.	-1	-1
chr11	112872410	112872505	96	4	0.44109	0.952206	-0.511115	-13.1011	.	-1	-1
chr2	41214572	41214639	68	4	0.72135	0.128928	0.592423	13.0967	.	-1	-1
chr5	130679221	130679538	318	4	0.535767	0.971261	-0.435493	-13.0918	.	-1	-1
chr10	58572819	58572885	67	4	0.50099	0.945935	-0.444945	-13.0828	.	-1	-1
chr4	152498356	152498569	214	4	0.760044	0.272905	0.487139	13.0826	.	-1	-1
chr13	56019331	56019447	117	4	0.310989	0.816128	-0.505139	-13.0813	.	-1	-1
chr13	81780972	81781061	90	4	0.764849	0.193167	0.571682	13.0787	.	-1	-1
chr2	134630400	134630469	70	4	0.913558	0.414591	0.498967	13.0737	.	-1	-1
chr4	85074601	85074701	101	4	0.936185	0.392152	0.544033	13.0702	.	-1	-1
chrX	142718086	142718182	97	4	0.807355	0.29989	0.507465	13.0501	.	-1	-1
chr11	11197086	11197263	178	4	0.353385	0.82326	-0.469876	-13.041	.	-1	-1
chr5	62029910	62029973	64	4	0.159226	0.729812	-0.570586	-13.0371	.	-1	-1
chr2	108018840	108019046	207	4	0.230305	0.696864	-0.46656	-13.0023	.	-1	-1
chr9	84274728	84274779	52	4	0.145317	0.729812	-0.584495	-12.987	.	-1	-1
chr6	96871339	96871427	89	4	0.79621	0.310156	0.486054	12.9807	.	-1	-1
chr14	79426242	79426343	102	4	0.935423	0.399361	0.536062	12.9724	.	-1	-1
chrX	12460184	12460239	56	4	0.816123	0.314199	0.501924	12.9698	.	-1	-1
chr15	94229050	94229102	53	4	0.250127	0.72952	-0.479393	-12.9575	.	-1	-1
chr1	242237381	242237609	229	4	0.810099	0.362037	0.448062	12.9517	.	-1	-1
chr8	56339443	56339549	107	4	0.469544	0.962365	-0.492821	-12.9506	.	-1	-1
chr1	105434051	105434143	93	4	0.198091	0.686169	-0.488078	-12.9387	.	-1	-1
chr6	67750862	67751093	232	4	0.915021	0.494412	0.420609	12.9386	.	-1	-1
chr20	7942065	7942165	101	4	0.76107	0.175093	0.585977	12.9374	.	-1	-1
chr2	186327800	186328115	316	4	0.945027	0.405471	0.539556	12.9373	.	-1	-1
chr1	115121386	115121587	202	4	0.452306	0.90707	-0.454764	-12.9308	.	-1	-1
chr9	43927591	43927689	99	4	0.883957	0.298214	0.585743	12.928	.	-1	-1
chrX	11610774	11610958	185	4	0.802146	0.328571	0.473575	12.9254	.	-1	-1
chr18	45314863	45314999	137	4	0.897107	0.470051	0.427056	12.9225	.	-1	-1
chr6	23438382	23438462	81	4	0.658537	0.0898631	0.568674	12.9179	.	-1	-1
chr6	46527711	46527774	64	4	0.797294	0.264556	0.532738	12.9167	.	-1	-1
chr20	54593174	54593244	71	4	0.644742	0.128928	0.515814	12.9108	.	-1	-1
chr13	56259901	56259951	51	4	0.193605	0.694205	-0.5006	-12.896	.	-1	-1
chr2	126179126	126179190	65	4	0.172533	0.735275	-0.562742	-12.8845	.	-1	-1
chrX	86042408	86042536	129	4	0.786674	0.266692	0.519982	12.8829	.	-1	-1
chr18	22548202	22548262	61	4	0.779001	0.319264	0.459737	12.882	.	-1	-1
chr4	169530182	169530280	99	4	0.947881	0.476563	0.471319	12.876	.	-1	-1
chr3	189002548	189002674	127	4	0.485008	0.944963	-0.459955	-12.8723	.	-1	-1
chr1	204001429	204001490	62	4	0.258808	0.824386	-0.565577	-12.8698	.	-1	-1
chr8	8063976	8064041	66	4	0.92442	0.356653	0.567767	12.8496	.	-1	-1
chr9	28115087	28115163	77	4	0.612476	0.0974887	0.514987	12.8437	.	-1	-1
chr14	79142993	79143067	75	4	0.39019	0.922255	-0.532065	-12.8251	.	-1	-1
chr5	27621256	27621322	67	4	0.207698	0.786834	-0.579136	-12.8189	.	-1	-1
chrX	96583228	96583341	114	4	0.341241	0.856994	-0.515753	-12.817	.	-1	-1
chr1	96009176	96009378	203	4	0.18273	0.680217	-0.497488	-12.8151	.	-1	-1
chr20	35586666	35586793	128	4	0.470628	0.950482	-0.479854	-12.7985	.	-1	-1
chr18	48515765	48515839	75	4	0.469685	0.962768	-0.493083	-12.7943	.	-1	-1
chr13	16966739	16966836	98	4	0.440739	0.923242	-0.482503	-12.7796	.	-1	-1
chr2	97614532	97614596	65	4	0.396829	0.931313	-0.534484	-12.7791	.	-1	-1
chr4	60638015	60638114	100	4	0.65274	0.104085	0.548656	12.7737	.	-1	-1
chrX	6300374	6300436	63	4	0.531825	0.0851097	0.446715	12.7634	.	-1	-1
chr13	82274845	82274919	75	4	0.214471	0.716468	-0.501998	-12.7523	.	-1	-1
chr13	32085233	32085472	240	4	0.265269	0.788199	-0.52293	-12.7523	.	-1	-1
chr11	78381893	78382014	122	4	0.390832	0.868624	-0.477791	-12.7447	.	-1	-1
chr15	54238368	54238418	51	4	0.388795	0.872788	-0.483994	-12.7246	.	-1	-1
chr20	35854658	35854777	120	4	0.605894	0.952934	-0.34704	-12.6953	.	-1	-1
chr4	101279494	101279573	80	4	0.61557	0.137939	0.47763	12.6494	.	-1	-1
chr6	106735538	106735633	96	4	0.586535	0.080297	0.506238	12.647	.	-1	-1
chr2	184138439	184138496	58	4	0.209153	0.717405	-0.508252	-12.6116	.	-1	-1
chr8	25659023	25659240	218	4	0.342067	0.800549	-0.458482	-12.6083	.	-1	-1
chr16	56475456	56475527	72	4	0.74834	0.210946	0.537393	12.6078	.	-1	-1
chr13	70306316	70306412	97	4	0.883957	0.351416	0.532541	12.5972	.	-1	-1
chrX	139921927	139922077	151	4	0.761162	0.307488	0.453675	12.5879	.	-1	-1
chr20	23454531	23454588	58	4	0.549001	0.93915	-0.390149	-12.5805	.	-1	-1
chr17	24784075	24784132	58	4	0.885181	0.319721	0.565459	12.569	.	-1	-1
chr10	112136673	112136739	67	4	0.463163	0.857817	-0.394654	-12.5684	.	-1	-1
chr5	129313380	129313454	75	4	0.285451	0.705474	-0.420024	-12.5633	.	-1	-1
chr8	127181528	127181582	55	4	0.189941	0.665435	-0.475494	-12.5491	.	-1	-1
chr13	37428322	37428373	52	4	0.0629296	0.521192	-0.458263	-12.5017	.	-1	-1
chr12	28817054	28817158	105	4	0.335924	0.806282	-0.470358	-12.4841	.	-1	-1
chr20	43770894	43770982	89	4	0.428517	0.92972	-0.501204	-12.4712	.	-1	-1
chr15	52941748	52941840	93	4	0.91991	0.517924	0.401985	12.4696	.	-1	-1
chr3	182056012	182056127	116	4	0.491942	0.943822	-0.451879	-12.4664	.	-1	-1
chr1	179552553	179552605	53	4	0.451976	0.924809	-0.472834	-12.4477	.	-1	-1
chr13	16308320	16308428	109	4	0.751354	0.314633	0.436722	12.4245	.	-1	-1
chrX	52417350	52417451	102	4	0.666973	0.234243	0.43273	12.4099	.	-1	-1
chr15	37259215	37260772	1558	4	0.145788	0.668963	-0.523176	-12.373	.	-1	-1
chr14	27405131	27405181	51	4	0.661049	0.208235	0.452814	12.3615	.	-1	-1
chr4	21161255	21161321	67	4	0.369855	0.890393	-0.520538	-12.3404	.	-1	-1
chr14	57637908	57638016	109	4	0.857513	0.409784	0.447729	12.3272	.	-1	-1
chr14	44816708	44816824	117	4	0.773111	0.288226	0.484885	12.3231	.	-1	-1
chr2	18132245	18132377	133	4	0.452843	0.880488	-0.427645	-12.3219	.	-1	-1
chrX	150406046	150406194	149	4	0.441843	0.901739	-0.459897	-12.3152	.	-1	-1
chr2	214347542	214347646	105	4	0.697065	0.188973	0.508093	12.2791	.	-1	-1
chrX	140749258	140749386	129	4	0.352856	0.868032	-0.515175	-12.2535	.	-1	-1
chr6	59771027	59771107	81	4	0.841444	0.291282	0.550163	12.2188	.	-1	-1
chr3	433049	433140	92	4	0.152606	0.595068	-0.442463	-12.215	.	-1	-1
chr18	45512351	45512445	95	4	0.834146	0.324821	0.509326	12.2131	.	-1	-1
chr13	16922641	16922756	116	4	0.721901	0.171993	0.549908	12.2079	.	-1	-1
chr18	17710760	17710849	90	4	0.396829	0.923427	-0.526597	-12.1965	.	-1	-1
chr4	67343692	67344300	609	5	0.362503	0.711345	-0.348842	-12.1929	.	-1	-1
chr8	74250843	74251035	193	4	0.819775	0.318037	0.501738	12.1813	.	-1	-1
chr13	104289454	104289544	91	4	0.636689	0.19323	0.443459	12.1047	.	-1	-1
chr9	80136218	80136269	52	4	0.885338	0.397853	0.487485	12.0951	.	-1	-1
chr12	116285897	116285947	51	4	0.350098	0.835165	-0.485066	-11.9089	.	-1	-1
chr16	60640180	60640285	106	4	0.163271	0.605048	-0.441777	-11.8958	.	-1	-1
chrX	84132189	84132254	66	4	0.333063	0.830861	-0.497798	-11.881	.	-1	-1
chrX	42418925	42419016	92	4	0.187328	0.725973	-0.538645	-11.8016	.	-1	-1
chr1	241548929	241548988	60	4	0.403193	0.910633	-0.507441	-11.7266	.	-1	-1
chr1	212488657	212488715	59	4	0.780076	0.297619	0.482456	11.7236	.	-1	-1
chr2	184682013	184682098	86	4	0.619281	0.204922	0.414359	11.7189	.	-1	-1
chr15	18221268	18221320	53	4	0.905304	0.356653	0.54865	11.6906	.	-1	-1
chr6	65308066	65308133	68	4	0.892067	0.397853	0.494214	11.627	.	-1	-1
chr20	40830150	40830239	90	4	0.411386	0.884097	-0.472711	-11.4226	.	-1	-1
chr17	24916380	24916437	58	4	0.169491	0.725973	-0.556482	-11.4168	.	-1	-1
chr6	104491258	104491324	67	4	0.169491	0.725973	-0.556482	-11.4168	.	-1	-1
chr14	29478248	29478603	356	4	0.421341	0.916229	-0.494888	-11.3131	.	-1	-1
chr4	151531446	151531538	93	4	0.936615	0.452906	0.483709	11.2359	.	-1	-1
chrX	77429580	77430042	463	6	0.537784	0.778267	-0.240483	-10.945	.	-1	-1
chrX	46191344	46191724	381	8	0.550559	0.331845	0.218714	10.903	.	-1	-1
chr2	154385667	154386154	488	5	0.766198	0.375265	0.390933	10.8994	.	-1	-1
chr11	103615473	103616062	590	7	0.438038	0.226918	0.21112	10.0452	.	-1	-1
chr8	57473976	57474397	422	5	0.854116	0.542582	0.311534	9.65238	.	-1	-1
chr13	57333145	57333804	660	5	0.567385	0.218992	0.348392	9.20379	.	-1	-1
chr13	89617365	89618272	908	7	0.603052	0.512636	0.0904163	8.76727	.	-1	-1
chr2	62663036	62664938	1903	6	0.629725	0.409775	0.21995	7.50937	.	-1	-1
chr7	12502491	12502796	306	4	0.626618	0.846909	-0.22029	-7.21643	.	-1	-1
chr1	121074134	121075052	919	4	0.554487	0.740098	-0.185611	-6.06438	.	-1	-1
chr2	185119904	185120199	296	4	0.343442	0.614042	-0.2706	-6.05214	.	-1	-1
chr9	22856900	22857285	386	4	0.551136	0.743911	-0.192775	-5.82439	.	-1	-1
chr10	20553278	20554380	1103	6	0.578294	0.677452	-0.0991572	-5.28226	.	-1	-1
chr9	28213851	28214425	575	4	0.580777	0.310137	0.27064	4.66332	.	-1	-1
chr2	152609037	152609327	291	4	0.59055	0.667409	-0.0768585	-4.57901	.	-1	-1
chr2	158394855	158395267	413	4	0.659589	0.681852	-0.0222628	-3.61595	.	-1	-1
chr20	23196558	23196872	315	4	0.589395	0.689765	-0.10037	-3.02803	.	-1	-1
chr3	59607102	59607900	799	5	0.467941	0.443103	0.024838	2.62524	.	-1	-1
chr4	144006643	144007004	362	4	0.541662	0.537177	0.00448482	-2.43072	.	-1	-1
chr1	105652387	105652739	353	4	0.44074	0.415057	0.0256825	2.19699	.	-1	-1
chrX	65404794	65405102	309	4	0.298265	0.348171	-0.0499057	-1.91563	.	-1	-1
chr6	9848261	9849095	835	4	0.364769	0.34586	0.0189086	1.88756	.	-1	-1
chrX	66359449	66360502	1054	5	0.489114	0.419041	0.0700723	1.704	.	-1	-1
chrX	64264027	64264527	501	4	0.612677	0.610956	0.00172071	1.47162	.	-1	-1
chr14	19826131	19826847	717	4	0.611503	0.599438	0.0120649	-1.47089	.	-1	-1
chr3	15181190	15181775	586	4	0.628203	0.627074	0.00112874	1.3078	.	-1	-1
chr12	46414081	46414648	568	4	0.717101	0.671837	0.0452649	1.18302	.	-1	-1
chr9	79138445	79138788	344	4	0.671031	0.689993	-0.0189622	0.973676	.	-1	-1
chrX	14327530	14328075	546	4	0.388456	0.395931	-0.00747472	-0.9396	.	-1	-1
chr15	46945600	46946192	593	4	0.593526	0.527482	0.0660442	0.792115	.	-1	-1
chr13	84513662	84514175	514	4	0.446217	0.52188	-0.0756628	-0.768644	.	-1	-1
chr7	120095046	120095520	475	4	0.605498	0.598412	0.00708581	-0.697715	.	-1	-1
chr2	153918310	153919564	1255	4	0.680888	0.736398	-0.0555091	-0.440244	.	-1	-1
chr8	58953946	58954326	381	4	0.426805	0.406707	0.0200977	0.427231	.	-1	-1
chr3	62456912	62457467	556	4	0.492079	0.37055	0.121529	0.266889	.	-1	-1
chrX	54746533	54746818	286	4	0.584243	0.613398	-0.0291543	-0.209629	.	-1	-1
chr4	83275376	83275735	360	4	0.495018	0.520775	-0.0257574	-0.147568	.	-1	-1

## Sheet: DMR.TNF12d.vs.0h.TET2_KO
chr	start	end	length	nCG	meanMethy1	meanMethy2	diff.Methy	areaStat	p65_peak_chr	p65_peak_start	p65_peak_end
chr21	8440387	8440982	596	175	0.711273	0.255438	0.455835	701.27	.	-1	-1
chrUn_GL000220v1	150913	151260	348	104	0.590515	0.139321	0.451194	401.078	.	-1	-1
chr21	8209368	8211429	2062	99	0.706598	0.266223	0.440375	332.657	.	-1	-1
chr21	8395156	8395495	340	78	0.637907	0.184557	0.45335	309.866	.	-1	-1
chr9	136902352	136902992	641	36	0.884888	0.190154	0.694734	267.83	chr9	136902460	136902730
chrUn_GL000220v1	105958	106259	302	45	0.181216	0.828542	-0.647325	-253.284	.	-1	-1
chr9	61869102	61869396	295	50	0.67992	0.13275	0.54717	238.281	.	-1	-1
chr6	519637	519963	327	58	0.908266	0.439939	0.468327	225.723	.	-1	-1
chr4	112073053	112073695	643	18	0.852049	0.0916766	0.760372	159.132	chr4	112073317	112073641
chr21	8402022	8402140	119	44	0.807467	0.381263	0.426203	149.576	.	-1	-1
chr4	78252608	78253237	630	24	0.876438	0.252681	0.623758	147.798	chr4	78252804	78253125
chr6	32861219	32861742	524	32	0.71914	0.200843	0.518297	143.265	chr6	32861214	32861467
chr9	38318923	38319461	539	24	0.822197	0.217632	0.604565	135.558	chr9	38319117	38319324
chr1	111192793	111193369	577	20	0.81189	0.154979	0.656911	131.006	chr1	111192793	111193253
chr5	151086919	151087437	519	23	0.890519	0.280648	0.609872	127.496	chr5	151087099	151087350
chr6	137873330	137873729	400	14	0.860612	0.0907672	0.769845	127.191	chr6	137873388	137873687
chrX	155458543	155458756	214	33	0.425235	0.864859	-0.439624	-125.602	.	-1	-1
chr22	38218606	38218997	392	32	0.874378	0.391172	0.483206	119.546	chr22	38218635	38218905
chr15	70140583	70141002	420	18	0.871956	0.187867	0.684089	118.231	chr15	70140592	70141033
chr9	123996612	123996992	381	30	0.879273	0.404169	0.475103	116.621	chr9	123996705	123996927
chr3	72973044	72973929	886	16	0.856343	0.150564	0.705779	110.775	chr3	72973106	72973595
chr12	75706149	75706459	311	14	0.912715	0.205367	0.707347	110.527	chr12	75706082	75706362
chr4	90681430	90681602	173	17	0.170154	0.911521	-0.741367	-107.404	.	-1	-1
chr3	10191958	10192526	569	19	0.781897	0.169844	0.612053	105.615	chr3	10192166	10192419
chr19	28589889	28590342	454	24	0.766783	0.239329	0.527453	101.57	chr19	28590025	28590385
chr6	30882390	30882942	553	20	0.785568	0.225297	0.560271	100.675	chr6	30882475	30882965
chr18	20560312	20560764	453	19	0.207059	0.874853	-0.667794	-99.6106	.	-1	-1
chr17	81423253	81423567	315	26	0.882702	0.46412	0.418582	94.8349	.	-1	-1
chr1	193408836	193409243	408	18	0.823736	0.240743	0.582993	93.8253	chr1	193408846	193409061
chr2	222423487	222423919	433	21	0.60687	0.116239	0.490632	92.9925	chr2	222423615	222424046
chr19	49897703	49898096	394	26	0.840715	0.393269	0.447447	91.512	chr19	49897640	49898019
chr8	37566744	37567254	511	21	0.839336	0.338752	0.500584	88.6073	chr8	37566801	37567092
chr14	75540230	75540533	304	18	0.872053	0.33025	0.541804	88.5939	chr14	75540126	75540463
chr1	37476857	37477708	852	21	0.830148	0.334995	0.495153	84.9654	.	-1	-1
chr9	21832005	21832588	584	15	0.862022	0.288025	0.573996	83.8153	.	-1	-1
chr22	40746386	40746614	229	13	0.105457	0.823808	-0.718351	-82.9827	.	-1	-1
chr15	19328564	19329060	497	14	0.186053	0.927013	-0.74096	-82.1141	.	-1	-1
chr21	8429302	8429482	181	23	0.865046	0.362058	0.502988	81.9249	.	-1	-1
chr1	7940803	7941073	271	16	0.799303	0.22978	0.569523	81.3224	chr1	7940809	7941056
chrX	115731409	115731696	288	21	0.736644	0.207882	0.528762	79.3687	.	-1	-1
chr5	562408	562475	68	20	0.910124	0.474361	0.435763	78.4958	.	-1	-1
chr12	26272037	26272279	243	22	0.910391	0.413243	0.497148	76.6222	.	-1	-1
chr17	77882557	77882981	425	20	0.804504	0.281311	0.523194	76.054	.	-1	-1
chr1	27921374	27921526	153	17	0.273776	0.869186	-0.595409	-75.9326	.	-1	-1
chrUn_GL000220v1	157342	157504	163	20	0.7016	0.244744	0.456856	73.7317	.	-1	-1
chr4	158799961	158800352	392	16	0.857614	0.296702	0.560912	72.0159	.	-1	-1
chr10	133667599	133667744	146	21	0.81516	0.299641	0.515519	71.4772	.	-1	-1
chr14	93959308	93959582	275	22	0.581384	0.153427	0.427957	70.9064	chr14	93959360	93959698
chr12	41709646	41709998	353	10	0.83313	0.150292	0.682838	70.1247	chr12	41709609	41710209
chr20	45359796	45360087	292	16	0.849971	0.348364	0.501607	67.4935	chr20	45359782	45360019
chr7	4590806	4590983	178	12	0.207031	0.92675	-0.719718	-67.1798	.	-1	-1
chr11	111441374	111441781	408	18	0.907762	0.507059	0.400703	66.87	.	-1	-1
chr16	31265362	31265727	366	18	0.814152	0.323791	0.490361	66.4698	chr16	31265398	31265698
chr6	44735625	44735937	313	15	0.770933	0.259454	0.511479	65.7706	chr6	44735624	44735918
chr15	70853151	70853424	274	16	0.619558	0.176113	0.443445	64.9012	chr15	70853300	70853460
chr5	177537856	177538052	197	18	0.85415	0.31112	0.54303	64.4967	chr5	177537799	177538052
chr10	95552661	95553168	508	12	0.901997	0.259433	0.642564	64.1961	chr10	95552706	95552921
chrX	61225345	61225424	80	11	0.886629	0.135842	0.750787	63.5666	.	-1	-1
chr14	35159961	35160182	222	11	0.731458	0.102118	0.629339	63.3771	.	-1	-1
chrY	12497759	12497952	194	15	0.827843	0.2253	0.602543	62.5785	.	-1	-1
chrX	119768500	119768760	261	18	0.910946	0.52682	0.384126	60.8696	.	-1	-1
chr15	67174977	67175213	237	13	0.789638	0.231965	0.557673	60.7413	.	-1	-1
chr22	21120421	21120537	117	15	0.215359	0.787426	-0.572067	-60.2165	.	-1	-1
chr21	44785984	44786194	211	18	0.786489	0.36617	0.42032	59.802	chr21	44785670	44785998
chr19	29459444	29459668	225	18	0.840384	0.418746	0.421638	58.3249	.	-1	-1
chr17	43578582	43578998	417	14	0.517922	0.109945	0.407977	58.2031	chr17	43578749	43579145
chr6	53734508	53734855	348	16	0.709909	0.232908	0.477	58.075	.	-1	-1
chrX	115737647	115737758	112	18	0.362635	0.836004	-0.473369	-57.975	.	-1	-1
chr15	89101859	89102171	313	12	0.909182	0.403995	0.505187	57.8678	.	-1	-1
chr19	1195839	1196015	177	18	0.330123	0.819968	-0.489845	-57.7512	.	-1	-1
chr12	37052571	37052911	341	14	0.355996	0.865672	-0.509676	-57.5041	.	-1	-1
chr4	168589094	168589491	398	14	0.79324	0.296168	0.497072	57.3382	.	-1	-1
chr22	31646696	31647023	328	12	0.811696	0.238114	0.573583	57.2234	.	-1	-1
chr11	53630004	53630239	236	11	0.909885	0.303546	0.606339	57.0512	.	-1	-1
chr10	79331827	79332117	291	14	0.858914	0.325844	0.53307	56.5606	chr10	79331803	79332051
chr6	4336856	4337036	181	8	0.896567	0.209444	0.687123	56.1516	chr6	4336821	4337081
chr18	58230671	58230974	304	14	0.566218	0.0957698	0.470449	55.7119	chr18	58230908	58231180
chr9	88089617	88089907	291	15	0.699193	0.239506	0.459687	55.6806	.	-1	-1
chr17	1309761	1309863	103	15	0.242836	0.749197	-0.506361	-55.4173	.	-1	-1
chrX	39908226	39908460	235	16	0.679065	0.267531	0.411534	53.8486	.	-1	-1
chr5	74315769	74316524	756	12	0.847507	0.335695	0.511812	53.3662	.	-1	-1
chrX	59395742	59395989	248	14	0.854718	0.3305	0.524218	53.2882	.	-1	-1
chr15	92663428	92663580	153	17	0.874674	0.43883	0.435845	53.202	chr15	92663192	92663505
chr10	102627878	102628161	284	14	0.864285	0.401686	0.462599	53.166	chr10	102627750	102628120
chr2	92704018	92704365	348	11	0.791343	0.223178	0.568165	53.0368	.	-1	-1
chr11	96338879	96339061	183	8	0.846333	0.168707	0.677625	52.8962	.	-1	-1
chr14	35403101	35403365	265	14	0.829492	0.369915	0.459577	52.4735	.	-1	-1
chr1	203180580	203180946	367	14	0.918594	0.483126	0.435468	52.2583	.	-1	-1
chr5	116454452	116454692	241	14	0.888988	0.459018	0.42997	52.2526	.	-1	-1
chr21	8258337	8258477	141	15	0.159307	0.600875	-0.441567	-52.2495	.	-1	-1
chr20	9072702	9073212	511	11	0.858249	0.306177	0.552072	52.235	chr20	9072939	9073171
chr12	121851749	121851871	123	12	0.373024	0.865578	-0.492554	-51.7668	.	-1	-1
chr1	14921203	14921409	207	14	0.843753	0.353217	0.490536	51.6308	chr1	14921163	14921323
chr19	47935450	47935664	215	14	0.124104	0.67213	-0.548026	-51.4978	.	-1	-1
chr15	19265901	19267289	1389	12	0.913449	0.226532	0.686917	51.4065	.	-1	-1
chr7	106424963	106425374	412	10	0.86721	0.273875	0.593336	51.3379	chr7	106425050	106425273
chrX	52701443	52701546	104	8	0.138215	0.920639	-0.782424	-51.3284	.	-1	-1
chr7	69651405	69651528	124	8	0.876117	0.188348	0.687769	51.3064	.	-1	-1
chr3	124409940	124410216	277	9	0.766914	0.18502	0.581894	51.2741	.	-1	-1
chr11	65279906	65279963	58	10	0.883955	0.28957	0.594386	51.0943	.	-1	-1
chr4	81550093	81550290	198	14	0.857397	0.384589	0.472808	51.0922	chr4	81550040	81550220
chr18	17075893	17076117	225	13	0.899551	0.387441	0.51211	51.034	.	-1	-1
chr9	124010353	124010599	247	14	0.857503	0.441953	0.41555	50.9903	chr9	124010331	124010648
chr15_KI270727v1_random	96008	96121	114	15	0.505818	0.936863	-0.431045	-50.6325	.	-1	-1
chr4	110183731	110183937	207	10	0.819641	0.203454	0.616187	50.1061	.	-1	-1
chr9	44691838	44691894	57	10	0.877167	0.173643	0.703525	50.0342	.	-1	-1
chr21	44170806	44171297	492	13	0.895025	0.444587	0.450438	49.918	chr21	44170932	44171188
chr20	26959886	26960152	267	12	0.302153	0.878925	-0.576772	-49.6628	.	-1	-1
chr1	205324924	205325158	235	12	0.781144	0.246148	0.534995	49.3502	.	-1	-1
chr10	104330393	104330536	144	12	0.662137	0.144729	0.517408	49.263	.	-1	-1
chr1	198778260	198778527	268	12	0.80198	0.256769	0.545211	49.2493	chr1	198778243	198778498
chr9	98993763	98993912	150	12	0.873662	0.350928	0.522734	49.0147	.	-1	-1
chr18	16328905	16329254	350	11	0.933144	0.277622	0.655522	48.9959	.	-1	-1
chr18	77568264	77568487	224	10	0.691777	0.147103	0.544674	48.8482	chr18	77568192	77568500
chr18	16009726	16009921	196	12	0.314891	0.87122	-0.556329	-48.1944	.	-1	-1
chrX	59111392	59111709	318	11	0.231831	0.817947	-0.586116	-48.0457	.	-1	-1
chr5	143054607	143054814	208	10	0.790281	0.198619	0.591661	47.5787	.	-1	-1
chr3	183285904	183286072	169	14	0.839119	0.38722	0.451899	47.371	.	-1	-1
chr1	172025009	172025237	229	10	0.853556	0.249865	0.603691	47.2492	.	-1	-1
chr10	48058682	48058855	174	12	0.923978	0.367326	0.556652	46.5925	.	-1	-1
chr1	219574614	219574916	303	8	0.706703	0.0798578	0.626845	46.0184	chr1	219574564	219575000
chr18	19832095	19832281	187	9	0.900783	0.189737	0.711046	45.9607	.	-1	-1
chr9	79189531	79190171	641	10	0.664354	0.139468	0.524886	45.8293	chr9	79189669	79189955
chr2	1107855	1108063	209	13	0.822669	0.318419	0.50425	45.5164	.	-1	-1
chr10	3902561	3902668	108	10	0.959569	0.458987	0.500582	45.1539	.	-1	-1
chr1	228619056	228619190	135	13	0.717152	0.192458	0.524693	44.793	.	-1	-1
chr12	76085665	76085772	108	10	0.621613	0.0785892	0.543024	44.6772	.	-1	-1
chr12	27866779	27866951	173	10	0.841136	0.296775	0.544362	44.5049	.	-1	-1
chr11	63581569	63581842	274	10	0.723858	0.162009	0.561849	44.4421	chr11	63581325	63581662
chr4	102718832	102719046	215	9	0.535475	0.0389822	0.496493	44.3896	chr4	102718910	102719275
chr9	45465228	45465329	102	9	0.935961	0.244683	0.691278	44.3202	.	-1	-1
chr19	47914418	47914562	145	13	0.887738	0.374913	0.512825	44.307	.	-1	-1
chr15	49778959	49779081	123	10	0.799823	0.223865	0.575958	44.1457	.	-1	-1
chr18	18687635	18687852	218	11	0.822943	0.244179	0.578764	44.1045	.	-1	-1
chr1	122302036	122302097	62	9	0.248228	0.948871	-0.700643	-43.7215	.	-1	-1
chr17	72126821	72127108	288	8	0.792022	0.165574	0.626448	43.2186	chr17	72127007	72127233
chrX	17502738	17502836	99	8	0.927787	0.233515	0.694272	43.1185	.	-1	-1
chr17	8837715	8837891	177	12	0.812339	0.338607	0.473732	42.9953	.	-1	-1
chr20	27621077	27621946	870	11	0.904367	0.27882	0.625547	42.9569	.	-1	-1
chr6	150141161	150141418	258	12	0.917994	0.53189	0.386104	42.9072	chr6	150141184	150141472
chr5	151083399	151083690	292	10	0.913858	0.39626	0.517598	42.4985	.	-1	-1
chr16	37978463	37979931	1469	11	0.827936	0.209267	0.618669	42.3169	.	-1	-1
chr6	55868935	55869448	514	10	0.675245	0.130583	0.544662	42.0856	.	-1	-1
chr5	124936016	124936173	158	4	0.948432	0.228405	0.720027	42.036	chr5	124935957	124936288
chr7	152575228	152575460	233	12	0.623103	0.197666	0.425437	41.8469	chr7	152574864	152575436
chr4	81574042	81574229	188	8	0.939839	0.35832	0.581519	41.8447	chr4	81573991	81574196
chr6	59528483	59528703	221	12	0.858765	0.341302	0.517463	41.735	.	-1	-1
chr13	40518610	40518807	198	8	0.903367	0.302372	0.600995	41.6418	.	-1	-1
chr9	86508495	86508622	128	10	0.932833	0.444206	0.488627	41.5328	.	-1	-1
chr6	31578432	31578716	285	10	0.594907	0.112726	0.482182	41.3683	chr6	31578311	31578751
chr4	50958998	50959157	160	12	0.882865	0.388362	0.494503	41.1661	.	-1	-1
chr3	120831095	120831317	223	8	0.817294	0.269665	0.547628	41.0807	chr3	120831068	120831342
chr7	60596750	60596941	192	10	0.905949	0.340237	0.565712	40.9461	.	-1	-1
chr7	26156305	26156575	271	8	0.784361	0.19096	0.593401	40.7886	chr7	26156394	26156654
chr5	111517898	111518114	217	5	0.923413	0.206836	0.716577	40.6195	chr5	111518030	111518239
chr21	9122839	9123093	255	7	0.13711	0.852388	-0.715278	-40.2136	.	-1	-1
chr10	114026723	114027072	350	12	0.715949	0.280045	0.435903	40.0915	.	-1	-1
chr1	92723874	92724052	179	12	0.843697	0.404436	0.439261	39.9621	chr1	92723811	92724084
chr12	13053504	13053860	357	11	0.882872	0.441311	0.44156	39.8798	chr12	13053579	13053959
chr7	70668689	70668876	188	10	0.851893	0.389073	0.462819	39.841	chr7	70668623	70668896
chr1	172476239	172476415	177	4	0.800827	0.0222228	0.778605	39.8204	chr1	172476190	172476422
chrX	60056237	60056494	258	12	0.731913	0.245453	0.48646	39.7845	.	-1	-1
chr7	59341470	59341726	257	11	0.843567	0.319668	0.5239	39.6949	.	-1	-1
chr12	31205083	31205299	217	6	0.977255	0.338312	0.638943	39.5725	.	-1	-1
chr6	10355358	10355498	141	10	0.636624	0.145708	0.490916	39.5459	chr6	10355397	10355681
chr16	23517430	23517524	95	12	0.363424	0.866725	-0.503301	-39.3878	.	-1	-1
chr2	130857855	130857961	107	9	0.309029	0.936525	-0.627495	-39.1786	.	-1	-1
chr16	37740484	37740702	219	12	0.887553	0.45408	0.433473	39.1607	.	-1	-1
chr1	19550496	19550674	179	11	0.748849	0.259855	0.488994	39.0656	chr1	19550292	19550596
chr10	39871667	39871826	160	12	0.764918	0.263183	0.501735	38.9638	.	-1	-1
chr1	155124678	155124900	223	11	0.885332	0.476619	0.408713	38.89	chr1	155124495	155124986
chr1	143799075	143799153	79	13	0.256836	0.725819	-0.468983	-38.77	.	-1	-1
chr3	91903988	91904381	394	7	0.222794	0.918384	-0.695591	-38.6111	.	-1	-1
chr5	76831222	76831310	89	4	0.948304	0.202998	0.745306	38.4611	chr5	76831203	76831393
chr17	40180154	40180542	389	9	0.695898	0.187519	0.508379	38.0061	chr17	40180263	40180437
chr1	183181002	183181131	130	8	0.810598	0.159045	0.651553	37.9497	chr1	183180811	183181059
chr20	51541428	51541519	92	10	0.747577	0.282389	0.465189	37.9165	.	-1	-1
chr5	163434579	163434974	396	9	0.725814	0.171477	0.554337	37.8427	chr5	163434534	163434743
chr3	23667618	23667996	379	10	0.835503	0.387524	0.447978	37.8215	.	-1	-1
chr2	151760991	151761041	51	11	0.935291	0.49464	0.440651	37.6968	.	-1	-1
chr18	19504112	19504270	159	11	0.840749	0.356832	0.483917	37.0937	.	-1	-1
chr9	111511658	111511835	178	10	0.591814	0.139643	0.452172	36.8806	chr9	111511639	111511868
chr6	132321589	132321812	224	10	0.928482	0.50407	0.424412	36.7611	.	-1	-1
chr3	182568214	182568578	365	10	0.8817	0.410747	0.470952	36.6866	.	-1	-1
chr13	48291815	48292109	295	4	0.950519	0.241873	0.708645	36.491	.	-1	-1
chr22	30195892	30196205	314	10	0.599902	0.136877	0.463026	36.4095	chr22	30196189	30196424
chr3	92792325	92794331	2007	8	0.198694	0.887623	-0.688929	-36.3578	.	-1	-1
chr17	23730165	23730264	100	8	0.225753	0.894148	-0.668395	-36.163	.	-1	-1
chr8	76641363	76641777	415	9	0.605887	0.156685	0.449203	36.1385	chr8	76641483	76641728
chr18	18942184	18942273	90	7	0.927724	0.206808	0.720916	35.9518	.	-1	-1
chr8	42020222	42020586	365	9	0.580559	0.11831	0.462248	35.8526	chr8	42020318	42020552
chr17	23383617	23383857	241	11	0.194694	0.705077	-0.510383	-35.3378	.	-1	-1
chr2	93873733	93873974	242	10	0.874249	0.369171	0.505078	35.2468	.	-1	-1
chr15	31077240	31077411	172	7	0.766846	0.171123	0.595723	35.1958	chr15	31077170	31077447
chr1	225548518	225548593	76	6	0.813076	0.187115	0.625961	34.8791	.	-1	-1
chr12	105095436	105095612	177	10	0.792166	0.308359	0.483808	34.8554	chr12	105095364	105095591
chr7	61236714	61236826	113	9	0.763454	0.149107	0.614347	34.7888	.	-1	-1
chr16	38221117	38221684	568	10	0.317581	0.90626	-0.588678	-34.724	.	-1	-1
chr5	174829706	174829878	173	10	0.599942	0.145834	0.454108	34.5245	chr5	174829297	174829905
chr2	161397857	161398004	148	8	0.890926	0.371284	0.519642	34.482	.	-1	-1
chr4	51694925	51695037	113	8	0.920007	0.296272	0.623736	34.4768	.	-1	-1
chr10	124095191	124095464	274	10	0.863002	0.44604	0.416962	34.3713	chr10	124095258	124095483
chr7	83984143	83984391	249	9	0.827695	0.386611	0.441084	34.0636	.	-1	-1
chr8	17052541	17052748	208	6	0.683945	0.0346063	0.649339	34.0047	chr8	17052406	17052935
chrY	11204476	11204604	129	9	0.628581	0.0893214	0.539259	33.9625	.	-1	-1
chr7	92945961	92946131	171	8	0.644734	0.094492	0.550242	33.7548	chr7	92945963	92946179
chr14	55366339	55366583	245	6	0.858276	0.257671	0.600604	33.6738	.	-1	-1
chr15	19461203	19461375	173	10	0.784874	0.29987	0.485004	33.4699	.	-1	-1
chrX	127749500	127749587	88	9	0.402161	0.846534	-0.444374	-33.3915	.	-1	-1
chr12	32252569	32252714	146	8	0.904323	0.408402	0.495922	33.2009	chr12	32252600	32252775
chr16	37089811	37089883	73	10	0.775206	0.226532	0.548673	33.1664	.	-1	-1
chr18	21911670	21911945	276	10	0.881728	0.447957	0.433771	33.1527	.	-1	-1
chr13	29743485	29743637	153	10	0.566492	0.138329	0.428163	32.731	chr13	29743502	29743847
chr9	44244980	44245126	147	10	0.887017	0.38955	0.497467	32.6527	.	-1	-1
chr5	80517026	80517125	100	8	0.528574	0.0654199	0.463154	32.5784	.	-1	-1
chr2	219126712	219127023	312	8	0.682057	0.196186	0.485872	32.4923	chr2	219126706	219126978
chr18	19766406	19766496	91	8	0.920007	0.271916	0.648091	32.4818	.	-1	-1
chr17	24916380	24916497	118	10	0.893468	0.360055	0.533413	32.4706	.	-1	-1
chr7	123190257	123190523	267	4	0.818463	0.248678	0.569785	32.4339	chr7	123190214	123190459
chr1	117897715	117897936	222	8	0.891538	0.321882	0.569657	32.3715	chr1	117897599	117897879
chrY	11430715	11430872	158	9	0.838944	0.299953	0.538991	32.3389	.	-1	-1
chr5	70860510	70860571	62	8	0.398462	0.953404	-0.554942	-32.2296	.	-1	-1
chr10	88118793	88119010	218	8	0.931739	0.421217	0.510522	32.2282	.	-1	-1
chr7	94620744	94621041	298	4	0.893758	0.231329	0.662429	32.0905	.	-1	-1
chr4	91268744	91268930	187	7	0.718766	0.197902	0.520863	32.0376	.	-1	-1
chr16	37868684	37868879	196	9	0.829033	0.316235	0.512799	31.6994	.	-1	-1
chr18	19211782	19211861	80	8	0.339495	0.935913	-0.596418	-31.6028	.	-1	-1
chr11	134741870	134742002	133	9	0.802708	0.364439	0.43827	31.5991	.	-1	-1
chr4	185857720	185857822	103	8	0.556717	0.0649375	0.49178	31.5981	chr4	185857668	185857951
chr16_KI270728v1_random	1094879	1094965	87	8	0.071134	0.672599	-0.601465	-31.5805	.	-1	-1
chr17	23440294	23440347	54	6	0.966808	0.305964	0.660844	31.4575	.	-1	-1
chr10	116888775	116888971	197	9	0.856407	0.435008	0.421398	31.4008	.	-1	-1
chr12	2358181	2358245	65	8	0.77249	0.277681	0.494809	31.367	chr12	2358052	2358212
chr2	16400294	16400481	188	8	0.530969	0.062497	0.468472	31.3592	chr2	16400301	16400639
chr21	8392730	8392795	66	10	0.856624	0.39377	0.462853	31.3297	.	-1	-1
chr5	59209904	59210244	341	5	0.819626	0.188531	0.631096	31.0478	chr5	59209918	59210148
chr9	28743232	28743359	128	10	0.86434	0.426447	0.437893	31.0416	.	-1	-1
chr17	42329078	42329213	136	4	0.851528	0.165376	0.686152	30.902	chr17	42329058	42329332
chr15	18729167	18729578	412	8	0.283865	0.848049	-0.564184	-30.8894	.	-1	-1
chr9	45206108	45206267	160	10	0.510138	0.935387	-0.425249	-30.8599	.	-1	-1
chr9	67334145	67338126	3982	12	0.29004	0.730294	-0.440254	-30.7588	.	-1	-1
chr7	28531068	28531365	298	8	0.908317	0.475722	0.432595	30.6144	chr7	28530910	28531228
chr15	84493435	84493507	73	9	0.921859	0.458277	0.463582	30.6069	.	-1	-1
chr3	92537548	92538737	1190	7	0.821997	0.155269	0.666728	30.4984	.	-1	-1
chr13	17525114	17525349	236	8	0.763724	0.261811	0.501912	30.4224	.	-1	-1
chr18	19115489	19115578	90	7	0.935961	0.345239	0.590722	30.3303	.	-1	-1
chr2	93027010	93027188	179	8	0.428408	0.889921	-0.461513	-30.2499	.	-1	-1
chr1	200153419	200153594	176	6	0.971422	0.280268	0.691154	30.2338	.	-1	-1
chr12	35031929	35032005	77	5	0.923804	0.142225	0.781578	30.1987	.	-1	-1
chr20	28061159	28061229	71	5	0.138215	0.924422	-0.786207	-30.1146	.	-1	-1
chrX	61698871	61699120	250	9	0.24089	0.753901	-0.513011	-30.0363	.	-1	-1
chrX	135650070	135650273	204	9	0.782053	0.38196	0.400093	30.0087	.	-1	-1
chr17	73166941	73167233	293	8	0.884987	0.464068	0.420919	29.9204	chr17	73166892	73167194
chr1	92962561	92962612	52	8	0.44774	0.0549513	0.392789	29.8398	.	-1	-1
chr9	41845615	41845768	154	9	0.706686	0.165244	0.541443	29.8355	.	-1	-1
chr16	37716699	37716790	92	6	0.912763	0.185297	0.727467	29.5227	.	-1	-1
chrX	58734923	58735307	385	8	0.702335	0.121671	0.580664	29.2981	.	-1	-1
chr18	17834492	17834682	191	9	0.910679	0.482094	0.428586	29.2878	.	-1	-1
chr12	113280353	113280459	107	8	0.89328	0.453985	0.439295	29.1089	.	-1	-1
chr2	36492191	36492431	241	8	0.767873	0.272204	0.495669	29.0318	chr2	36492339	36492772
chr10	39843091	39843187	97	6	0.909639	0.185297	0.724342	28.9438	.	-1	-1
chr12	36898919	36899109	191	7	0.477414	0.959026	-0.481611	-28.9094	.	-1	-1
chr14_GL000009v2_random	27469	28710	1242	5	0.844854	0.10389	0.740964	28.8691	.	-1	-1
chrX	58853495	58853634	140	7	0.799102	0.153387	0.645715	28.8201	.	-1	-1
chr22	39148928	39149095	168	9	0.770199	0.374722	0.395477	28.793	.	-1	-1
chrY	8139922	8140006	85	7	0.254004	0.917696	-0.663692	-28.7317	.	-1	-1
chr5	143155094	143155321	228	8	0.898845	0.507282	0.391563	28.7289	.	-1	-1
chr12	95199024	95199233	210	8	0.943041	0.52468	0.418362	28.685	.	-1	-1
chr16	36719207	36719292	86	6	0.926141	0.240286	0.685855	28.6542	.	-1	-1
chr4	50580237	50580556	320	7	0.886385	0.254186	0.632199	28.6455	.	-1	-1
chr5	175437851	175438029	179	8	0.830541	0.382631	0.44791	28.6336	.	-1	-1
chr6	58624868	58624936	69	9	0.386391	0.888791	-0.5024	-28.6322	.	-1	-1
chr18	17130937	17131086	150	9	0.853233	0.406312	0.446921	28.6159	.	-1	-1
chr19	50115834	50115913	80	9	0.616529	0.177779	0.43875	28.609	.	-1	-1
chr15	32558403	32558464	62	8	0.395812	0.946258	-0.550446	-28.5763	.	-1	-1
chr8	45745309	45745466	158	7	0.284615	0.917696	-0.633082	-28.4899	.	-1	-1
chr5	142226879	142226942	64	8	0.900817	0.435157	0.46566	28.4481	.	-1	-1
chr8	23336085	23336153	69	9	0.84102	0.451473	0.389547	28.4245	.	-1	-1
chr6	170713376	170713447	72	9	0.431611	0.880502	-0.448891	-28.3778	.	-1	-1
chr9	45095724	45095779	56	7	0.834995	0.31839	0.516604	28.3677	.	-1	-1
chr8	54328187	54328423	237	8	0.701764	0.229917	0.471847	28.3585	chr8	54328270	54328529
chr1	32431956	32432264	309	6	0.86567	0.371547	0.494123	28.3442	chr1	32431958	32432318
chr5	138461350	138461480	131	7	0.878632	0.367999	0.510634	28.3369	.	-1	-1
chr5	151141572	151141625	54	9	0.867781	0.465495	0.402285	28.1925	.	-1	-1
chr9	43984207	43984366	160	8	0.933822	0.50603	0.427792	28.1668	.	-1	-1
chr8	45085815	45085899	85	6	0.925045	0.226532	0.698512	27.8435	.	-1	-1
chr15	80419698	80419886	189	8	0.844318	0.436397	0.407921	27.6981	chr15	80419700	80419894
chr3	92237664	92237715	52	8	0.275654	0.861509	-0.585855	-27.6845	.	-1	-1
chr15	18924316	18924375	60	7	0.254004	0.903364	-0.64936	-27.5094	.	-1	-1
chr5	142857531	142857746	216	8	0.904486	0.444955	0.459531	27.4537	chr5	142857593	142857764
chr5	46810000	46810326	327	5	0.144349	0.810541	-0.666192	-27.368	.	-1	-1
chr11	52151228	52151326	99	8	0.555533	0.952195	-0.396661	-27.3666	.	-1	-1
chrX	59531810	59531924	115	7	0.179019	0.79917	-0.620151	-27.3512	.	-1	-1
chr15	39275266	39275510	245	7	0.984296	0.529288	0.455008	27.3414	.	-1	-1
chr16	36565554	36565625	72	5	0.905949	0.135842	0.770107	27.3381	.	-1	-1
chr1	201184681	201184735	55	6	0.794759	0.245316	0.549443	27.2894	.	-1	-1
chr11	95104275	95104402	128	8	0.841389	0.398249	0.44314	27.2389	.	-1	-1
chr8	135879050	135879144	95	6	0.893468	0.185297	0.708172	27.1366	.	-1	-1
chr3	118907979	118908176	198	4	0.743908	0.0803158	0.663593	27.1137	.	-1	-1
chr18	16240279	16240369	91	8	0.939684	0.393436	0.546248	27.0873	.	-1	-1
chr11	51261066	51261164	99	8	0.836243	0.315993	0.52025	27.0521	.	-1	-1
chr8	90859161	90859341	181	6	0.729593	0.197286	0.532307	26.969	chr8	90858855	90859198
chr20	28484462	28484521	60	7	0.254004	0.903364	-0.64936	-26.9637	.	-1	-1
chr1	17582505	17582561	57	8	0.865438	0.424947	0.440491	26.8378	.	-1	-1
chr20	28221702	28221779	78	8	0.93343	0.393436	0.539994	26.7985	.	-1	-1
chr18	17690244	17690334	91	5	0.944039	0.199848	0.744191	26.7685	.	-1	-1
chr10	88993191	88993439	249	6	0.799614	0.271694	0.52792	26.743	.	-1	-1
chr5	89283156	89283318	163	6	0.832399	0.293699	0.5387	26.5071	.	-1	-1
chr18	58191402	58191768	367	6	0.778753	0.29051	0.488242	26.4079	chr18	58191636	58191944
chr10	39933665	39933846	182	7	0.854124	0.278345	0.575779	26.3579	.	-1	-1
chr7	59655855	59655946	92	6	0.912763	0.231521	0.681242	26.1183	.	-1	-1
chr5	36740048	36740112	65	4	0.70225	0.0333915	0.668858	26.0712	chr5	36739984	36740200
chr20	28419312	28419426	115	8	0.836143	0.271916	0.564227	26.057	.	-1	-1
chr9	29020075	29020292	218	6	0.299046	0.784025	-0.484979	-26.0227	.	-1	-1
chr4	50107491	50107698	208	7	0.941947	0.472583	0.469364	26	.	-1	-1
chr11	54026359	54026456	98	4	0.971071	0.169839	0.801233	25.9191	.	-1	-1
chr1	143301355	143301436	82	6	0.229927	0.913416	-0.683489	-25.7886	.	-1	-1
chr11	54367707	54367924	218	6	0.902612	0.35161	0.551003	25.602	.	-1	-1
chr12	89960201	89960319	119	4	0.883426	0.20408	0.679346	25.5552	chr12	89960282	89960521
chr8	45349574	45349671	98	5	0.202989	0.944558	-0.741569	-25.4416	.	-1	-1
chr7	59778848	59778939	92	7	0.882312	0.309955	0.572357	25.4275	.	-1	-1
chr16	38036459	38036545	87	8	0.229927	0.760571	-0.530644	-25.2562	.	-1	-1
chr16	38094543	38094629	87	8	0.959905	0.537075	0.42283	25.1184	.	-1	-1
chr7	59984525	59984716	192	7	0.19796	0.742809	-0.544849	-25.0804	.	-1	-1
chr9	29018184	29018425	242	7	0.246205	0.694738	-0.448533	-24.9821	.	-1	-1
chr18	32859830	32859962	133	6	0.169812	0.734666	-0.564854	-24.9775	.	-1	-1
chr16	37045382	37045490	109	7	0.835065	0.315671	0.519393	24.8849	.	-1	-1
chr12	35629917	35630003	87	6	0.832896	0.381905	0.450991	24.8763	.	-1	-1
chr3	91610265	91610375	111	8	0.309766	0.818249	-0.508483	-24.8586	.	-1	-1
chr3	190231977	190232176	200	5	0.946448	0.458411	0.488037	24.794	.	-1	-1
chr5	46736030	46736364	335	7	0.668802	0.115367	0.553435	24.7921	.	-1	-1
chr8	88178726	88178972	247	7	0.659284	0.228028	0.431256	24.7554	.	-1	-1
chr8	44115557	44115641	85	7	0.869495	0.364113	0.505382	24.6875	.	-1	-1
chr20	27823250	27823335	86	8	0.938713	0.489107	0.449607	24.6649	.	-1	-1
chr16_KI270728v1_random	1735064	1735133	70	5	0.905949	0.206377	0.699572	24.6586	.	-1	-1
chr8	45717245	45717343	99	7	0.445862	0.920002	-0.47414	-24.6538	.	-1	-1
chr20	27993959	27994043	85	4	0.935961	0.135842	0.800119	24.611	.	-1	-1
chr9	43678540	43678629	90	7	0.851698	0.304954	0.546744	24.5426	.	-1	-1
chr9	62267885	62267947	63	4	0.138215	0.93529	-0.797075	-24.528	.	-1	-1
chrX	62167868	62167946	79	8	0.920007	0.436098	0.483909	24.5042	.	-1	-1
chr4	50501958	50502056	99	5	0.217528	0.924422	-0.706894	-24.4819	.	-1	-1
chr3_GL000221v1_random	3168	3470	303	7	0.257721	0.676317	-0.418596	-24.429	.	-1	-1
chrX	61053899	61054083	185	7	0.367511	0.917696	-0.550186	-24.4168	.	-1	-1
chrX	63748094	63748280	187	6	0.393428	0.849052	-0.455624	-24.4067	.	-1	-1
chr7	60522247	60522337	91	6	0.213977	0.815653	-0.601676	-24.367	.	-1	-1
chr18	17625315	17625441	127	7	0.866926	0.322061	0.544865	24.3069	.	-1	-1
chr18	39646834	39647026	193	6	0.283015	0.765069	-0.482054	-24.2818	.	-1	-1
chr18	17047668	17047781	114	7	0.91587	0.391565	0.524306	24.2758	.	-1	-1
chr18	19397877	19397938	62	6	0.205442	0.790817	-0.585375	-24.267	.	-1	-1
chr16	36955285	36955356	72	7	0.878949	0.346861	0.532088	24.2602	.	-1	-1
chr16	37235159	37235230	72	7	0.875872	0.493057	0.382815	24.1169	.	-1	-1
chr18	19956589	19956887	299	6	0.34249	0.928742	-0.586252	-24.1001	.	-1	-1
chr9	61866547	61866624	78	5	0.170688	0.906617	-0.735928	-24.0927	.	-1	-1
chr2	133425109	133425388	280	6	0.934806	0.479469	0.455338	24.0734	.	-1	-1
chr20	28215940	28217370	1431	7	0.838538	0.363788	0.474751	24.0731	.	-1	-1
chr9	44995793	44995874	82	6	0.893468	0.226532	0.666936	24.0218	.	-1	-1
chr17	61113336	61113508	173	7	0.938298	0.507369	0.43093	23.8346	.	-1	-1
chrX	59797583	59797660	78	6	0.893468	0.226532	0.666936	23.7646	.	-1	-1
chr10	40603875	40603961	87	6	0.23496	0.870315	-0.635355	-23.7508	.	-1	-1
chrX	59990938	59991027	90	6	0.229927	0.894148	-0.664221	-23.7017	.	-1	-1
chr8	45390999	45391171	173	6	0.125287	0.656943	-0.531655	-23.6485	.	-1	-1
chr4	184319423	184319501	79	6	0.802975	0.321989	0.480986	23.6339	.	-1	-1
chr2	134209278	134209346	69	6	0.893468	0.226532	0.666936	23.6058	.	-1	-1
chrX	58648746	58648834	89	7	0.383187	0.936525	-0.553338	-23.5994	.	-1	-1
chr9	43984443	43984708	266	6	0.943953	0.436378	0.507575	23.5643	.	-1	-1
chr3	55801236	55801312	77	6	0.887111	0.401458	0.485653	23.5618	.	-1	-1
chr7	59103124	59103228	105	7	0.943093	0.530959	0.412134	23.547	.	-1	-1
chrX	60311527	60311743	217	7	0.252411	0.783576	-0.531165	-23.5447	.	-1	-1
chr18	16665698	16665787	90	4	0.958454	0.169839	0.788615	23.4515	.	-1	-1
chr14	18609300	18609353	54	6	0.231108	0.734403	-0.503295	-23.4299	.	-1	-1
chr20	27503637	27504650	1014	5	0.209186	0.874696	-0.66551	-23.3847	.	-1	-1
chr16	37594911	37594997	87	6	0.284615	0.901729	-0.617115	-23.361	.	-1	-1
chr15	18023372	18023469	98	6	0.893468	0.226532	0.666936	23.3298	.	-1	-1
chrX	61725282	61725345	64	6	0.271173	0.894148	-0.622975	-23.2846	.	-1	-1
chr16	37257566	37257651	86	7	0.34324	0.774178	-0.430938	-23.2001	.	-1	-1
chr18	19348700	19348752	53	6	0.229927	0.858723	-0.628796	-23.1977	.	-1	-1
chr15	18490537	18490597	61	6	0.893468	0.263409	0.630059	23.197	.	-1	-1
chr3	177145097	177145226	130	6	0.900433	0.416278	0.484156	23.1948	.	-1	-1
chrX	135147032	135147094	63	6	0.241528	0.862779	-0.621251	-23.1342	.	-1	-1
chrX	60192395	60192472	78	4	0.935961	0.189556	0.746405	23.0068	.	-1	-1
chr22_KI270737v1_random	30772	30872	101	4	0.920007	0.135842	0.784165	23.0066	.	-1	-1
chr4	51088562	51088755	194	7	0.644244	0.166983	0.477261	22.9829	.	-1	-1
chr10	39892666	39892738	73	4	0.19082	0.936525	-0.745705	-22.9084	.	-1	-1
chr2_KI270716v1_random	117525	117738	214	7	0.480064	0.918698	-0.438634	-22.9017	.	-1	-1
chr6	99501739	99501883	145	6	0.864401	0.474653	0.389748	22.8673	chr6	99501780	99502065
chr7	59616323	59616427	105	7	0.25717	0.760064	-0.502894	-22.7914	.	-1	-1
chr8	45126231	45126501	271	6	0.809768	0.227094	0.582675	22.7376	.	-1	-1
chr10	40397711	40397797	87	6	0.96999	0.528616	0.441374	22.7372	.	-1	-1
chr3	118918663	118918796	134	6	0.0672616	0.508969	-0.441708	-22.7327	.	-1	-1
chr18	18432207	18432328	122	6	0.903765	0.361748	0.542018	22.7133	.	-1	-1
chr17	26514325	26514418	94	4	0.140911	0.920639	-0.779728	-22.5958	.	-1	-1
chr22	30079103	30079280	178	6	0.801242	0.321219	0.480023	22.5917	.	-1	-1
chr4	78349468	78349601	134	7	0.753356	0.282665	0.470691	22.5429	.	-1	-1
chr4	51379619	51379760	142	6	0.825435	0.336986	0.48845	22.5268	.	-1	-1
chr15	26765512	26765680	169	7	0.104818	0.510455	-0.405637	-22.5152	.	-1	-1
chr13	46165643	46165819	177	6	0.69939	0.256214	0.443176	22.4981	.	-1	-1
chr9	45372912	45373001	90	5	0.884089	0.214243	0.669846	22.461	.	-1	-1
chr11	81522473	81522600	128	6	0.622993	0.0925224	0.53047	22.4392	.	-1	-1
chr8	44671382	44671478	97	5	0.905949	0.2045	0.701449	22.388	.	-1	-1
chr15	91948549	91948696	148	6	0.791541	0.34885	0.44269	22.365	.	-1	-1
chrY	11089633	11089772	140	5	0.749349	0.167816	0.581533	22.3574	.	-1	-1
chr2	30155341	30155539	199	4	0.851904	0.240644	0.61126	22.3189	chr2	30155311	30155478
chr2	142142614	142142953	340	6	0.897081	0.40106	0.496021	22.2344	chr2	142142679	142142903
chr6	5037155	5037217	63	4	0.138215	0.920639	-0.782424	-22.1731	.	-1	-1
chrX	61414284	61414377	94	4	0.138215	0.920639	-0.782424	-22.1731	.	-1	-1
chr2	191666767	191666962	196	6	0.804792	0.336087	0.468705	22.1376	.	-1	-1
chr16	32239385	32239481	97	4	0.16813	0.924504	-0.756374	-22.0927	.	-1	-1
chrX	59103176	59103273	98	7	0.896254	0.465223	0.431031	22.0807	.	-1	-1
chr17	25473511	25473568	58	7	0.733076	0.21591	0.517166	22.026	.	-1	-1
chrX	10905093	10905186	94	7	0.306751	0.701502	-0.394751	-21.9782	.	-1	-1
chr12	36000145	36000221	77	4	0.172648	0.945376	-0.772729	-21.9429	.	-1	-1
chr4	49872906	49873065	160	7	0.946427	0.478992	0.467436	21.8752	.	-1	-1
chr10	41039125	41039210	86	5	0.776412	0.106599	0.669812	21.8408	.	-1	-1
chr15	65917220	65917278	59	6	0.637099	0.125683	0.511416	21.839	chr15	65917115	65917419
chr18	18718621	18718710	90	5	0.862881	0.199848	0.663033	21.7895	.	-1	-1
chrX	58800603	58800777	175	7	0.7102	0.176136	0.534064	21.7411	.	-1	-1
chr20	28067028	28067112	85	7	0.795447	0.306932	0.488515	21.711	.	-1	-1
chr18	24740218	24740392	175	6	0.865803	0.352605	0.513198	21.6165	.	-1	-1
chr8	44810759	44810843	85	5	0.183631	0.829941	-0.64631	-21.5938	.	-1	-1
chr5	459086	459218	133	6	0.871417	0.423054	0.448364	21.5918	.	-1	-1
chr2	92762298	92762534	237	6	0.962943	0.548462	0.414481	21.5874	.	-1	-1
chr4	20279193	20279342	150	6	0.939669	0.533228	0.40644	21.5116	.	-1	-1
chr15	21020021	21020169	149	6	0.952555	0.46016	0.492396	21.4858	.	-1	-1
chr21	43176100	43176271	172	6	0.363487	0.913416	-0.549929	-21.4314	.	-1	-1
chr5	129077560	129077797	238	6	0.706623	0.211882	0.494741	21.3995	chr5	129077497	129077727
chr8	44489106	44489190	85	6	0.812666	0.281188	0.531478	21.3907	.	-1	-1
chr20	62213161	62213294	134	6	0.929619	0.427395	0.502224	21.2808	.	-1	-1
chr9	29119678	29119818	141	6	0.776238	0.298179	0.478059	21.2542	.	-1	-1
chr8	43976224	43976316	93	5	0.827349	0.226885	0.600464	21.153	.	-1	-1
chr5	148252549	148252671	123	6	0.149168	0.625105	-0.475937	-21.1511	.	-1	-1
chrX	62223948	62224064	117	6	0.893468	0.336013	0.557455	21.104	.	-1	-1
chr20	28390966	28391050	85	7	0.254004	0.79917	-0.545165	-21.0733	.	-1	-1
chr18	44853235	44853475	241	6	0.914604	0.51991	0.394694	21.0645	chr18	44852969	44853237
chr11	51377531	51377629	99	6	0.893468	0.310759	0.582709	20.995	.	-1	-1
chr3	64759973	64760194	222	5	0.828	0.302472	0.525527	20.93	.	-1	-1
chr2	242162741	242162878	138	7	0.67048	0.153387	0.517093	20.9111	.	-1	-1
chrX	52774369	52774517	149	7	0.155993	0.670013	-0.51402	-20.902	.	-1	-1
chr2	157571453	157571552	100	4	0.808159	0.129878	0.678281	20.8154	.	-1	-1
chr9	45267100	45267201	102	5	0.935961	0.295979	0.639982	20.7377	.	-1	-1
chr15	19633904	19634011	108	6	0.123382	0.661263	-0.537881	-20.6753	.	-1	-1
chr21	9330007	9330078	72	4	0.14258	0.906617	-0.764036	-20.6584	.	-1	-1
chr3	65811927	65811980	54	6	0.322803	0.743913	-0.42111	-20.5333	.	-1	-1
chr1	220497298	220497380	83	5	0.685008	0.205199	0.479809	20.5097	.	-1	-1
chr10	77234947	77235057	111	4	0.654654	0.108451	0.546203	20.5026	.	-1	-1
chr9	44182592	44182682	91	6	0.127199	0.673827	-0.546628	-20.4831	.	-1	-1
chrX	149659549	149660173	625	4	0.27136	0.910175	-0.638814	-20.4711	.	-1	-1
chr18	20058393	20058459	67	5	0.170688	0.812329	-0.641641	-20.3815	.	-1	-1
chr8	44813984	44814068	85	6	0.388652	0.817962	-0.42931	-20.3735	.	-1	-1
chr12	36722547	36722633	87	6	0.928868	0.448423	0.480445	20.2555	.	-1	-1
chr16	90117594	90117658	65	6	0.914545	0.532698	0.381847	20.2235	.	-1	-1
chr8	45849236	45849333	98	6	0.362748	0.882988	-0.520239	-20.1955	.	-1	-1
chr3	5007036	5007104	69	6	0.888024	0.447592	0.440432	20.1451	.	-1	-1
chr12	62847878	62848043	166	4	0.84986	0.267075	0.582785	20.1291	.	-1	-1
chr8	89682507	89682698	192	6	0.848686	0.443465	0.405221	20.0874	.	-1	-1
chrY	9134767	9134889	123	6	0.663981	0.186202	0.477779	20.0798	.	-1	-1
chrX	60222313	60222421	109	6	0.912763	0.362187	0.550576	20.0583	.	-1	-1
chr16	37255345	37255614	270	6	0.881134	0.321998	0.559136	20.0547	.	-1	-1
chr7	61764307	61764367	61	4	0.920007	0.182775	0.737232	20.048	.	-1	-1
chr11	106986312	106986545	234	6	0.765068	0.359283	0.405784	20.0043	.	-1	-1
chr18	18777644	18777729	86	6	0.229927	0.779555	-0.549628	-20.0042	.	-1	-1
chr8	122970770	122970847	78	6	0.917924	0.536292	0.381632	19.9283	chr8	122970600	122970893
chr2	64204336	64204454	119	6	0.908451	0.471248	0.437203	19.8906	chr2	64204267	64204553
chr4	74117148	74117247	100	4	0.79263	0.215408	0.577222	19.8565	.	-1	-1
chr2	164739991	164740236	246	6	0.798926	0.318356	0.48057	19.8038	.	-1	-1
chr12	29682297	29682461	165	6	0.801082	0.301899	0.499183	19.7871	.	-1	-1
chr8	65743358	65743434	77	5	0.959695	0.508563	0.451132	19.7851	.	-1	-1
chr2	87118847	87118947	101	5	0.35852	0.959816	-0.601296	-19.7122	.	-1	-1
chr18	18964385	18964474	90	4	0.920007	0.169839	0.750169	19.6816	.	-1	-1
chr8	44443522	44443621	100	5	0.439756	0.950742	-0.510986	-19.6311	.	-1	-1
chr15_KI270727v1_random	117818	117932	115	4	0.889719	0.243351	0.646368	19.6099	.	-1	-1
chr17	45311962	45312079	118	6	0.739976	0.31917	0.420805	19.5881	.	-1	-1
chr20	28060686	28060820	135	6	0.708034	0.181317	0.526716	19.5625	.	-1	-1
chr18	19589625	19589686	62	4	0.893468	0.143916	0.749552	19.5503	.	-1	-1
chr1	228632455	228632511	57	6	0.742251	0.317206	0.425045	19.5229	.	-1	-1
chr7	58875372	58875457	86	6	0.254004	0.781004	-0.527	-19.4764	.	-1	-1
chr18	16229397	16229482	86	5	0.829282	0.361434	0.467847	19.4627	.	-1	-1
chr6	8706611	8706706	96	4	0.813278	0.273604	0.539673	19.4353	chr6	8706563	8706903
chr8	45708428	45708513	86	4	0.241362	0.93529	-0.693928	-19.373	.	-1	-1
chrX	62047130	62047219	90	5	0.877167	0.199848	0.677319	19.2801	.	-1	-1
chr17	23365191	23365249	59	6	0.229927	0.803078	-0.573151	-19.2105	.	-1	-1
chr1	197711349	197711431	83	4	0.318883	0.920639	-0.601756	-19.1766	.	-1	-1
chr5	78076428	78076664	237	5	0.658267	0.211932	0.446335	19.17	chr5	78076269	78076635
chr16	36744002	36744073	72	5	0.351745	0.936525	-0.584779	-19.11	.	-1	-1
chr8	64756855	64756957	103	6	0.626892	0.203361	0.423531	19.0585	chr8	64756865	64757032
chr10	65501450	65501547	98	6	0.805711	0.308139	0.497572	19.0282	chr10	65501260	65501468
chr15	19556865	19557493	629	10	0.577655	0.303346	0.274309	18.8362	.	-1	-1
chr9	31406	31501	96	6	0.525973	0.933286	-0.407313	-18.8207	.	-1	-1
chr13	81934914	81935014	101	5	0.142371	0.570494	-0.428123	-18.8176	.	-1	-1
chr12	62845081	62845207	127	4	0.753595	0.208223	0.545372	18.807	.	-1	-1
chr17	24016391	24016517	127	5	0.733966	0.120271	0.613695	18.7385	.	-1	-1
chr20	7643908	7644069	162	6	0.15227	0.583992	-0.431722	-18.7286	.	-1	-1
chr12	36790967	36791053	87	6	0.792603	0.226532	0.566071	18.6397	.	-1	-1
chr21	8203846	8203918	73	5	0.258334	0.904549	-0.646215	-18.5518	.	-1	-1
chr18	20113867	20113956	90	4	0.781107	0.135842	0.645265	18.5446	.	-1	-1
chr8	104740217	104740315	99	5	0.953388	0.523918	0.42947	18.4556	.	-1	-1
chrX	62019188	62019289	102	6	0.912763	0.402736	0.510027	18.4503	.	-1	-1
chr18	16603962	16604073	112	6	0.912763	0.416243	0.49652	18.3757	.	-1	-1
chr9	105679403	105679481	79	6	0.6734	0.201778	0.471622	18.336	.	-1	-1
chr9	43929049	43929134	86	5	0.934972	0.35911	0.575862	18.3242	.	-1	-1
chr18	19445907	19446017	111	5	0.893357	0.476528	0.416829	18.2068	.	-1	-1
chr13	89568462	89568525	64	5	0.610257	0.121923	0.488334	18.1643	.	-1	-1
chr8	44306862	44306947	86	5	0.920941	0.346273	0.574668	18.1643	.	-1	-1
chr12	35484076	35484234	159	6	0.939774	0.549904	0.389869	18.1151	.	-1	-1
chrX	59243399	59243499	101	5	0.905949	0.261441	0.644509	18.0217	.	-1	-1
chrX	60740531	60740639	109	5	0.942512	0.352413	0.5901	17.8963	.	-1	-1
chrX	58823130	58823230	101	5	0.265109	0.906617	-0.641507	-17.8787	.	-1	-1
chr1	247682886	247682982	97	5	0.885677	0.312321	0.573356	17.845	.	-1	-1
chr9	63102243	63102318	76	4	0.119023	0.773043	-0.65402	-17.806	.	-1	-1
chrX	63150685	63150735	51	6	0.893468	0.393929	0.499539	17.7992	.	-1	-1
chr12	36248471	36248655	185	6	0.791557	0.370553	0.421004	17.7564	.	-1	-1
chr16	3065424	3065493	70	5	0.575725	0.124578	0.451147	17.7416	chr16	3065203	3065433
chr7	61131840	61132057	218	5	0.479696	0.0814765	0.398219	17.7312	.	-1	-1
chr1	39187469	39187528	60	4	0.861518	0.312242	0.549276	17.7112	.	-1	-1
chrX	61312843	61312982	140	4	0.334191	0.953404	-0.619213	-17.6632	.	-1	-1
chr11	34318561	34318612	52	4	0.879992	0.314355	0.565637	17.6492	.	-1	-1
chr7	83681305	83681378	74	4	0.851216	0.368298	0.482917	17.642	.	-1	-1
chr18	58263117	58263230	114	5	0.574553	0.132876	0.441676	17.6103	.	-1	-1
chr2	168404852	168404997	146	4	0.628052	0.164761	0.463292	17.5979	.	-1	-1
chrX	58981854	58981942	89	4	0.172648	0.894148	-0.7215	-17.5865	.	-1	-1
chr15	43798616	43798829	214	4	0.808653	0.317908	0.490746	17.5456	.	-1	-1
chr17	25876861	25876919	59	6	0.229927	0.772752	-0.542825	-17.5356	.	-1	-1
chr17	79021189	79021243	55	4	0.763755	0.256791	0.506964	17.4105	.	-1	-1
chrX	60999405	60999489	85	6	0.731643	0.192038	0.539605	17.3873	.	-1	-1
chr6	59544567	59544636	70	5	0.406639	0.883377	-0.476738	-17.3462	.	-1	-1
chr14	34258496	34258722	227	4	0.778628	0.289476	0.489152	17.3444	.	-1	-1
chr17	38701121	38701183	63	4	0.900183	0.419278	0.480905	17.3424	.	-1	-1
chr4	155629423	155629546	124	4	0.815468	0.306569	0.508898	17.2835	.	-1	-1
chr17	25934588	25934689	102	6	0.900783	0.444902	0.455881	17.2522	.	-1	-1
chr8	3198015	3198086	72	4	0.890653	0.347686	0.542967	17.2259	.	-1	-1
chr1	122165701	122165780	80	6	0.395812	0.894148	-0.498335	-17.1575	.	-1	-1
chr20	56146377	56146506	130	4	0.502097	0.0363986	0.465698	17.1214	.	-1	-1
chr3	91710060	91710117	58	5	0.367784	0.865247	-0.497463	-17.0717	.	-1	-1
chr16	21919000	21919075	76	4	0.874846	0.309973	0.564873	16.9157	.	-1	-1
chr18	15681932	15681991	60	5	0.618877	0.156673	0.462203	16.8826	.	-1	-1
chr7	40919040	40919254	215	4	0.803226	0.306978	0.496247	16.8644	.	-1	-1
chr18	17796423	17796537	115	5	0.182768	0.736113	-0.553345	-16.7712	.	-1	-1
chr9	42603057	42603196	140	4	0.810104	0.320098	0.490006	16.7439	.	-1	-1
chr17	24999743	24999994	252	4	0.959121	0.411542	0.547579	16.7031	.	-1	-1
chr11	53222730	53222901	172	5	0.975136	0.529257	0.445878	16.6532	.	-1	-1
chr20	20872735	20872937	203	5	0.867519	0.441048	0.426471	16.6484	chr20	20872567	20872788
chr15	21595311	21595384	74	5	0.905949	0.353845	0.552104	16.6446	.	-1	-1
chr12	94706573	94706632	60	4	0.649963	0.172314	0.477648	16.5052	chr12	94706462	94706639
chr3	92423100	92423682	583	7	0.480106	0.877369	-0.397263	-16.4557	.	-1	-1
chr6	10962662	10962801	140	4	0.937705	0.497797	0.439908	16.4415	.	-1	-1
chr16	37257747	37257837	91	5	0.326808	0.816488	-0.48968	-16.4314	.	-1	-1
chr2	128458505	128458565	61	4	0.619512	0.122326	0.497185	16.4242	.	-1	-1
chr7	41108354	41108460	107	5	0.677328	0.287758	0.389571	16.4078	.	-1	-1
chr14	47824325	47824377	53	4	0.629719	0.123809	0.50591	16.3903	.	-1	-1
chr18	16629549	16629638	90	4	0.962809	0.336013	0.626796	16.3725	.	-1	-1
chr2	184237010	184237788	779	4	0.613838	0.177784	0.436054	16.3609	.	-1	-1
chr8	45683594	45683693	100	5	0.776412	0.199848	0.576564	16.3509	.	-1	-1
chr2_KI270716v1_random	18594	18747	154	4	0.271067	0.813502	-0.542434	-16.3487	.	-1	-1
chr21	7987168	7987266	99	5	0.322426	0.785515	-0.463088	-16.2749	.	-1	-1
chr17	25986996	25987048	53	5	0.468361	0.862327	-0.393966	-16.1534	.	-1	-1
chr3	93483189	93483267	79	4	0.286122	0.918698	-0.632576	-15.9811	.	-1	-1
chr15	19014756	19014815	60	4	0.439178	0.961445	-0.522267	-15.9777	.	-1	-1
chr2	91706162	91706244	83	4	0.278173	0.833629	-0.555456	-15.9655	.	-1	-1
chr15	23137174	23137252	79	4	0.920007	0.340579	0.579429	15.9046	.	-1	-1
chr20	26658821	26658914	94	5	0.846465	0.403674	0.442791	15.8737	.	-1	-1
chr15	23223198	23223248	51	5	0.935961	0.472258	0.463703	15.8319	.	-1	-1
chr8	44463769	44463867	99	4	0.952944	0.336013	0.616931	15.7952	.	-1	-1
chr17	26243169	26243263	95	4	0.394284	0.950234	-0.555951	-15.772	.	-1	-1
chrY	19035603	19035699	97	5	0.164454	0.733752	-0.569298	-15.7318	.	-1	-1
chr8	58194131	58194233	103	4	0.929905	0.453843	0.476061	15.6737	.	-1	-1
chr18	17362308	17362393	86	4	0.853393	0.3704	0.482993	15.6395	.	-1	-1
chr4	9229539	9229600	62	5	0.138215	0.66963	-0.531415	-15.6362	.	-1	-1
chr10	110395957	110396123	167	4	0.564923	0.102433	0.46249	15.4705	chr10	110395828	110396091
chr17	25143415	25143513	99	4	0.920007	0.335368	0.584639	15.4417	.	-1	-1
chr12	24069526	24069767	242	4	0.434695	0.0566364	0.378059	15.4361	chr12	24069476	24069810
chr7	89588424	89588545	122	4	0.0753009	0.52257	-0.447269	-15.3831	.	-1	-1
chr18	20075678	20075791	114	4	0.952278	0.379188	0.57309	15.3106	.	-1	-1
chr3	92215969	92216069	101	5	0.369403	0.894148	-0.524745	-15.3075	.	-1	-1
chr3	93327515	93327572	58	4	0.743186	0.135842	0.607344	15.2736	.	-1	-1
chr9	73861391	73861469	79	4	0.98437	0.599901	0.384469	15.268	.	-1	-1
chr11	53345621	53345689	69	4	0.812897	0.268018	0.544879	15.1686	.	-1	-1
chr2	89561335	89561442	108	4	0.935961	0.360597	0.575363	15.1119	.	-1	-1
chr11	54393790	54393858	69	5	0.497642	0.929442	-0.431799	-15.1119	.	-1	-1
chrX	60278421	60278531	111	4	0.717615	0.135842	0.581773	15.0323	.	-1	-1
chr20	25767763	25767851	89	4	0.402705	0.880765	-0.47806	-14.996	.	-1	-1
chr9	21658296	21658503	208	4	0.136938	0.592828	-0.455889	-14.9219	.	-1	-1
chr8	45703465	45703590	126	4	0.14534	0.736354	-0.591014	-14.8612	.	-1	-1
chr4	81651070	81651158	89	4	0.781981	0.324753	0.457228	14.8121	.	-1	-1
chr18	20106005	20108191	2187	4	0.736524	0.336013	0.400512	14.798	.	-1	-1
chr14	45553053	45553297	245	4	0.252439	0.718731	-0.466292	-14.5969	.	-1	-1
chr8	2740796	2740848	53	4	0.835406	0.409759	0.425647	14.589	.	-1	-1
chr2	167476364	167476587	224	4	0.542743	0.137526	0.405216	14.5534	.	-1	-1
chr3	92849145	92849195	51	4	0.935961	0.336013	0.599948	14.5195	.	-1	-1
chr17	25673744	25673801	58	5	0.546326	0.924533	-0.378207	-14.4921	.	-1	-1
chr1	11169253	11169348	96	4	0.869468	0.371166	0.498302	14.4347	chr1	11169236	11169575
chr1	248764484	248764541	58	4	0.531548	0.0480058	0.483543	14.4168	.	-1	-1
chr3	91643361	91643418	58	4	0.935961	0.379786	0.556175	14.4079	.	-1	-1
chr14	68784532	68784626	95	4	0.815977	0.399077	0.4169	14.3812	.	-1	-1
chr1	245303962	245304018	57	4	0.605413	0.131312	0.474101	14.3532	.	-1	-1
chr17	168303	168357	55	4	0.893468	0.226532	0.666936	14.3424	.	-1	-1
chr3	93368752	93368851	100	4	0.893468	0.226532	0.666936	14.3424	.	-1	-1
chr3	93432897	93432997	101	4	0.840576	0.169839	0.670737	14.3244	.	-1	-1
chr5	70264922	70265020	99	4	0.941602	0.530424	0.411178	14.3119	.	-1	-1
chrUn_KI270379v1	205	445	241	5	0.683373	0.0867634	0.59661	14.2979	.	-1	-1
chr15	20583843	20583912	70	4	0.857698	0.365564	0.492134	14.2061	.	-1	-1
chr11	52248979	52249076	98	4	0.958454	0.513026	0.445427	14.1517	.	-1	-1
chr7	23507	23709	203	4	0.459441	0.953404	-0.493962	-14.114	.	-1	-1
chr11	52532713	52532779	67	4	0.773838	0.169839	0.604	14.1034	.	-1	-1
chr6	137870863	137870945	83	4	0.794648	0.371906	0.422742	14.0873	.	-1	-1
chr12	54934045	54934196	152	4	0.712208	0.221853	0.490354	14.074	.	-1	-1
chr6	46842790	46842902	113	4	0.707575	0.283229	0.424346	14.0487	.	-1	-1
chr16	38201165	38201265	101	4	0.670887	0.0880283	0.582859	14.0337	.	-1	-1
chr11	54152727	54152795	69	4	0.961697	0.577968	0.383729	14.0171	.	-1	-1
chr6	59336401	59336476	76	4	0.800524	0.305172	0.495352	13.9892	.	-1	-1
chr5	64566780	64566941	162	4	0.793287	0.397534	0.395753	13.9671	chr5	64566579	64567075
chr20	28030405	28030467	63	5	0.733966	0.199848	0.534118	13.9626	.	-1	-1
chr15	26522859	26522952	94	4	0.789466	0.297308	0.492158	13.9518	.	-1	-1
chr20	28224875	28224959	85	4	0.935961	0.410723	0.525238	13.9469	.	-1	-1
chr18	16742686	16742799	114	4	0.952502	0.52499	0.427512	13.9448	.	-1	-1
chr18	17666481	17666570	90	4	0.138215	0.736354	-0.598139	-13.9315	.	-1	-1
chr4	175677093	175677301	209	4	0.982243	0.569811	0.412432	13.9087	.	-1	-1
chr10	7300569	7300633	65	4	0.89914	0.529432	0.369708	13.9076	.	-1	-1
chr3	93292405	93292471	67	4	0.48166	0.920639	-0.438979	-13.9036	.	-1	-1
chr17	25972608	25972666	59	4	0.411515	0.936525	-0.52501	-13.8438	.	-1	-1
chr17	26414672	26414729	58	4	0.736524	0.135842	0.600682	13.8358	.	-1	-1
chr9	44347616	44347696	81	4	0.920007	0.336013	0.583995	13.8332	.	-1	-1
chr16	37623106	37623191	86	5	0.202989	0.732849	-0.529861	-13.8228	.	-1	-1
chr1	247809711	247809810	100	4	0.735688	0.138502	0.597186	13.8094	.	-1	-1
chr20	6799379	6799429	51	4	0.167762	0.65226	-0.484498	-13.8079	.	-1	-1
chr11	53112409	53112475	67	4	0.776763	0.174032	0.602731	13.8056	.	-1	-1
chr5	70943371	70943424	54	4	0.960444	0.624625	0.335819	13.7906	.	-1	-1
chr6	44263568	44263722	155	4	0.863203	0.492427	0.370776	13.7486	.	-1	-1
chrX	62216183	62216263	81	4	0.337652	0.920639	-0.582987	-13.6858	.	-1	-1
chr2	94076994	94077105	112	4	0.969576	0.593147	0.376428	13.6712	.	-1	-1
chrX	60415859	60415928	70	4	0.920007	0.336013	0.583995	13.6579	.	-1	-1
chr15	37351050	37351516	467	4	0.887614	0.487984	0.39963	13.6498	.	-1	-1
chr13	55959738	55959803	66	4	0.819368	0.409441	0.409927	13.6453	.	-1	-1
chr12	62848676	62848748	73	4	0.52621	0.0252611	0.500949	13.6374	chr12	62848559	62848778
chrY	11182375	11182471	97	4	0.665829	0.126861	0.538968	13.6271	.	-1	-1
chr3	5348117	5348173	57	4	0.119561	0.512387	-0.392826	-13.6085	.	-1	-1
chr17	23530002	23530081	80	4	0.287427	0.813215	-0.525788	-13.5612	.	-1	-1
chr4	145808491	145808614	124	4	0.507463	0.0915648	0.415898	13.2712	.	-1	-1
chr11	128415760	128415891	132	4	0.89727	0.5015	0.395771	13.2259	.	-1	-1
chr2	132083006	132083161	156	4	0.851838	0.41766	0.434178	13.2238	.	-1	-1
chr16	18267138	18267192	55	4	0.837691	0.46914	0.368551	13.2108	.	-1	-1
chrX	68901751	68901924	174	4	0.702905	0.264367	0.438538	13.0154	chrX	68901529	68901805
chr20	26899446	26899516	71	4	0.46658	0.936525	-0.469944	-12.9389	.	-1	-1
chr8	45741742	45742144	403	4	0.309806	0.860866	-0.55106	-12.8961	.	-1	-1
chr12	35635385	35635436	52	4	0.450749	0.909288	-0.458539	-12.8918	.	-1	-1
chr9	44403093	44403173	81	4	0.429688	0.903364	-0.473676	-12.8746	.	-1	-1
chrX	59720122	59720270	149	4	0.920007	0.385326	0.534681	12.8614	.	-1	-1
chr4	180966327	180966377	51	4	0.394979	0.903147	-0.508168	-12.857	.	-1	-1
chr16	67312007	67312067	61	4	0.646564	0.188872	0.457692	12.8147	.	-1	-1
chr14	98912863	98912984	122	4	0.390165	0.789375	-0.399209	-12.7305	.	-1	-1
chr18	20924902	20924979	78	4	0.893468	0.336013	0.557455	12.4927	.	-1	-1
chr8	44905788	44905847	60	4	0.46344	0.928326	-0.464886	-12.4412	.	-1	-1
chrX	61390384	61390484	101	4	0.67129	0.207359	0.463932	12.402	.	-1	-1
chr16	37963777	37963862	86	4	0.893468	0.336013	0.557455	12.3464	.	-1	-1
chr2_KI270715v1_random	133197	133281	85	4	0.17689	0.740713	-0.563822	-12.3177	.	-1	-1
chr7	158334989	158335081	93	4	0.172648	0.736354	-0.563706	-12.3097	.	-1	-1
chr20	27234058	27234143	86	4	0.736524	0.169839	0.566686	12.2159	.	-1	-1
chrX	62260587	62260662	76	4	0.328196	0.816139	-0.487943	-12.187	.	-1	-1
chr15	17388954	17389016	63	4	0.172648	0.736354	-0.563706	-12.0366	.	-1	-1
chr9	44621105	44621252	148	4	0.952106	0.534538	0.417569	12.0095	.	-1	-1
chr7	61243218	61243324	107	4	0.761908	0.310929	0.450979	12.0072	.	-1	-1
chr17	24778075	24778144	70	4	0.337652	0.85242	-0.514768	-11.914	.	-1	-1
chr8	2304660	2304749	90	4	0.15941	0.671609	-0.512199	-11.5714	.	-1	-1
chr3	93307950	93309479	1530	8	0.73983	0.501535	0.238295	11.4489	.	-1	-1
chr4	166759970	166761081	1112	7	0.577843	0.389371	0.188472	9.54603	.	-1	-1
chr3	92482035	92482724	690	8	0.736524	0.596075	0.140449	8.62911	.	-1	-1
chr16	36592221	36592911	691	10	0.696791	0.535526	0.161264	6.6567	.	-1	-1
chr17	26376592	26379387	2796	6	0.508121	0.536183	-0.0280619	-6.17329	.	-1	-1
chr18	17813111	17813379	269	5	0.784112	0.568957	0.215155	5.38665	.	-1	-1
chr2_KI270716v1_random	77447	77979	533	7	0.570165	0.674905	-0.10474	-5.36535	.	-1	-1
chr15	19527191	19529629	2439	7	0.485429	0.476773	0.00865596	4.03523	.	-1	-1
chr16	15210714	15211911	1198	5	0.515323	0.439164	0.0761591	3.4289	.	-1	-1
chr15_KI270727v1_random	78657	78958	302	4	0.39427	0.412383	-0.0181134	-0.751314	.	-1	-1

## Sheet: ChIP-seq
no	ChIP samples	Raw read pairs	uniquely mapped	Alignment rate (%)	duplication%	FRiP
	p65-TNF-0h	26556040	21616462	81.4	35.99	0.02
	p65-TNF-12h	22814943	15534230	68.09	29.78	0.27
1	p65-TNF-12d+withdraw-10d	27707614	22255049	80.32	38.38	0.02
2	p65-TNF-12d+withdraw-10d+TNF12h	20465607	16487710	80.56	25.96	0.22
Sample 41	non-treated control H3K27ac	23233071	19797687	85.21	21.76	37.97
Sample 42	12h-TNFa treatment H3K27ac	36987496	31406398	84.91	24.27	49.71
Sample 43	12d-TNFa treatment+withdraw-10d, H3K27ac	20521576	17182766	83.73	18.35	35.59
Sample 44	12d-TNFa treatment+withdraw-10d+12h TNFa, H3K27ac	23077377	19410525	84.11	17.74	56.15

## Sheet: readCounts_of_p65_peaks
chr	start	end	Normalzied_readCounts.1st_TNF_induction	Normalzied_readCounts.2nd_TNF_induction	log2ratio	log2mean
chr14	94345889	94346734	14.3218	15.1466	0.0807736	7.76106
chr14	35403718	35404304	14.3298	13.6079	-0.0745769	7.60732
chr5	1081925	1083415	5.86001	4.47747	-0.38822	4.71359
chr17	27695038	27695673	13.041	10.4611	-0.318022	7.09195
chr8	108942406	108942831	12.7164	9.90357	-0.360671	6.97657
chr17	27689459	27690334	5.82786	3.63227	-0.682096	4.40384
chr1	155124495	155124986	6.77586	8.80559	0.378016	5.89882
chr2	66170737	66171147	10.2051	8.13589	-0.326924	6.37553
chr6	31578311	31578751	8.41973	8.23192	-0.0325446	6.115
chr15	70140592	70141033	8.89479	7.40167	-0.26511	6.04081
chr5	174829297	174829905	6.16491	5.20382	-0.244509	5.00365
chrX	42161600	42161958	8.84675	9.83751	0.153145	6.44344
chr2	218892260	218892953	4.46536	4.68949	0.0706542	4.38821
chr6	52199887	52200469	5.69144	5.06731	-0.167574	4.85001
chr17	27686194	27686713	7.13811	4.9928	-0.515692	5.15539
chr1	93833246	93833667	7.52289	7.14119	-0.0751235	5.74745
chr14	35404576	35405217	5.89285	3.88619	-0.600609	4.51732
chr2	218896350	218896836	6.78578	5.65585	-0.262771	5.26226
chr6	137866907	137867486	5.87148	4.52487	-0.37585	4.7316
chr10	102627750	102628120	8.24571	7.58381	-0.12072	5.96657
chr11	27135876	27136341	6.7798	5.81892	-0.220494	5.30199
chr20	56520791	56521397	5.60988	4.13427	-0.440338	4.5356
chr8	140790755	140791181	8.11667	5.6459	-0.523685	5.51809
chr22	49962033	49962649	5.35372	4.04391	-0.40479	4.43629
chr10	121500804	121501218	7.26408	6.29367	-0.206877	5.51468
chr10	102394077	102394679	4.94729	4.32821	-0.19287	4.42041
chr19	40920980	40921594	4.80328	4.2203	-0.186675	4.34137
chr10	29254427	29254821	7.59594	6.43147	-0.24008	5.61038
chr8	17053225	17053671	7.10121	5.20012	-0.449519	5.20661
chr2	39790219	39790747	5.77824	4.47387	-0.369108	4.69215
chrX	40174063	40174515	7.07123	4.94105	-0.517142	5.12678
chr5	164327079	164327500	6.97075	5.67894	-0.295692	5.30694
chr6	8706563	8706903	8.67416	6.69501	-0.373638	5.85981
chr8	17052406	17052935	4.91595	4.84429	-0.0211847	4.57376
chr10	106652310	106652658	7.18058	7.61072	0.083932	5.77213
chr10	3126675	3126996	8.10137	7.76028	-0.062057	5.97427
chr5	78076269	78076635	7.22438	6.53234	-0.145275	5.56047
chrX	74179506	74179933	6.32842	5.39798	-0.229427	5.09427
chr6	52243148	52243679	5.93712	3.69368	-0.684704	4.45482
chr3	72973106	72973595	5.31808	4.8014	-0.147448	4.67436
chr17	72518989	72519358	7.16565	6.16885	-0.216096	5.4661
chr7	74284689	74285116	5.23966	5.69973	0.12142	4.90037
chr2	138426132	138426482	7.01502	6.2583	-0.164676	5.45622
chr3	23668331	23668877	4.60324	3.82819	-0.265988	4.13931
chr2	222423615	222424046	5.86519	4.7832	-0.294203	4.81015
chr6	30869271	30869821	4.62259	3.54005	-0.384933	4.03247
chr10	130117525	130117913	5.95355	5.46089	-0.124614	5.02288
chr11	56827186	56827706	4.24669	3.99207	-0.0892031	4.08348
chr8	48380339	48380781	4.93037	4.72894	-0.0601788	4.54321
chr17	7687393	7687695	6.15763	8.05889	0.388206	5.63296
chr21	18096400	18096764	7.58338	4.44437	-0.770861	5.07482
chr16	2963309	2963607	6.58155	7.3984	0.168786	5.60564
chr5	154482564	154482913	6.4107	5.33275	-0.265603	5.09536
chr4	128265509	128265882	6.23192	4.75933	-0.388916	4.89043
chr12	94606697	94607153	4.33296	4.48957	0.0512238	4.28193
chr17	43578749	43579145	5.06284	4.98904	-0.0211847	4.65871
chr12	13053579	13053959	5.27601	5.08608	-0.0528936	4.746
chr6	137873388	137873687	6.36518	6.7512	0.0849436	5.42535
chr5	77958148	77958495	6.7826	4.70336	-0.528145	4.99553
chr19	28590025	28590385	5.52877	5.28911	-0.0639344	4.86998
chr10	124006107	124006428	6.33627	5.79791	-0.1281	5.19917
chr2	65991214	65991715	4.61073	3.25762	-0.501178	3.90881
chr10	79520733	79521091	7.10175	4.07897	-0.79997	4.85638
chr5	151729559	151729959	4.68533	4.90336	0.0656201	4.52192
chr13	29743502	29743847	5.93759	5.1456	-0.20654	4.93322
chr10	3373218	3373947	3.10891	2.1995	-0.499232	2.77358
chrX	40109675	40110020	6.40081	4.73063	-0.436222	4.92029
chr7	155815334	155815618	7.26408	6.14999	-0.240194	5.48136
chr5	124655840	124656255	4.65601	4.41565	-0.0764671	4.36172
chrX	40100701	40101253	4.42161	2.59355	-0.769646	3.5195
chr1	198813739	198814221	4.15951	3.56424	-0.222819	3.89001
chr2	46642776	46643183	4.9617	4.15069	-0.257483	4.36419
chr2	56971407	56971885	5.44046	2.7255	-0.997206	3.89025
chr16	53384661	53385052	5.01611	4.32054	-0.215357	4.43778
chr17	34252500	34252846	5.20662	5.29623	0.024619	4.78531
chr10	21525946	21526257	6.02615	5.6621	-0.0898975	5.09257
chr8	72537582	72537976	5.45728	3.70627	-0.558213	4.33815
chr13	58949435	58950060	2.41748	3.29849	0.448301	2.99531
chr5	134284411	134284760	5.37001	4.75845	-0.174431	4.67542
chr6	22888129	22888503	5.01105	4.32554	-0.212233	4.43799
chr10	32219209	32219610	5.1084	3.67727	-0.474236	4.23151
chr18	44887207	44887612	5.27318	3.46421	-0.606147	4.1912
chr17	34235477	34235902	4.37554	3.77279	-0.21383	4.04509
chr2	172095394	172095722	4.96083	5.58688	0.17146	4.79263
chr6	41545580	41545977	5.34285	3.53402	-0.596299	4.23892
chr8	110798504	110798849	5.39016	4.48165	-0.266297	4.59436
chr1	204420533	204420960	4.04883	3.88923	-0.0580215	3.97699
chr6	108684718	108685047	5.25486	5.04772	-0.0580215	4.72929
chr4	81839505	81839961	3.88692	3.5477	-0.131743	3.78551
chr16	29288693	29289007	5.7835	5.01529	-0.205609	4.85828
chr1	30652235	30652552	6.14124	4.60653	-0.414849	4.82221
chr5	57173440	57173785	4.84272	4.77213	-0.0211847	4.53045
chr6	71407469	71407790	5.15953	5.17352	0.00390627	4.73839
chr19	49897640	49898019	3.21996	5.93053	0.881119	4.2552
chr8	72536643	72537087	3.63204	3.8048	0.0670425	3.7886
chr4	102718910	102719275	4.65697	4.31453	-0.11019	4.32859
chr5	87048994	87049353	3.88497	5.34372	0.459942	4.37575
chr5	143142566	143142915	5.32838	4.10211	-0.377329	4.45006
chr1	117760240	117760606	4.76333	4.10716	-0.21383	4.29011
chr7	152574864	152575436	2.81927	2.80321	-0.00824565	2.9824
chr7	8290765	8291215	4.74586	2.67239	-0.82854	3.6648
chr1	182614744	182615071	4.48729	5.2975	0.239467	4.57116
chr5	134262605	134262964	5.26089	3.74858	-0.488964	4.30165
chr10	111341412	111341773	4.46711	4.36233	-0.0342409	4.28444
chr1	145214842	145215241	4.40578	3.58806	-0.296192	3.9826
chr1	11169236	11169575	4.19988	5.15221	0.294843	4.43554
chr7	47528759	47529066	4.35371	5.96904	0.455253	4.69975
chr11	128999178	128999562	5.25889	3.13171	-0.747808	4.04171
chr21	34844598	34844880	5.3579	5.68594	0.0857305	4.92907
chrX	110320558	110320844	6.34972	4.65533	-0.44781	4.88557
chr1	211259040	211259348	5.2358	4.8341	-0.115161	4.66166
chr17	68290390	68290730	4.48664	4.58966	0.0327541	4.36402
chr21	44785670	44785998	3.80921	5.80512	0.607833	4.46682
chr8	55545124	55545485	3.8232	4.75891	0.31585	4.18541
chr13	93234084	93234419	5.24748	4.01713	-0.385459	4.39779
chr1	120340891	120341178	5.72014	4.98829	-0.197507	4.8346
chr5	84435863	84436308	3.3627	3.47454	0.0472023	3.54644
chr2	16400301	16400639	3.35265	6.01457	0.84316	4.33376
chr14	98903819	98904238	2.84322	4.61268	0.698079	3.71313
chr3	29393805	29394249	3.86109	2.9987	-0.364669	3.53334
chr1	244863321	244863580	5.94589	5.63811	-0.0766798	5.0671
chr5	112388740	112389096	4.04013	4.38339	0.117643	4.14645
chr20	45348382	45348679	4.64705	5.44697	0.229139	4.66177
chr12	41709609	41710209	2.61507	2.33834	-0.161362	2.61233
chr5	42036489	42036824	4.4235	4.31628	-0.0353986	4.25498
chr19	47227514	47227942	3.8357	3.0439	-0.333569	3.54541
chr21	8444779	8445016	9.13373	4.16806	-1.13183	5.25058
chr3	120831068	120831342	5.6734	5.01596	-0.177689	4.83074
chr14	93959360	93959698	3.52458	5.25216	0.57546	4.21036
chr1	219574564	219575000	3.93193	2.82387	-0.477563	3.47291
chr2	100365275	100365673	3.97882	3.34528	-0.25021	3.73447
chr14	22344219	22344545	4.50105	4.39153	-0.03554	4.30499
chr5	26846968	26847424	2.8674	3.5163	0.294317	3.3338
chr6	30882475	30882965	3.02423	2.86328	-0.0789002	3.11423
chr18	80049101	80049555	3.64804	2.74345	-0.411131	3.32311
chr21	8400535	8400801	8.08333	3.55218	-1.18624	4.84366
chr9	124010331	124010648	4.2622	4.74202	0.153902	4.3371
chrX	154955733	154956072	4.3713	3.96973	-0.139021	4.11711
chr5	174832115	174832427	4.93585	4.08384	-0.273372	4.33322
chr10	80239243	80239601	5.07268	2.99924	-0.75815	3.92735
chr3	10192166	10192419	5.97205	5.09278	-0.229771	4.92668
chr15	81940480	81941017	3.51706	1.91951	-0.873628	2.75511
chr3	55607813	55608142	4.54833	3.91633	-0.215832	4.15484
chr17	60160971	60161270	4.66456	4.59656	-0.0211847	4.4223
chr6	76495814	76496176	4.29423	3.36158	-0.353261	3.85154
chr20	57006721	57007139	3.23234	3.32222	0.0395693	3.42473
chr19	10219832	10220105	4.36377	5.7685	0.402623	4.65377
chr1	44730624	44730963	3.5999	4.51874	0.327965	4.02388
chr11	63581325	63581662	4.39725	3.7384	-0.234178	4.03902
chr2	158967897	158968408	2.98524	2.38139	-0.326039	2.82965
chr6	46842341	46842703	3.69224	3.83616	0.0551662	3.82416
chr1	148458789	148459107	4.52292	4.05181	-0.158688	4.19582
chr3	194134801	194135208	4.10501	2.7085	-0.599888	3.47488
chr2	186544338	186544659	4.43539	4.01394	-0.144041	4.15408
chr11	34234046	34234521	3.27266	2.47146	-0.4051	3.01583
chr17	48407252	48407558	4.84272	4.02356	-0.267345	4.28429
chr5	175378455	175378765	5.38948	3.50982	-0.618747	4.24154
chr1	243215406	243215724	4.15743	4.32193	0.0559831	4.16737
chr3	46065238	46065577	3.81418	4.13866	0.117792	3.98053
chrX	13599505	13599859	4.3092	3.35667	-0.360391	3.85445
chr2	184407054	184407430	4.25026	3.00796	-0.498764	3.67634
chr4	120948318	120948725	3.74805	2.88438	-0.377878	3.4344
chr9	111401437	111401749	4.93585	3.71675	-0.409255	4.19734
chr6	91299617	91299930	5.10574	3.56766	-0.517142	4.1871
chr1	149176768	149177054	3.96222	5.5063	0.474773	4.44739
chr1	108486087	108486381	4.10149	4.96691	0.276201	4.34849
chr7	55127726	55128050	4.61852	3.62328	-0.350133	4.06473
chrX	134718083	134718606	3.19453	1.9709	-0.69675	2.65445
chr21	41601719	41602214	2.55343	2.74759	0.105727	2.8106
chr6	11785610	11785932	5.23374	3.15672	-0.729419	4.04627
chr3	55623820	55624107	3.99904	5.13793	0.361535	4.36084
chrX	44664560	44664844	4.7063	4.43606	-0.085315	4.38387
chr21	8212974	8213156	5.4281	9.36071	0.78617	5.66707
chr17	9389118	9389392	4.08273	5.4862	0.426274	4.48534
chr6	168168568	168169025	2.70217	2.97605	0.13928	3.00752
chr1	210400145	210400455	3.79607	4.572	0.268322	4.11733
chrX	9462858	9463256	3.32176	3.16543	-0.0695477	3.39435
chr5	124935957	124936288	4.34528	3.46015	-0.328613	3.91028
chr12	75457931	75458234	2.97276	5.8116	0.967133	4.11074
chr17	76498213	76498496	5.2363	3.74351	-0.484157	4.29294
chr7	89583989	89584323	2.91433	4.8007	0.720081	3.80641
chr17	19063808	19064031	6.51487	4.81493	-0.436222	4.97125
chr2	64831350	64831612	4.26972	5.30034	0.311942	4.50023
chr1	24154978	24155401	3.05675	2.80912	-0.121879	3.10212
chr3	130408180	130408599	3.71005	2.35759	-0.654127	3.12875
chr21	37346912	37347198	5.18137	3.60412	-0.523685	4.22298
chr14	70947870	70948246	3.51612	3.04604	-0.207051	3.42092
chr8	8872165	8872513	3.84078	3.24998	-0.240966	3.64183
chr18	38940799	38941154	4.17429	2.86328	-0.543863	3.5792
chr7	27110748	27111069	4.88798	2.98815	-0.709983	3.86849
chr11	102317168	102317531	4.00225	2.83961	-0.495116	3.5065
chr13	75780072	75780382	4.03039	3.83309	-0.07241	3.94943
chr12	15186639	15186945	4.70028	3.36856	-0.480616	3.98488
chr10	89620299	89620630	3.55523	3.76292	0.0819088	3.74179
chr14	55601226	55601561	4.77044	2.73507	-0.802544	3.7057
chr1	51564193	51564425	5.19757	5.18352	-0.00390672	4.75177
chr3	10169163	10169485	3.97043	3.5124	-0.176836	3.80175
chr15	62135482	62135993	3.52542	1.56892	-1.16803	2.46757
chr7	43825443	43825706	4.14301	5.00801	0.273559	4.37492
chr2	36492339	36492772	2.91905	2.612	-0.160347	2.93065
chr5	77770374	77770651	4.72034	3.92796	-0.26511	4.21267
chr2	153663996	153664298	4.4258	3.50799	-0.335293	3.95658
chr14	68795547	68796012	2.62444	2.49382	-0.0736521	2.71037
chr5	64566579	64567075	2.4897	2.30909	-0.108648	2.5233
chr22	15815824	15816100	5.42174	3.42348	-0.663291	4.21422
chrX	68901529	68901805	4.31634	4.25342	-0.0211847	4.19843
chr11	15062715	15063490	1.04978	2.21673	1.07835	1.21851
chr15	65917115	65917419	4.06215	3.72037	-0.126795	3.91769
chr1	32431958	32432318	2.90563	3.6984	0.348049	3.42575
chr4	91267581	91267913	4.24467	2.97539	-0.512573	3.65873
chr16	20453708	20454027	4.55428	2.96201	-0.620647	3.7538
chr6	4336821	4337081	3.57616	5.67149	0.665316	4.34214
chr7	33729002	33729348	4.03093	2.81362	-0.518684	3.50354
chr18	77568192	77568500	4.38675	3.25372	-0.431061	3.83524
chr1	191813503	191813955	3.21419	2.05877	-0.642673	2.72624
chr8	70184240	70184554	4.11785	3.32833	-0.307094	3.77669
chr12	75706082	75706362	3.73581	4.60169	0.300743	4.10359
chr1	109910488	109910888	3.15987	2.64853	-0.254675	3.06506
chr1	150764898	150765192	4.74389	3.26258	-0.540058	3.95208
chr18	59847217	59847710	2.77007	1.97467	-0.488311	2.45154
chr21	43771682	43772114	3.19485	2.22036	-0.524951	2.82654
chr2	158994997	158995354	2.88935	3.52897	0.2885	3.34999
chr15	80776435	80776687	4.38151	4.6585	0.0884398	4.35129
chr4	185857668	185857951	4.31224	3.74351	-0.204049	4.01283
chr18	58191636	58191944	4.29241	3.16076	-0.441517	3.76206
chr12	10179830	10180126	3.87745	3.72419	-0.0581789	3.85203
chrX	41302403	41302731	3.49916	3.36086	-0.0581789	3.55584
chr15	99014829	99015361	2.75816	1.61463	-0.772506	2.15491
chr5	154141630	154142005	2.78941	3.20687	0.201208	3.16112
chr10	101454149	101454454	3.33433	4.03675	0.275797	3.75059
chr5	1889598	1889899	3.42691	3.99527	0.221386	3.7752
chr22	38218635	38218905	3.44371	4.9312	0.517974	4.0859
chr6	99501780	99502065	5.04662	3.01397	-0.743651	3.92699
chr7	92634992	92635244	4.61211	4.20402	-0.133659	4.2772
chr15	71251863	71252340	2.95436	1.83082	-0.69036	2.43533
chr6	21200562	21200815	3.67511	5.20596	0.502377	4.25795
chr14	19306456	19306776	5.03945	2.37115	-1.08768	3.57885
chr19	12793556	12793893	3.31949	3.22862	-0.0400437	3.42188
chr21	45104566	45104842	3.89523	4.0978	0.0731427	3.99656
chr10	30433852	30434128	3.94787	3.99406	0.0167831	3.97893
chr15	92665337	92665676	3.38562	3.08288	-0.135141	3.3837
chr1	26620528	26620966	2.71988	2.28801	-0.249454	2.63764
chr1	50977039	50977345	2.94361	4.30427	0.548181	3.66336
chr7	28530910	28531228	4.34017	2.7012	-0.68415	3.55135
chr1	149608098	149608338	4.23738	4.83178	0.189382	4.35573
chr17	73166892	73167194	4.61822	2.79691	-0.723504	3.69117
chr18	35497934	35498226	3.43302	4.02035	0.227843	3.7868
chr13	58948213	58948524	3.36343	3.5906	0.0942925	3.59416
chr8	127668185	127668539	2.62656	3.51843	0.421759	3.20811
chr19	17931753	17931984	4.21379	5.14398	0.287766	4.438
chr5	172397087	172397385	3.60766	3.60312	-0.00181939	3.70031
chr17	56653961	56654243	3.96691	3.65525	-0.118046	3.85798
chr13	52309863	52310153	4.45864	3.06074	-0.542722	3.77049
chr2	218805651	218805934	4.26091	3.3388	-0.35183	3.83049
chr21	8442093	8442260	4.52374	9.00132	0.992621	5.34765
chr2	99181022	99181255	3.74116	5.59138	0.579719	4.38669
chr13	29488125	29488400	4.17354	3.54005	-0.237503	3.88504
chr6	142885256	142885625	2.91351	2.79344	-0.0607131	3.0248
chr19	47231240	47231495	4.72877	3.59313	-0.396224	4.08671
chr10	88994143	88994438	3.34886	3.78535	0.176755	3.6641
chr3	79052154	79052476	3.06806	3.46794	0.176755	3.41141
chr6	150141184	150141472	3.32937	3.97677	0.256349	3.72685
chr5	59303323	59303633	4.17099	2.72473	-0.614275	3.5065
chr4	102501118	102501427	3.85537	2.9652	-0.378737	3.515
chr14	76486248	76486671	2.6446	2.30145	-0.200508	2.6056
chr14	75540126	75540463	2.88839	3.31358	0.198128	3.25866
chr13	65236952	65237306	3.03696	2.83092	-0.101355	3.1039
chrX	69027699	69028003	3.58425	3.24944	-0.141479	3.54186
chr5	179818984	179819306	2.97782	3.46794	0.219823	3.36834
chr16	31265398	31265698	3.48676	3.38821	-0.0413626	3.56241
chr5	168289948	168290168	4.0943	5.3361	0.382171	4.4494
chr8	11466469	11466733	3.90719	3.85024	-0.0211847	3.91108
chr9	3513422	3513744	3.60948	2.80103	-0.365833	3.33775
chr1	33342437	33342689	3.86264	4.26083	0.141545	4.04072
chr1	170592518	170592926	3.16913	1.96499	-0.689563	2.63861
chr6	150403525	150403806	4.60144	2.85309	-0.689563	3.71461
chr5	122561369	122561833	2.47354	1.94382	-0.347686	2.26547
chr10	103135293	103135547	4.17541	3.83273	-0.123546	4.00029
chr14	77033919	77034161	4.38246	4.02278	-0.123546	4.13994
chr14	19093276	19093519	5.56016	3.1225	-0.832423	4.11783
chr1	205294451	205294852	2.31871	2.74903	0.245602	2.67224
chr1	85240199	85240471	3.84569	3.57909	-0.103647	3.78284
chr17	59093977	59094232	4.10207	3.8177	-0.103647	3.96906
chr12	24069476	24069810	3.4798	2.61467	-0.412375	3.18563
chr7	58770003	58770174	7.81632	4.43724	-0.816826	5.11615
chr15	91953526	91953806	3.89147	3.32345	-0.227636	3.69299
chr19	6661791	6662103	3.53891	2.93669	-0.269112	3.3775
chr13	54465515	54465856	4.21785	2.05719	-1.03583	3.11718
chr17	15645605	15645844	4.68062	3.77377	-0.310691	4.14271
chr10	77287824	77288131	3.64387	2.89126	-0.333775	3.39717
chr12	7991579	7991824	4.1509	3.97353	-0.0630049	4.04384
chr6	29561088	29561390	3.51177	3.08134	-0.188641	3.43576
chrX	10691819	10692154	3.42604	2.56413	-0.418075	3.13501
chr1	111192793	111193253	2.33714	1.99184	-0.230638	2.21885
chr12	75591733	75591993	3.18502	4.57023	0.520965	3.86357
chr4	24471059	24471350	3.04542	3.78818	0.314864	3.52815
chr3	130596536	130596825	3.82055	3.0218	-0.338375	3.52919
chr6	33314038	33314568	2.08328	1.64773	-0.338375	1.77934
chrX	107593344	107593629	3.46637	3.41584	-0.0211847	3.56566
chr11	115126503	115126764	3.72945	3.78479	0.0212506	3.81918
chr9	136902460	136902730	3.49752	3.76468	0.106195	3.71886
chr7	40986540	40986807	3.4824	3.8606	0.14874	3.74891
chr2	76930088	76930331	3.76656	4.30081	0.19136	4.01785
chr1	214044579	214044899	2.76943	3.3554	0.276897	3.21607
chr18	43671515	43671755	3.69257	4.47387	0.276897	4.04615
chr8	122970600	122970893	3.37172	3.22485	-0.0642534	3.44272
chr22	35257310	35257556	4.90178	3.14262	-0.641337	3.94527
chr6	17705899	17706179	2.80186	4.24378	0.598967	3.57174
chr6	113630446	113630719	4.25733	2.93669	-0.535758	3.64414
chr7	155408924	155409244	3.63204	2.50537	-0.535758	3.1858
chr8	126501033	126501308	3.90939	3.12357	-0.323747	3.61014
chr17	48873291	48873567	4.47425	2.69729	-0.730136	3.59316
chr14	45281854	45282177	3.14852	2.79236	-0.173188	3.13616
chr9	13979693	13979952	3.3656	4.03512	0.261749	3.76347
chr10	95552706	95552921	3.78408	5.19385	0.456863	4.29675
chr12	56882375	56882675	3.29305	3.05416	-0.108648	3.3302
chr5	87029875	87030168	3.47089	3.0294	-0.196271	3.39434
chr15	86465561	86465897	3.32937	2.38606	-0.480616	2.98988
chr11	72814105	72814472	2.53352	2.61362	0.0449045	2.72719
chr9	129173831	129174188	2.84866	2.44622	-0.21973	2.80083
chr7	27098879	27099169	3.00582	3.50504	0.221672	3.39719
chr19	45642431	45642730	4.42161	2.20252	-1.00542	3.28373
chr16	29811297	29811640	3.092	2.37911	-0.378119	2.87896
chr11	125514303	125514569	3.27703	3.71365	0.180449	3.60522
chr5	151080994	151081247	2.9286	4.5835	0.64624	3.74666
chr5	122723778	122724092	3.28503	2.64443	-0.312951	3.11886
chr6	30744526	30744847	3.21339	2.58676	-0.312951	3.05524
chr3	125698076	125698344	2.54785	4.64748	0.86717	3.56573
chr16	88262681	88263000	3.41571	2.42346	-0.495116	3.04926
chr11	10884325	10884622	3.17956	2.9886	-0.0893562	3.2483
chr6	10419065	10419254	5.84201	4.01465	-0.541192	4.55174
chr6	10355397	10355681	2.71124	3.73032	0.460348	3.33825
chr5	170803034	170803298	3.90719	2.98258	-0.389572	3.54269
chr5	10508760	10508927	5.65467	5.14361	-0.136662	4.86222
chr21	33403194	33403457	4.03253	2.88505	-0.483089	3.54028
chr1	183180811	183181059	4.15927	3.11728	-0.416044	3.69662
chr10	98647282	98647546	3.90719	2.92835	-0.416044	3.51622
chr11	106988354	106988655	2.79944	3.13914	0.165228	3.13551
chr1	100622092	100622338	3.95685	3.31721	-0.254384	3.71432
chr17	80155596	80155893	3.57089	2.50657	-0.51057	3.162
chr1	183139651	183139914	4.75065	2.39514	-0.988018	3.50823
chr10	79331803	79332051	3.57346	3.57909	0.00227426	3.67692
chr17	868138	868440	2.9826	2.89172	-0.0446437	3.1085
chr1	198778243	198778498	3.07655	3.92999	0.353211	3.59584
chr8	102788995	102789214	4.44469	3.66081	-0.279919	4.02424
chrX	127968195	127968522	3.06557	2.36417	-0.374822	2.85749
chrX	69324920	69325160	3.75311	3.57909	-0.0684904	3.74768
chr8	143041067	143041325	3.26602	3.55135	0.120834	3.5359
chr15	74200503	74200748	3.32072	3.85666	0.215854	3.67885
chr12	5222004	5222273	2.64639	3.99156	0.592924	3.40098
chr8	102806753	102807116	3.12175	1.85364	-0.751998	2.53271
chr18	58230908	58231180	3.36498	3.05276	-0.140484	3.36071
chr4	78252804	78253125	1.9914	3.65714	0.876936	2.8645
chr15	56040592	56040844	3.05552	3.86315	0.338358	3.5612
chr17	18719248	18719488	3.69257	3.51944	-0.069279	3.69997
chr5	93677414	93677648	3.78725	3.60969	-0.069279	3.77303
chr7	37944528	37944950	2.03119	2.06943	0.0269096	2.07156
chr8	38985417	38985681	2.86161	3.74178	0.3869	3.42055
chr5	59329103	59329423	3.67744	1.9685	-0.901603	2.8558
chr10	97714291	97714520	3.86994	3.62598	-0.0939411	3.81068
chr7	128476467	128476756	2.91568	3.0218	0.0515716	3.13924
chr8	23074703	23074948	4.0323	3.03858	-0.408208	3.615
chr4	112073317	112073641	1.88328	3.66747	0.961537	2.78803
chr8	127640740	127640984	3.45341	3.52042	0.0277249	3.60377
chrX	40104634	40104931	2.93498	2.79579	-0.0700943	3.03661
chr13	112659122	112659392	3.65894	2.7042	-0.436222	3.30663
chr14	103260570	103261007	2.32716	1.60527	-0.535758	1.90139
chr10	130108147	130108423	2.8951	3.216	0.151652	3.21888
chr3	156161372	156161658	3.45425	2.50286	-0.464791	3.11195
chr10	58256237	58256563	2.85215	2.32751	-0.293264	2.73084
chr5	92795518	92795849	2.85296	2.2491	-0.343113	2.68181
chrX	123819588	123819854	2.78547	3.55218	0.350784	3.30663
chr18	31268172	31268430	3.32233	3.16292	-0.0709377	3.39345
chr6	157461030	157461272	2.88162	4.1411	0.523136	3.57689
chr4	141855579	141855854	3.16978	2.91534	-0.12072	3.20804
chr2	31783587	31783898	3.12986	2.30167	-0.443418	2.84878
chr4	158821488	158821762	3.39344	2.71698	-0.320745	3.20475
chr1	23117017	23117241	3.37261	4.09039	0.278376	3.7861
chr8	37566801	37567092	2.5961	3.14862	0.278376	3.03106
chr10	23274212	23274454	3.06172	3.84531	0.328758	3.55744
chr10	110395828	110396091	3.31441	2.99392	-0.146716	3.31079
chr17	7351724	7351932	4.33051	3.64792	-0.247461	3.98161
chr17	48871663	48871952	4.02163	2.03104	-0.985561	3.03
chr15	76309684	76309911	3.32804	3.97327	0.255655	3.725
chr7	46206493	46206984	1.39068	2.01187	0.532751	1.48433
chr12	101877135	101877392	3.39179	3.00811	-0.173188	3.3509
chr9	137302449	137302744	3.25037	2.37797	-0.450869	2.95034
chr4	121072165	121072468	2.06175	3.49641	0.762004	2.84974
chr15	31077170	31077447	2.77975	3.10102	0.157785	3.1077
chr19	12788682	12788940	3.37864	2.94096	-0.200155	3.31273
chr14	36798177	36798484	2.46079	2.84462	0.209113	2.80736
chr7	96599825	96600089	3.63204	2.60298	-0.480616	3.24094
chr22	46545427	46545634	3.5794	4.288	0.260586	3.94002
chr16	30567282	30567527	2.90563	3.73979	0.364105	3.44181
chr3	109082013	109082271	3.20971	3.05194	-0.072715	3.29217
chr3	135957262	135957474	3.90615	3.71415	-0.072715	3.85878
chr7	123190214	123190459	3.20212	3.38918	0.0819088	3.43997
chr21	44170932	44171188	2.61053	3.80279	0.542716	3.3114
chr5	134554820	134555083	4.30873	2.1774	-0.984659	3.22987
chr2	64204267	64204553	3.04786	2.60298	-0.227636	2.98796
chr8	124759920	124760461	2.44374	0.899735	-1.44152	1.13666
chr10	14009619	14009863	3.27479	3.28573	0.0048105	3.42761
chr13	112125623	112125866	3.16869	3.41708	0.108876	3.43665
chr1	109892568	109892820	3.57439	2.78374	-0.360671	3.31472
chr12	62602856	62603257	2.28248	1.71368	-0.413502	1.9677
chr5	142223772	142224001	3.42585	3.50095	0.0312827	3.58421
chr12	58953983	58954295	2.60762	2.47783	-0.0736521	2.69181
chr3	5026593	5026830	3.43281	3.26196	-0.0736521	3.48513
chr5	14036037	14036316	2.96812	2.7196	-0.126154	3.01294
chr8	47729955	47730230	2.74714	3.01945	0.136357	3.05222
chr15	82165984	82166213	3.67962	3.25088	-0.178726	3.58039
chr22	23182557	23182797	3.0267	3.57909	0.24185	3.43734
chrX	136072456	136072718	3.38251	2.67749	-0.337212	3.17898
chr17	29149575	29149868	2.38004	3.0294	0.348049	2.85002
chr5	177537799	177538052	2.75633	3.50836	0.348049	3.27355
chr7	26156394	26156654	2.68212	3.41391	0.348049	3.1948
chr5	59209918	59210148	3.41096	3.42348	0.0052875	3.54564
chr2	207529549	207529751	4.17145	3.61453	-0.20674	3.91436
chr2	64727906	64728219	2.78495	2.24122	-0.313365	2.64194
chr2	101596354	101596596	3.60202	2.89877	-0.313365	3.38425
chrX	107729626	107729869	3.16869	3.24033	0.0322545	3.36003
chr16	20573860	20574144	2.81355	2.67172	-0.074624	2.91016
chr9	123996705	123996927	3.07578	3.99827	0.378423	3.62033
chr16	14317472	14317718	3.07099	3.25901	0.0857305	3.32314
chr15	92642446	92642734	3.32937	2.18722	-0.606147	2.86435
chr3	87333210	87333572	2.64878	1.74011	-0.606147	2.20451
chr7	135170712	135171000	3.22848	2.23693	-0.529332	2.85238
chr4	171985278	171985529	3.47287	2.73779	-0.343113	3.24914
chr6	30742701	30743019	2.74116	2.16096	-0.343113	2.56646
chr2	38438956	38439197	3.25527	3.14842	-0.0481518	3.3574
chr6	44735624	44735918	3.36025	2.0452	-0.71633	2.78081
chr18	59455310	59455515	4.03954	3.4918	-0.210219	3.81816
chr11	27998518	27998844	2.62933	2.10793	-0.318865	2.47052
chr1	19550292	19550596	2.24613	2.8256	0.331117	2.666
chrX	74506548	74506792	3.21525	3.05103	-0.0756325	3.29423
chr15	92663192	92663505	2.55287	2.3327	-0.130119	2.57412
chr16	22899638	22899879	3.31555	3.02961	-0.130119	3.32838
chr8	143431516	143431709	4.2907	3.63473	-0.239365	3.96306
chr10	61815559	61815782	2.6711	4.36553	0.708726	3.54359
chrX	27115808	27116114	2.7537	2.24571	-0.294203	2.62854
chr1	84287592	84287828	3.20112	3.21512	0.00629603	3.36345
chr2	219126706	219126978	2.83085	2.73695	-0.0486654	2.95381
chr9	95581985	95582230	3.02423	3.15545	0.0612774	3.25441
chr12	23859275	23859568	2.77671	2.39421	-0.21383	2.73293
chr17	60030848	60031084	3.44736	2.97247	-0.21383	3.35715
chr8	42020318	42020552	4.0356	2.56961	-0.651235	3.37433
chr6	168286991	168287193	3.16455	4.39414	0.47358	3.79758
chr7	158173531	158173772	3.79782	2.55437	-0.5722	3.27814
chr8	17113037	17113281	2.56029	3.69644	0.52983	3.24244
chr21	44172744	44172983	3.16094	3.11486	-0.0211847	3.29952
chr2	180467786	180468086	2.61507	2.38606	-0.132216	2.64148
chr10	3835822	3836077	4.04509	2.13342	-0.923004	3.10934
chr8	22392501	22392792	2.44632	2.70584	0.145465	2.72669
chr2	64699825	64700051	3.53561	3.10399	-0.187835	3.45609
chr1	46238921	46239151	4.04262	2.6143	-0.628867	3.40171
chr3	78849001	78849230	3.55274	3.00081	-0.243577	3.41428
chr19	4831729	4831972	2.80997	3.35816	0.257116	3.23823
chr6	132320107	132320326	3.05158	3.79155	0.313234	3.53234
chr20	45359782	45360019	3.55541	2.77871	-0.355604	3.30443
chr6	33101210	33101454	3.51296	2.64032	-0.411975	3.2134
chr3	177197081	177197253	5.32136	3.49586	-0.606147	4.21744
chr1	230005148	230005392	3.21525	2.87501	-0.161362	3.2085
chr1	24562707	24562948	3.61697	2.61378	-0.468644	3.24092
chr1	3403779	3404036	3.16567	2.61817	-0.273951	3.05107
chr12	2911922	2912135	3.81961	3.15901	-0.273951	3.5929
chr10	127346743	127346943	3.77732	3.57909	-0.0777682	3.75696
chr1	232844873	232845082	3.19758	3.83597	0.262608	3.61657
chr5	111518030	111518239	3.89271	3.15097	-0.304978	3.61657
chr17	43671108	43671405	3.47306	1.73532	-1.00101	2.59141
chr3	101827649	101827907	2.75922	2.88547	0.0645452	2.99307
chr6	10423380	10423647	3.37358	2.1984	-0.617829	2.89073
chr7	155496312	155496557	4.56599	1.92833	-1.24358	3.13828
chr17	60115435	60115778	2.28723	1.96172	-0.221483	2.16572
chr10	121503644	121503893	3.44241	2.47231	-0.477563	3.08928
chr1	206469514	206469761	3.23501	2.66621	-0.278982	3.10856
chr8	103626854	103627135	2.27487	2.90403	0.352274	2.72384
chr7	33734219	33734465	4.48837	1.92049	-1.22472	3.10767
chr5	143806637	143806875	3.7236	2.46627	-0.59437	3.19903
chr12	111404573	111404801	3.05856	3.26514	0.0942925	3.32
chr3	125742921	125743161	2.90563	3.10188	0.0942925	3.172
chr4	112284974	112285254	3.32072	1.99407	-0.735782	2.72721
chr2	38201975	38202228	2.23952	3.62153	0.693413	3.01979
chr1	199226210	199226494	2.40431	2.67172	0.152147	2.68339
chr9	124102071	124102296	2.9702	3.43593	0.210141	3.35126
chr6	77561924	77562211	2.73352	2.29461	-0.25251	2.64901
chr7	70668623	70668896	2.8737	2.41228	-0.25251	2.79331
chr2	66171602	66171850	4.27643	1.96273	-1.12355	3.06927
chr6	128507814	128508031	3.95005	2.77091	-0.51151	3.45223
chr16	3065203	3065433	2.84246	3.42348	0.268322	3.28261
chr1	206481245	206481490	3.32072	2.5711	-0.369108	3.09388
chr1	117897599	117897879	2.54243	2.5565	0.00796163	2.70037
chr12	26113981	26114199	3.19886	3.34924	0.0662781	3.42139
chr2	104852450	104852729	3.17641	2.05253	-0.629994	2.7048
chr5	151087099	151087350	3.3571	2.39557	-0.486848	3.00759
chr12	45727520	45727769	3.73414	2.18483	-0.773257	3.0283
chr13	29674706	29674994	2.77447	2.18722	-0.343113	2.60132
chr4	73740360	73740586	3.53561	2.78726	-0.343113	3.30081
chr22	42437970	42438162	3.63204	3.72822	0.037709	3.75927
chr9	90226876	90227100	2.59431	3.83474	0.563778	3.31448
chr3	125720328	125720545	3.4814	3.03481	-0.198062	3.40127
chr6	168247513	168247735	2.9449	3.41787	0.214883	3.33132
chr6	21948247	21948556	3.29117	1.57526	-1.063	2.37419
chr13	50800489	50800770	2.79189	2.24171	-0.316641	2.64584
chr8	7248579	7248808	2.41079	3.87605	0.685084	3.22409
chr5	173144334	173144537	3.43523	3.45568	0.00856263	3.56937
chr8	76641483	76641728	2.78703	2.92171	0.0680826	3.02554
chr2	172525736	172525988	2.94022	2.61331	-0.170048	2.9418
chr2	64768457	64768762	1.95296	2.67552	0.454153	2.38549
chr1	37663467	37663715	3.10481	2.54	-0.289674	2.97933
chr10	44973574	44973823	4.66768	1.66737	-1.48513	2.96028
chr17	28887914	28888158	3.45341	2.34695	-0.557238	3.01881
chr2	238077392	238077648	2.78078	2.6284	-0.0813057	2.86967
chr6	12013125	12013348	3.19228	3.01735	-0.0813057	3.26787
chr10	14049272	14049561	2.81514	2.03104	-0.470988	2.51543
chr22	30196189	30196424	3.21474	2.68051	-0.262193	3.10721
chr10	90666427	90666635	3.2828	3.30378	0.00918894	3.43905
chr16	29469877	29470132	3.13352	2.30185	-0.444992	2.85058
chr17	75877194	75877434	3.32937	2.44571	-0.444992	3.0255
chr11	7677151	7677392	2.71273	2.9702	0.130818	3.0103
chr10	72173863	72174066	4.22247	2.67991	-0.6559	3.50027
chr5	1783176	1783391	2.83806	3.52915	0.314418	3.32423
chr17	43656653	43656925	2.45697	2.52642	0.0402158	2.63397
chr8	37329574	37329754	3.95489	3.57909	-0.144041	3.82323
chr12	78312794	78313121	1.95486	2.18905	0.16324	2.09737
chr14	94599086	94599350	2.20124	2.98258	0.438247	2.71487
chr1	148679748	148679940	3.2537	3.80279	0.224976	3.62914
chr21	5089025	5089242	2.87885	3.36468	0.224976	3.27596
chr9	112030051	112030314	1.54672	4.24592	1.45686	2.71529
chr8	42270888	42271120	3.25631	2.59176	-0.329307	3.07717
chr10	68871380	68871560	3.14777	4.45398	0.500768	3.80943
chr1	156165175	156165390	3.9868	2.46375	-0.694374	3.29608
chr7	27606437	27606657	4.22637	2.21253	-0.933722	3.22512
chr8	58196037	58196293	3.23478	2.12509	-0.606147	2.78119
chr6	21954631	21954835	3.20474	3.36856	0.0719247	3.43234
chr3	23162101	23162466	1.91055	1.76503	-0.114294	1.75368
chr21	30710607	30710839	3.06845	2.71518	-0.176463	3.05855
chr5	132490827	132491102	2.58865	2.29062	-0.176463	2.56794
chr7	133389809	133390021	3.35792	2.97132	-0.176463	3.31867
chr18	34222364	34222591	3.20003	2.71191	-0.238776	3.1174
chr3	78981709	78981953	2.97708	2.52297	-0.238776	2.90902
chr1	149390454	149390643	3.30535	3.7874	0.196407	3.64601
chr3	157160751	157160937	3.98353	3.23273	-0.301293	3.6868
chr10	36725691	36725907	2.95944	3.18142	0.104346	3.23499
chr3	157370079	157370306	3.07203	2.77498	-0.146716	3.09167
chr8	54328270	54328529	2.69248	2.43213	-0.146716	2.71115
chr10	3853848	3854126	2.61298	2.16291	-0.272723	2.49867
chr6	69867154	69867447	2.52879	2.00332	-0.336058	2.34084
chr14	102777367	102777618	2.08372	3.30817	0.666871	2.78519
chr1	67700754	67701014	2.2351	2.86328	0.357327	2.67801
chr6	13873411	13873616	3.25998	3.14262	-0.0528936	3.35683
chr1	92723811	92724084	2.07545	2.77937	0.421334	2.52818
chr5	31638919	31639130	2.6853	3.59606	0.421334	3.2715
chr8	90858855	90859198	2.49901	1.46085	-0.774545	1.86817
chr18	63970531	63970764	2.99292	2.64208	-0.179882	2.98323
chr21	18245761	18245995	2.35927	3.30378	0.485775	2.96246
chr1	14617756	14618091	1.21429	3.11969	1.36128	1.92152
chr15	70122398	70122660	3.0498	2.02178	-0.593091	2.62434
chr15	62125891	62126120	3.0452	2.62571	-0.21383	2.99925
chr17	48491687	48491888	3.61397	2.84903	-0.343113	3.36406
chr2	106107593	106107838	3.20212	2.16207	-0.566619	2.79144
chrX	86171415	86171670	1.76617	3.59313	1.02462	2.66586
chr10	7363136	7363402	3.00394	1.93756	-0.632619	2.54109
chr1	146228994	146229208	4.07331	2.20767	-0.883681	3.16872
chr2	218324078	218324396	2.10156	1.93586	-0.118482	2.02443
chr8	7590748	7590991	2.57083	2.7101	0.0761125	2.80058
chr17	41676425	41676614	3.99716	2.87843	-0.473697	3.52426
chr15	80419700	80419894	2.54617	4.28015	0.749333	3.44599
chr2	142142679	142142903	3.17803	2.5565	-0.313966	3.0223
chr2	185160511	185160730	3.25059	2.61486	-0.313966	3.08744
chr5	50667699	50667928	3.10864	2.50068	-0.313966	2.9586
chr9	111511639	111511868	2.41079	3.18836	0.403313	2.94232
chr6	68085706	68085878	4.81456	2.82998	-0.766612	3.7682
chr1	156054088	156054303	3.04078	2.86328	-0.0867731	3.12211
chr6	158040419	158040679	2.51449	2.36771	-0.0867731	2.57376
chr6	14117635	14117861	2.69992	2.91395	0.11006	2.9759
chr8	140956079	140956241	3.67688	4.15352	0.175852	3.93282
chr11	126339481	126339692	3.78696	2.37475	-0.673261	3.16882
chr17	34238793	34239087	2.37194	1.94781	-0.284219	2.20792
chr6	75157428	75157681	2.75633	2.26346	-0.284219	2.64128
chr7	129953137	129953395	2.25243	2.66351	0.24185	2.58481
chr8	141406162	141406381	3.25059	2.54949	-0.350492	3.05091
chr17	48111795	48112051	2.04302	2.96394	0.536811	2.59822
chr8	117955322	117955586	3.08173	1.84378	-0.741077	2.5064
chr1	93672201	93672401	3.63204	2.72011	-0.417113	3.30445
chr4	131496232	131496497	2.08328	2.7012	0.374744	2.49246
chr6	11806634	11806810	3.13676	4.06715	0.374744	3.67329
chr1	39845644	39845858	2.9871	2.87666	-0.0543516	3.10314
chr7	55065216	55065380	3.80921	3.84098	0.0119822	3.87097
chr15	85164877	85165079	2.15765	4.46501	1.0492	3.26812
chr3	45204248	45204436	2.70471	4.11215	0.60442	3.47537
chr12	31192769	31193016	3.1762	2.02864	-0.646789	2.68781
chr14	21069621	21069834	2.86471	3.02459	0.078351	3.11513
chr5	10563689	10563929	3.08723	2.20711	-0.484157	2.76847
chr6	44219615	44219796	3.69224	3.24294	-0.187195	3.5818
chr3	69297633	69297896	2.87249	1.95966	-0.551699	2.4929
chr14	72154701	72154995	1.77896	2.53215	0.50933	2.17139
chr17	1111233	1111472	2.18834	3.11486	0.50933	2.76901
chr1	193498192	193498415	3.58318	2.18277	-0.715082	2.9674
chr5	94478395	94478597	2.30149	4.11064	0.836796	3.24193
chr10	120981736	120981929	3.9896	2.59623	-0.619822	3.37266
chr1	7940809	7941056	2.17628	2.89805	0.413218	2.65695
chr15	73362953	73363216	1.54672	3.5927	1.21585	2.47429
chr1	41100213	41100431	2.73236	2.95522	0.113116	3.01341
chr10	124095258	124095483	3.29305	2.29062	-0.523685	2.91516
chr11	102794520	102794710	2.7527	3.84282	0.481316	3.40301
chr5	125668977	125669222	3.85441	1.63616	-1.2362	2.65682
chr11	35621772	35621994	2.68313	2.83748	0.0806949	2.92853
chr1	172476190	172476422	2.81796	2.46834	-0.19111	2.79819
chr4	63169935	63170161	2.89277	2.53387	-0.19111	2.8738
chr2	37417413	37417659	2.12607	2.90983	0.452746	2.62913
chr14	64708167	64708390	2.60595	2.88896	0.14874	2.91236
chr8	7707087	7707339	1.78719	3.29504	0.8826	2.55799
chr12	91406975	91407194	2.12284	3.66081	0.78617	2.95815
chr12	47741265	47741512	2.2351	2.72417	0.285477	2.60616
chr2	172099071	172099340	2.0523	2.50137	0.285477	2.35997
chr5	150600092	150600361	2.0523	2.50137	0.285477	2.35997
chr15	22684861	22685055	2.47128	3.98497	0.689309	3.29983
chr6	4182030	4182303	2.5544	1.94032	-0.396694	2.30928
chr9	107039518	107039720	2.6611	3.40191	0.354324	3.17837
chr17	4186433	4186690	1.92201	2.8967	0.591792	2.47703
chr10	15850475	15850731	2.95103	1.90139	-0.634162	2.48828
chr6	158300416	158300616	3.77732	2.43378	-0.634162	3.20056
chr7	124536356	124536651	2.56089	1.65002	-0.634162	2.07913
chr5	107533923	107534224	1.73759	2.33057	0.4236	2.01777
chr2	68427280	68427503	2.73624	2.69636	-0.0211847	2.88321
chr7	46154175	46154406	2.64148	2.60298	-0.0211847	2.78151
chr1	153123701	153123937	2.40084	2.72982	0.185266	2.71234
chr18	24926732	24926968	2.40084	2.72982	0.185266	2.71234
chr5	36739984	36740200	2.62314	2.98258	0.185266	2.96785
chrX	40175115	40175336	3.28691	2.2673	-0.535758	2.89771
chr19	13843526	13843735	2.43294	3.42497	0.493388	3.0588
chr1	203428892	203429215	0.989534	3.50153	1.82316	1.79281
chr17	42329058	42329332	2.54508	1.88098	-0.436222	2.2592
chr10	72245111	72245332	2.69527	2.72076	0.0135807	2.87444
chr5	17056093	17056315	2.61769	2.77299	0.0831519	2.85974
chr1	120069610	120069839	2.72799	2.50068	-0.125521	2.77016
chr11	71589256	71589465	3.05856	2.67148	-0.195214	3.03049
chr19	44753325	44753552	2.81603	2.45964	-0.195214	2.79211
chr15	70616377	70616602	3.35762	2.09974	-0.67723	2.81765
chr13	110942332	110942553	1.97215	3.69246	0.904815	2.86435
chr1	118649973	118650211	2.25858	2.76703	0.292924	2.64375
chr7	111113643	111113858	2.77049	2.7301	-0.0211847	2.91909
chr2	54629967	54630206	1.82362	3.35447	0.87928	2.61289
chr22	50008241	50008407	3.06316	4.13968	0.434495	3.66454
chr3	11631800	11632018	2.66572	2.7582	0.0492046	2.87825
chr2	158885397	158885612	2.83806	2.66351	-0.091574	2.91823
chr20	9072939	9073171	2.6301	2.46834	-0.091574	2.69866
chr17	9021128	9021367	2.73543	2.21634	-0.303584	2.59995
chr3	5023388	5023649	2.50485	2.02952	-0.303584	2.34587
chr7	116230310	116230541	3.27041	1.98322	-0.721624	2.69732
chr7	92945963	92946179	3.09396	2.38606	-0.374822	2.88409
chr5	175344583	175344801	3.33215	2.16716	-0.620647	2.85226
chr1	57119545	57119803	2.6466	1.94214	-0.446491	2.36179
chr5	144189891	144190102	2.40988	3.18896	0.404121	2.94205
chr12	105095364	105095591	3.39204	1.9551	-0.794909	2.72939
chr3	72075875	72076102	2.56003	2.58578	0.0144392	2.72676
chr11	118145540	118145731	3.11861	2.99819	-0.0568086	3.225
chr17	1081246	1081483	2.51331	2.41627	-0.0568086	2.60237
chr12	58207064	58207318	2.2307	2.36728	0.0857305	2.40072
chr10	79529020	79529242	2.4868	2.77299	0.157153	2.78573
chr10	97172279	97172485	2.67995	2.98837	0.157153	3.00157
chr2	133435171	133435421	2.78941	1.94703	-0.518684	2.44123
chrX	74242148	74242421	1.96902	2.3074	0.228794	2.18374
chr17	72127007	72127233	1.92852	3.42073	0.826812	2.72179
chr6	15344221	15344439	2.06593	3.41492	0.725059	2.81864
chr1	171881433	171881703	1.88328	2.43909	0.373094	2.19959
chr12	76878783	76878943	3.17803	4.11596	0.373094	3.70936
chrX	13669206	13669497	1.74737	2.26307	0.373094	1.98347
chr17	27104625	27104820	2.98013	2.93669	-0.0211847	3.12957
chr5	77722363	77722620	2.26119	2.22823	-0.0211847	2.33298
chr9	79189669	79189955	2.03191	2.00229	-0.0211847	2.02449
chr15	85795736	85795916	2.74421	3.73817	0.445941	3.35872
chr12	94706462	94706639	3.93984	2.66916	-0.561753	3.39452
chr17	39864164	39864324	3.26883	3.937	0.268322	3.68587
chr5	178626426	178626640	2.44399	2.94355	0.268322	2.8468
chr1	170593353	170593607	2.57389	1.97273	-0.383755	2.34414
chr3	8682998	8683240	1.50084	3.72699	1.31224	2.48378
chr2	43226069	43226406	2.32795	1.23197	-0.918091	1.52003
chr5	76831203	76831393	2.59977	3.46607	0.414914	3.17169
chr11	34243785	34244001	2.62314	2.65118	0.0153412	2.79793
chr10	7691318	7691573	2.27893	2.18956	-0.0577106	2.319
chr4	77650882	77651102	2.64148	2.5379	-0.0577106	2.74499
chr1	182616187	182616415	2.42136	2.57444	0.0884398	2.64007
chr2	172097244	172097484	2.48189	2.26676	-0.130809	2.49207
chr11	114044092	114044311	2.45453	2.74561	0.161679	2.75257
chr17	42682410	42682577	4.17576	2.74326	-0.606147	3.51793
chr10	94543852	94544038	3.51488	2.61697	-0.425575	3.20137
chr11	30323182	30323416	2.79388	2.08016	-0.425575	2.53896
chr20	20872567	20872788	1.97215	3.30378	0.74435	2.70388
chr3	79477302	79477491	2.921	3.02992	0.0528159	3.14574
chr7	36258544	36258711	2.87083	3.94343	0.457983	3.50092
chrX	13573083	13573265	2.63423	3.61843	0.457983	3.25274
chr17	17782272	17782521	1.63369	3.10476	0.926348	2.34261
chr7	155682005	155682184	3.40884	2.87927	-0.243577	3.29499
chr7	39589675	39589963	2.92581	1.29245	-1.17873	1.91894
chrX	74423967	74424168	2.52978	3.06271	0.275797	2.95382
chr7	106425050	106425273	2.80139	2.24697	-0.318166	2.65412
chr9	130073511	130073696	2.67004	3.40498	0.350784	3.18451
chr2	108617935	108618124	3.45908	2.49969	-0.468644	3.11214
chr6	4334180	4334430	2.61507	1.88976	-0.468644	2.30505
chr6	159929965	159930169	3.20474	2.31588	-0.468644	2.89177
chr1	1215141	1215406	2.90563	1.51267	-0.94175	2.13595
chr9	113350387	113350604	2.5441	2.57299	0.01629	2.7106
chr5	163434534	163434743	2.78051	2.53448	-0.133659	2.81704
chr5	89313846	89314094	1.69886	2.94409	0.79326	2.32239
chr11	27019277	27019500	3.32258	1.86177	-0.835629	2.62898
chr1	118335495	118335675	3.30919	2.86328	-0.208812	3.24414
chr18	34626852	34627050	3.00835	2.60298	-0.208812	2.96914
chr3	129534783	129534992	2.85002	2.46598	-0.208812	2.81313
chr4	76850108	76850343	2.5347	2.19315	-0.208812	2.47482
chr7	92955207	92955424	3.0797	2.11117	-0.544747	2.70083
chr13	28586697	28586882	3.848	2.32157	-0.729004	3.15921
chr6	168092988	168093204	3.29574	1.98839	-0.729004	2.7122
chr4	155900548	155900778	2.14764	2.67654	0.317617	2.52312
chr3	131731811	131732103	2.68671	1.32377	-1.02118	1.8305
chr21	25639387	25639589	3.38031	2.19707	-0.621577	2.89274
chr2	95345184	95345377	2.33354	3.48637	0.579208	3.02425
chr12	11893285	11893497	1.91881	3.51156	0.8719	2.75233
chr12	54011439	54011631	3.93471	2.08781	-0.91427	3.03824
chr16	75000907	75001087	3.55133	2.62467	-0.436222	3.22049
chr17	28728181	28728357	3.63204	2.68432	-0.436222	3.28534
chr6	64776972	64777196	2.85374	2.10911	-0.436222	2.58949
chr10	62055020	62055263	2.6904	1.88528	-0.513038	2.3426
chr10	132453107	132453289	3.59213	2.51717	-0.513038	3.17664
chr10	112952001	112952168	3.4798	3.08617	-0.173188	3.42482
chr12	62848559	62848778	2.65354	2.35338	-0.173188	2.64265
chr6	3520651	3520831	3.22848	2.86328	-0.173188	3.20852
chr17	64965928	64966088	3.17803	3.66857	0.207084	3.54335
chr3	10292810	10293015	1.98433	3.56164	0.843886	2.82119
chr17	77961954	77962123	2.92282	3.55792	0.28367	3.3784
chr1	183471235	183471493	2.36505	1.88665	-0.326039	2.1577
chr17	81405470	81405689	2.78622	2.22263	-0.326039	2.63058
chr7	111562335	111562591	2.38353	1.90139	-0.326039	2.18015
chr17	59832981	59833141	2.63323	4.38439	0.735544	3.52921
chr6	35107267	35107437	2.47833	4.12649	0.735544	3.35428
chr5	58259697	58259930	2.3694	2.27342	-0.0596589	2.42938
chr4	173117467	173117658	2.96648	2.69838	-0.136662	3.00084
chr1	233241884	233242084	4.43109	1.64638	-1.42836	2.86696
chr18	10128989	10129226	1.71641	3.02033	0.815317	2.3741
chr2	202173034	202173277	1.49467	3.29925	1.14231	2.30196
chr16	50741908	50742110	2.87686	2.48056	-0.21383	2.83516
chr10	13100020	13100187	3.91477	2.65753	-0.558841	3.37901
chr12	48969224	48969453	1.96669	2.81326	0.516472	2.46802
chr12	25992405	25992610	2.9765	2.30459	-0.369108	2.77813
chr2	71023634	71023834	1.88866	3.79384	1.0063	2.84102
chr20	11267532	11267745	2.59188	2.41967	-0.0991872	2.64881
chr18	65934942	65935205	3.59061	1.14313	-1.65124	2.03722
chr18	24739984	24740171	3.02994	2.67954	-0.177304	3.02127
chr9	123678826	123679032	2.39785	2.77988	0.213281	2.73676
chr8	26480122	26480318	2.96493	2.48345	-0.25565	2.88035
chr17	57533698	57533913	1.89204	3.19621	0.756423	2.59631
chr10	124092669	124092924	1.82314	2.35799	0.371133	2.10398
chr2	172097970	172098175	2.26781	2.93311	0.371133	2.73373
chr6	12011242	12011442	2.3245	3.00644	0.371133	2.80498
chr6	12479938	12480119	4.4949	1.8983	-1.24358	3.093
chr10	77291821	77292108	2.12607	1.59625	-0.413502	1.76288
chr5	126483238	126483426	2.85926	2.74143	-0.0607131	2.97057
chr11	15069741	15070022	0.982331	3.56636	1.86017	1.80873
chr1	234608155	234608322	3.30581	3.00044	-0.139829	3.31018
chr10	61835940	61836177	2.32941	2.11423	-0.139829	2.3001
chr7	100450471	100450688	2.5441	2.30909	-0.139829	2.55448
chr10	102395521	102395716	2.53311	2.86328	0.176755	2.85858
chr5	31975229	31975417	2.00921	3.8837	0.950801	2.96406
chr5	129077497	129077727	2.46347	2.11633	-0.219124	2.38226
chr8	105404919	105405114	2.90563	2.49619	-0.219124	2.85858
chr12	10740224	10740396	2.53398	3.66233	0.531356	3.21417
chr19	35013002	35013188	2.34325	3.38667	0.531356	2.98838
chr6	1856475	1856651	2.47639	3.57909	0.531356	3.14783
chr1	64469981	64470186	2.90563	2.23475	-0.378737	2.69897
chr6	142945134	142945355	2.69527	2.07296	-0.378737	2.48212
chr17	28216161	28216365	2.99109	2.17553	-0.459306	2.70204
chr2	71049755	71049997	1.50084	3.07625	1.0354	2.20694
chr5	10564134	10564311	3.93984	2.18385	-0.85126	3.10501
chr12	32252600	32252775	3.07167	2.86328	-0.101355	3.13669
chr6	19247081	19247266	2.67004	2.94066	0.13928	2.973
chr7	105012522	105012682	2.72403	3.84753	0.498189	3.38967
chr18	44852969	44853237	2.33101	1.60258	-0.540559	1.90135
chr20	20869461	20869658	3.17112	2.18016	-0.540559	2.78943
chr7	69007109	69007348	1.21575	3.83367	1.65689	2.22057
chr5	159961418	159961666	2.34325	1.84727	-0.343113	2.11391
chr6	17042867	17043088	2.62953	2.07296	-0.343113	2.4465
chr9	86508652	86508841	3.07474	2.42394	-0.343113	2.89782
chr8	47218317	47218543	2.63564	1.96375	-0.42454	2.37176
chr18	2847372	2847600	2.8674	1.75815	-0.705683	2.3338
chr3	104764154	104764382	2.16648	2.32327	0.100806	2.33151
chr17	76565258	76565418	2.99643	3.40014	0.182349	3.34884
chr8	107489787	107490001	2.57977	2.20767	-0.224718	2.50976
chr7	117020024	117020260	1.539	3.03313	0.978815	2.2228
chr1	56449026	56449211	2.51298	3.01805	0.264218	2.92301
chr5	50564242	50564405	2.85215	3.42539	0.264218	3.28832
chr17	200322	200548	1.28568	3.9275	1.61108	2.33614
chrX	71989931	71990146	1.89204	2.92986	0.630892	2.47078
chr12	56443343	56443515	2.53398	3.41263	0.429477	3.11229
chr12	89960282	89960521	2.857	1.55743	-0.875334	2.15367
chr1	150562915	150563099	2.60559	2.87884	0.143875	2.9071
chr1	44318360	44318527	2.52285	3.60053	0.513152	3.18326
chr15	62119581	62119802	2.76101	1.87862	-0.555521	2.37487
chr4	155891090	155891298	2.2351	2.61549	0.226743	2.54742
chr5	126395444	126395637	2.40881	2.81877	0.226743	2.76339
chr6	121797717	121797903	2.96812	2.46303	-0.269112	2.86998
chr2	222448928	222449131	3.07739	1.97467	-0.640095	2.60332
chr4	184275872	184276063	3.27074	2.09874	-0.640095	2.77914
chr10	5692724	5692916	2.27002	2.98258	0.393853	2.75927
chr22	42274131	42274312	2.72905	2.76836	0.0206355	2.91743
chr12	2358052	2358212	2.63323	3.66857	0.478386	3.27205
chr1	100611531	100611719	3.16837	2.20838	-0.520756	2.80673
chr4	172736094	172736298	2.91987	2.03517	-0.520756	2.57106
chr7	1359099	1359301	2.37341	2.55143	0.104346	2.59827
chr11	442089	442286	2.72864	2.3255	-0.230638	2.66572
chr13	113383230	113383406	3.05421	2.60298	-0.230638	2.99096
chr2	64686345	64686523	3.0199	2.57373	-0.230638	2.95836
chr2	30155311	30155478	3.30581	2.65753	-0.314916	3.13509
chr10	93238544	93238789	2.49054	1.63616	-0.606147	2.02677
chr4	81577511	81577708	3.09737	2.03482	-0.606147	2.65594
chr6	84492868	84493035	4.08876	2.14317	-0.931917	3.13141
chr17	17691918	17692113	1.86258	3.45061	0.889548	2.68416
chr10	29659055	29659310	1.25341	2.97556	1.2473	1.89902
chr9	38319117	38319324	1.89498	2.97393	0.650193	2.49455
chrX	40871377	40871612	2.65834	1.64486	-0.692562	2.12849
chr10	15523412	15523615	2.07545	2.82096	0.442762	2.54961
chr4	185556317	185556572	2.27893	1.62814	-0.485132	1.89158
chr2	69260174	69260362	2.62743	2.58913	-0.0211847	2.76612
chr8	122835940	122836107	2.95783	2.91471	-0.0211847	3.10789
chr10	45710286	45710488	2.30149	2.55143	0.14874	2.55388
chr7	88759479	88759704	2.06623	2.29062	0.14874	2.24274
chr17	8059331	8059534	2.57642	2.25677	-0.19111	2.53963
chr6	103367249	103367514	2.74116	1.24255	-1.14148	1.7681
chr1	220733181	220733360	3.32768	2.23943	-0.571382	2.89765
chr10	65501260	65501468	2.86372	1.9272	-0.571382	2.4644
chr10	87651837	87652057	2.90563	1.69194	-0.780177	2.29753
chr11	102346043	102346215	3.9699	1.99763	-0.990811	2.9874
chr1	193408846	193409061	2.2299	2.26399	0.021884	2.33585
chrX	41442157	41442336	2.27256	3.19919	0.493388	2.86203
chr10	29621240	29621411	2.71872	2.93025	0.108098	2.99395
chr14	27605307	27605570	1.76768	1.90522	0.108098	1.75182
chr1	228903078	228903247	3.00879	2.71079	-0.150468	3.0279
chr15	90854752	90854918	3.06316	2.75978	-0.150468	3.07958
chr5	136953751	136953921	3.41839	2.35799	-0.535758	3.01088
chr5	67073424	67073607	2.06411	3.36396	0.70464	2.79568
chr5	113266343	113266541	1.90774	3.10911	0.70464	2.56837
chr2	34210423	34210614	3.27074	1.94883	-0.74701	2.67222
chr3	189710761	189710941	2.98634	2.38606	-0.323747	2.83301
chr12	76083882	76084055	2.2674	3.3929	0.58148	2.94356
chr18	59516439	59516630	3.11861	2.02378	-0.623849	2.65796
chr2	61950002	61950310	2.26413	1.06908	-1.08259	1.27533
chr18	48419357	48419538	2.32772	3.00565	0.368762	2.80659
chr2	108377537	108377720	2.30228	2.9728	0.368762	2.77488
chr5	159900029	159900266	1.71641	2.35586	0.456863	2.01564
chr19	5457944	5458126	2.07545	3.30378	0.670693	2.77754
chr4	2206182	2206392	2.283	2.24972	-0.0211847	2.36067
chr1	180530617	180530800	2.69922	2.50341	-0.108648	2.75644
chr11	110092693	110092874	2.48825	2.76836	0.153902	2.78416
chr3	96416897	96417102	2.48042	2.16492	-0.196271	2.42489
chr5	80011031	80011214	2.77861	2.42518	-0.196271	2.75245
chr12	29750802	29751014	2.05587	2.43108	0.24185	2.32135
chr4	140870465	140870674	2.50246	2.05498	-0.284219	2.36247
chr8	41828455	41828652	2.65489	2.18016	-0.284219	2.53309
chr17	59846323	59846498	3.32072	2.20881	-0.588225	2.87477
chr2	176107025	176107236	2.75415	1.83195	-0.588225	2.33499
chr3	15738722	15738908	3.20244	2.00121	-0.678297	2.68005
chr5	142857593	142857764	3.48336	2.17676	-0.678297	2.92266
chr17	66985442	66985616	3.17282	2.30379	-0.461757	2.86977
chr2	24360739	24360933	2.84572	2.06628	-0.461757	2.55583
chr5	55994508	55994762	2.63108	1.29637	-1.02118	1.77013
chr14	67131882	67132069	2.4861	2.52642	0.0232094	2.65098
chr5	149780864	149781024	2.90563	2.95275	0.0232094	3.10091
chr12	31875397	31875589	2.49703	2.38606	-0.0655788	2.57484
chr2	142165844	142166025	2.64878	2.53107	-0.0655788	2.74508
chr1	116573847	116574034	1.86458	3.36856	0.853284	2.65098
chr2	218799165	218799356	2.58616	2.3236	-0.154451	2.58718
chr1	31938679	31938839	2.45163	3.48962	0.50933	3.09681
chr6	32861214	32861467	1.03362	3.28202	1.66687	1.76229
chr1	36149705	36149887	2.07545	3.14646	0.600304	2.70715
chr1	14921163	14921323	2.54243	3.31066	0.380914	3.07333
chr3	67386544	67386725	2.24745	2.92655	0.380914	2.71749
chr5	1118254	1118460	1.9747	2.57139	0.380914	2.34418
chr7	452876	453053	2.29824	2.99269	0.380914	2.78197
chr2	177038911	177039136	2.38907	1.78159	-0.423283	2.08962
chr1	78885174	78885347	1.93149	3.72391	0.947106	2.84653
chr17	1228326	1228533	3.01793	1.65987	-0.862487	2.32463
chr8	8390039	8390213	3.17282	2.22151	-0.514225	2.8173
chr9	19128790	19128973	3.01678	2.11225	-0.514225	2.67179
chr13	91623299	91623467	2.16193	3.49388	0.692511	2.91715
chr17	27856840	27857015	2.57356	2.69966	0.0690131	2.79654
chr15	80674284	80674444	2.72403	3.04223	0.159388	3.05087
chr1	202339940	202340133	2.93574	1.92863	-0.606147	2.5013
chr12	106022729	106022896	3.3928	2.2289	-0.606147	2.91881
chr4	88304646	88304862	2.62314	1.72327	-0.606147	2.17644
chr7	78099787	78100070	2.25879	1.16352	-0.957054	1.39405
chr2	190718810	190719024	3.12287	1.47178	-1.08532	2.20043
chr4	76023475	76023731	2.61053	1.23031	-1.08532	1.68337
chr14	94418023	94418187	2.12607	3.66639	0.78617	2.96255
chr3	16477165	16477368	3.00582	1.69258	-0.82854	2.34698
chr17	61494669	61494856	1.94227	3.06233	0.656887	2.57237
chr9	22005004	22005173	2.14914	3.38849	0.656887	2.8644
chr8	135417172	135417388	2.48862	1.78955	-0.475751	2.15494
chr8	69179048	69179212	2.65759	2.88073	0.116319	2.93655
chr10	14991420	14991613	1.65606	3.33802	1.01124	2.46674
chr10	24383831	24384038	1.61424	2.97393	0.881518	2.26323
chr2	66535666	66535908	2.58145	1.36065	-0.923888	1.81247
chr7	146639376	146639547	3.65328	1.92559	-0.923888	2.8145
chr14	68232668	68232853	2.04179	2.94066	0.526303	2.58598
chr7	11267698	11267858	2.36082	3.40014	0.526303	3.00489
chr7	94022623	94022831	2.65418	1.78955	-0.568673	2.24786
chr15	70853300	70853460	2.63323	3.04223	0.208297	3.00196
chr22	40274178	40274430	1.67189	1.93157	0.208297	1.69126
chr6	138017433	138017607	2.42136	2.79745	0.208297	2.75993
chr2	100743022	100743184	2.15232	3.62328	0.751405	2.96319
chr2	66574685	66574877	2.64836	2.08781	-0.343113	2.46709
chr7	16591685	16591866	2.00665	3.08474	0.620361	2.62994
chr3	8975556	8975723	3.3928	2.14317	-0.662731	2.86222
chr15	101105363	101105563	1.9613	2.57695	0.393853	2.33747
chrX	31070265	31070469	1.92284	2.52642	0.393853	2.28034
chr17	57987183	57987381	2.64148	1.95223	-0.436222	2.36647
chr10	32214044	32214267	2.4105	1.66917	-0.530198	2.00847
chr1	61374330	61374493	2.76302	2.72275	-0.0211847	2.91131
chr3	75362503	75362669	2.62557	2.75978	0.0719247	2.85719
chr1	32428184	32428395	1.37708	3.25681	1.24185	2.16507
chr5	59317191	59317364	2.35138	2.81362	0.258923	2.72594
chr1	201184739	201184947	2.37479	1.9272	-0.301293	2.19431
chr10	113855091	113855274	3.41372	1.72109	-0.988018	2.55467
chr7	81299172	81299353	2.80931	2.13559	-0.39558	2.58485
chr1	210213436	210213702	0.76464	3.60601	2.23755	1.46325
chr1	63731610	63731797	2.79686	1.99051	-0.49067	2.47695
chr14	73760331	73760511	2.50207	2.38606	-0.0684904	2.57775
chr7	124103420	124103626	1.1284	4.03083	1.8368	2.18535
chr5	73437207	73437446	2.24913	1.49753	-0.586782	1.75195
chr5	104265949	104266116	2.87083	2.40035	-0.258224	2.78471
chr13	112140329	112140532	1.57448	2.96201	0.911701	2.22145
chr2	201118535	201118736	1.44559	3.27639	1.18045	2.24376
chr3	119323116	119323291	1.90941	3.27232	0.777181	2.64344
chr7	651453	651767	2.63728	0.729497	-1.85407	0.944023
chr2	100105140	100105318	3.10152	1.9303	-0.68415	2.5818
chr5	143183047	143183207	2.36082	3.13171	0.407659	2.88624
chr15	87752602	87752806	1.49555	3.01767	1.01276	2.17411
chr6	158468031	158468248	2.74495	1.45143	-0.919305	1.99426
chr4	69034458	69034663	2.55129	1.7459	-0.547254	2.1552
chr11	11622291	11622467	2.06366	2.92835	0.504884	2.59529
chr12	106248481	106248682	2.0961	2.208	0.0750306	2.21045
chr4	74099158	74099355	2.87613	1.67146	-0.783025	2.26523
chr13	84296479	84296657	2.28533	2.57373	0.17146	2.55626
chr4	74039443	74039624	2.72905	2.0565	-0.408208	2.48858
chr22	37676693	37676882	3.76656	1.36346	-1.46597	2.36052
chr12	75986452	75986641	1.61424	3.18142	0.978815	2.36052
chr5	156090618	156090806	3.24565	1.59917	-1.02118	2.37583
chr8	108939530	108939805	2.21885	1.09325	-1.02118	1.27843
chr1	181090150	181090363	1.29594	3.0918	1.25445	2.00244
chr8	21697749	21697946	1.69618	2.76154	0.703181	2.22776
chr2	191063486	191063698	2.1244	1.89084	-0.168026	2.00608
chr6	22071394	22071562	2.76727	2.30085	-0.266297	2.67063
chr3	16146181	16146396	2.90563	1.33176	-1.12552	1.95218
chr13	110371933	110372094	2.34616	2.93441	0.32277	2.78337
chr20	61436775	61436997	1.2434	2.90197	1.22274	1.85132
chr15	32345024	32345222	2.71486	1.66301	-0.707076	2.17468
chr17	78477092	78477296	3.77447	1.12285	-1.74911	2.08344
chr8	64756865	64757032	2.60985	2.40035	-0.12072	2.64721
chr2	128458237	128458397	2.17922	3.13171	0.523136	2.77076
chr3	8504416	8504591	2.90563	1.96339	-0.565505	2.5122
chr3	42120877	42121044	3.04482	2.05744	-0.565505	2.64721
chr12	14769081	14769265	3.15829	1.63393	-0.950795	2.3675
chr10	80231070	80231263	3.16157	1.48356	-1.09157	2.22971
chr15	92809530	92809697	2.69684	2.31462	-0.220494	2.64205
chr11	67583414	67583620	2.67995	1.52893	-0.809681	2.03473
chr2	66080188	66080366	3.10152	1.76944	-0.809681	2.45627
chr13	48207258	48207434	2.64148	2.11492	-0.320745	2.48195
chr9	3508587	3508790	2.29015	1.83362	-0.320745	2.07014
chr15	30193471	30193633	2.33168	2.82793	0.278376	2.72111
chr3	127860363	127860560	1.91742	2.3255	0.278376	2.15671
chr6	3209550	3209781	2.89305	1.11556	-1.37482	1.69036
chr2	96505364	96505539	1.90941	2.94508	0.625178	2.49144
chr10	51113806	51114032	1.15711	2.91395	1.33245	1.7535
chr2	66067954	66068125	1.52928	3.85119	1.33245	2.55816
chr6	72901370	72901537	3.13182	1.97172	-0.667548	2.62645
chr9	112028852	112029038	1.64028	3.00182	0.8719	2.29978
chr1	18194903	18195074	1.61424	3.60003	1.15715	2.53886
chr22	21095607	21095767	1.72522	3.84753	1.15715	2.73071
chr19	2476600	2476803	3.07739	1.33996	-1.19952	2.04389
chr10	110496082	110496242	1.99762	3.31066	0.728837	2.7254
chr2	60881446	60881618	1.85825	3.07969	0.728837	2.51673
chr2	68467415	68467582	3.21881	1.88599	-0.771206	2.60185
chr7	3862133	3862293	2.45163	2.68432	0.130818	2.7183
chr7	83537316	83537476	2.45163	2.68432	0.130818	2.7183
chr3	172607404	172607574	2.64925	2.18956	-0.274941	2.53623
chr13	58768188	58768392	2.49258	1.6141	-0.626906	2.00837
chr16	48385855	48386049	2.3964	1.84489	-0.377329	2.1444
chr17	39920818	39920985	2.87083	2.05744	-0.480616	2.56232
chr16	3959335	3959495	2.17922	2.95275	0.438247	2.68587
chr5	42108616	42108846	2.27397	1.36939	-0.731678	1.63875
chr10	12707613	12707786	2.2674	2.39986	0.0819088	2.44399
chr11	64723760	64723927	2.52285	2.31462	-0.124278	2.54583
chr20	34345060	34345251	2.20585	2.02378	-0.124278	2.15839
chr11	60925918	60926112	3.44482	1.25453	-1.45728	2.11157
chr11	86925166	86925379	2.31905	1.5459	-0.585086	1.84198
chr5	55903430	55903607	2.79072	1.86032	-0.585086	2.37619
chr9	130314941	130315118	2.79072	1.86032	-0.585086	2.37619
chr6	29559655	29559822	2.60985	2.2289	-0.227636	2.5403
chr9	86585947	86586114	2.69684	2.14317	-0.331525	2.53102
chr1	170591485	170591698	2.38726	1.47869	-0.691036	1.81967
chr8	100900516	100900694	2.6118	1.9303	-0.436222	2.33387
chr11	795065	795226	2.16569	2.84549	0.393853	2.6235
chr4	81550040	81550220	1.29139	3.8177	1.56378	2.30163
chr1	56332372	56332548	1.65093	3.09104	0.904815	2.35137
chr6	142375373	142375556	3.01678	1.56463	-0.947184	2.23883
chr4	73869249	73869416	2.87083	1.97172	-0.542017	2.50092
chr11	19475529	19475698	1.9772	2.79551	0.499647	2.46657
chr9	22240764	22240946	3.35265	1.41591	-1.24358	2.24703
chr13	70457630	70457790	2.27002	2.68432	0.24185	2.60726
chrX	46710445	46710618	1.84751	2.81362	0.606847	2.37801
chr7	69682940	69683112	2.02718	2.58028	0.348049	2.387
chr11	125410172	125410363	1.52127	2.77333	0.866341	2.0769
chr19	44748676	44748836	1.81602	3.31066	0.866341	2.5879
chr7	86548149	86548309	1.81602	3.31066	0.866341	2.5879
chr2	53424224	53424401	3.03696	1.61767	-0.90871	2.29654
chrX	42143958	42144144	3.20244	1.38546	-1.20881	2.14953
chr12	126772559	126772729	2.82017	1.85271	-0.606147	2.38542
chr10	8416466	8416633	2.60985	2.05744	-0.343113	2.42482
chr8	139705898	139706096	1.46749	2.60298	0.826812	1.93351
chr9	129752334	129752527	1.50551	2.67041	0.826812	2.00731
chr11	63435696	63435866	2.05103	2.52642	0.300743	2.37345
chr3	72659622	72659801	1.46093	3.19919	1.13082	2.2246
chr8	143285388	143285548	1.63442	3.57909	1.13082	2.54837
chr1	116571619	116571789	2.90563	1.76849	-0.71633	2.36137
chr4	156941993	156942176	2.69922	1.64286	-0.71633	2.14875
chr7	42392613	42392850	3.12631	0.845693	-1.88626	1.40267
chr3	16399527	16399748	1.3805	2.20252	0.673961	1.60435
chr9	33186619	33186790	1.78416	2.84653	0.673961	2.34445
chr2	235706547	235706722	1.57734	3.02689	0.940341	2.25533
chr17	80260332	80260499	3.21881	1.62881	-0.982711	2.39035
chr14	63223998	63224190	2.64836	1.49129	-0.82854	1.98166
chr18	3771104	3771283	2.8407	1.5996	-0.82854	2.18395
chr6	150528817	150528996	1.46093	3.03923	1.05682	2.1506
chr6	32718958	32719118	1.99762	2.7738	0.47358	2.47015
chr11	67979159	67979341	1.5965	2.67449	0.74435	2.09418
chr6	32853649	32853834	2.67004	1.54772	-0.786719	2.047
chr18	22817990	22818175	2.51298	1.6251	-0.628867	2.02993
chr1	14621666	14621859	1.58078	2.3737	0.586498	1.90778
chr18	3003983	3004171	1.62283	2.43683	0.586498	1.98351
chr13	73672768	73672935	2.52285	1.97172	-0.355604	2.31451
chr5	103918623	103918880	2.48731	0.835586	-1.57373	1.05545
chr17	9648020	9648187	2.60985	1.88599	-0.468644	2.29929
chr9	97511176	97511348	1.68932	2.74675	0.701281	2.21417
chr8	96610797	96610961	1.9489	2.61885	0.426274	2.35159
chr8	8889218	8889388	2.82017	1.68428	-0.743651	2.24791
chr16	2468951	2469145	1.34797	2.65665	0.978815	1.8404
chr1	153364162	153364349	2.79686	1.37805	-1.02118	1.94644
chr6	126807654	126807824	3.07655	1.51585	-1.02118	2.22144
chr1	161618727	161618924	1.2537	2.76154	1.13928	1.79166
chr6	1701962	1702153	1.29308	2.84828	1.13928	1.88091
chr7	90838616	90838792	1.56838	2.76566	0.818351	2.1169
chr10	21818192	21818427	0.927329	2.61959	1.49819	1.2805
chr11	96343355	96343522	2.43586	1.97172	-0.304978	2.26388
chrX	40012948	40013124	2.3113	1.87089	-0.304978	2.11243
chr10	56538067	56538250	1.58778	2.50341	0.656887	1.9909
chr13	95299760	95299934	1.6699	2.6329	0.656887	2.13642
chr14	92924346	92924510	1.77173	2.79344	0.656887	2.3072
chr13	58955879	58956065	1.24973	3.07879	1.30074	1.94398
chr4	72568958	72569189	1.00628	2.47903	1.30074	1.3188
chr2	73984760	73984927	2.52285	1.88599	-0.419734	2.25038
chr10	11123929	11124089	1.99762	2.59484	0.377365	2.37393
chr12	104520672	104520832	1.90682	2.68432	0.493388	2.35573
chr18	31261808	31261993	2.74857	1.39294	-0.980543	1.93682
chr11	66480720	66480896	1.40329	3.00969	1.10081	2.07843
chr2	25977895	25978084	2.53666	1.43921	-0.817651	1.86821
chr4	182978566	182978768	1.43843	2.19707	0.611084	1.66008
chr1	28599199	28599363	1.50597	3.14262	1.06128	2.24266
chr1	26072502	26072694	2.57269	1.34216	-0.938723	1.78784
chr8	121822840	121823007	2.52285	1.80026	-0.486848	2.18326
chr16	72663046	72663218	1.60485	2.66351	0.730888	2.09577
chr2	231405594	231405802	1.32709	2.20252	0.730888	1.54742
chr19	44747447	44747616	1.37545	3.21907	1.22674	2.14654
chr3	148344708	148344886	3.10152	1.28687	-1.26911	1.99683
chr4	18970754	18970958	0.99703	3.01767	1.59773	1.58914
chr5	36723936	36724132	2.59431	1.24173	-1.063	1.6877
chr1	179936262	179936429	2.87083	1.54308	-0.895654	2.14728
chr4	38319032	38319209	1.47744	2.66916	0.853284	1.97948
chr2	169748989	169749200	2.54759	1.0856	-1.23064	1.46763
chr6	96795077	96795246	2.66493	1.60953	-0.727454	2.10074
chr12	15175622	15175782	1.90682	2.50537	0.393853	2.25619
chr10	7302468	7302635	2.95783	1.45736	-1.02118	2.10789
chrX	1328029	1328209	1.29139	2.86328	1.14874	1.88659
chr1	164632845	164633016	1.52928	2.67909	0.80889	2.03459
chr12	111411355	111411515	1.63442	2.86328	0.80889	2.22644
chr8	120298912	120299078	1.57534	2.75978	0.80889	2.12022
chr8	75460504	75460681	2.95488	1.29414	-1.19111	1.93509
chr19	4229213	4229380	2.60985	1.62881	-0.680148	2.08778
chrX	41301587	41301776	2.53666	1.28772	-0.978116	1.70775
chr22	17781753	17781923	1.45282	2.77906	0.935747	2.01345
chr9	120928423	120928591	1.47011	2.81215	0.935747	2.0476
chr1	17787699	17787925	2.24994	1.01355	-1.15047	1.1893
chr13	50125550	50125717	3.04482	1.37163	-1.15047	2.06225
chr12	49253083	49253271	3.0911	1.06611	-1.53576	1.72048
chr4	155906990	155907157	2.69684	1.54308	-0.805456	2.05709
chr5	91079175	91079364	2.38292	1.36346	-0.805456	1.70001
chr3	179175001	179175173	1.26699	3.07969	1.28138	1.96419
chr5	151773037	151773214	2.62656	1.37502	-0.933722	1.85263
chr3	78872318	78872515	1.17995	2.47085	1.06628	1.54373
chr12	67572544	67572711	2.60985	1.54308	-0.75815	2.00978
chr1	94634970	94635185	0.946019	2.53034	1.41939	1.25927
chr11	61467748	61467943	2.45861	1.17468	-1.06558	1.53011
chr6	45590293	45590471	2.69342	1.28687	-1.06558	1.7933
chr5	138603684	138603851	2.52285	1.54308	-0.709241	1.96087
chr7	95067212	95067379	2.52285	1.54308	-0.709241	1.96087
chr7	27111671	27111936	2.19293	0.702313	-1.64267	0.623045
chrX	46205124	46205291	2.34886	1.62881	-0.528145	1.93578
chr17	40180263	40180437	2.67184	1.31645	-1.02118	1.81449
chr2	214895151	214895319	2.76727	1.36346	-1.02118	1.91574
chrX	40169593	40169801	2.72403	0.894774	-1.60615	1.28534
chr12	111304728	111304895	2.43586	1.54308	-0.658615	1.91025
chr9	90755856	90756023	2.43586	1.54308	-0.658615	1.91025
chr9	127627223	127627443	0.924519	2.34268	1.34139	1.11493
chr14	58777792	58777979	2.79686	1.07181	-1.38375	1.58387
chr14	24893443	24893610	2.60985	1.37163	-0.928075	1.83986
chr9	137299193	137299353	1.36201	2.86328	1.07192	1.96341
chr5	1105610	1105770	1.45282	2.68432	0.885706	1.96341
chr20	63698901	63699065	1.15162	3.14262	1.4483	1.85563
chr1	181179887	181180054	2.00088	1.71454	-0.222819	1.77846
chr7	72682842	72683009	2.60985	1.2859	-1.02118	1.74675
chr13	29455145	29455322	2.29824	1.29414	-0.82854	1.57252
chr8	26587705	26587872	2.43586	1.37163	-0.82854	1.74032
chr19	39941863	39942039	2.64148	1.1388	-1.21383	1.58887
chr15	91940908	91941068	1.36201	2.59484	0.929906	1.82139
chr5	175760089	175760249	1.27121	2.68432	1.07835	1.77076
chr4	24433414	24433581	3.04482	1.02872	-1.56551	1.64721
chr1	21604616	21604783	0.956944	3.25762	1.76731	1.64032
chr5	170151566	170151766	2.3245	0.930565	-1.32074	1.1131
chr10	103678246	103678416	0.854597	3.45277	2.01444	1.56107
chr4	81573991	81574196	0.566952	3.4918	2.62267	0.98527
chr3	169309008	169309177	2.83686	1.01655	-1.48062	1.52797
chr6	137707771	137707931	1.27121	2.50537	0.978815	1.67123
chr1	11667589	11667756	2.52285	1.11445	-1.17873	1.49139
chrX	105636788	105636948	1.18041	2.59484	1.13636	1.61494
chr9	136483871	136484031	1.08961	2.7738	1.34805	1.59568
chr15	96171013	96171180	2.60985	1.02872	-1.34311	1.42482
chr6	76490421	76490611	2.67624	0.753494	-1.82854	1.01187
chr6	137849584	137849751	2.52285	1.02872	-1.2942	1.37591
chr7	154965060	154965227	2.60985	0.942995	-1.46864	1.29929
chr10	83934162	83934322	0.726408	3.40014	2.22674	1.30445
chr9	81376644	81376821	2.62656	0.647068	-2.02118	0.765163
chr12	11746167	11746342	0.498108	3.35412	2.7514	0.740466
chr12	58695428	58695588	0.726408	2.68432	1.88571	0.963409
chr18	35650441	35650601	0.726408	2.50537	1.78617	0.863873
chr3	113472192	113472359	2.34886	0.685815	-1.77607	0.687853
chr18	48755251	48755411	0.635607	2.68432	2.07835	0.770763

## Sheet: ATAC-seq
ATAC-seq Samples	Replicate	Read pairs	Alignment rate	FRiP (%)
TNF-0h	rep1	41948866	0.7665	20.3
TNF-0h	rep2	48425237	0.7535	23.55
TNF-12h	rep1	45267274	0.6849	22.78
TNF-12h	rep2	56196446	0.705	22.93
TNF-12d+withdraw-10d	rep1	93383210	0.7894	22.16
TNF-12d+withdraw-10d	rep2	47759142	0.8022	22.56
TNF-12d+withdraw-10d+TNF12h	rep1	76395215	0.7423	22.58
TNF-12d+withdraw-10d+TNF12h	rep2	40997939	0.7382	21.67
