# Supplementary figures and images for: Sustained TNF-α stimulation leads to transcriptional memory that greatly enhances signal sensitivity and robustness
Source: eLife journal article supplement (doi:10.7554/elife.61965), 2020-11-06

**Figure 1—figure supplement 1**

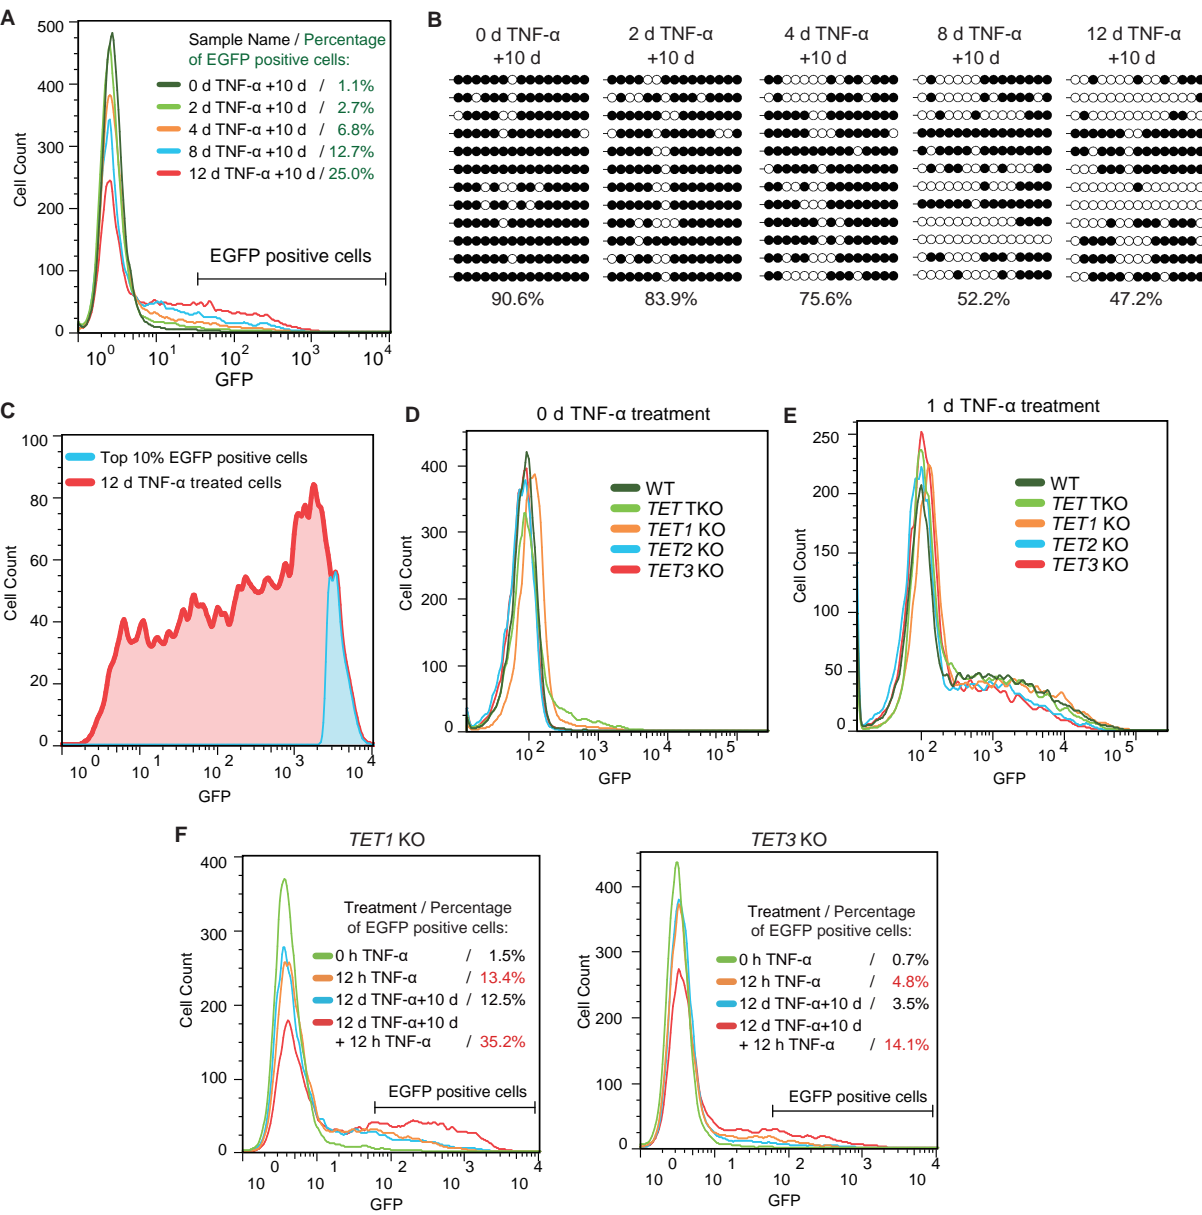

Supplement: supp [file elife_poa_e61965_Figure_1_figure_supplement_1.pdf › elife_poa_e61965_Figure_1_figure_supplement_1.pdf]

**Figure 5—figure supplement 1**

**A**

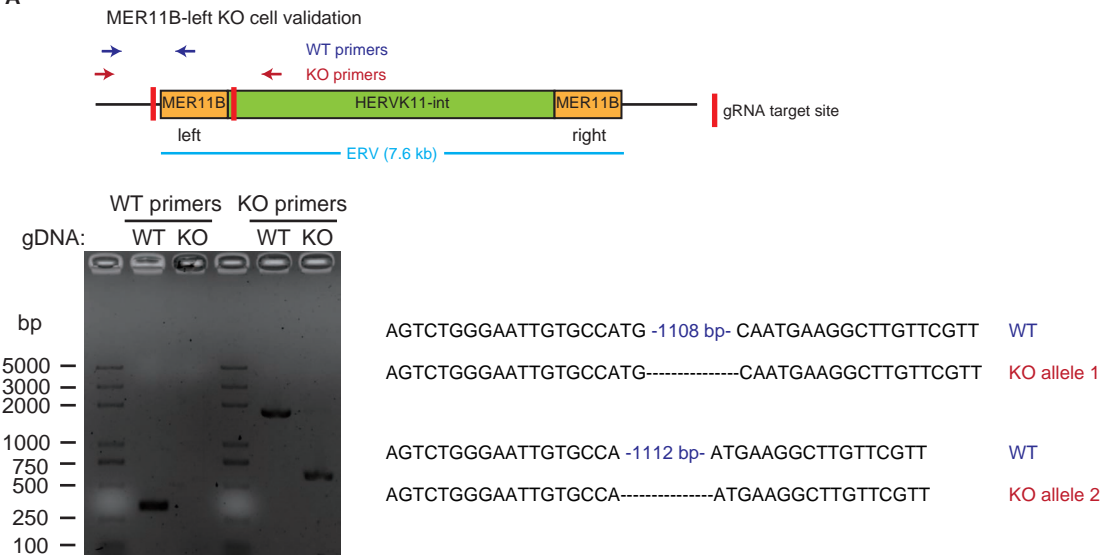

**B**

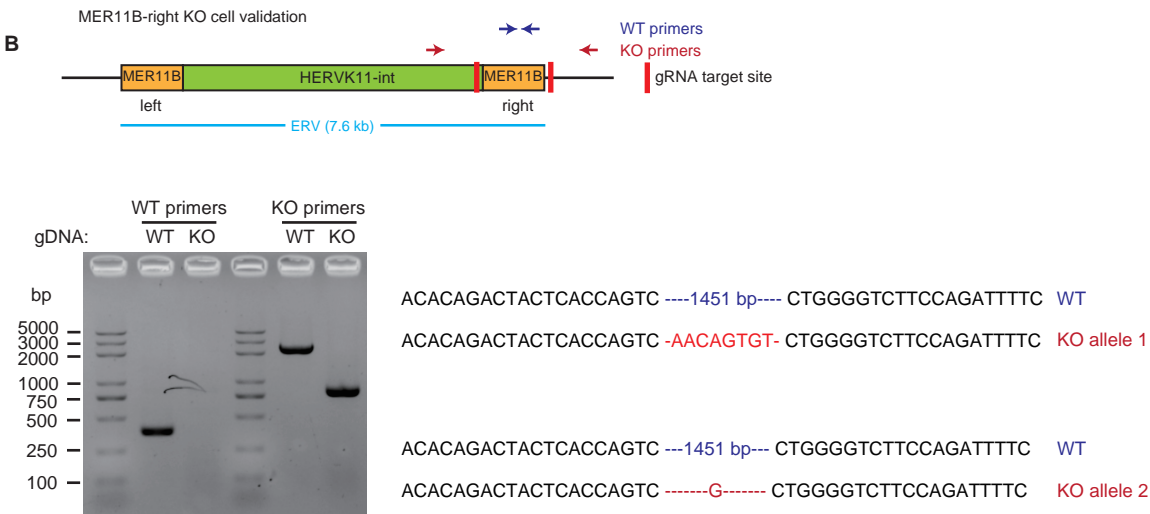

Supplement: supp [file elife_poa_e61965_Figure_5_figure_supplement_1.pdf › elife_poa_e61965_Figure_5_figure_supplement_1.pdf]

**Figure 6 - figure supplement 1**

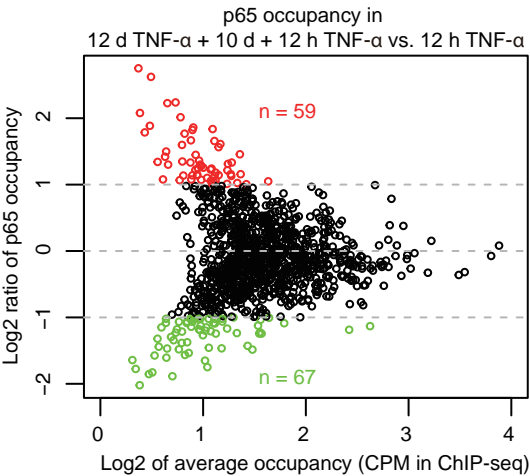

Supplement: supp [file elife_poa_e61965_Figure_6_figure_supplement_1.pdf › elife_poa_e61965_Figure_6_figure_supplement_1.pdf]
